# Supplementary material
Source: PubMed Central journal article supplement (PMC3432299)

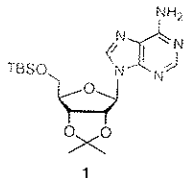

STANDARD 1H OBSERVE

exp1 stdih

|             |            |            |          |
|-------------|------------|------------|----------|
| SAMPLE      |            | DEC. & VT  |          |
| date        | Jun 9 2011 | dfrq       | 399.996  |
| solvent     | CDC13      | dn         | H1       |
| file        | exp        | dpwr       | 30       |
| ACQUISITION |            | dof        | 0        |
| sfrq        | 399.997    | dm         | nnn      |
| tn          | H1         | dmm        | c        |
| at          | 1.999      | dmf        | 200      |
| np          | 25216      | dseq       |          |
| sw          | 6308.2     | dres       | 1.0      |
| fb          | 3600       | homo       | n        |
| bs          | 16         | PROCESSING |          |
| tpwr        | 58         | tb         | 0.20     |
| pw          | 10.0       | wfile      |          |
| d1          | 1.500      | proc       | ft       |
| tof         | 950.2      | fn         | not used |
| nt          | 120        | math       | f        |
| ct          | 64         |            |          |
| alock       | n          | werr       | react    |
| gain        | 20         | wexp       | procplot |
| FLAGS       |            | wbs        |          |
|             |            | wnt        |          |
| il          | n          |            |          |
| in          | n          |            |          |
| dp          | y          |            |          |
| hs          | nn         |            |          |
| DISPLAY     |            |            |          |
| sp          | -128.6     |            |          |
| wp          | 4699.8     |            |          |
| vs          | 204        |            |          |
| sc          | 0          |            |          |
| wc          | 250        |            |          |
| hzmm        | 18.80      |            |          |
| is          | 500.00     |            |          |
| rfl         | 194.8      |            |          |
| rfp         | 0          |            |          |
| th          | 3          |            |          |
| ins         | 1.000      |            |          |
| nm          | ph         |            |          |

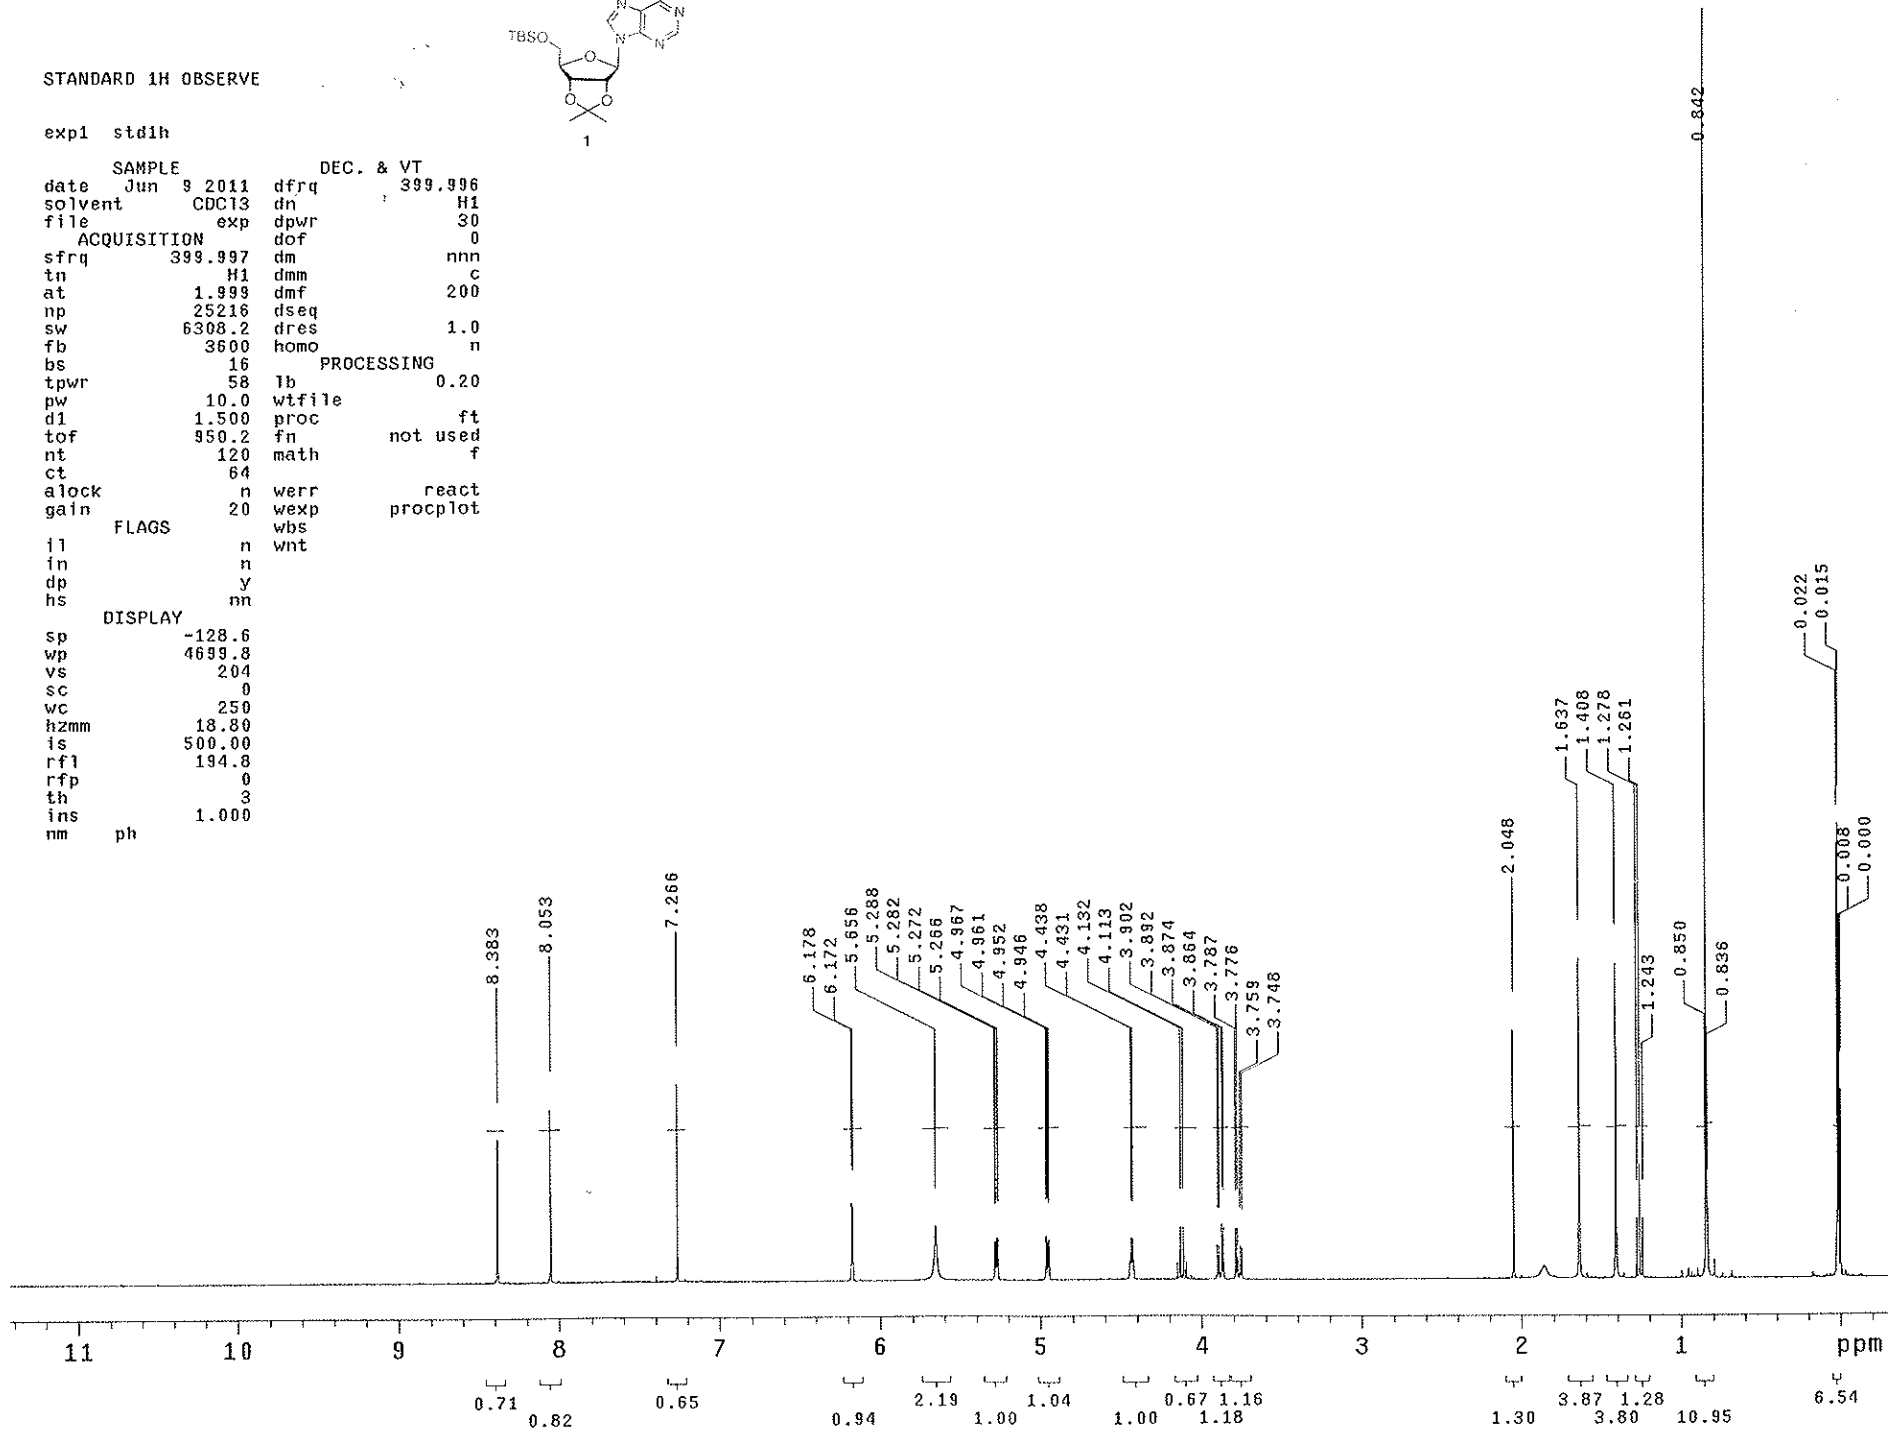

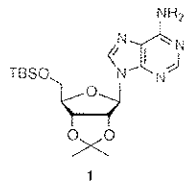

STANDARD 1H OBSERVE

expi std1h

|             |            |            |          |
|-------------|------------|------------|----------|
| SAMPLE      |            | DEC. & VT  |          |
| date        | Jun 9 2011 | dfrq       | 399.996  |
| solvent     | CDC13      | dn         | H1       |
| file        | exp        | dpwr       | 30       |
| ACQUISITION |            | dof        | 0        |
| sfrq        | 399.997    | dm         | nnn      |
| tn          | H1         | dmm        | c        |
| at          | 1.999      | dmf        | 200      |
| np          | 25216      | dseq       |          |
| sw          | 6308.2     | dres       | 1.0      |
| fb          | 3600       | homo       | n        |
| bs          | 16         | PROCESSING |          |
| tpwr        | 58         | lb         | 0.20     |
| pw          | 10.0       | wtfile     |          |
| d1          | 1.500      | proc       | ft       |
| tof         | 950.2      | fn         | not used |
| nt          | 120        | math       | f        |
| ct          | 64         |            |          |
| alock       | n          | werr       | react    |
| gain        | 20         | wexp       | procplot |
| FLAGS       |            | wbs        |          |
| il          | n          | wnt        |          |
| in          | n          |            |          |
| dp          | y          |            |          |
| hs          | nn         |            |          |
| DISPLAY     |            |            |          |
| sp          | -37.3      |            |          |
| wp          | 936.4      |            |          |
| vs          | 204        |            |          |
| sc          | 0          |            |          |
| wc          | 250        |            |          |
| hzmm        | 3.75       |            |          |
| is          | 500.00     |            |          |
| rfl         | 194.8      |            |          |
| rfp         | 0          |            |          |
| th          | 3          |            |          |
| ins         | 1.000      |            |          |
| nm          | ph         |            |          |

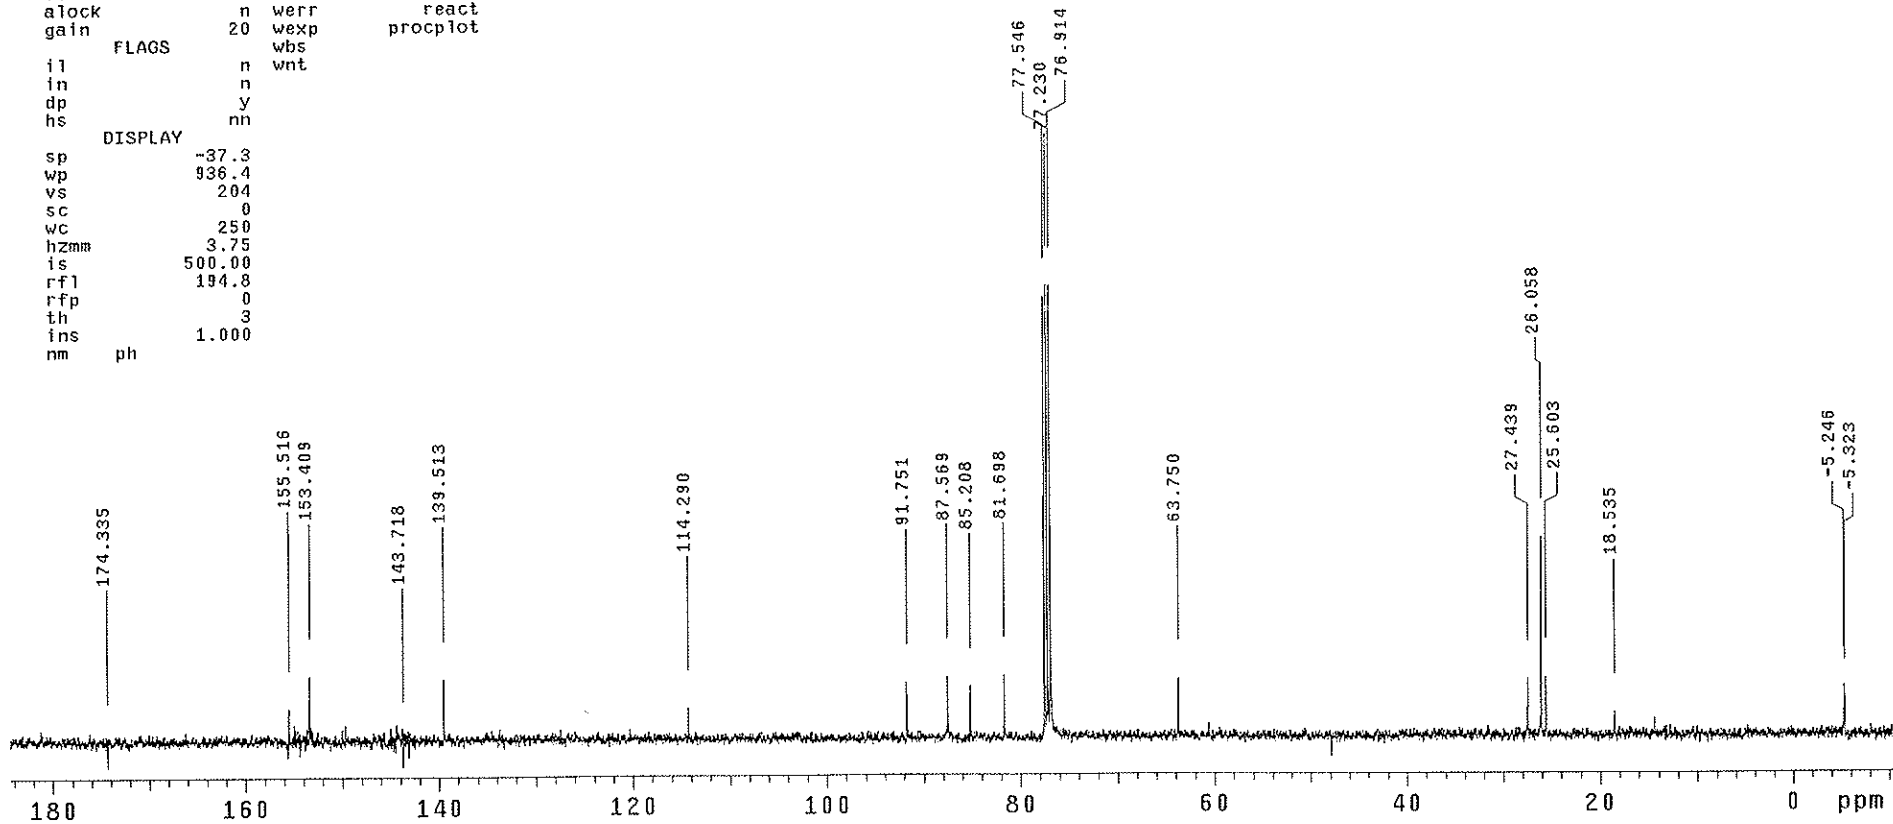

STANDARD 1H OBSERVE

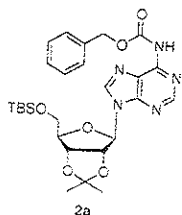

exp1 std1h

|             |             |            |          |
|-------------|-------------|------------|----------|
| SAMPLE      |             | DEC. & VT  |          |
| date        | Apr 19 2012 | dfrq       | 399.996  |
| solvent     | CDC13       | dn         | H1       |
| file        | exp         | dpwr       | 30       |
| ACQUISITION |             | dof        | 0        |
| sfrq        | 399.997     | dm         | nnn      |
| tn          | H1          | dmm        | c        |
| at          | 1.999       | dmf        | 200      |
| np          | 25216       | dseq       |          |
| sw          | 6308.2      | dres       | 1.0      |
| fb          | 3600        | homo       | n        |
| bs          | 16          | PROCESSING |          |
| tpwr        | 58          | lb         | 0.20     |
| pw          | 10.0        | wtfile     |          |
| d1          | 1.500       | proc       | ft       |
| tof         | 950.2       | fn         | not used |
| nt          | 120         | math       | f        |
| ct          | 80          |            |          |
| alock       | n           | werr       | react    |
| gain        | 20          | wexp       | procplot |
| FLAGS       |             | wbs        |          |
| il          | n           | wnt        |          |
| in          | n           |            |          |
| dp          | y           |            |          |
| hs          | nn          |            |          |
| DISPLAY     |             |            |          |
| sp          | -159.7      |            |          |
| wp          | 5130.7      |            |          |
| vs          | 147         |            |          |
| sc          | 0           |            |          |
| wc          | 250         |            |          |
| hzmm        | 20.52       |            |          |
| is          | 500.00      |            |          |
| rfl         | 3100.7      |            |          |
| rfp         | 2908.0      |            |          |
| th          | 2           |            |          |
| ins         | 1.000       |            |          |
| nm          | ph          |            |          |

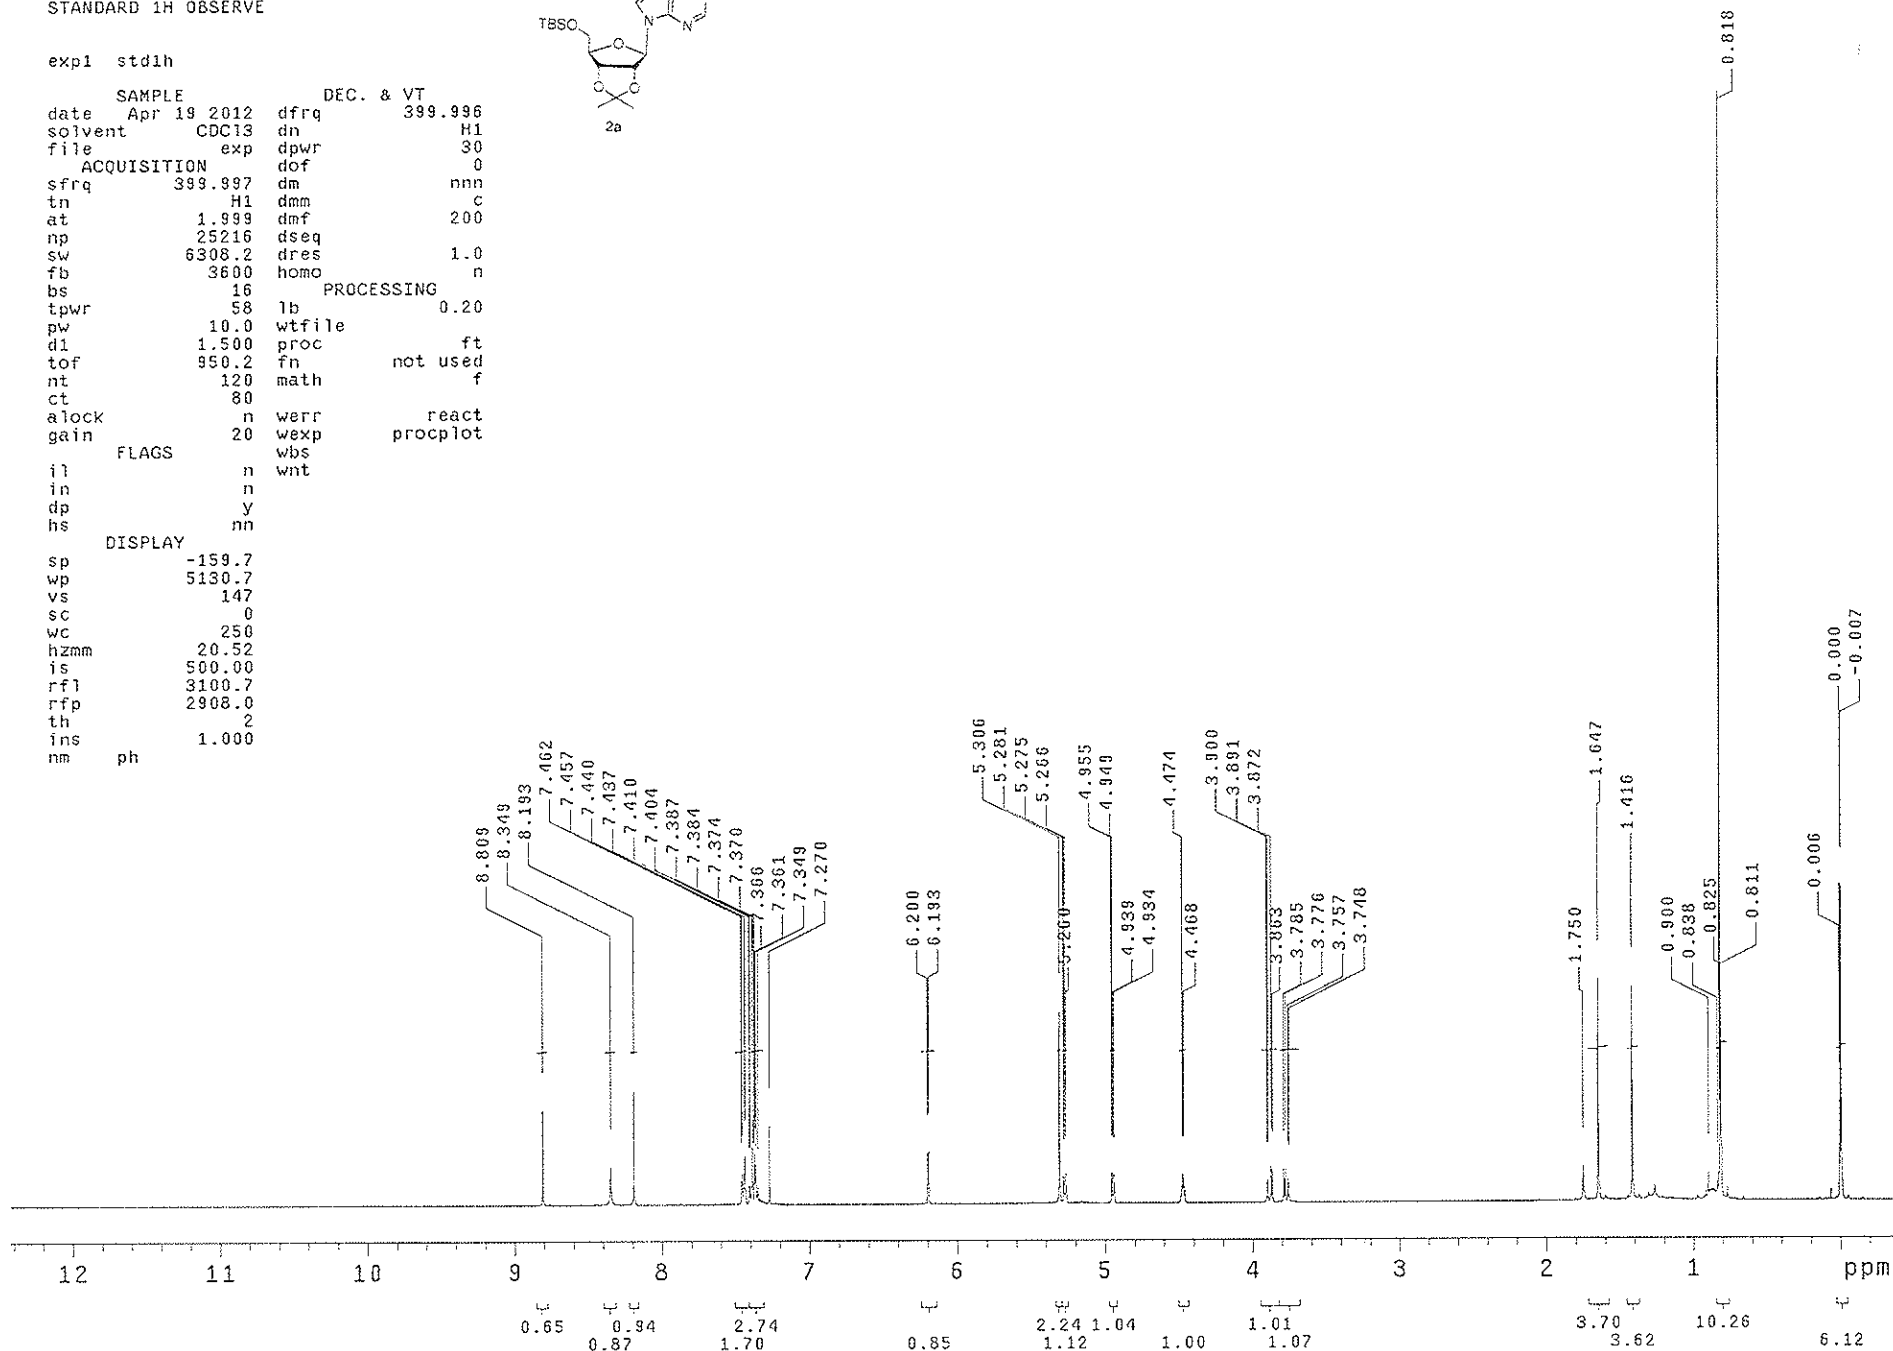

STANDARD 1H OBSERVE

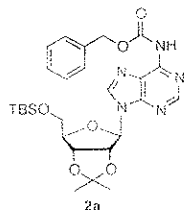

expl std1h

SAMPLE DEC. & VT  
 date Dec 28 2010 dfrq 399.996  
 solvent CDCl3 dn H1  
 file exp dpwr 30  
 ACQUISITION dof 0  
 sfrq 399.997 dm nnn  
 tn H1 dmm c  
 at 1.999 dmf 200  
 np 25216 dseq  
 sw 6308.2 dres 1.0  
 fb 3600 homo n  
 bs 16 PROCESSING  
 tpwr 58 lb 0.27  
 pw 10.0 wtfile  
 d1 1.500 proc  
 tof 950.2 fn not used  
 nt 40 math  
 ct 40  
 alock n werr rect  
 gain 20 wexp procpdt  
 wbs  
 wnt

FLAGS

il n  
 in n  
 dp y  
 hs nn

DISPLAY

sp -52.4  
 wp 936.4  
 vs 241  
 sc 0  
 wc 250  
 hzmm 3.75  
 is 500.0  
 rfl 153.4  
 rfp 149.5  
 th 150.0  
 ins 150.0  
 nm ph

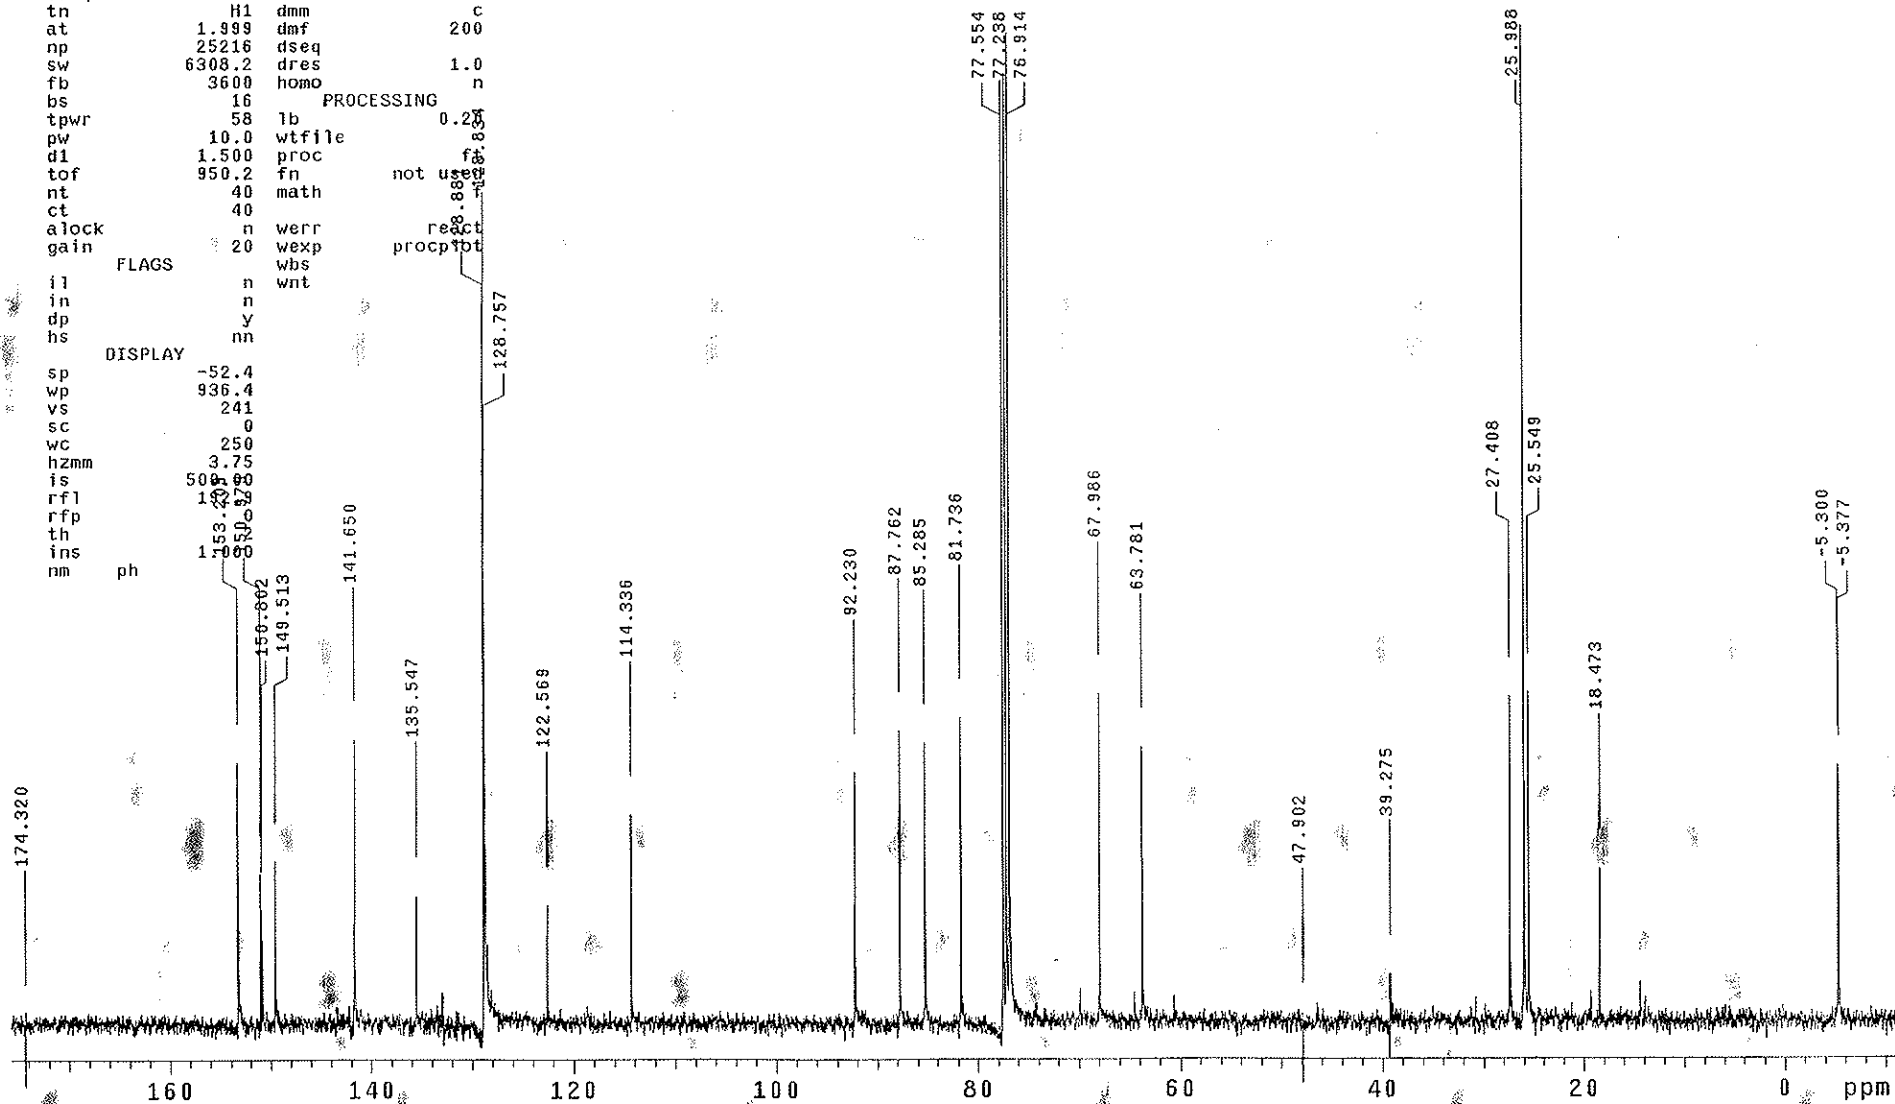

STANDARD 1H OBSERVE

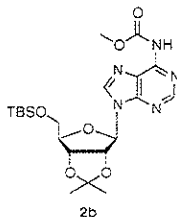

```

exp1 std1h
SAMPLE
date Apr 19 2012 dfrq DEC. & VT 399.996
solvent CDC13 dn H1
file exp dpwr 30
ACQUISITION dof 0
sfrq 399.997 dm nnn
tn H1 dmm c
at 1.999 dmf 200
np 25216 dseq
sw 6308.2 dres 1.0
fb 3600 homo n
bs 16
tpwr 58 lb PROCESSING 0.20
pw 10.0 wtfile
d1 1.500 proc ft
tof 950.2 fn not used
nt 120 math f
ct 120
alock n werr react
gain 20 wexp procp1ot
wbs
wnt
FLAGS
il n
in n
dp y
hs nn
DISPLAY
sp -176.2
wp 5064.5
vs 241
sc 0
wc 250
hzmm 20.26
is 500.00
rfi 3100.7
rfp 2908.0
th 3
ins 1.000
nm ph
    
```

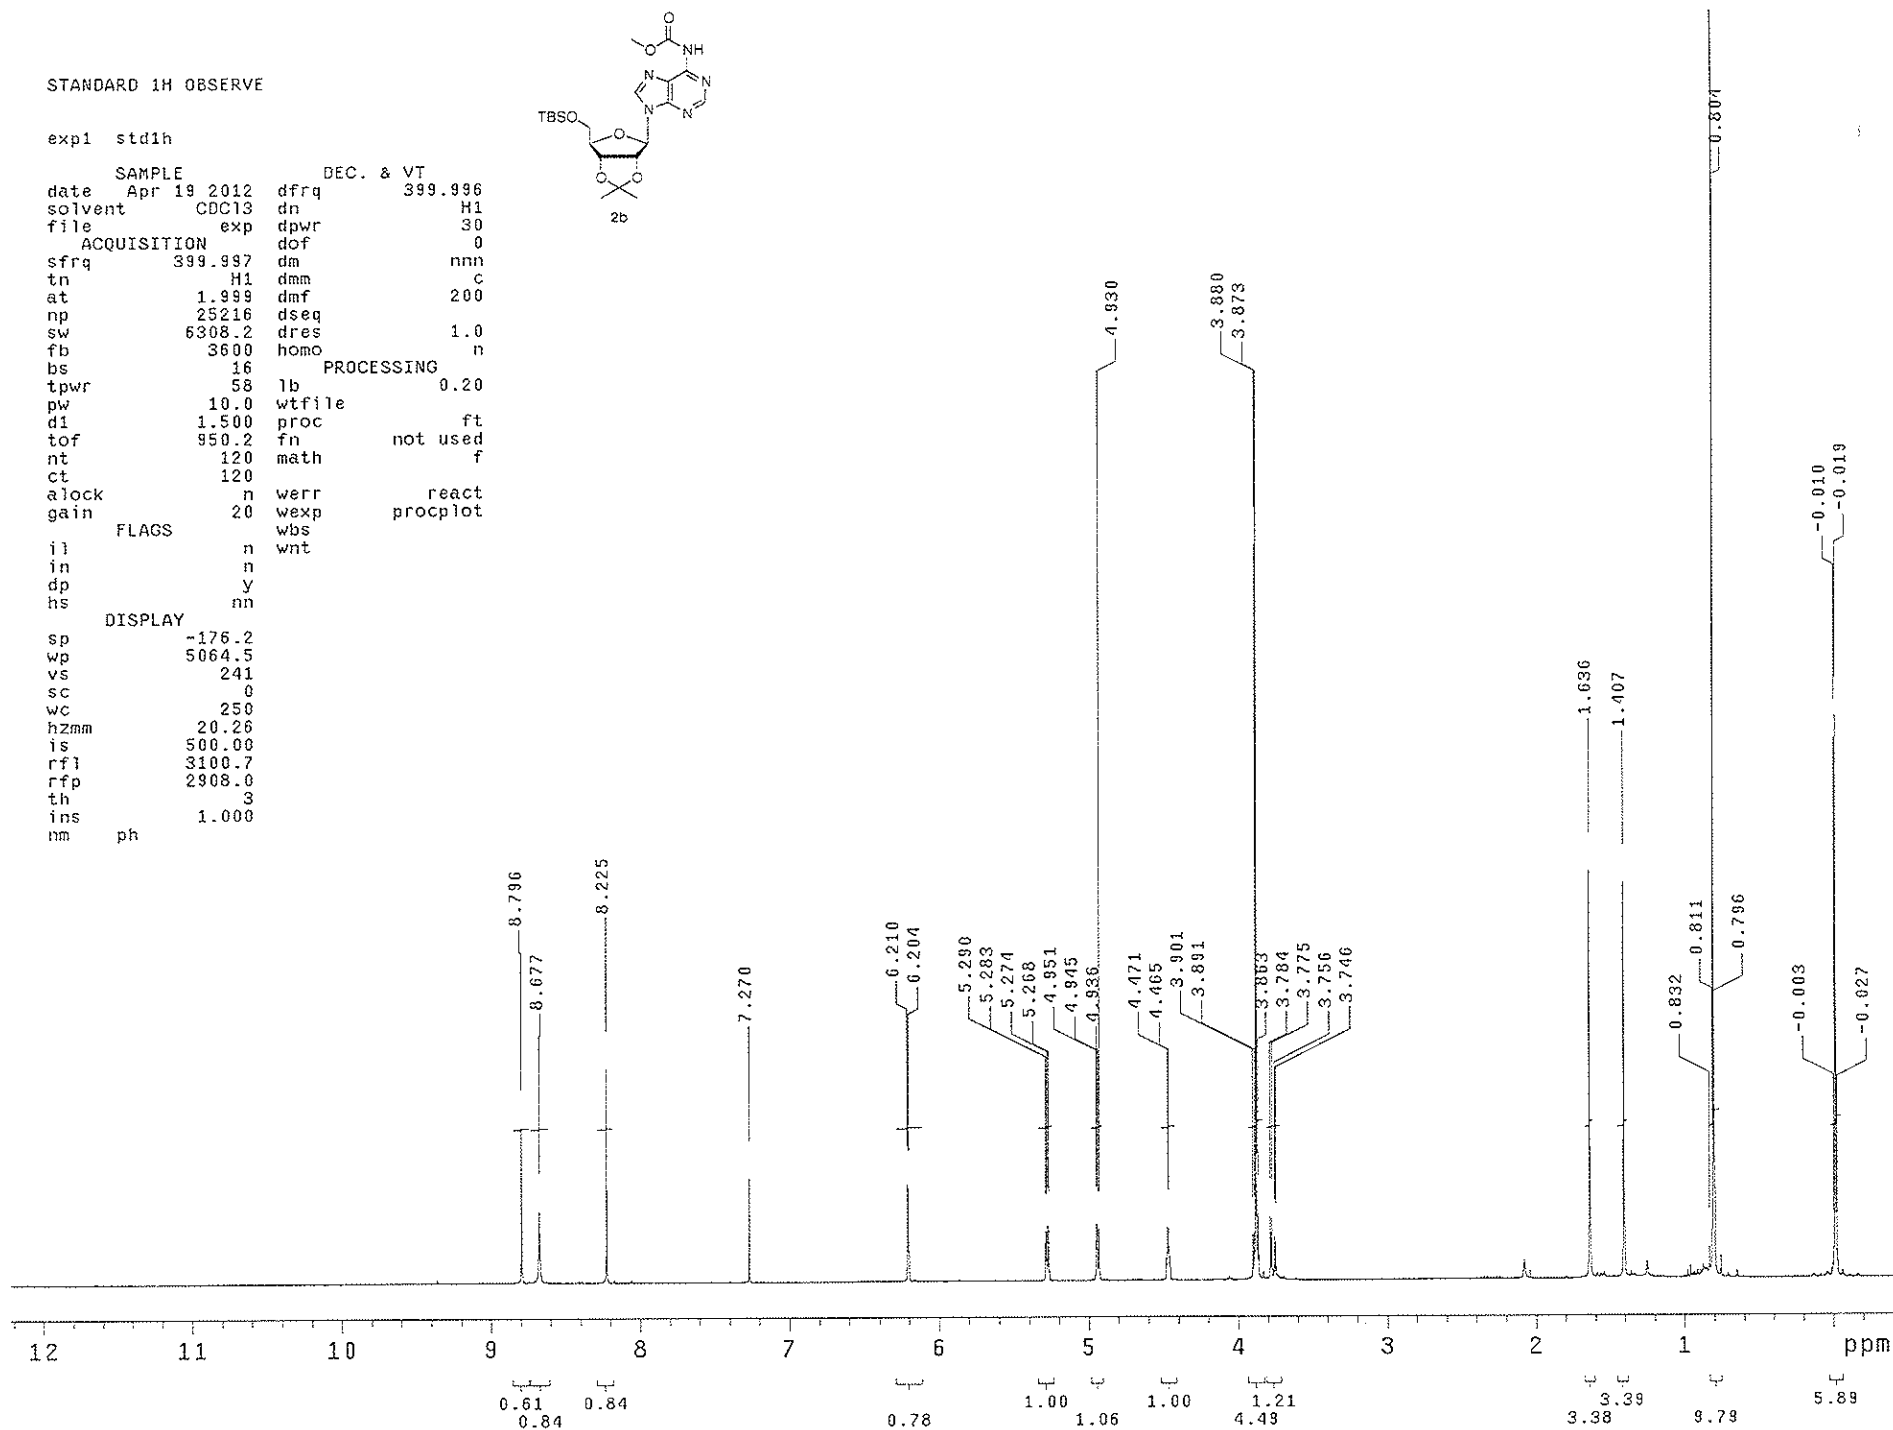

STANDARD 1H OBSERVE

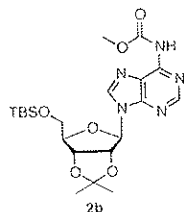

expi std1h

|             |             |            |          |
|-------------|-------------|------------|----------|
| SAMPLE      |             | DEC. & VT  |          |
| date        | Dec 30 2010 | dfrq       | 399.996  |
| solvent     | CDC13       | dn         | H1       |
| file        | exp         | dpwr       | 30       |
| ACQUISITION |             | dof        | 0        |
| sfrq        | 399.997     | dm         | nan      |
| tn          | H1          | dmm        | c        |
| at          | 1.999       | dmf        | 200      |
| np          | 25216       | dseq       |          |
| sw          | 6308.2      | dres       | 1.0      |
| fb          | 3600        | homo       | n        |
| bs          | 16          | PROCESSING |          |
| tpwr        | 58          | lb         | 0.20     |
| pw          | 10.0        | wtfile     |          |
| d1          | 1.500       | proc       | ft       |
| tof         | 950.2       | fn         | not used |
| nt          | 120         | math       | f        |
| ct          | 48          |            |          |
| alock       | n           | werr       | react    |
| gain        | 20          | wexp       | procplot |
| FLAGS       |             | wbs        |          |
| il          | n           | wnt        |          |
| in          | n           |            |          |
| dp          | y           |            |          |
| hs          | nn          |            |          |
| DISPLAY     |             |            |          |
| sp          | -76.5       |            |          |
| wp          | 1002.7      |            |          |
| vs          | 477         |            |          |
| sc          | 0           |            |          |
| wc          | 250         |            |          |
| hzmm        | 4.01        |            |          |
| is          | 500.00      |            |          |
| rfl         | 3100.4      |            |          |
| rfp         | 2908.0      |            |          |
| th          | 3           |            |          |
| ins         | 1.000       |            |          |
| nm          | ph          |            |          |

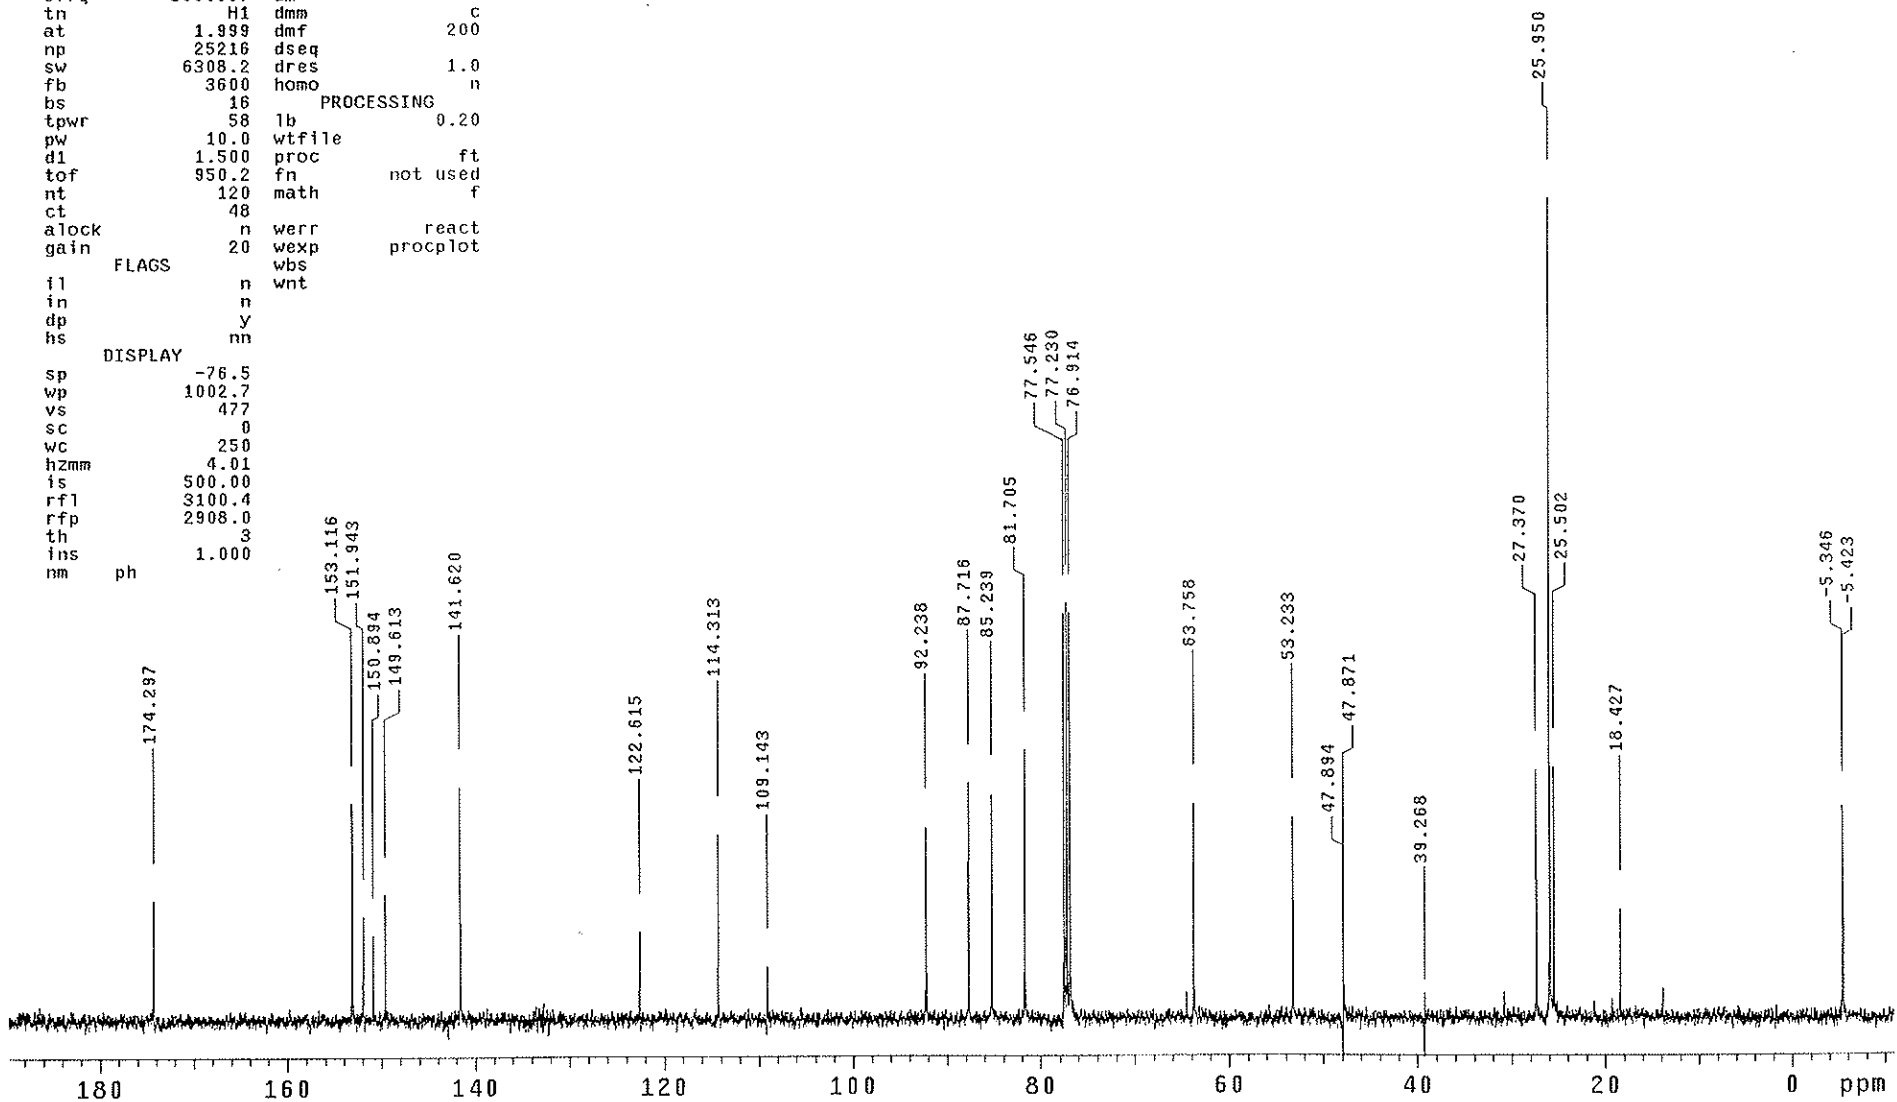

STANDARD 1H OBSERVE

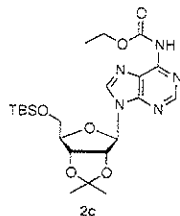

```

exp1 std1h
SAMPLE
date Apr 19 2012 dfrq 399.996
solvent CDC13 dn H1
file exp dpwr 30
ACQUISITION dof 0
sfrq 399.997 dm nnn
tn H1 dmm c
at 1.999 dmf 200
np 25216 dseq
sw 6308.2 dres 1.0
fb 3600 homo n
bs 16
tpwr 58 lb 0.20
pw 10.0 wtfile
d1 1.500 proc ft
tof 950.2 fn not used
nt 120 math f
ct 120
alock n werr react
gain 20 wexp procp1ot
FLAGS
i) n wnt
in n
dp y
hs nn
DISPLAY
sp -184.3
wp 5106.1
vs 161
sc 0
wc 250
hzmm 20.42
is 500.00
rfl 3100.4
rfp 2308.0
th 2
ins 1.000
nm ph
    
```

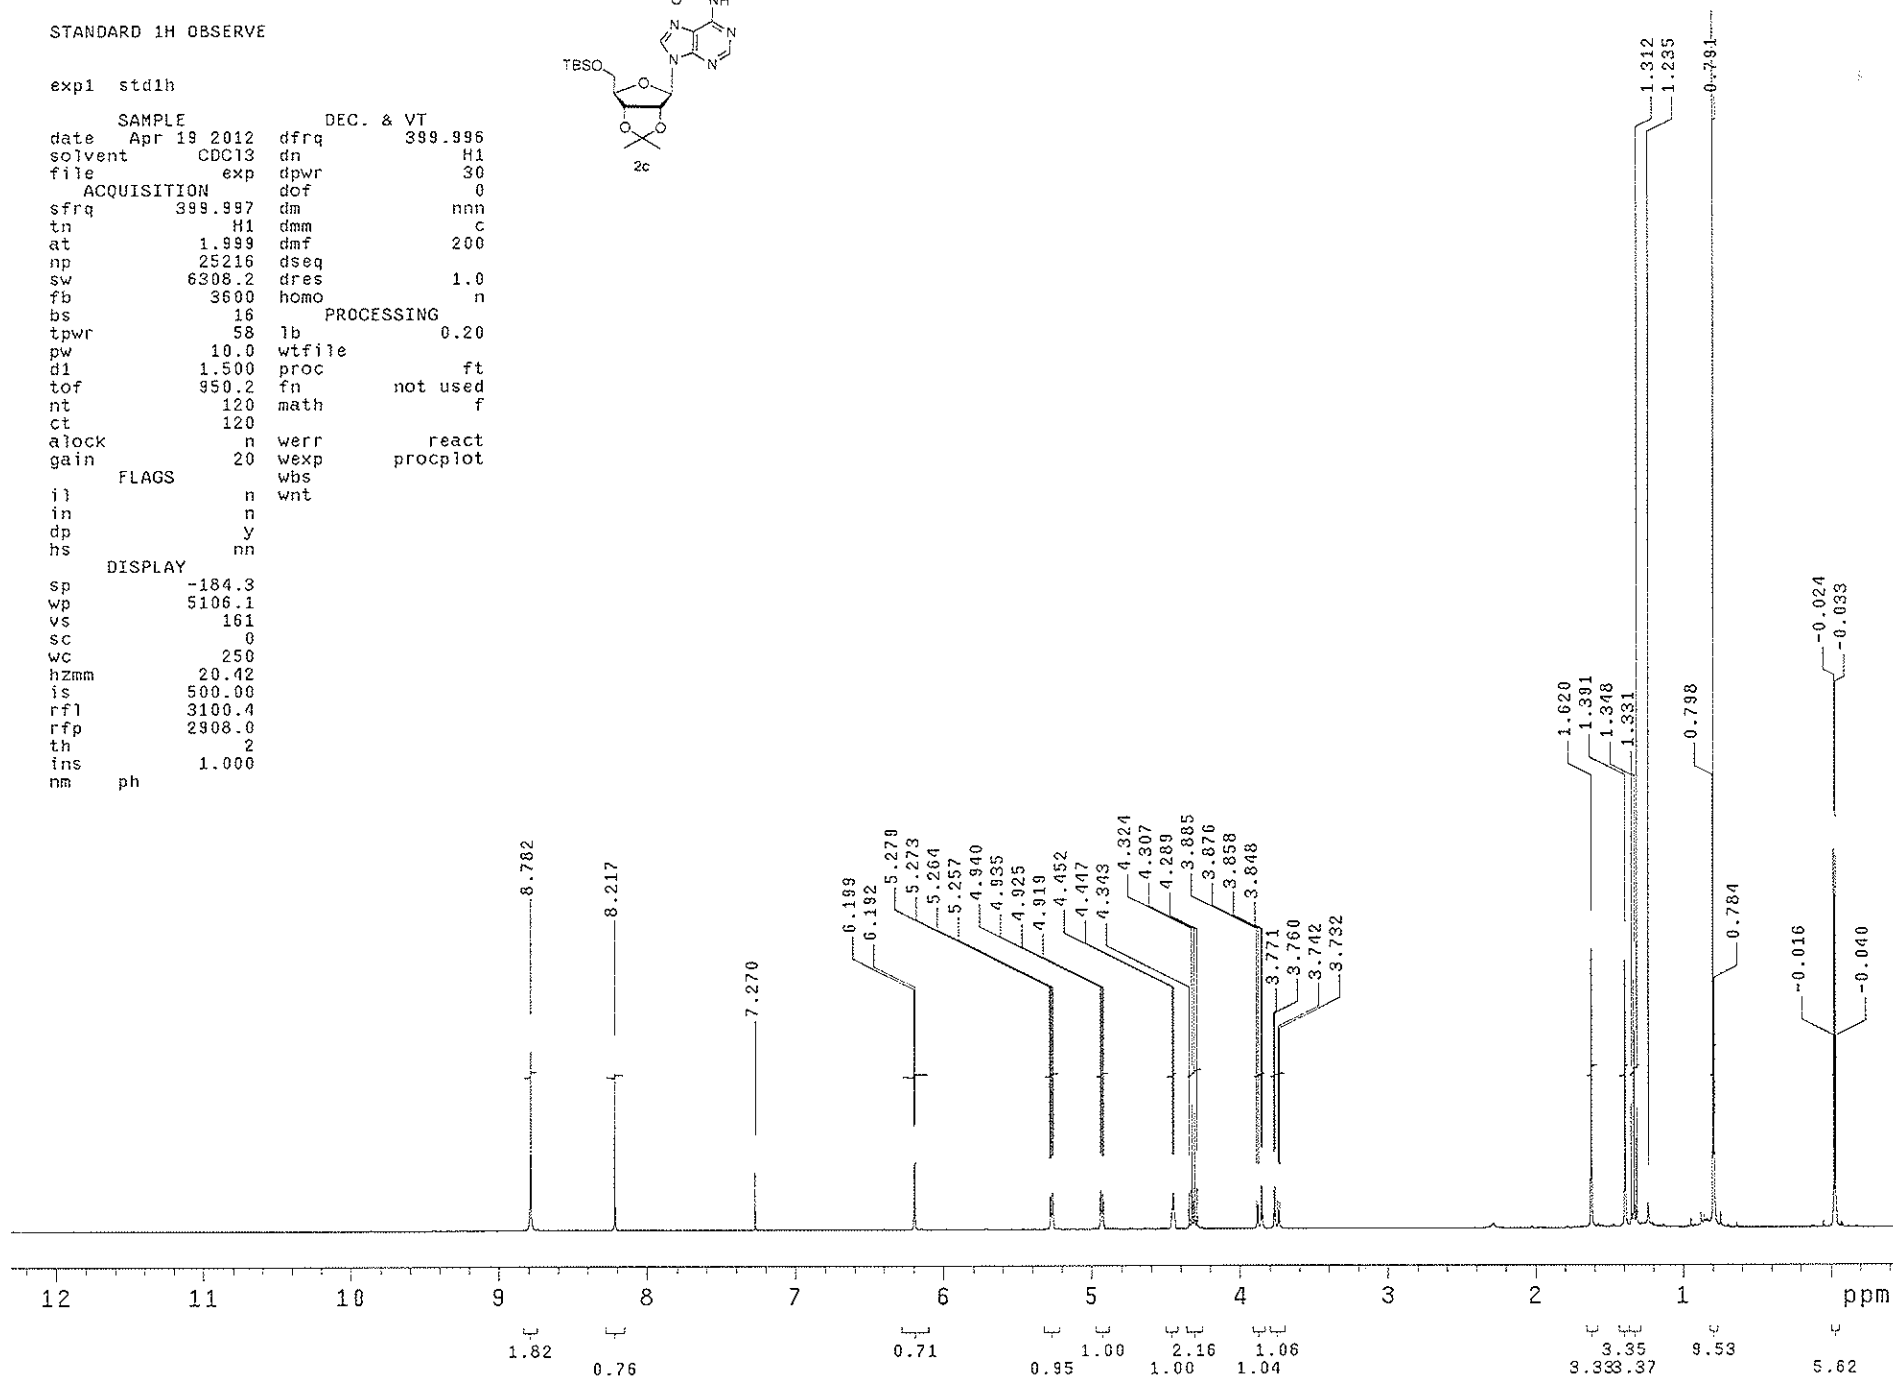

C13 STD

exp1 std1h

SAMPLE DEC. & VT  
date Dec 30 2010 dffrq 399.996  
solvent CDC13 dn H1  
file exp dpwr 40  
ACQUISITION dof -363.0  
sfrq 100.590 dm yyy  
tn C13 dmm w  
at 1.599 dmf 9000  
np 81344 dseq  
sw 25429.1 dres 1.0  
fb 14000 homo n  
bs 16 PROCESSING  
tpwr 58 lb 2.00  
pw 6.0 wtfile  
d1 4.000 proc ft  
tof 1659.9 fn 65536  
nt 800 math f  
ct 336  
alock n werr react  
gain 20 wexp proplot  
FLAGS wbs testsn  
wnt  
DISPLAY  
sp -1107.3  
wp 19580.7  
vs 75582  
sc 0  
wc 250  
hzmm 78.32  
is 500.00  
rf1 9308.8  
rfp 7767.7  
th 7  
ins 100.000  
al ph

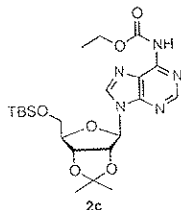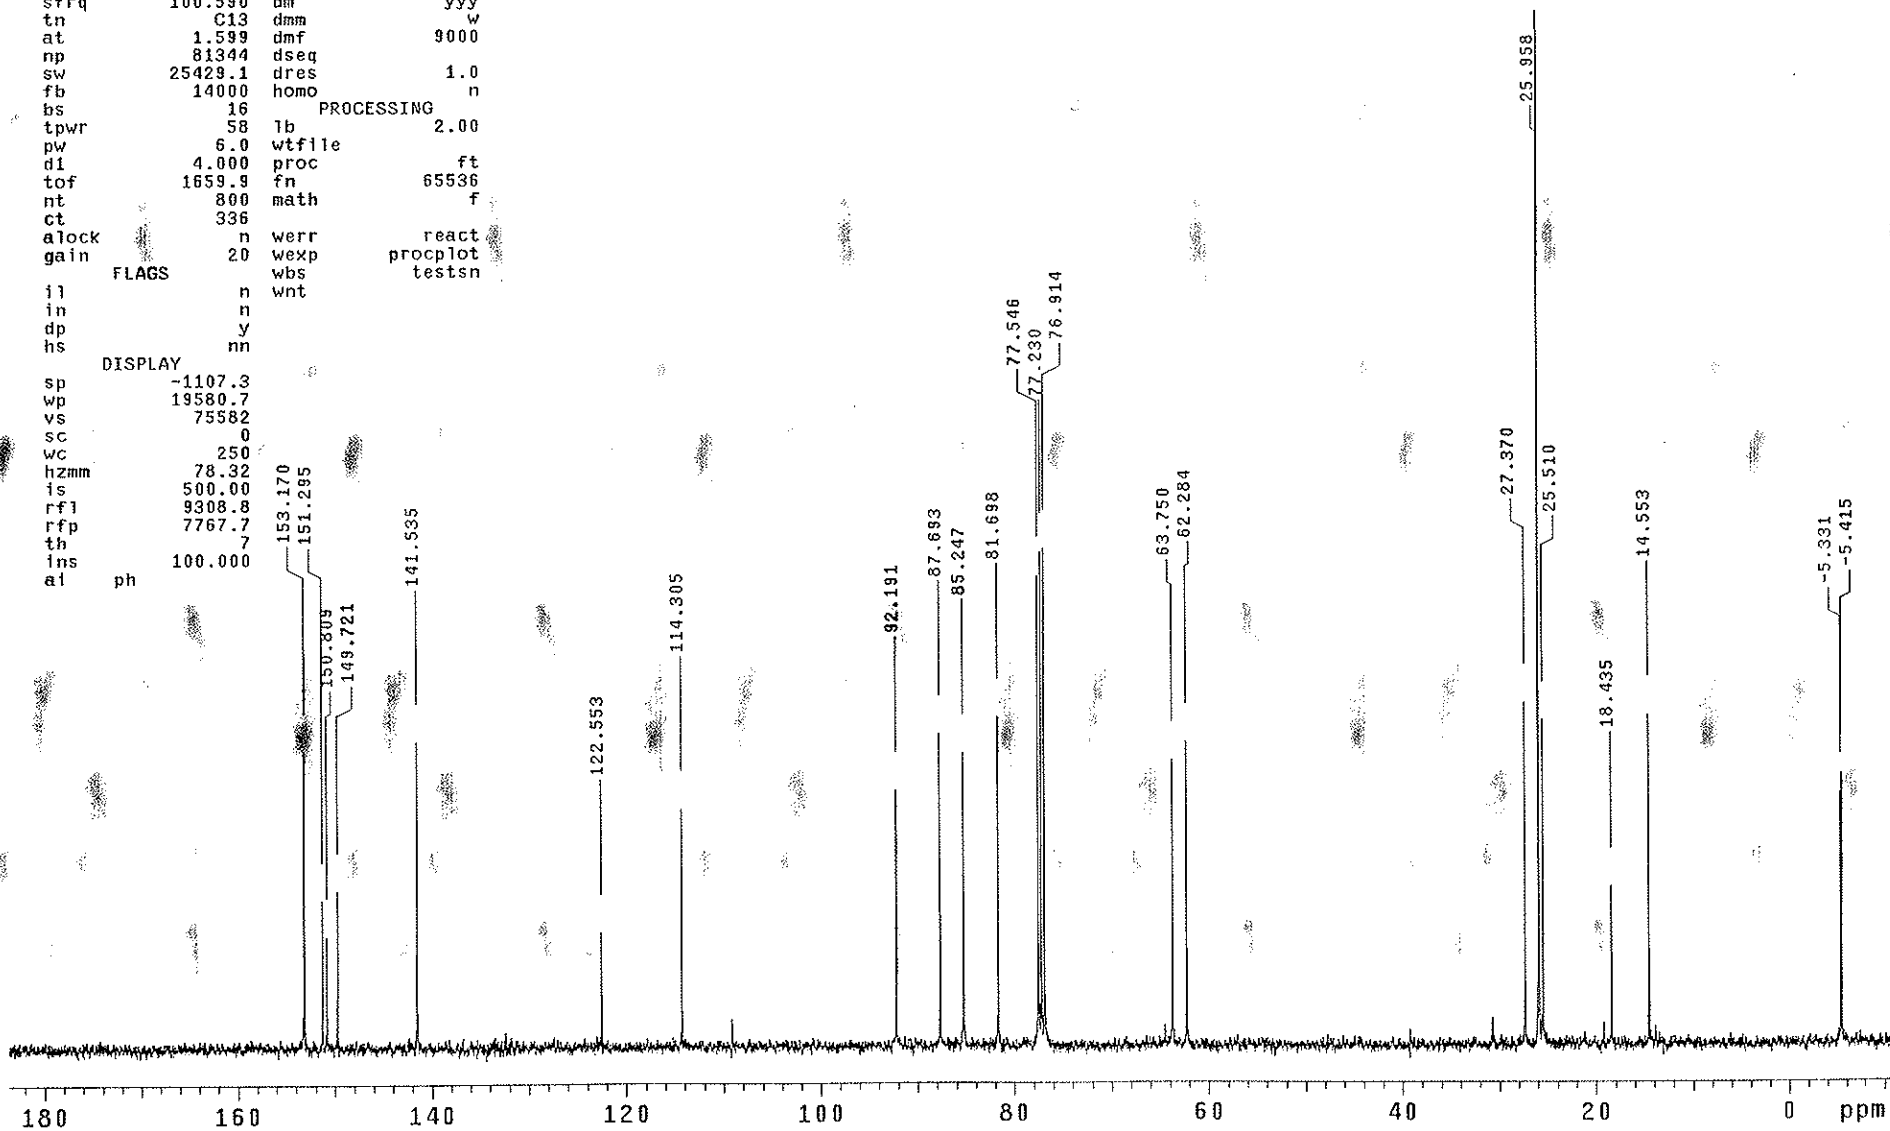



STANDARD 1H OBSERVE

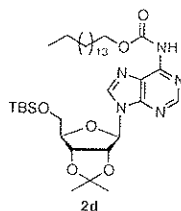

exp1 std1h

SAMPLE DEC. & VT  
 date Jan 8 2011 dfrq 399.996  
 solvent CDC13 dn H1  
 file exp dpwr 30  
 ACQUISITION dof 0  
 sfrq 399.997 dm nnn  
 tn H1 dmm c  
 at 1.999 dmf 200  
 np 25216 dseq  
 sw 6308.2 dres 1.0  
 fb 3600 homo n  
 bs 16  
 tpwr 58 lb 0.20  
 pw 10.0 wfile  
 dl 1.500 proc ft  
 tof 950.2 fn not used  
 nt 200 math f  
 ct 64  
 alock n werr react  
 gain 20 wexp procplot  
 FLAGS  
 il n wnt  
 in n  
 dp y  
 hs nn  
 DISPLAY  
 sp -134.6  
 wp 4674.8  
 vs 383  
 sc 0  
 wc 250  
 hzmm 18.70  
 is 500.00  
 rfl 3100.4  
 rfp 2908.0  
 th 3  
 ins 1.000  
 nm ph

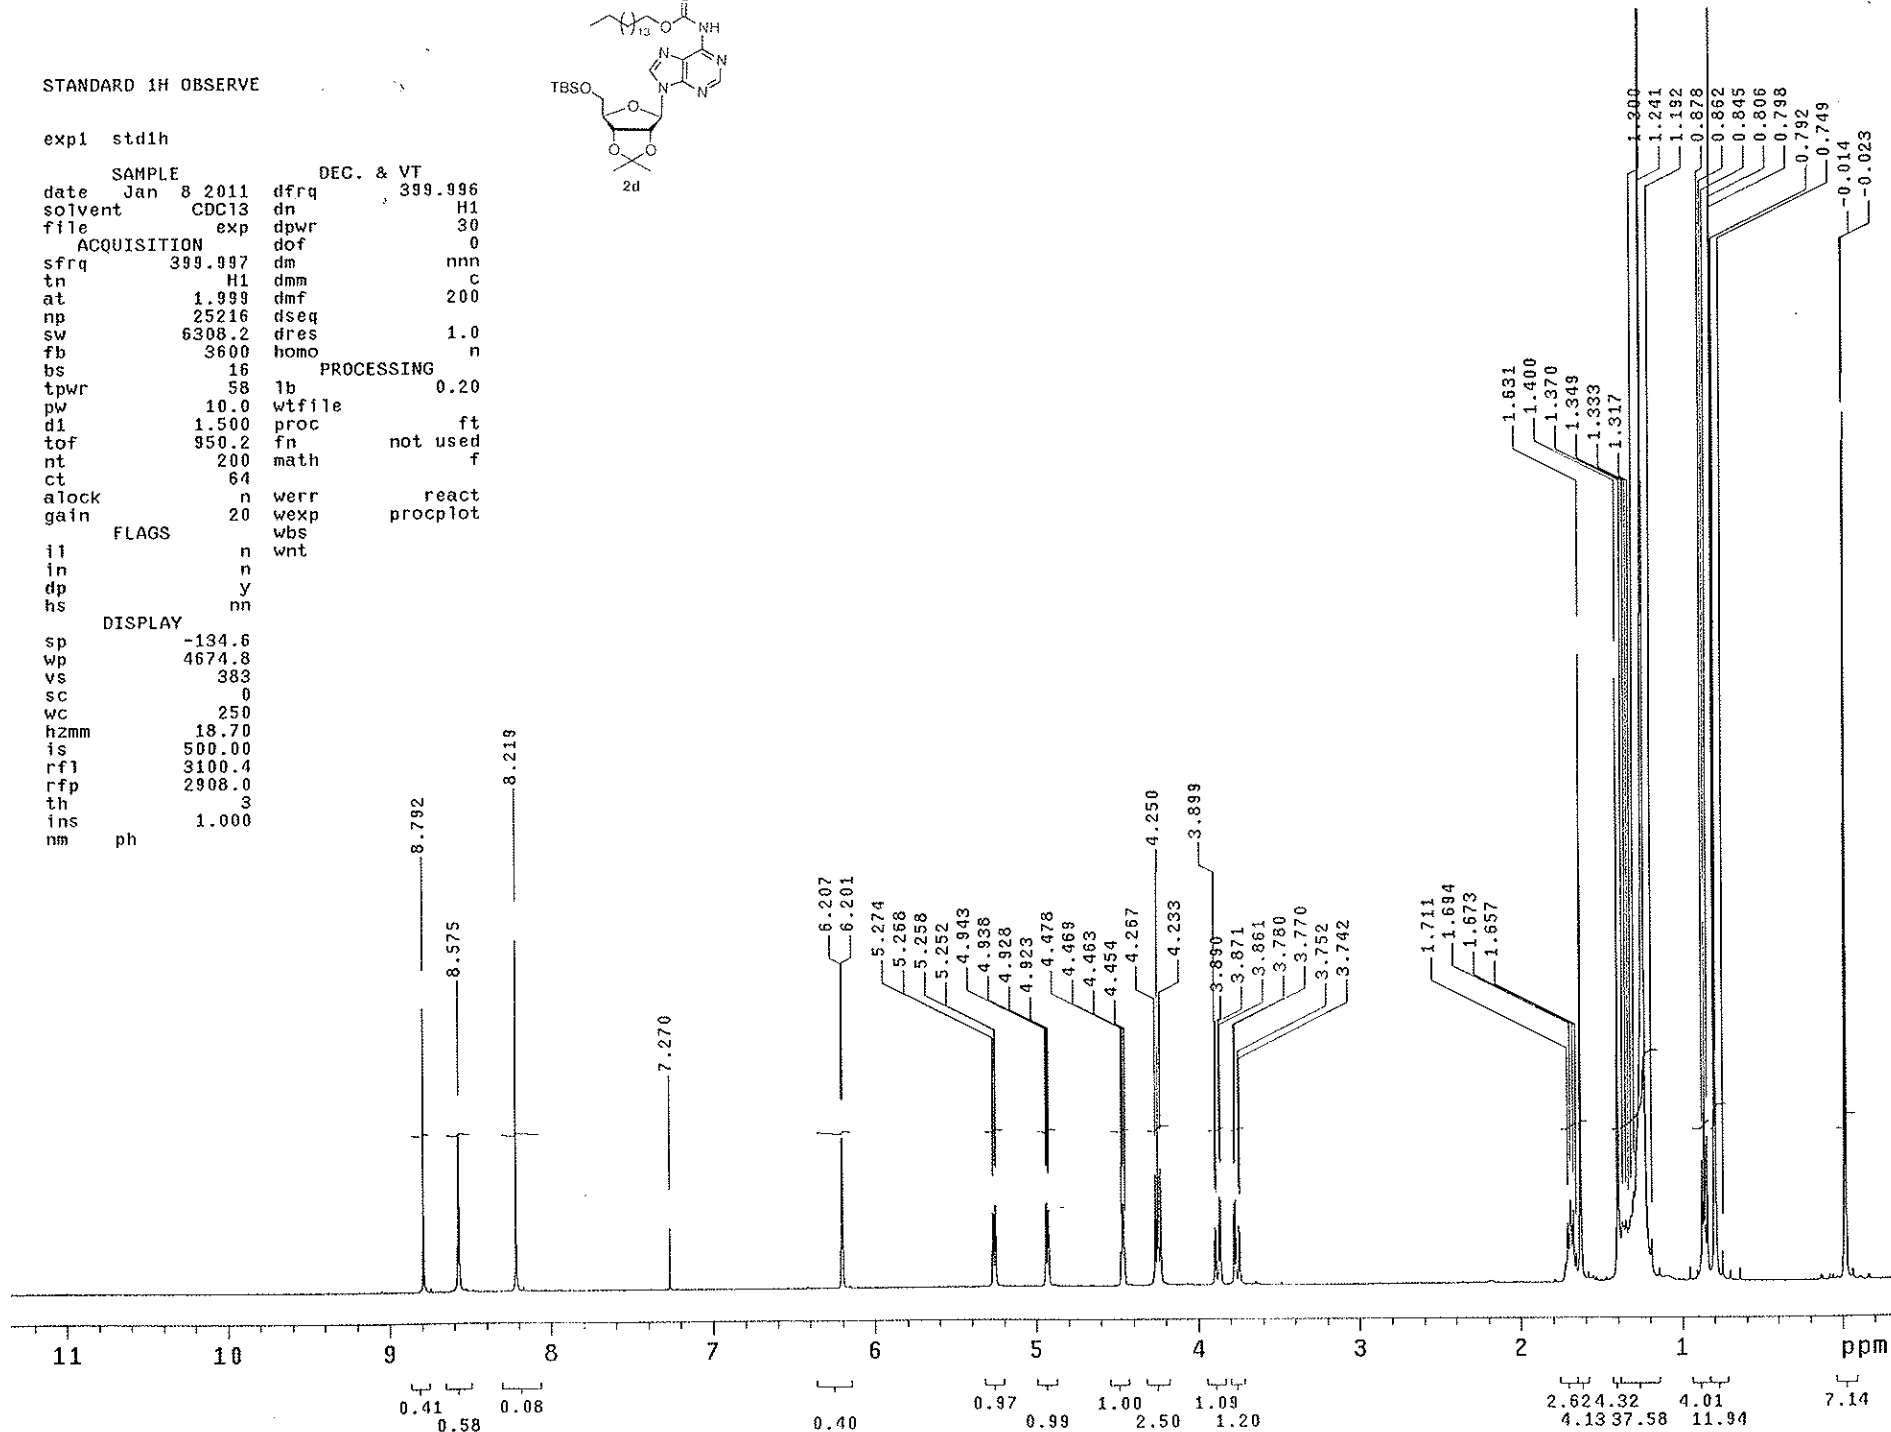

C13 STD

exp1 std1h

SAMPLE DEC. & VT  
date Jan 8 2011 dfrq 399.996  
solvent CDC13 dn H1  
file exp dpwr 40  
ACQUISITION dof -363.0  
sfrq 100.590 dm yyy  
tn C13 dmm w  
at 1.599 dmf 9000  
np 81344 dseq  
sw 25429.1 dres 1.0  
fb 14000 homo n  
bs 16 PROCESSING  
tpwr 58 lb 2.00  
pw 6.0 wtfile  
dl 4.000 proc ft  
tof 1659.9 fn 65536  
nt 1200 math f  
ct 912  
alock n werr react  
gain 20 wexp proplot  
FLAGS wbs testsn  
wnt  
il n  
in n  
dp y  
hs nn  
DISPLAY  
sp -1139.9  
wp 18578.8  
vs 69544  
sc 0  
wc 250  
hzmm 74.32  
is 500.00  
rfl 9308.0  
rfp 7767.7  
th 4  
ins 1000  
ai ph 153.7  
151.3  
150.771  
149.706  
141.473  
122.484  
114.313  
92.191  
87.701  
85.278  
81.698  
77.546  
77.230  
76.906  
66.420  
63.758  
39.268  
32.084  
25.510  
22.856  
18.450  
14.299  
-5.323  
-5.408

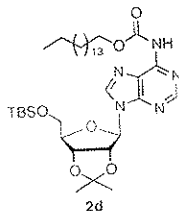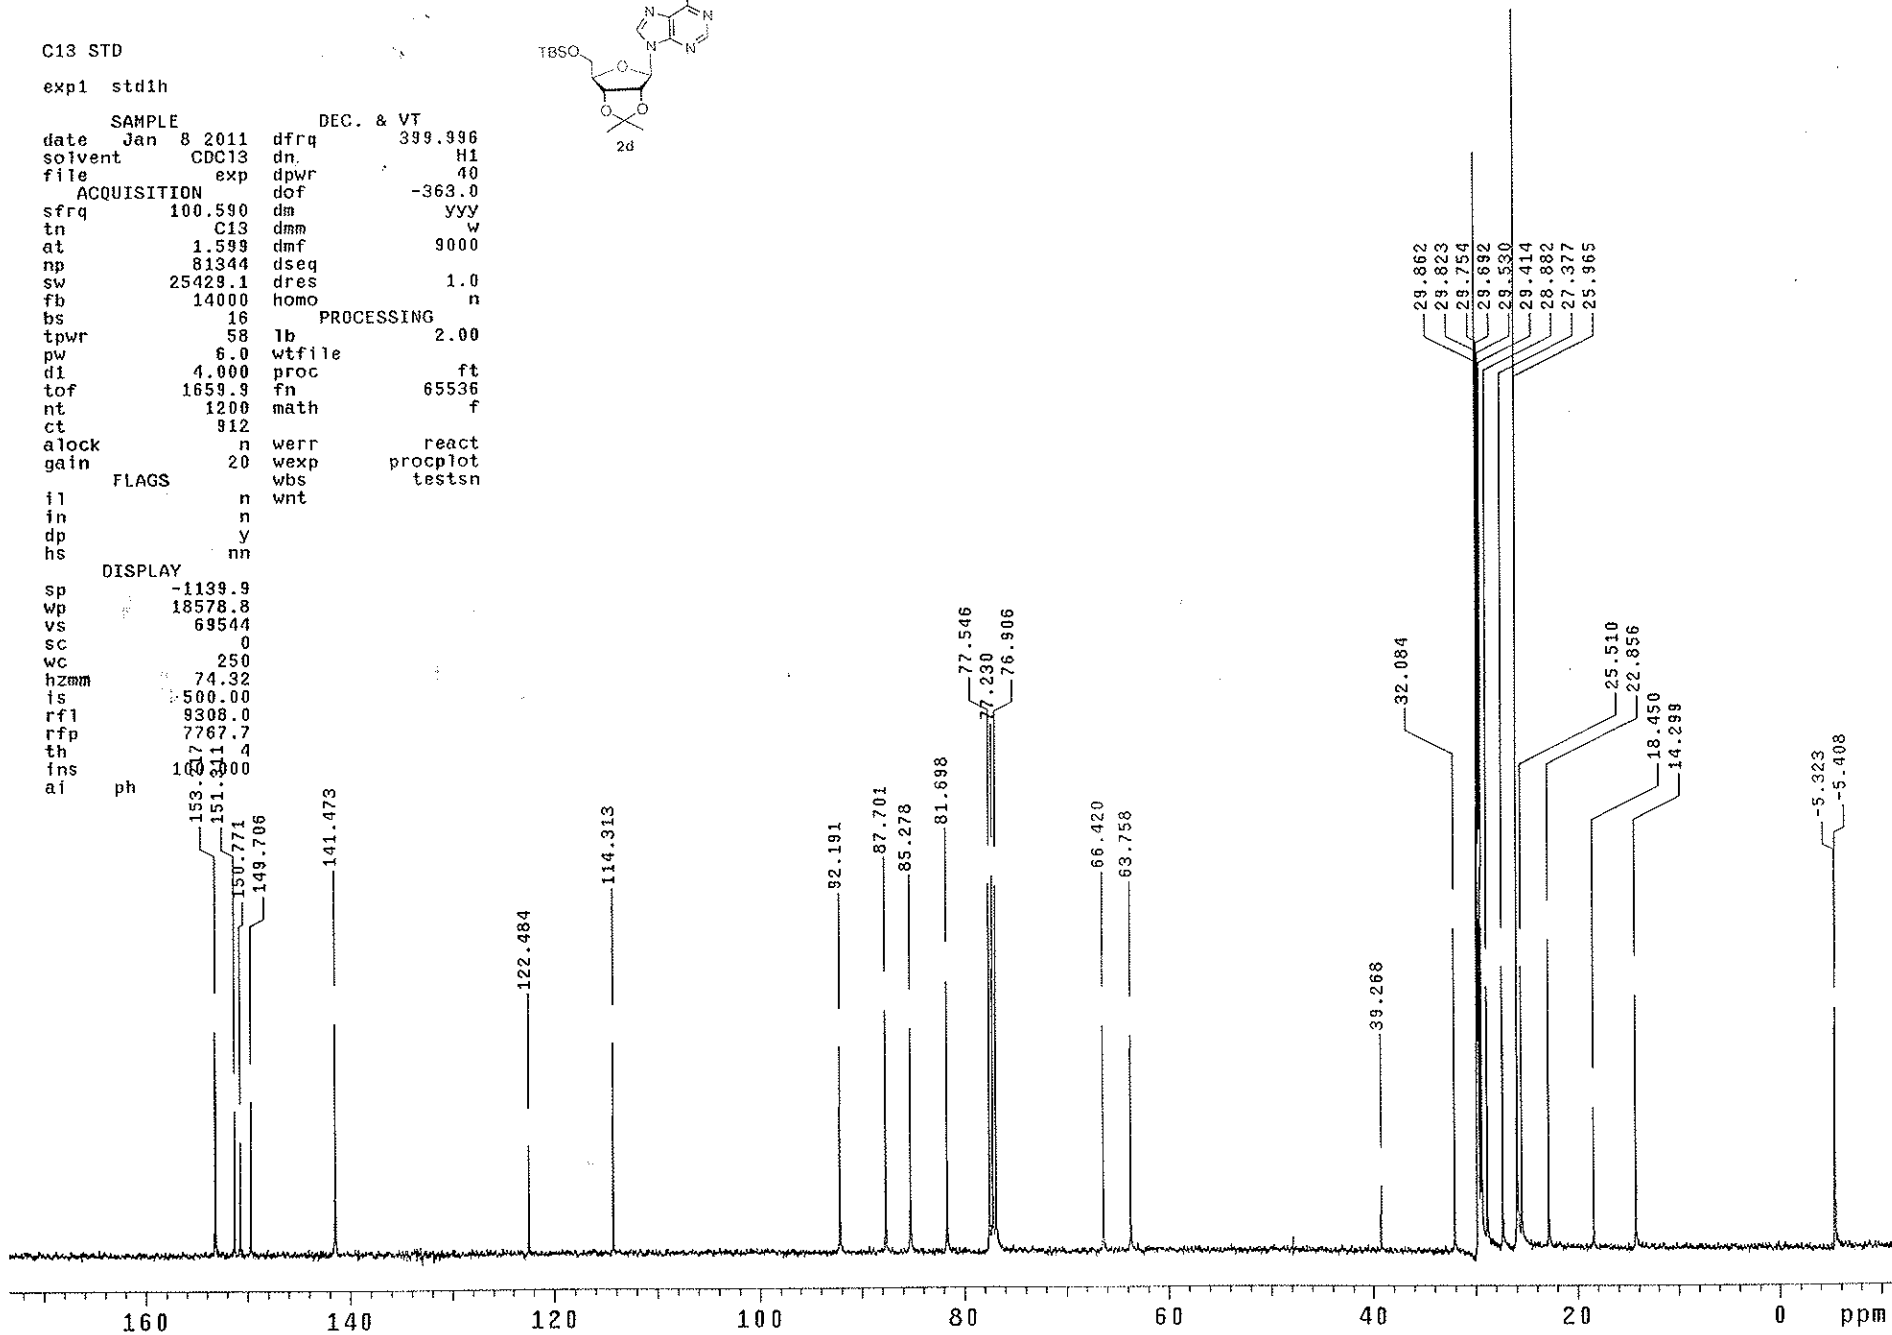

STANDARD 1H OBSERVE

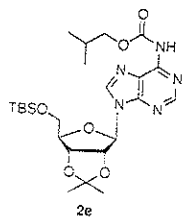

exp1 stdih

|             |             |            |          |
|-------------|-------------|------------|----------|
| SAMPLE      |             | DEC. & VT  |          |
| date        | Apr 19 2012 | dfrq       | 399.996  |
| solvent     | CDC13       | dn         | H1       |
| file        | exp         | dpwr       | 30       |
| ACQUISITION |             | dof        | 0        |
| sfrq        | 399.997     | dm         | nnn      |
| tn          | H1          | dmm        | C        |
| at          | 1.999       | dmf        | 200      |
| np          | 25216       | dseq       |          |
| sw          | 6308.2      | dres       | 1.0      |
| fb          | 3600        | homo       | n        |
| bs          | 16          | PROCESSING |          |
| tpwr        | 58          | lb         | 0.20     |
| pw          | 10.0        | wfile      |          |
| d1          | 1.500       | proc       | ft       |
| tof         | 950.2       | fn         | not used |
| nt          | 120         | math       | f        |
| ct          | 120         |            |          |
| alock       | n           | werr       | react    |
| gain        | 20          | wexp       | procp1ot |
| FLAGS       |             | wbs        |          |
| il          | n           | wnt        |          |
| in          | n           |            |          |
| dp          | y           |            |          |
| hs          | nn          |            |          |
| DISPLAY     |             |            |          |
| sp          | -151.6      |            |          |
| wp          | 5039.8      |            |          |
| vs          | 161         |            |          |
| sc          | 0           |            |          |
| wc          | 250         |            |          |
| hzmm        | 20.16       |            |          |
| is          | 500.00      |            |          |
| rfl         | 3100.7      |            |          |
| rfp         | 2908.0      |            |          |
| th          | 2           |            |          |
| ins         | 1.000       |            |          |
| nm          | ph          |            |          |

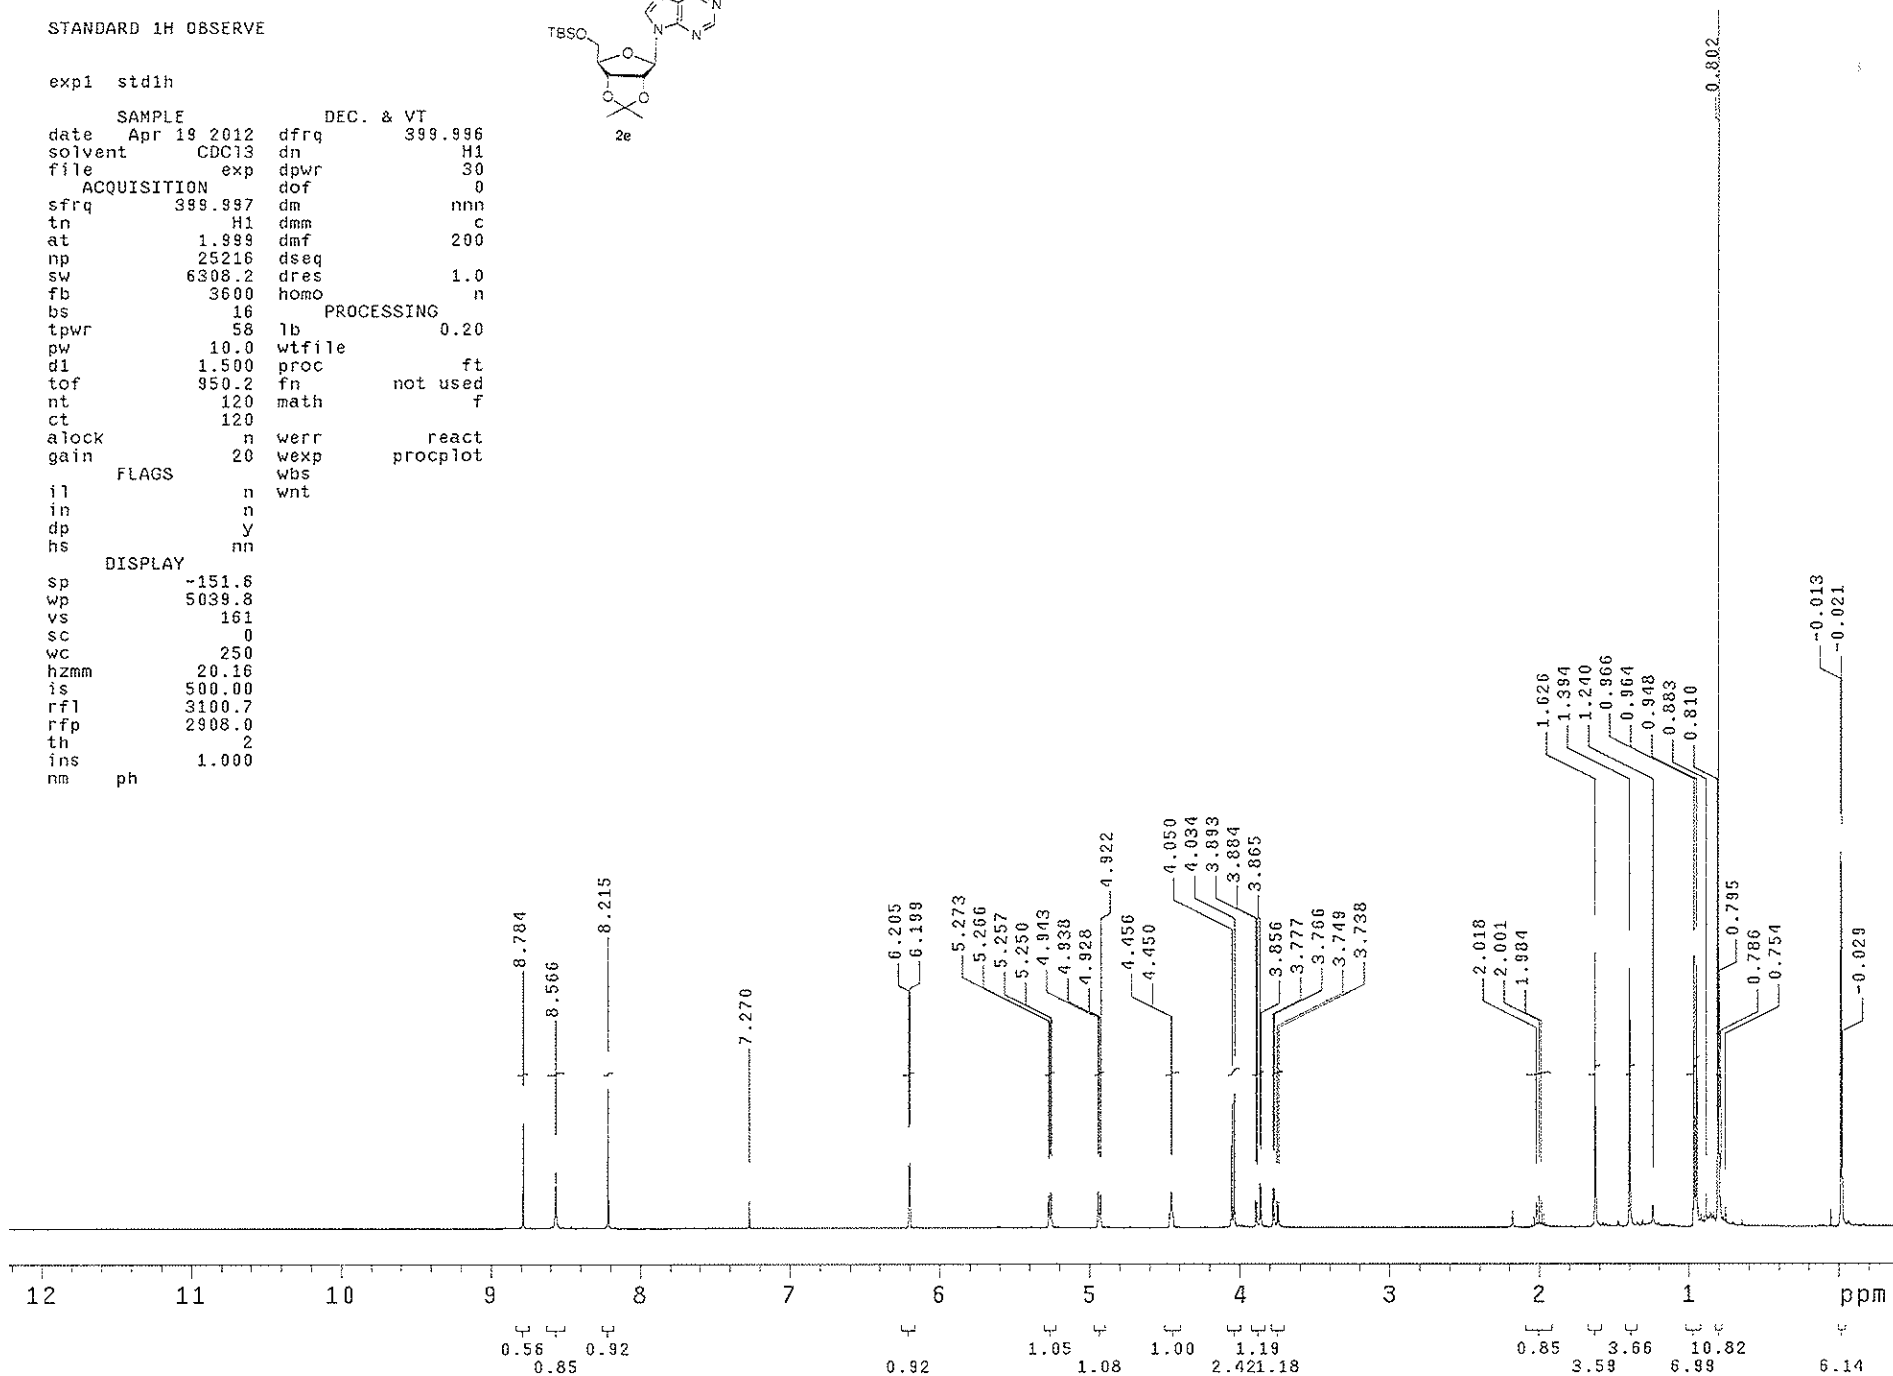

STANDARD 1H OBSERVE

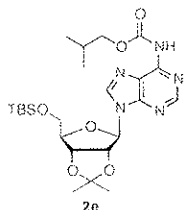

expl std1h

SAMPLE DEC. & VT  
 date Dec 30 2010 dfrq 399.996  
 solvent CDCl3 dn H1  
 file exp dpwr 30  
 ACQUISITION dof 0  
 sfrq 399.997 dm nnn  
 tn H1 dmm c  
 at 1.999 dmf 200  
 np 25216 dseq  
 sw 6308.2 dres 1.0  
 fb 3600 homo n  
 bs 16  
 tpwr 58 1b PROCESSING 0.20  
 pw 10.0 wtfile  
 d1 1.500 proc ft  
 tof 950.2 fn not used  
 nt 120 math f  
 ct 120  
 alock n werr react  
 gain 20 wexp procplot

FLAGS  
 il n  
 in n  
 dp y  
 hs nn

DISPLAY  
 sp -60.0  
 wp 911.8  
 vs 300  
 sc 0  
 wc 250  
 hzmm 3.65  
 is 500.00  
 rfl 3100.4  
 rfp 2808.0  
 th 2  
 ins 1.000  
 nm ph

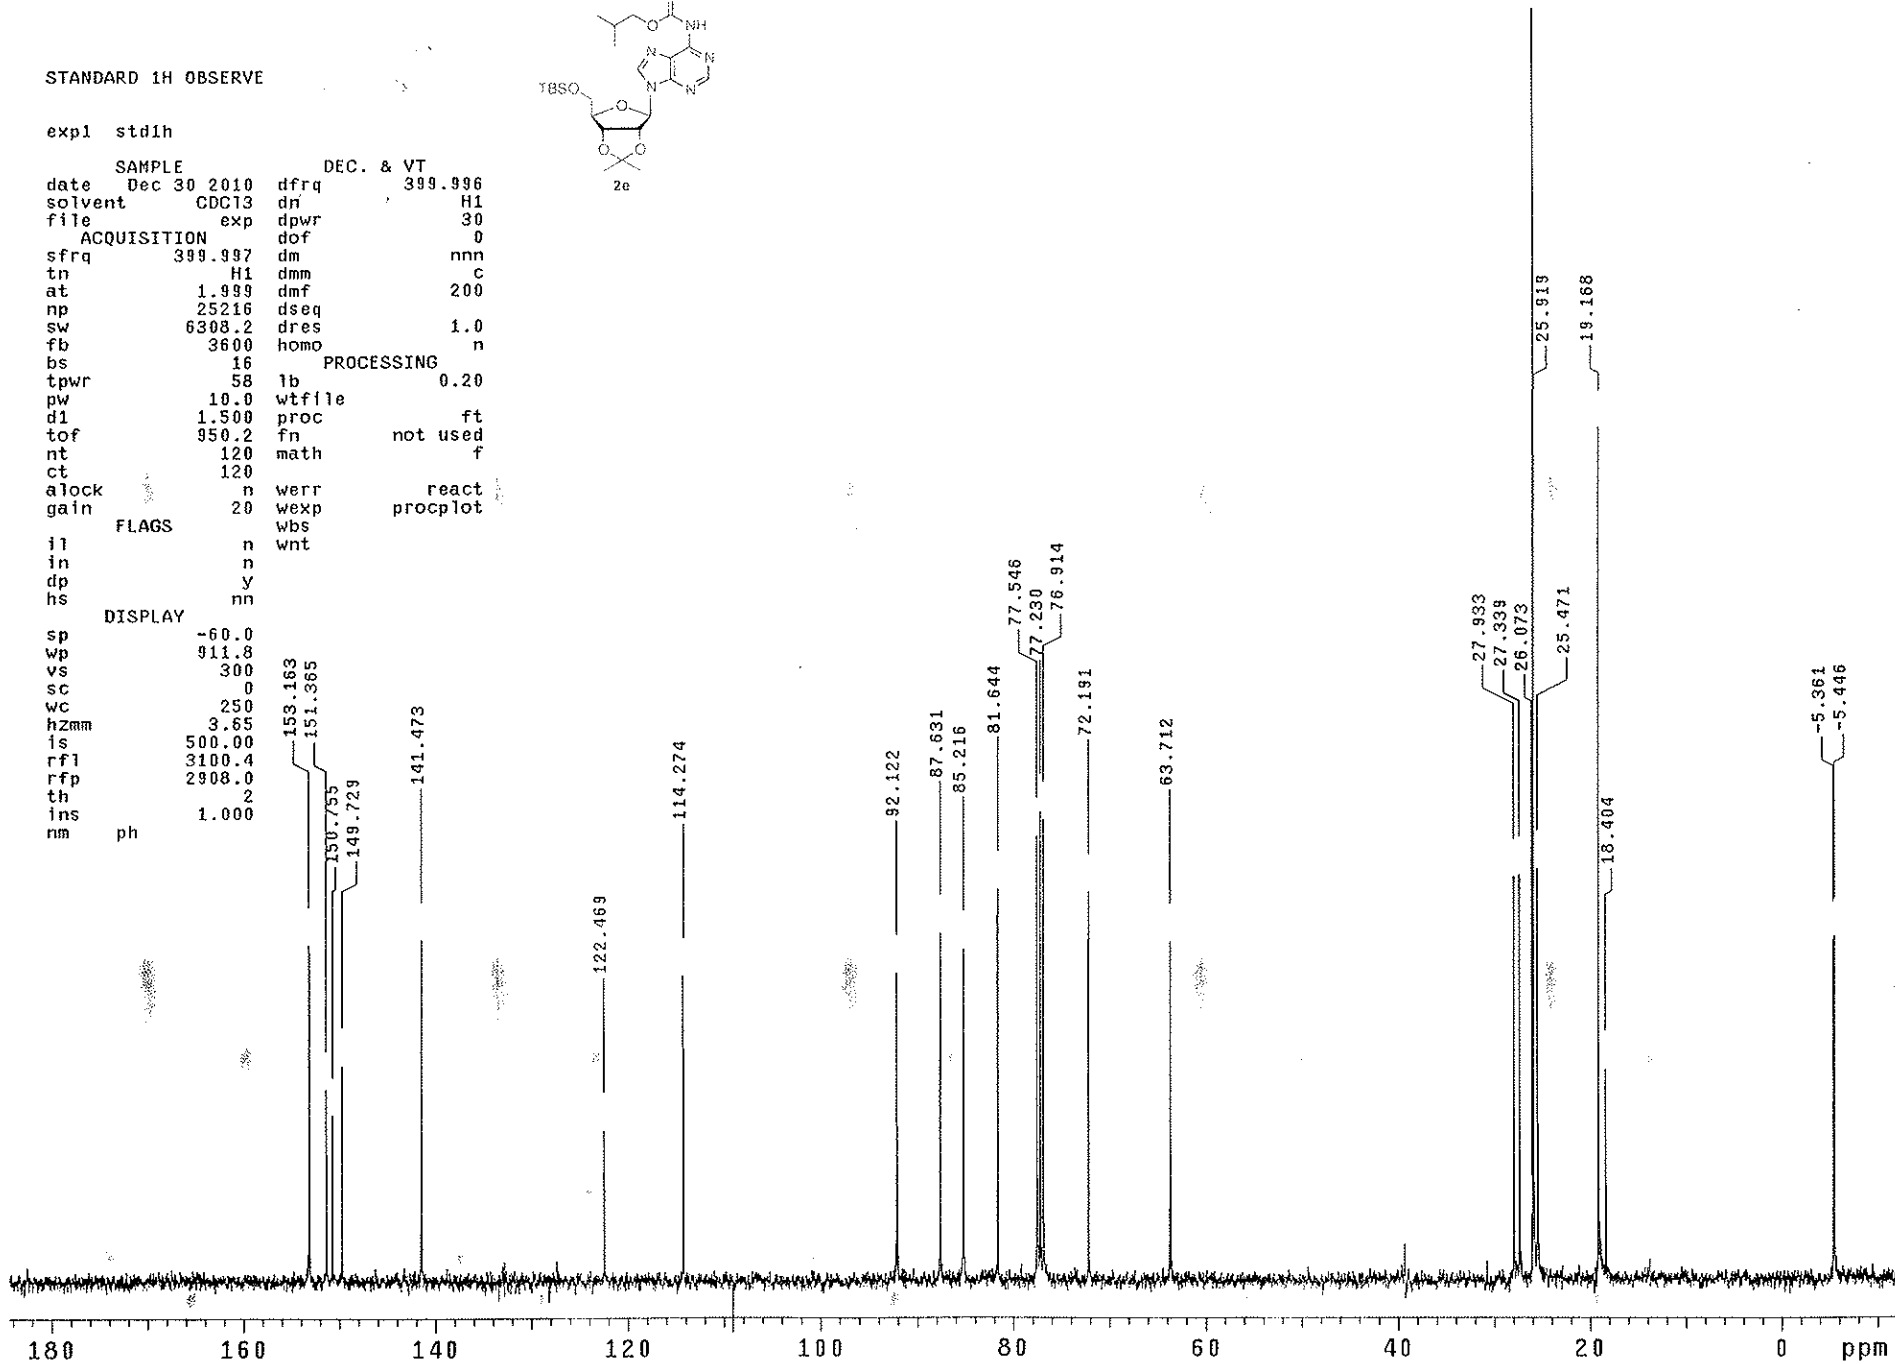

STANDARD 1H OBSERVE

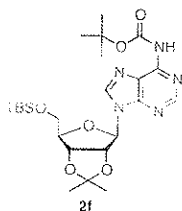

expi std1h

|             |             |            |          |
|-------------|-------------|------------|----------|
| SAMPLE      |             | DEC. & VT  |          |
| date        | Aug 20 2011 | dfrq       | 399.996  |
| solvent     | CDC13       | dn         | H1       |
| file        | exp         | dpwr       | 30       |
| ACQUISITION |             | dof        | 0        |
| sfrq        | 399.997     | dm         | nnn      |
| tn          | H1          | dmm        | c        |
| at          | 1.999       | dmf        | 200      |
| np          | 25216       | dseq       |          |
| sw          | 6308.2      | dres       | 1.0      |
| fb          | 3600        | homo       | n        |
| bs          | 16          | PROCESSING |          |
| tpwr        | 58          | lb         | 0.20     |
| pw          | 10.0        | wtfile     |          |
| d1          | 1.500       | proc       | ft       |
| tof         | 950.2       | fn         | not used |
| nt          | 120         | math       | f        |
| ct          | 96          |            |          |
| alock       | n           | werr       | react    |
| gain        | 20          | wexp       | procplot |
| FLAGS       |             | wbs        |          |
|             |             | wnt        |          |
| il          | n           |            |          |
| in          | n           |            |          |
| dp          | y           |            |          |
| hs          | nn          |            |          |
| DISPLAY     |             |            |          |
| sp          | -143.1      |            |          |
| wp          | 4708.3      |            |          |
| vs          | 207         |            |          |
| sc          | 0           |            |          |
| wc          | 250         |            |          |
| hzmm        | 18.83       |            |          |
| is          | 500.00      |            |          |
| rfl         | 3100.7      |            |          |
| rfp         | 2908.0      |            |          |
| th          | 2           |            |          |
| ins         | 1.000       |            |          |
| nm          | ph          |            |          |

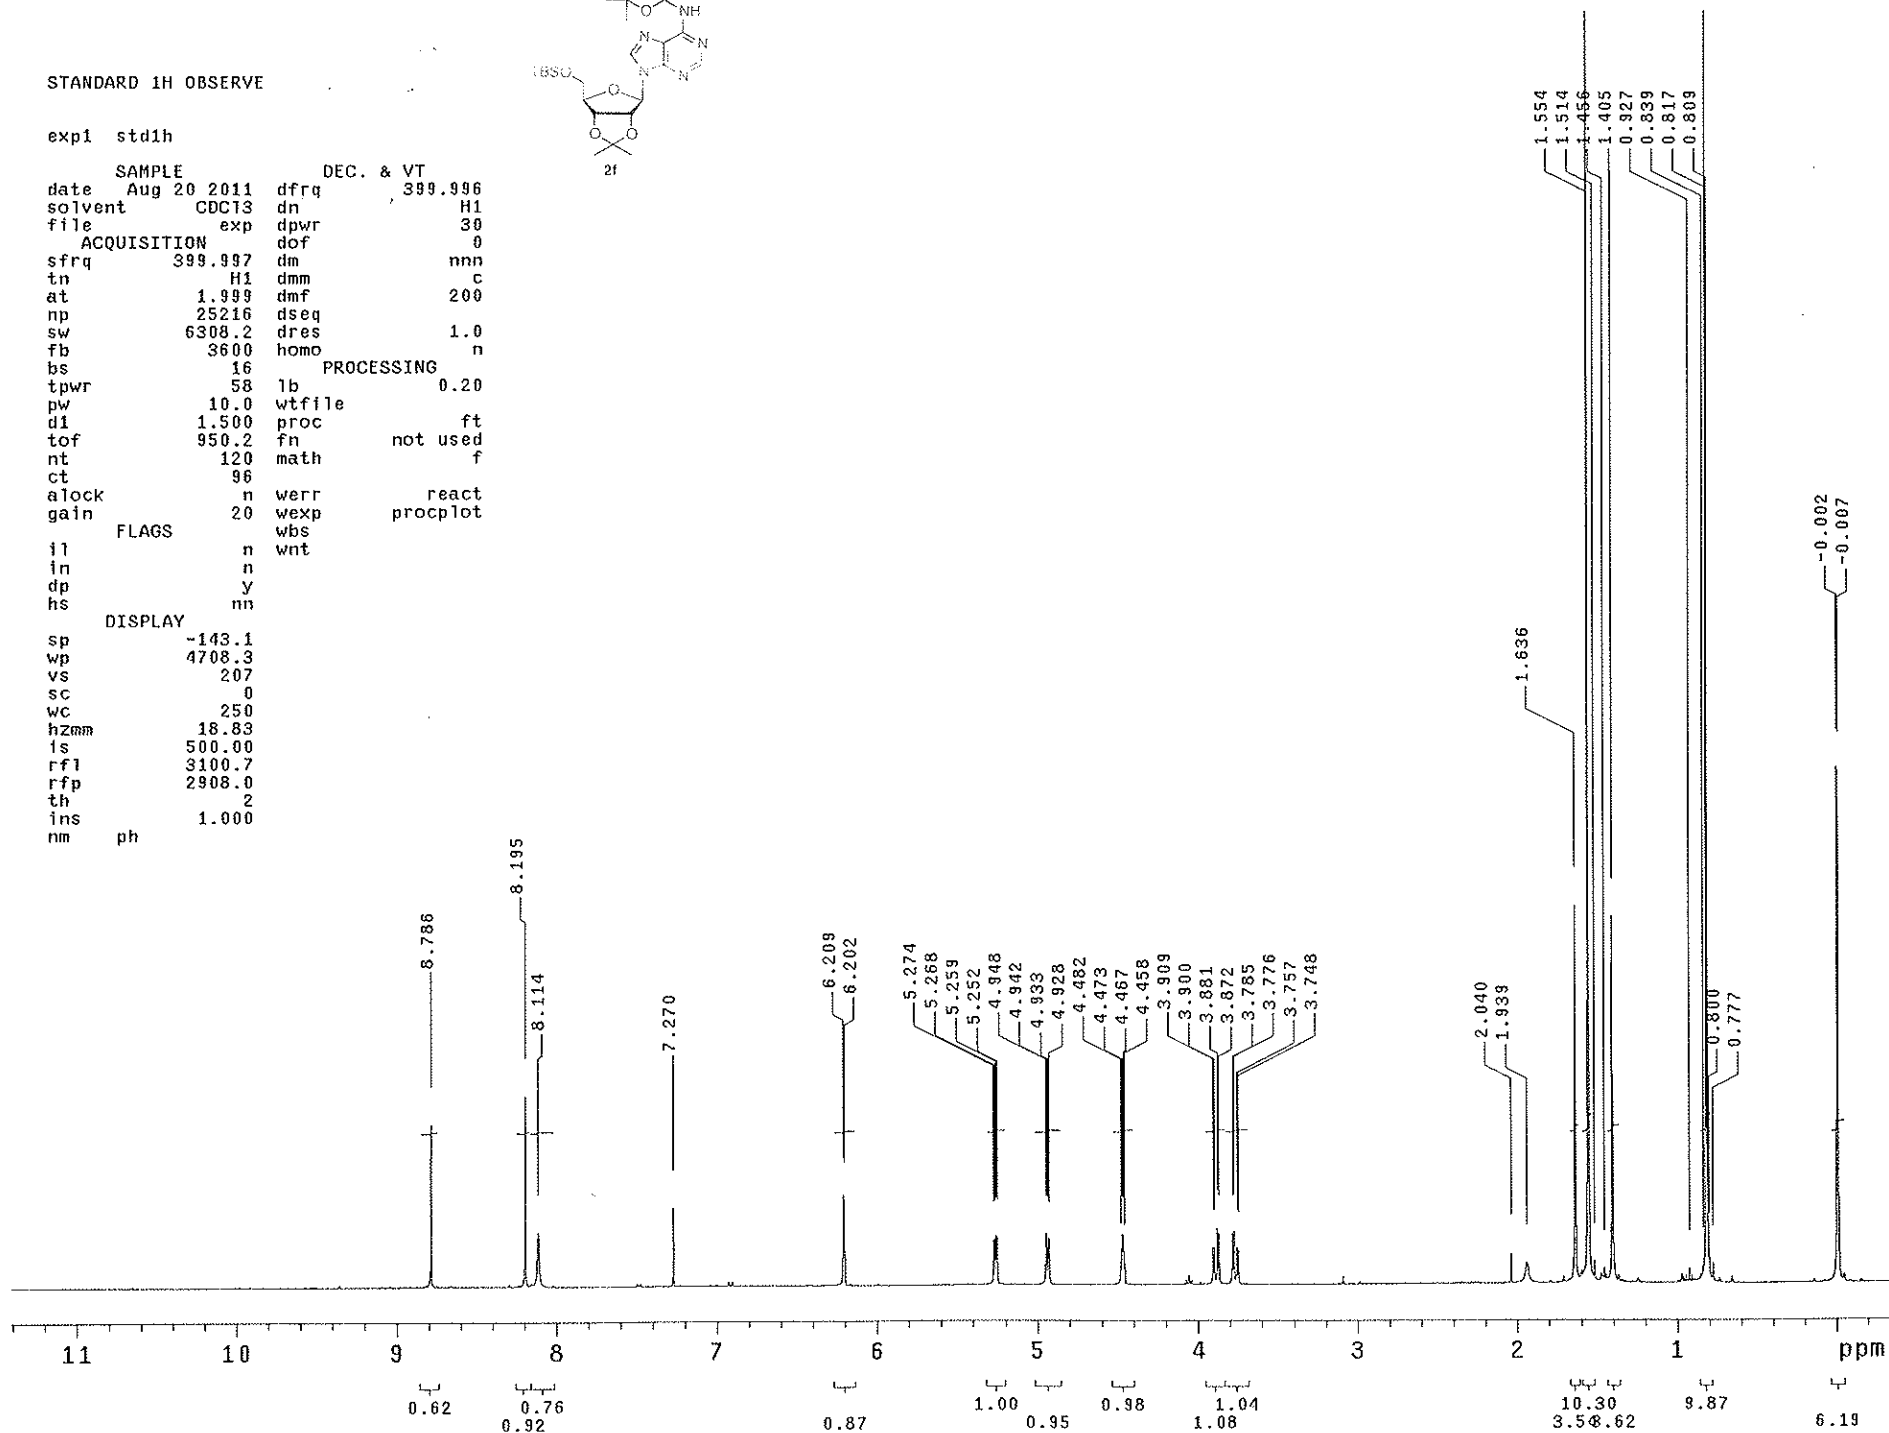

C13 STD

exp1 std1h

SAMPLE DEC. & VT  
date Aug 20 2011 dfrq 399.996  
solvent CDC13 dn H1  
file exp dpwr 40  
ACQUISITION dof -363.0  
sfrq 100.590 dm yyy  
tn C13 dmm w  
at 1.599 dmf 9000  
np 81344 dseq  
sw 25429.1 dres 1.0  
fb 14000 homo n  
bs 16 PROCESSING  
tpwr 58 lb 2.00  
pw 6.0 wtfile  
d1 4.000 proc ft  
tof 1659.9 fn 65536  
nt 1200 math f  
ct 1104  
alock n werr react  
gain 20 wexp procplot  
FLAGS wbs testsn  
wnt  
il n  
in n  
dp y  
hs nn  
DISPLAY  
sp -1238.5  
wp 20249.7  
vs 124763  
sc 0  
wc 250  
hzmm 81.00  
is 500.00  
rf1 9306.5  
rfp 7767.7  
th 4  
ins 100.000  
ai ph

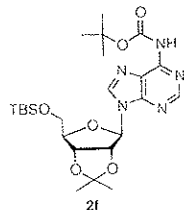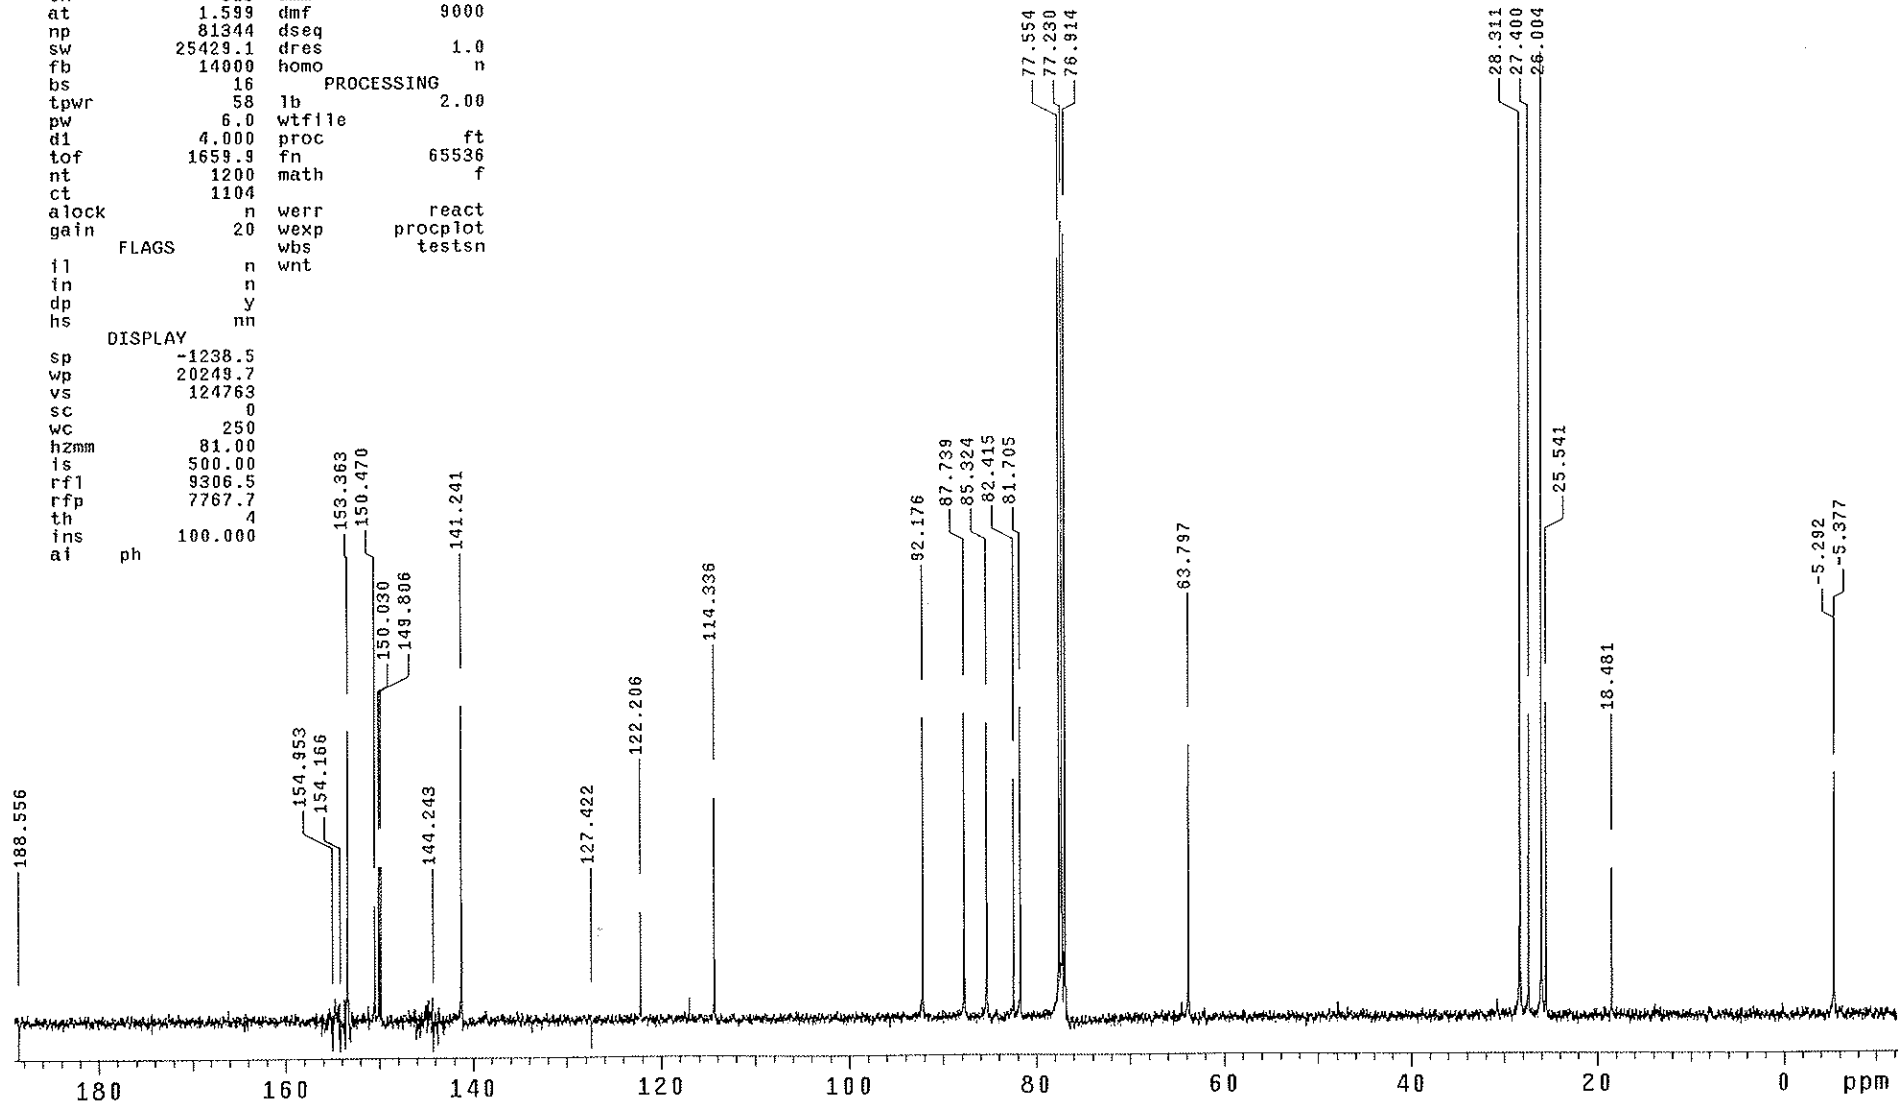

## STANDARD 1H OBSERVE

exp1 std1h

SAMPLE DEC. & VT  
 date Aug 19 2011 dfrq 399.996  
 solvent CDC13 dn H1  
 file exp dpwr 30  
 ACQUISITION dof 0  
 sfrq 399.997 dm nnn  
 tn H1 dmm c  
 at 1.999 dmf 200  
 np 25216 dseq  
 sw 6308.2 dres 1.0  
 fb 3600 homo n  
 bs 16  
 tpwr 58 lb 0.20  
 pw 10.0 wtfile  
 d1 1.500 proc ft  
 tof 950.2 fn not used  
 nt 120 math f  
 ct 64  
 alock n werr react  
 gain 20 wexp procplot  
 FLAGS  
 il n wnt  
 in n  
 dp y  
 hs nn  
 DISPLAY  
 sp -146.7  
 vp 4285.5  
 vs 402  
 sc 0  
 wc 250  
 hzmm 17.14  
 is 500.00  
 rf1 187.9  
 rfp 0  
 th 2  
 ins 1.000  
 nm ph

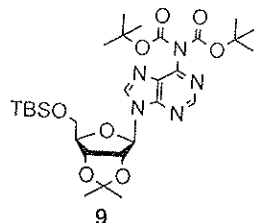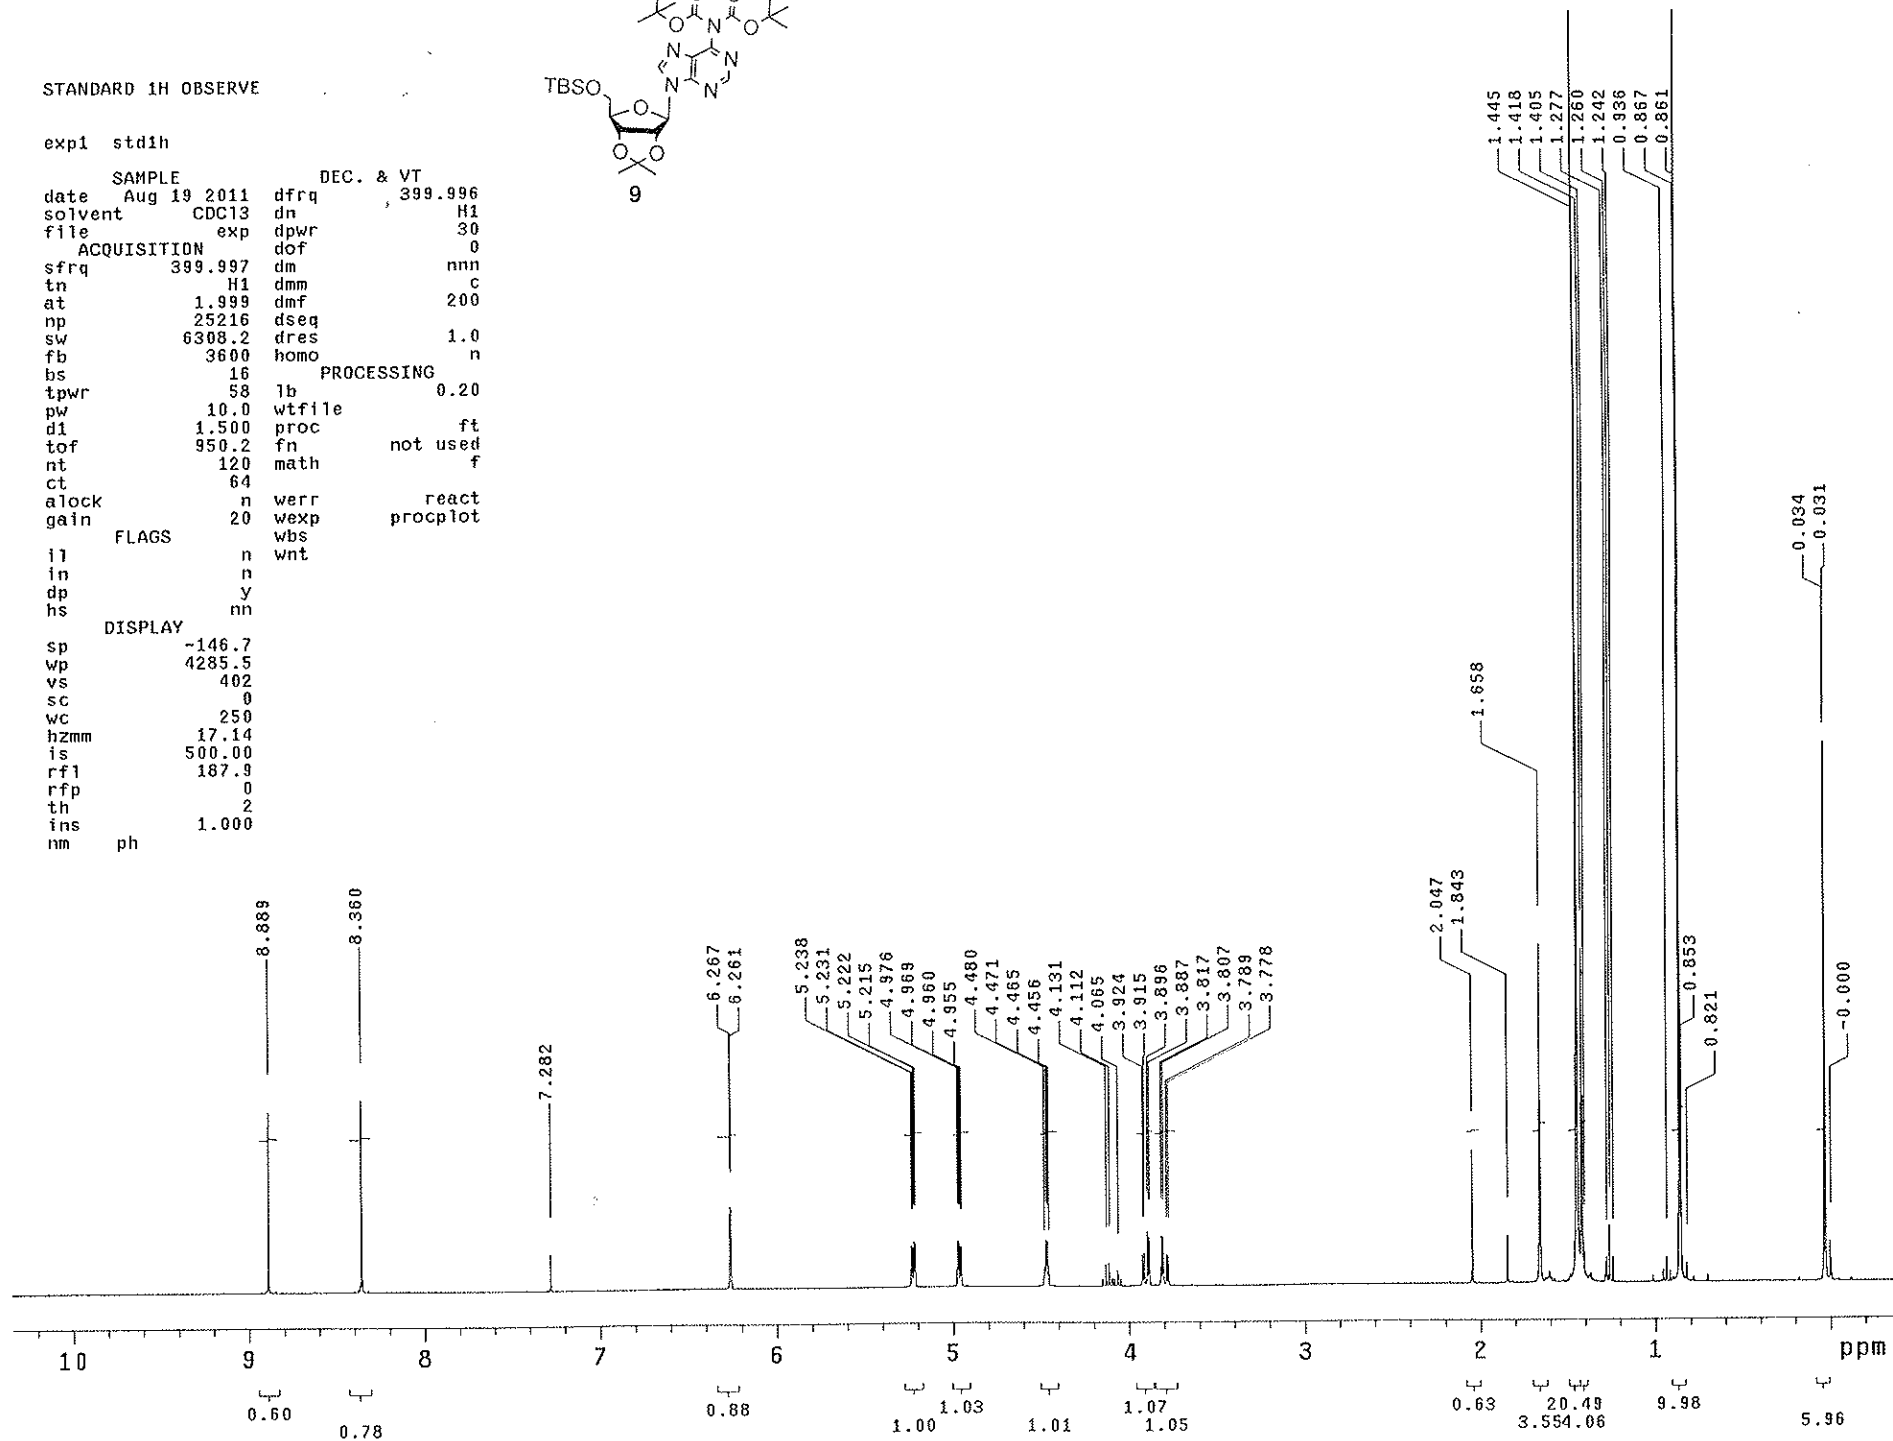

C13 STD

expi stdih

|             |             |            |          |
|-------------|-------------|------------|----------|
| SAMPLE      |             | DEC. & VT  |          |
| date        | Aug 19 2011 | dfrq       | 399.996  |
| solvent     | CDC13       | dn         | H1       |
| file        | exp         | dpwr       | 40       |
| ACQUISITION |             | dof        | -363.0   |
| sfrq        | 100.590     | dm         | yyv      |
| tn          | C13         | dmm        | w        |
| at          | 1.599       | dmf        | 9000     |
| np          | 81344       | dseq       |          |
| sw          | 25429.1     | dres       | 1.0      |
| fb          | 14000       | homo       | n        |
| bs          | 16          | PROCESSING |          |
| tpwr        | 58          | fb         | 2.00     |
| pw          | 6.0         | wtfile     |          |
| d1          | 4.000       | proc       | ft       |
| tof         | 1659.9      | fn         | 65536    |
| nt          | 1200        | math       | f        |
| ct          | 432         |            |          |
| alock       | n           | werr       | react    |
| gain        | 20          | wexp       | procplot |
| FLAGS       |             | wbs        | testsn   |
|             |             | wnt        |          |
| il          | n           |            |          |
| in          | n           |            |          |
| dp          | y           |            |          |
| hs          | nn          |            |          |
| DISPLAY     |             |            |          |
| sp          | -1139.1     |            |          |
| wp          | 19514.0     |            |          |
| vs          | 55792       |            |          |
| sc          | 0           |            |          |
| wc          | 250         |            |          |
| hzmm        | 78.06       |            |          |
| is          | 500.00      |            |          |
| rfl         | 9307.3      |            |          |
| rfp         | 7767.7      |            |          |
| th          | 3           |            |          |
| ins         | 100.000     |            |          |
| al          | ph          |            |          |

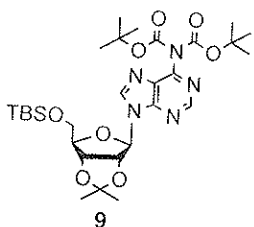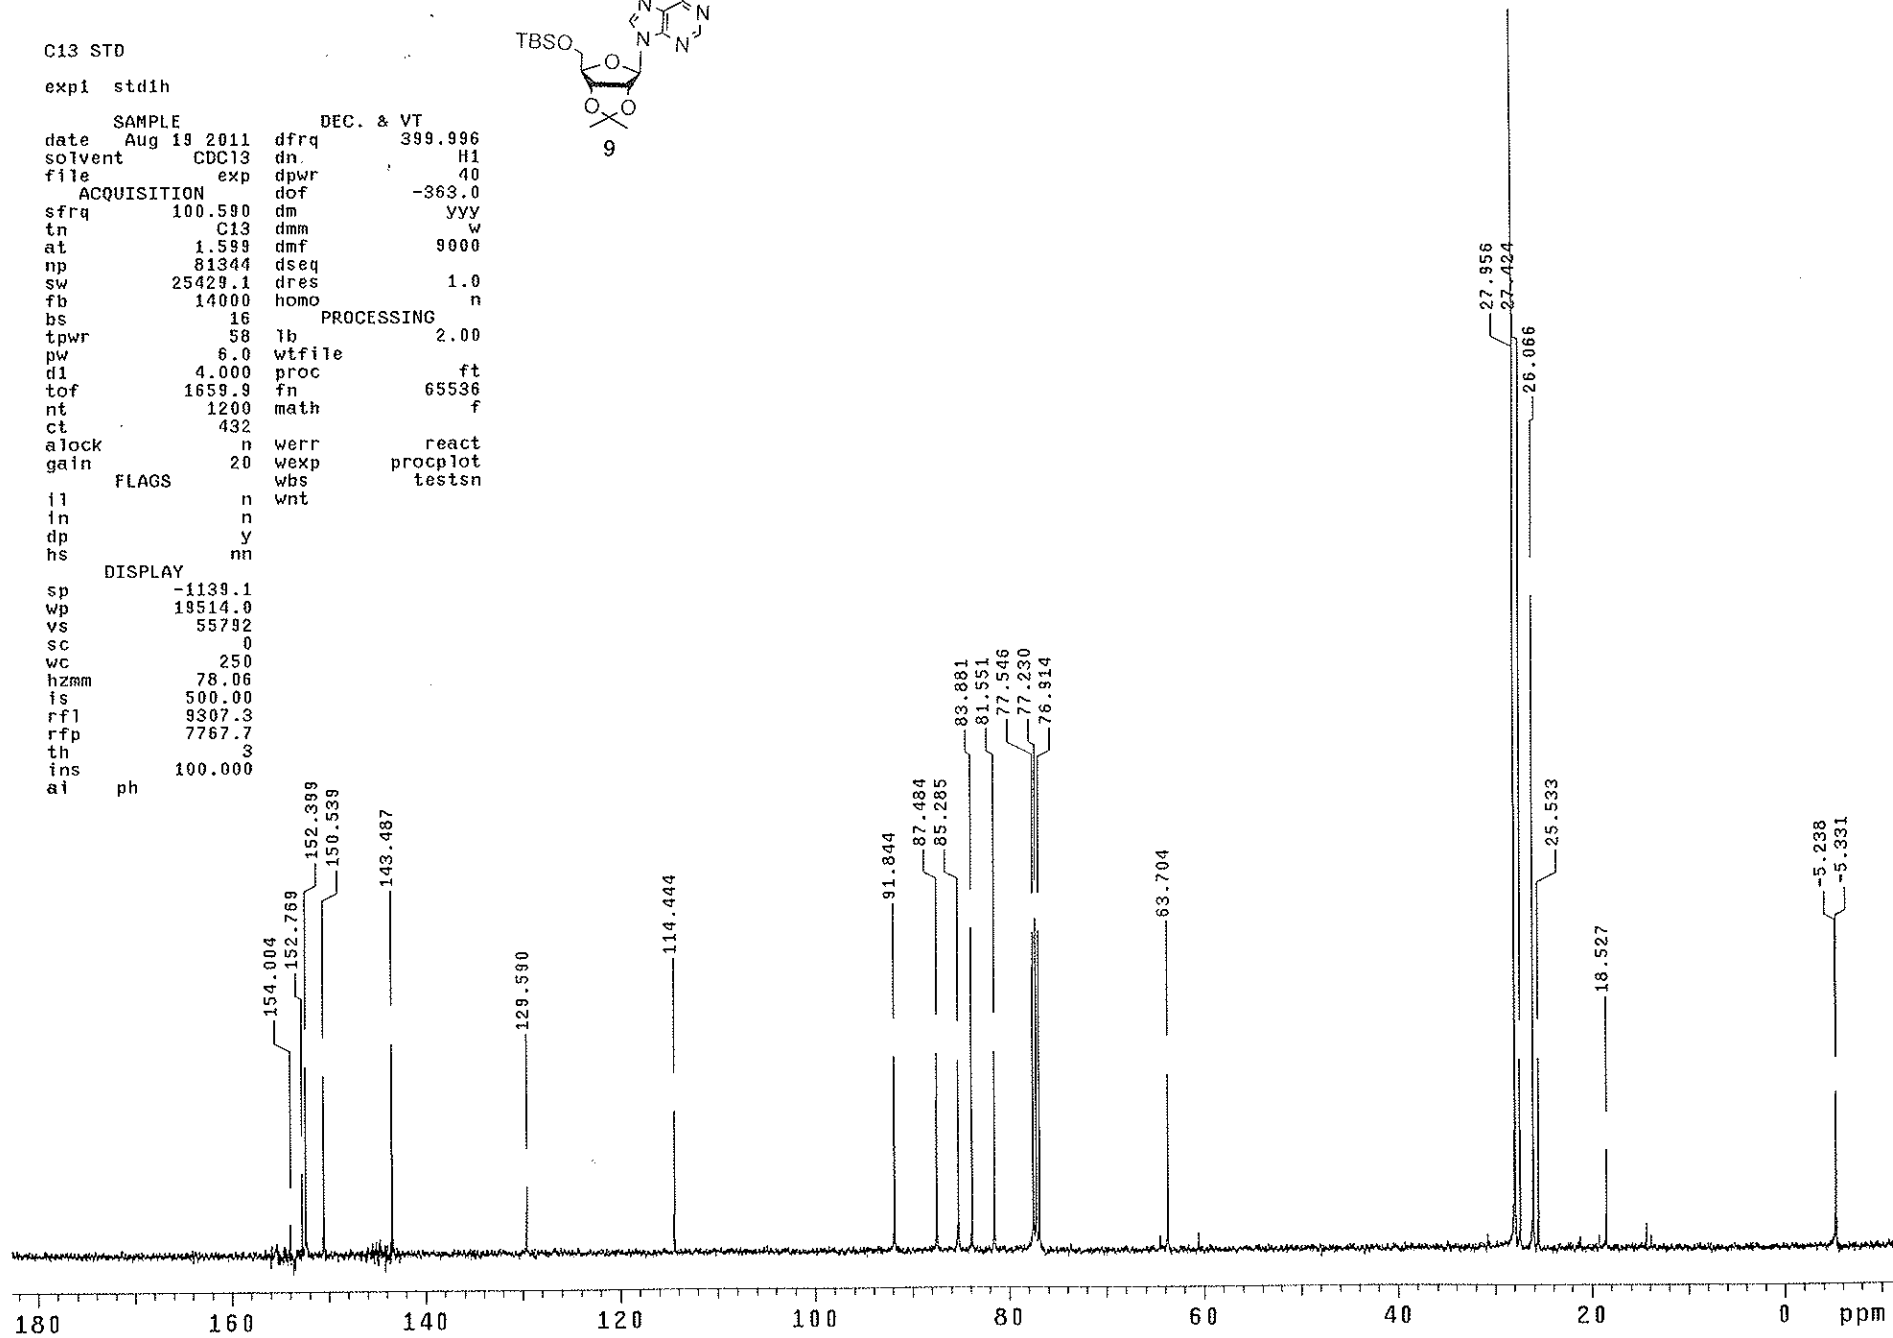



STANDARD 1H OBSERVE

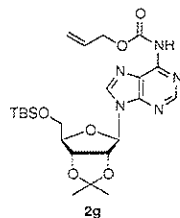

```

exp1 std1h
SAMPLE
date Apr 19 2012 dfrq 399.996
solvent CDC13 dn H1
file exp dpwr 30
ACQUISITION dof 0
sfrq 399.397 dm nnn
tn H1 dmm c
at 1.999 dmf 200
np 25216 dseq
sw 6308.2 dres 1.0
fb 3600 homo n
bs 16
tpwr 58 lb
pw 10.0 wtfile
d1 1.500 proc ft
tof 950.2 fn not used
nt 120 math f
ct 120
alock n werr react
gain 20 wexp procp1ot
FLAGS
il n
in n
dp y
hs nn
DISPLAY
sp -135.0
wp 5006.7
vs 241
sc 0
wc 250
hzmm 20.03
is 500.00
rf1 3100.7
rfp 2908.0
th 2
ins 1.000
nm ph
    
```

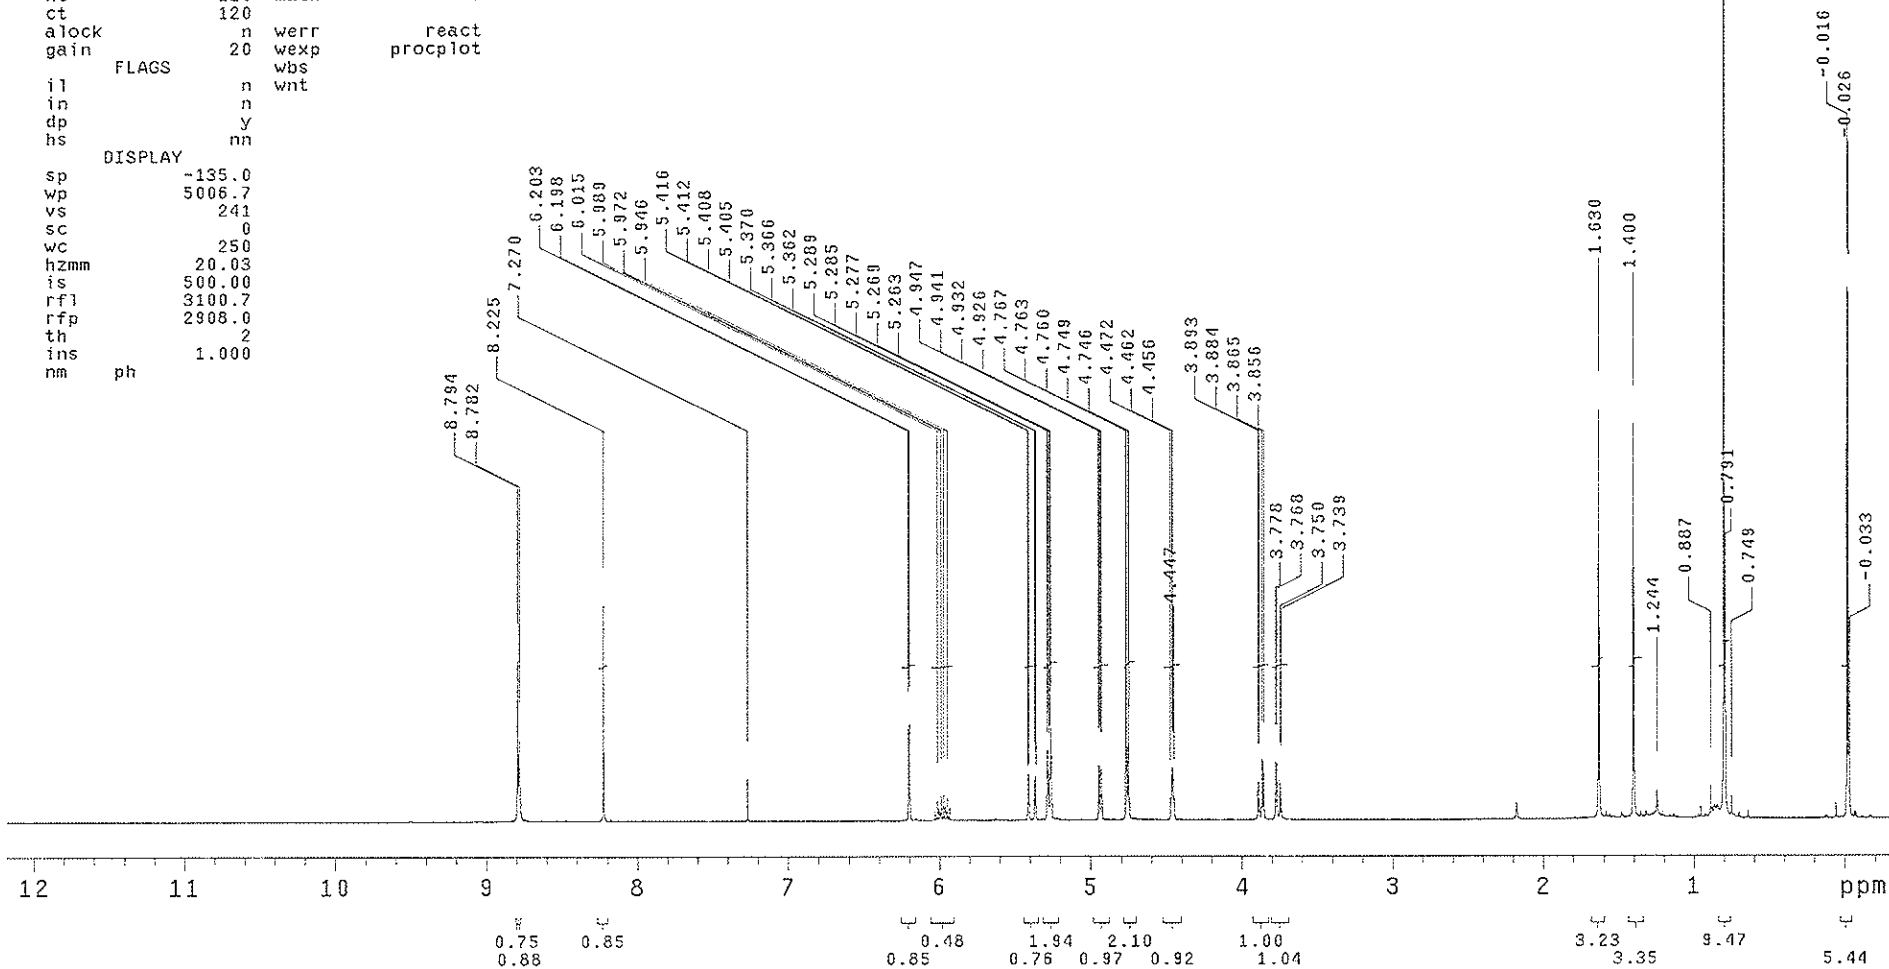

C13 STD

exp1 stdih

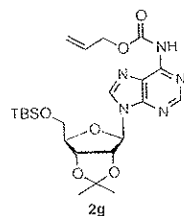

SAMPLE DEC. & VT  
date Dec 30 2010 dfrq 399.996  
solvent CDC13 dn H1  
file exp dpwr 40  
ACQUISITION dof -363.0  
sfrq 100.590 dm yyy  
tn C13 dmm w  
at 1.599 dmf 9000  
np 81344 dseq  
sw 25429.1 dres 1.0  
fb 14000 homo n  
bs 16  
tpwr 58 lb PROCESSING 2.00  
pw 6.0 wtfile  
d1 4.000 proc ft  
tof 1659.9 fn 65536  
nt 800 math f  
ct 224  
alock n werr react  
gain 20 wexp procplot  
wbs testsn  
wnt

FLAGS  
il n  
in n  
dp y  
hs nn

DISPLAY  
sp -1274.9  
wp 19881.8  
vs 96268  
sc 0  
wc 250  
hzmm 79.53  
is 500.00  
rfl 9309.6  
rfp 7767.7  
th 4  
ins 100.000  
al ph

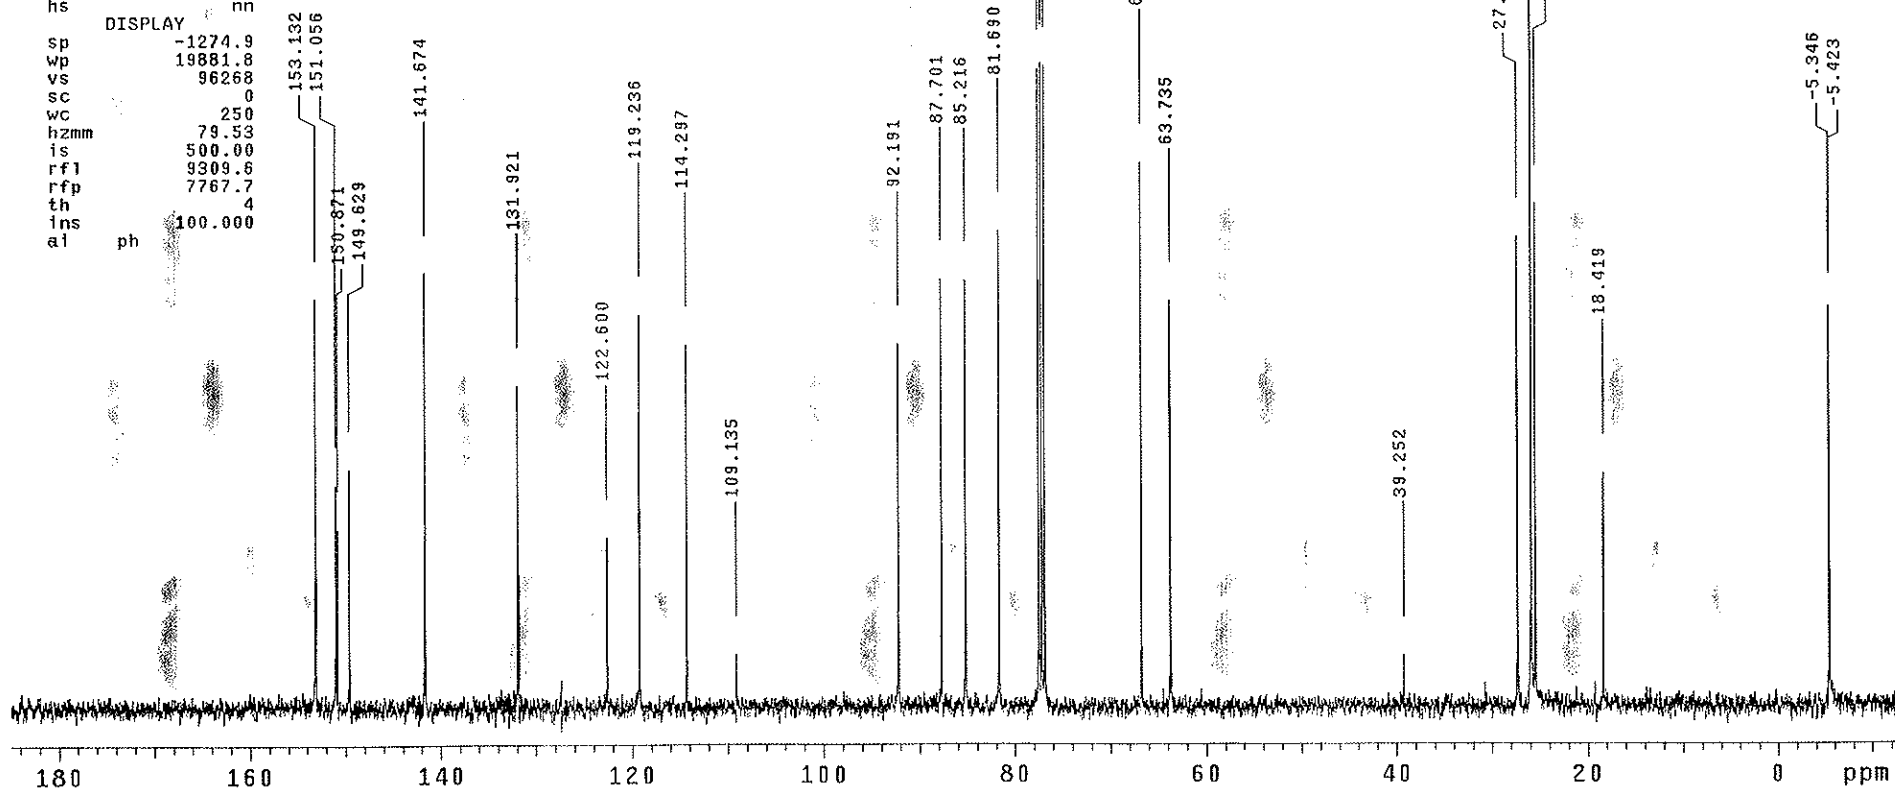

STANDARD 1H OBSERVE

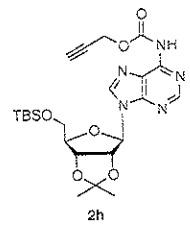

```

exp1 std1h
SAMPLE
date Apr 19 2012 dfrq DEC. & VT 399.996
solvent CDC13 dn H1
file exp dpwr 30
ACQUISITION dof 0
sfrq 399.997 dm mnn
tn H1 dmm C
at 1.999 dmf 200
np 25216 dseq
sw 6308.2 dres 1.0
fb 3600 homo n
bs 16 PROCESSING
tpwr 58 lb 0.20
pw 10.0 wfile
d1 1.500 proc ft
tof 950.2 fn not used
nt 120 math f
ct 120
alock n werr react
gain 20 wexp procplot
FLAGS
il n wnt
in n
dp y
hs nn
DISPLAY
sp -159.7
wp 5023.3
vs 169
sc 0
wc 250
hzmm 20.09
is 500.00
rfi 3100.7
rfp 2908.0
th 2
ins 1.000
nm ph
    
```

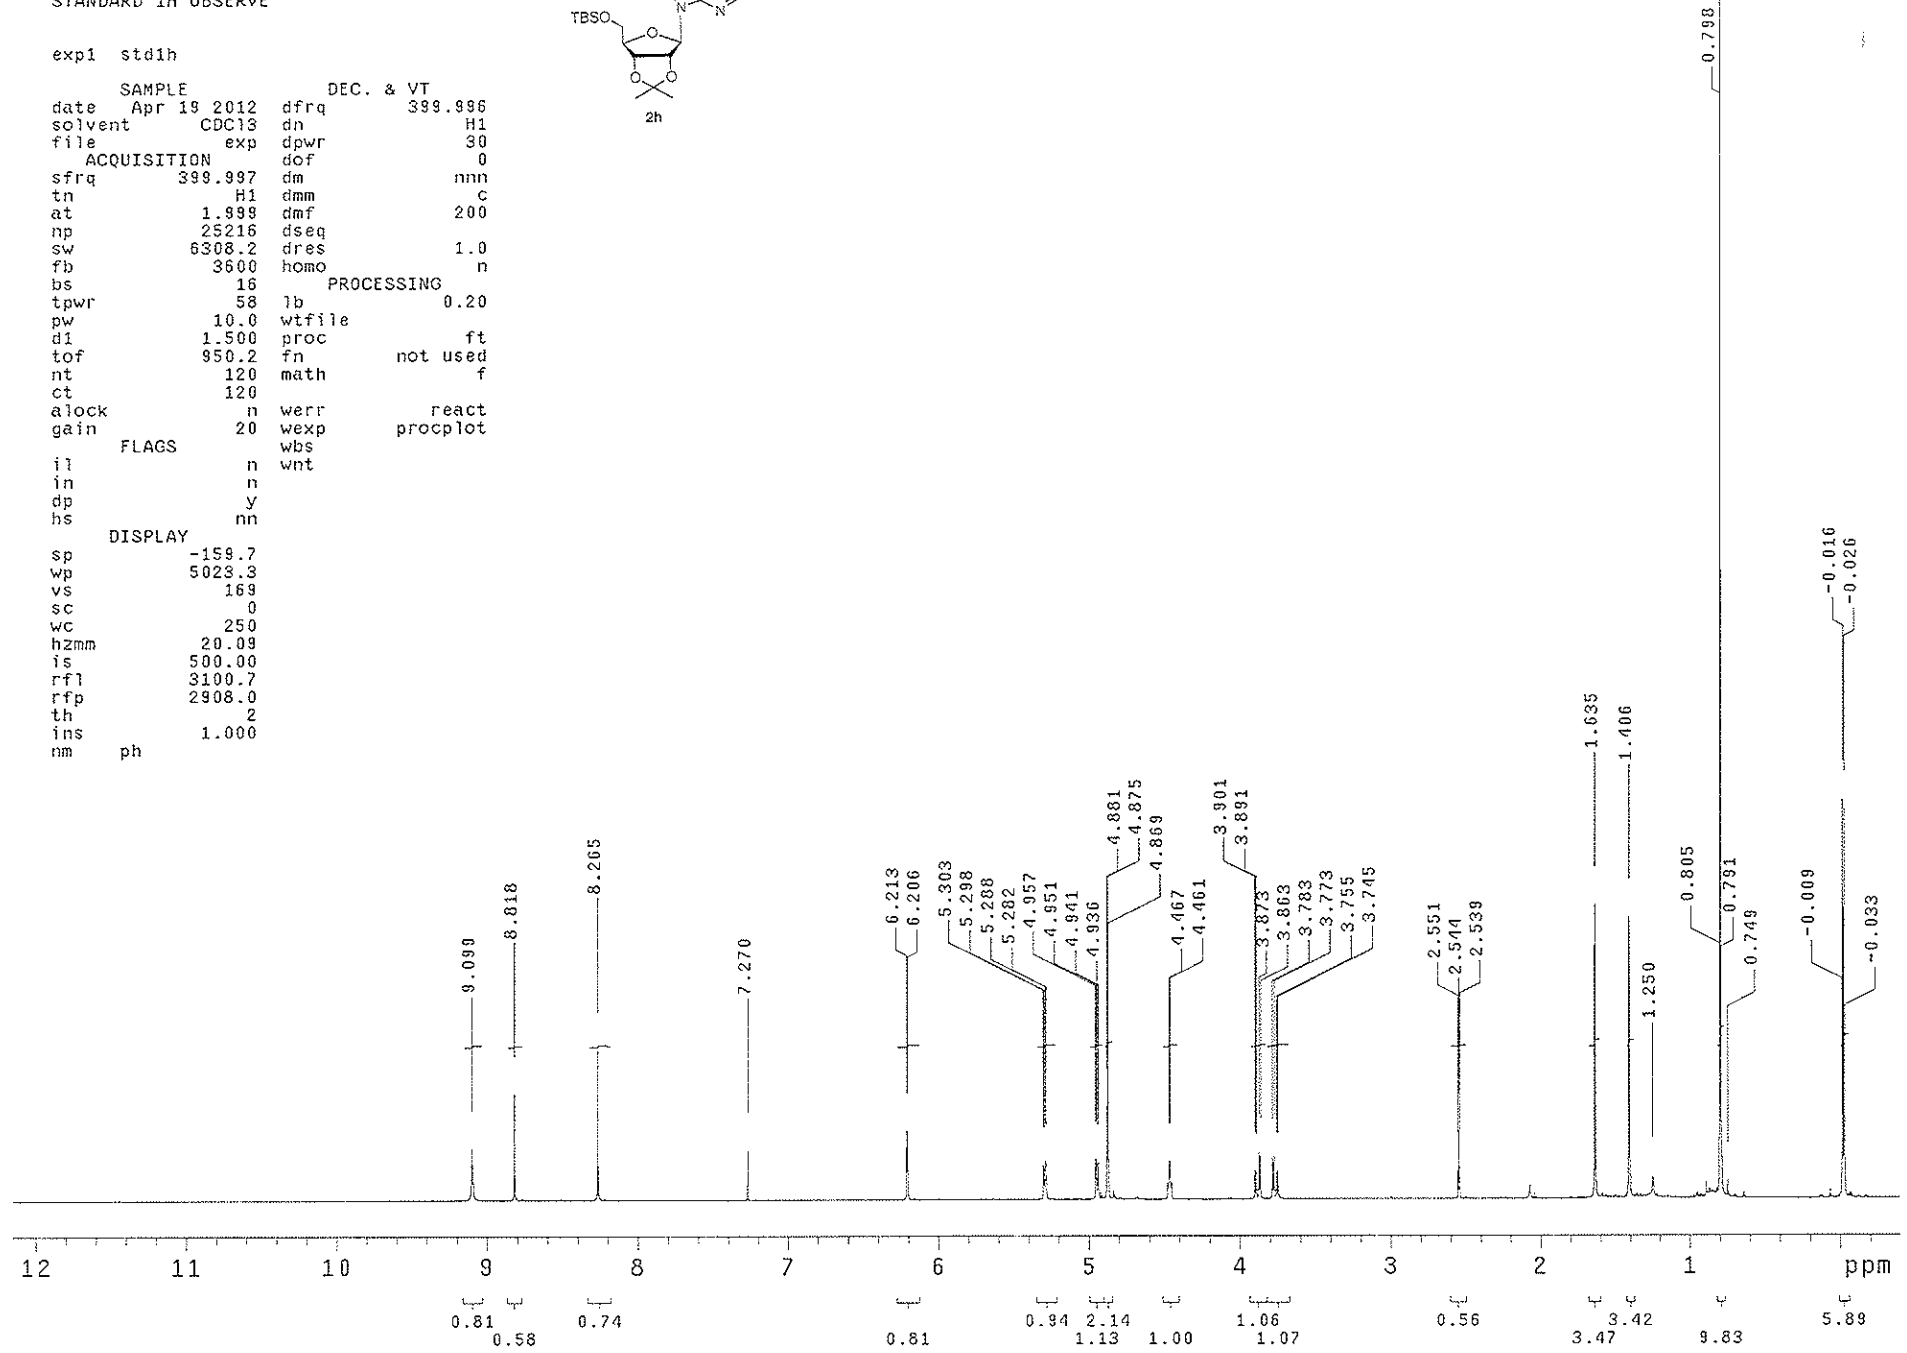

STANDARD 1H OBSERVE

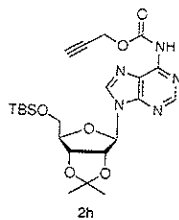

```

exp1 std1h
SAMPLE
date Apr 19 2012 dfrq DEC. & VT 399.996
solvent CDCl3 dn H1
file exp dpwr 30
ACQUISITION dof 0
sfrq 399.997 dm nnn
tn H1 dmm c
at 1.999 dmf 200
np 25216 dseq
sw 6308.2 dres 1.0
fb 3600 homo n
bs 16
tpwr 58 lb 0.20
pw 10.0 wtfile
d1 1.500 proc ft
tof 950.2 fn not used
nt 120 math f
ct 120
alock n werr react
gain 20 wexp procplot
wbs
wnt
FLAGS
il n
in n
dp y
hs nn
DISPLAY
sp -184.7
wp 994.6
vs 169
sc 0
wc 250
hzmm 3.98
is 500.00
rfl 3100.7
rfp 2908.0
th 2
ins 1.000
nm ph
    
```

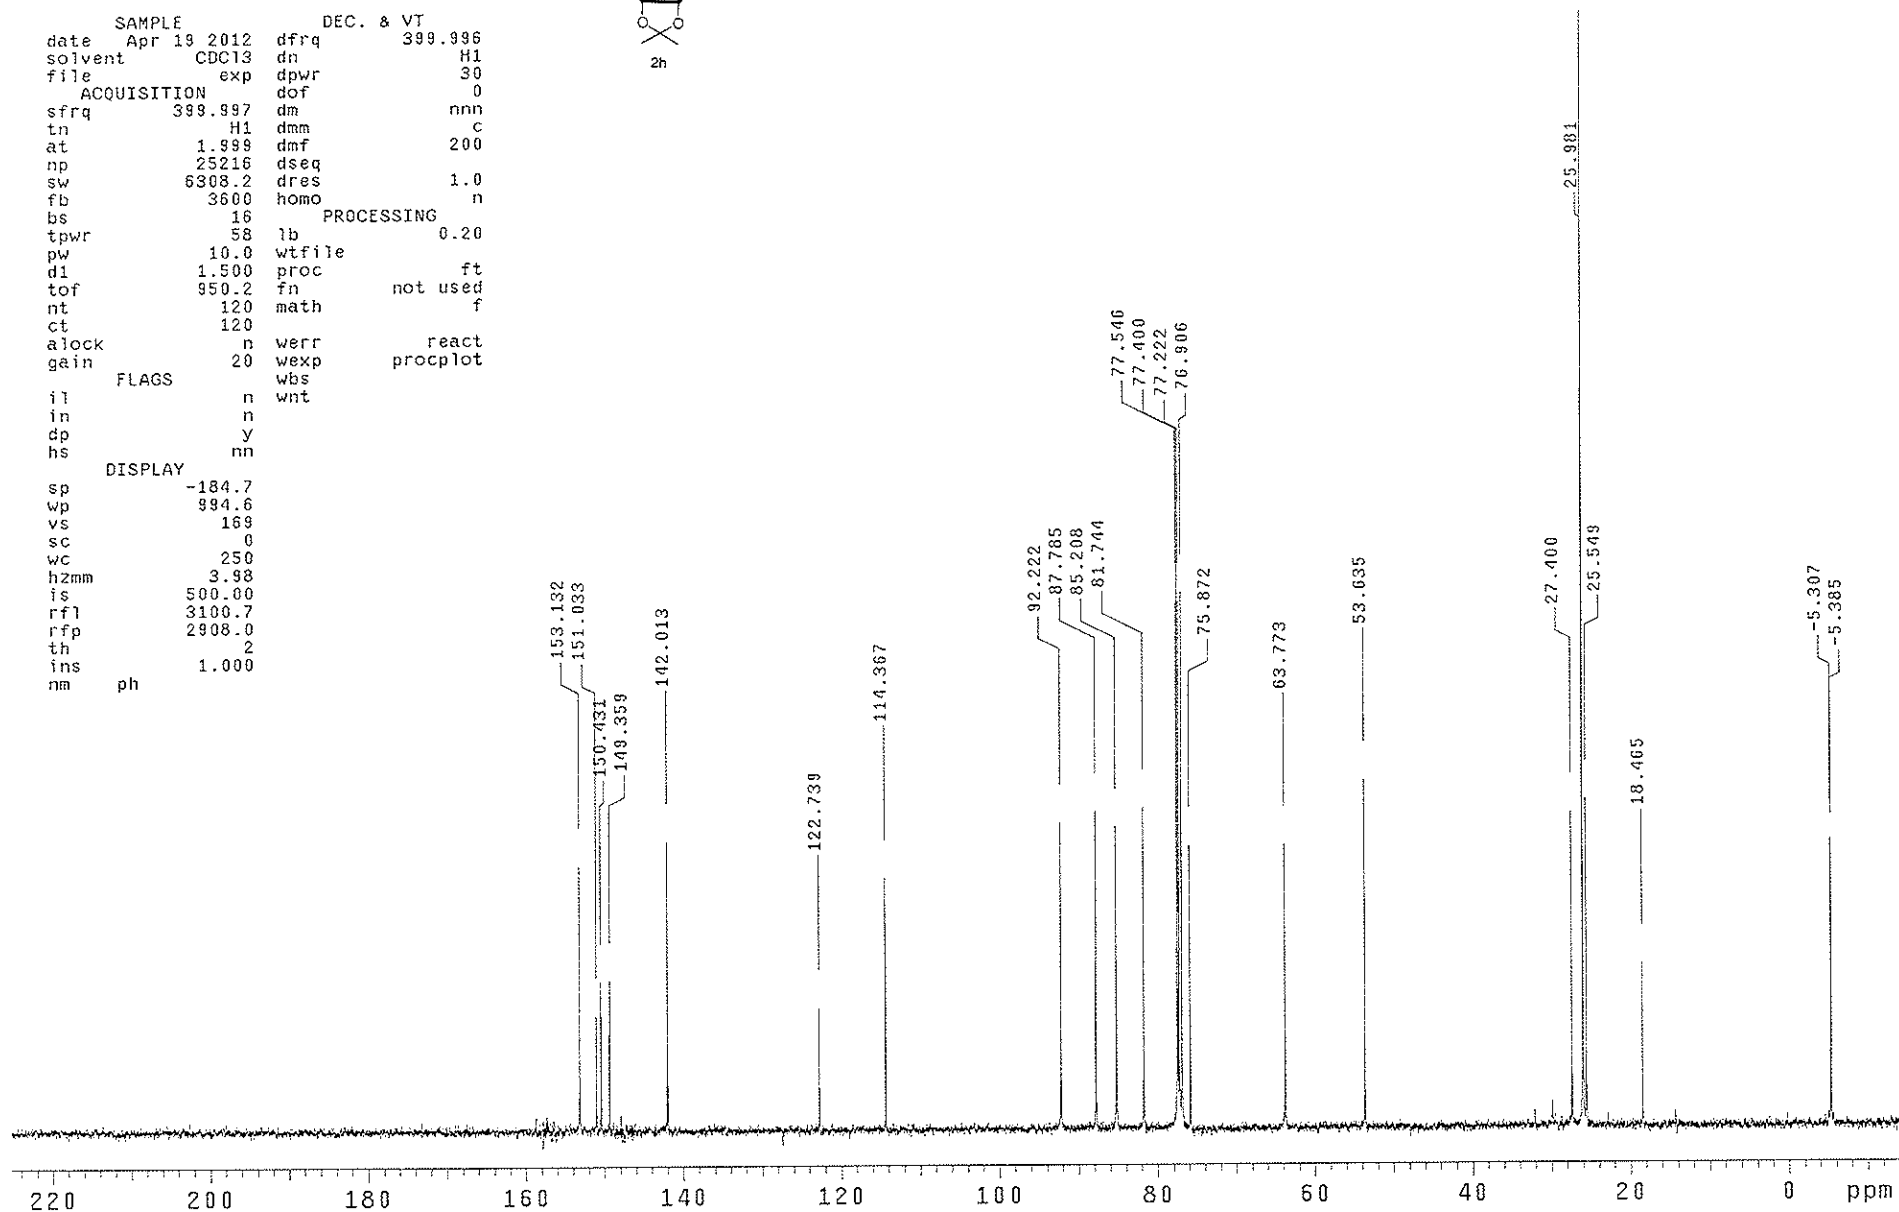

STANDARD 1H OBSERVE

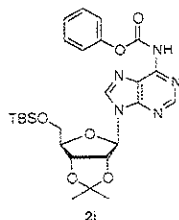

```

exp1 std1h
SAMPLE
date Apr 20 2012 dfrq DEC. & VT 399.996
solvent CDC13 dn H1
file exp dpwr 30
ACQUISITION dof 0
sfrq 399.997 dm nnn
tn H1 dmm c
at 1.999 dmf 200
np 25216 dseq
sw 6308.2 dres 1.0
fb 3600 homo n
bs 16
tpwr 58 lb 0.20
pw 10.0 wtfile
d1 1.500 proc ft
tof 950.2 fn not used
nt 120 math f
ct 120
alock n werr react
gain 20 wexp procplot
FLAGS
il n
in n
dp y
hs nn
DISPLAY
sp -142.7
wp 5047.9
vs 140
sc 0
wc 250
hzmm 20.19
is 250.00
rf1 3100.4
rfp 2908.0
th 3
ins 1.000
nm ph
    
```

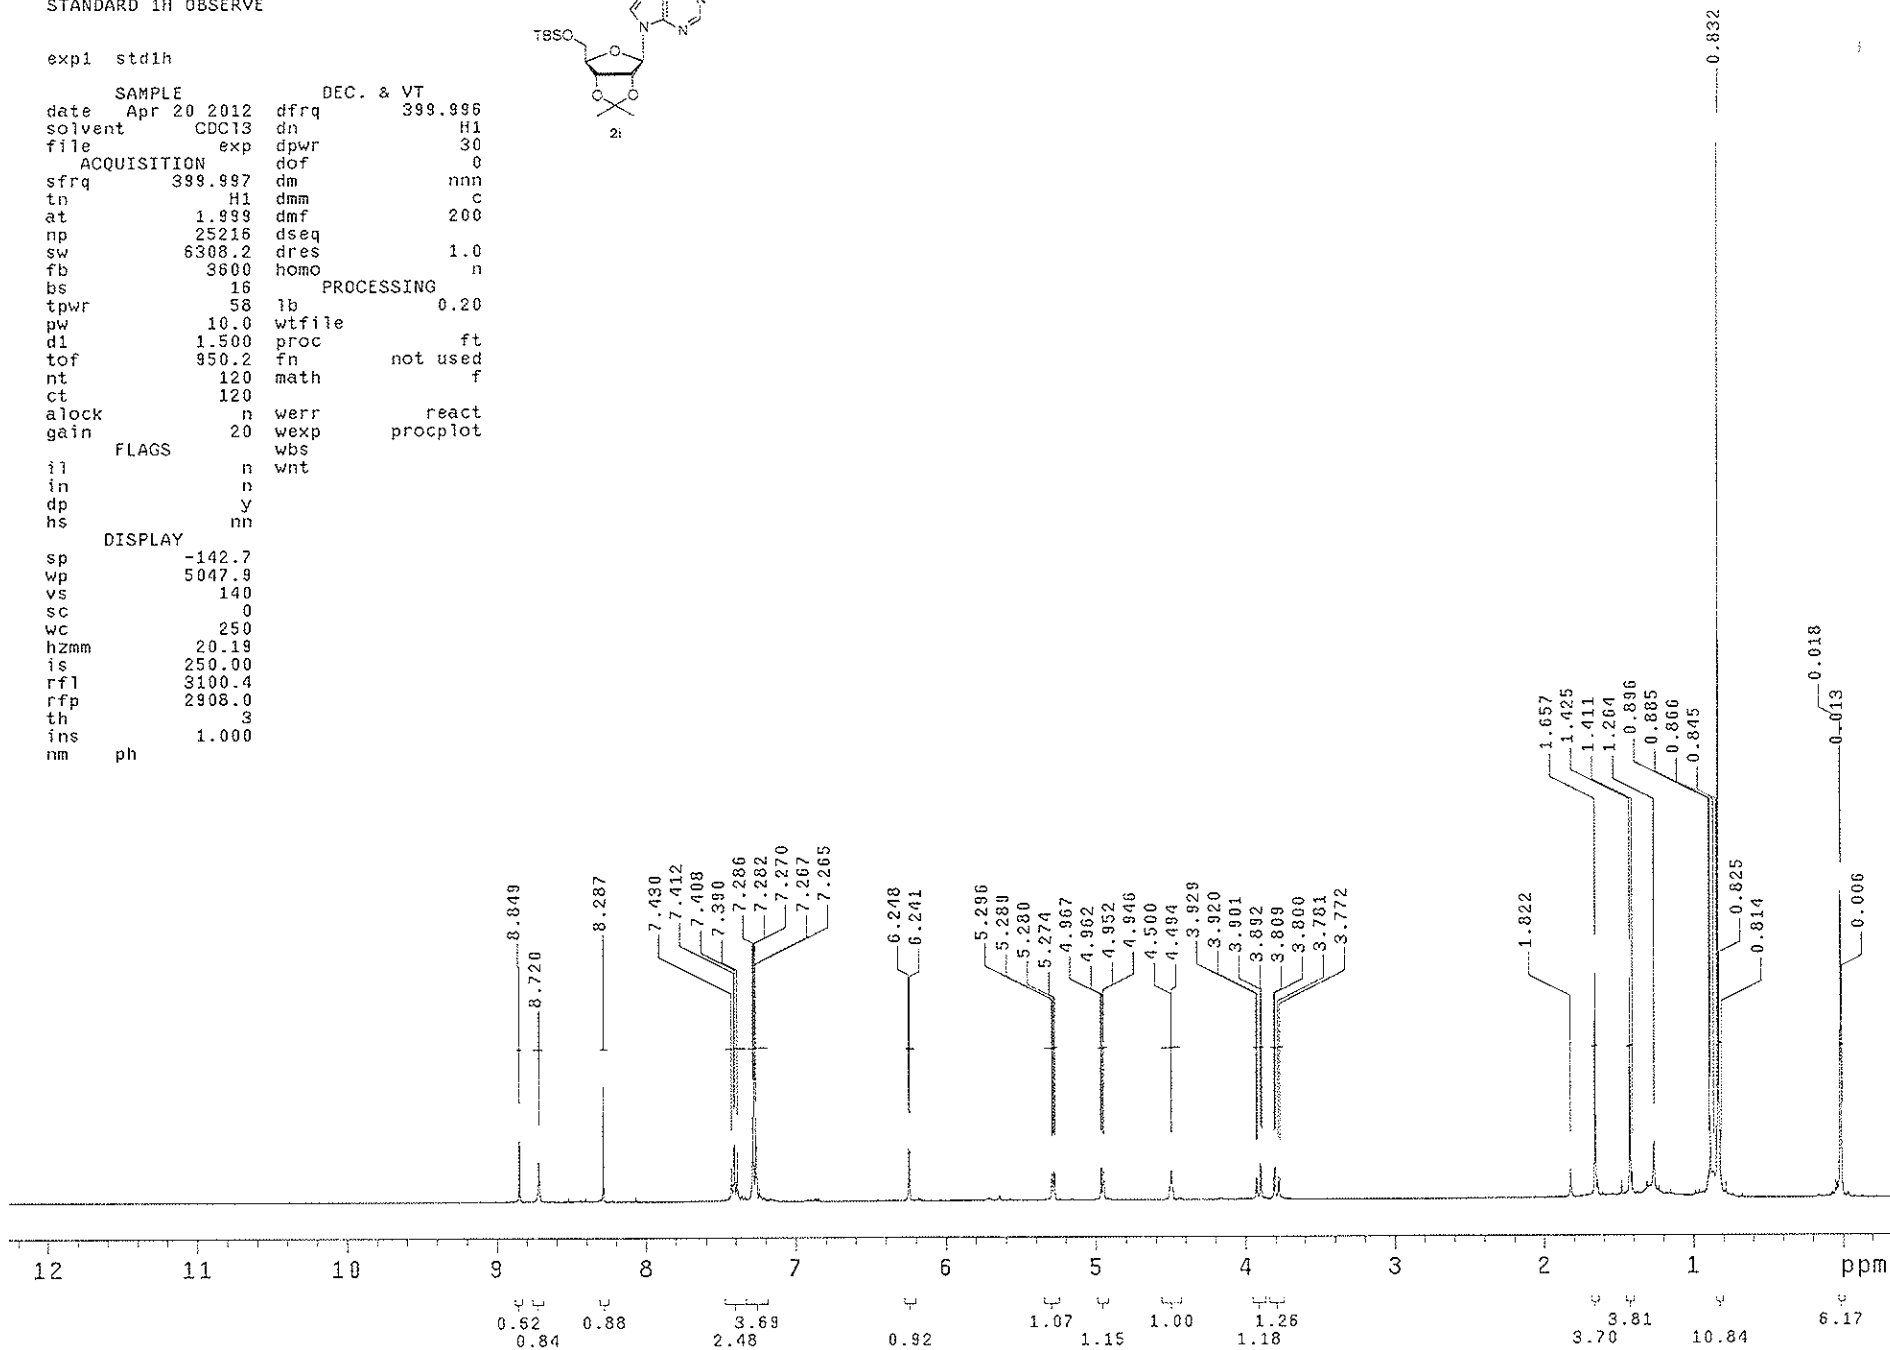

C13 STD

exp1 std1h

```
SAMPLE          DEC. & VT
date Apr 20 2012 dfrq          399.996
solvent CDC13      dn          H1
file          exp  dpwr         40
ACQUISITION     dof        -363.0
sfrq      100.590 dm          yyy
tn         C13  dmm          w
at         1.599 dmf         9000
np         81344 dseq
sw         25429.1 dres         1.0
fb         14000 homo          n
bs         16    PROCESSING
tpwr       58    lb          8.00
pw         6.0  wtfile
d1         4.000 proc          ft
tof        1659.9 fn          65536
nt         2400 math          f
ct         816
alock      n     werr         react
gain       20   wexp        procp
          n     wbs         testsn
          n     wnt
          n
          y
          nn
DISPLAY
sp        -1202.8
wp        21652.8
vs        354792
sc         0
wc         250
hzmh      86.61
is         500.00
rfl       9304.2
rfp       7767.7
th         4
ins       100.000
ai        ph
```

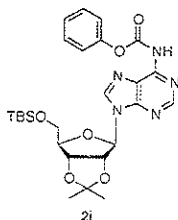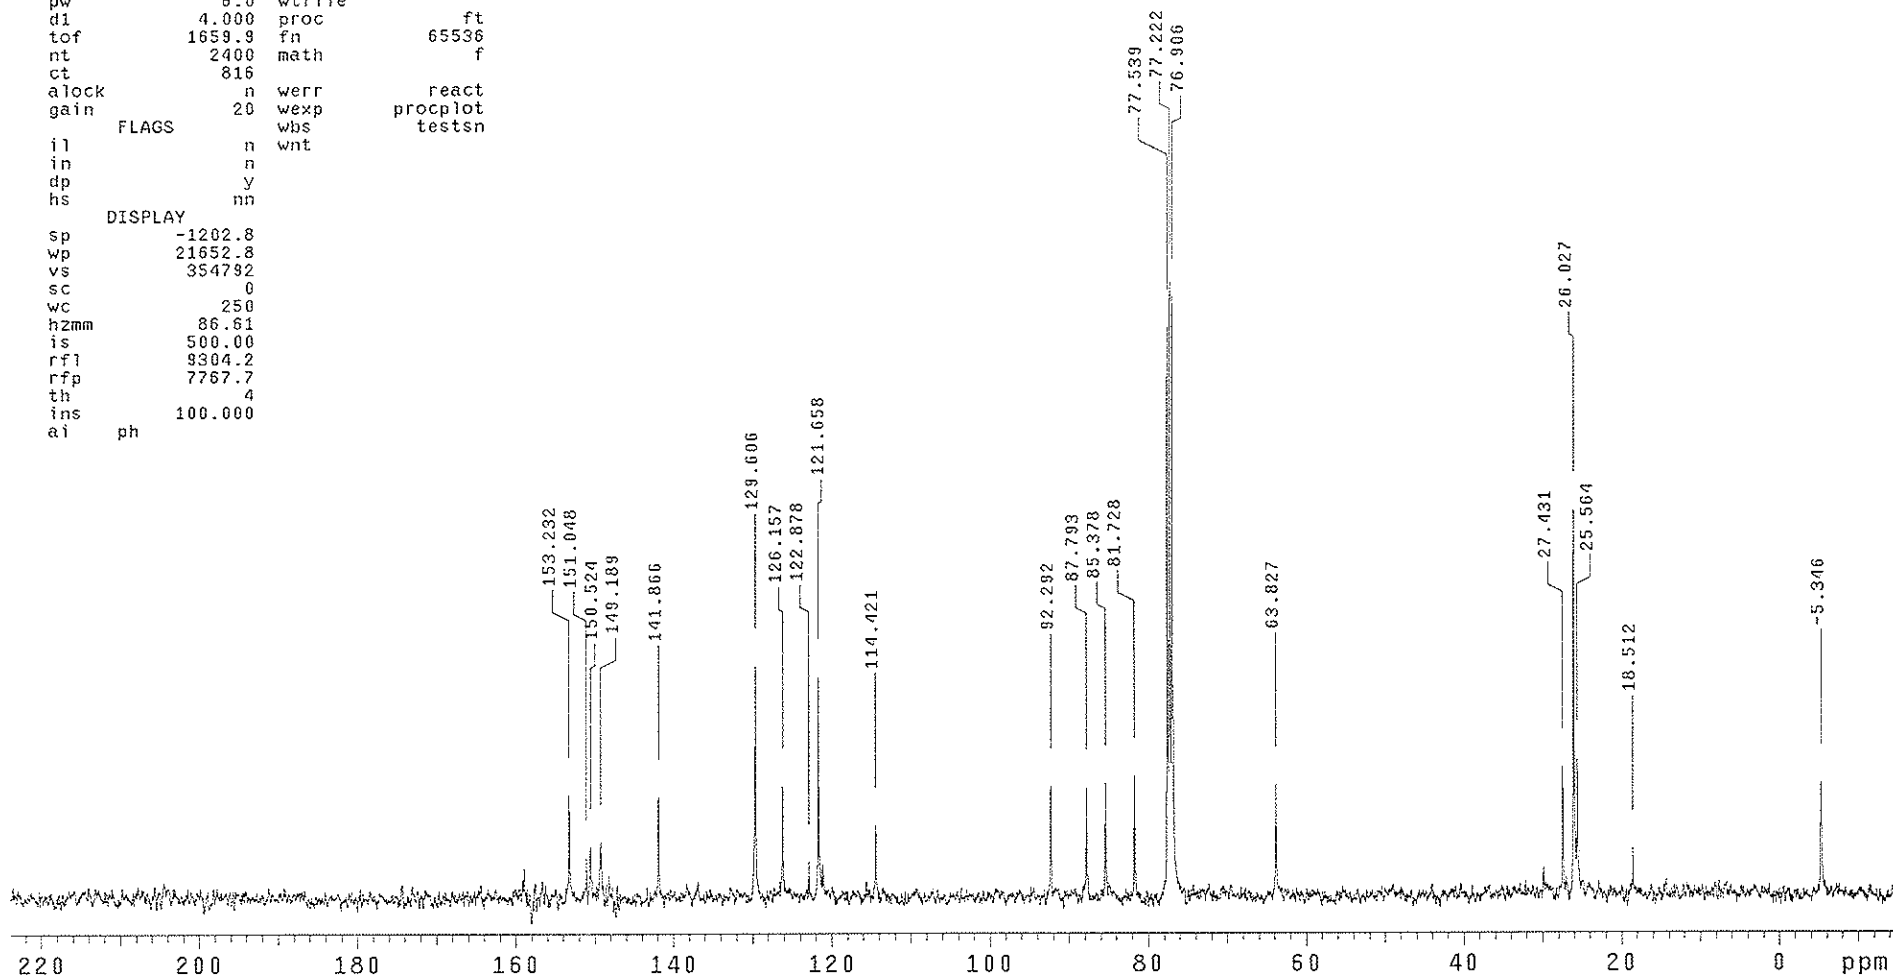

STANDARD 1H OBSERVE

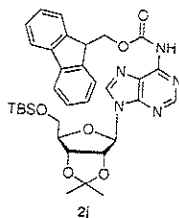

```

exp1 std1h
SAMPLE
date Apr 19 2012 dfrq DEC. & VT 399.996
solvent CDC13 dn H1
file exp dpwr 30
ACQUISITION dof 0
sfrq 399.997 dm nnn
tn H1 dmm C
at 1.999 dmf 200
np 25216 dseq
sw 6308.2 dres 1.0
fb 3600 homo n
bs 16
tpwr 58 lb 0.20
pw 10.0 wtfile
d1 1.500 proc ft
tof 950.2 fn not used
nt 240 math f
ct 176
alock n werr react
gain 20 wexp procplot
FLAGS
il n
in n
dp y
hs nn
DISPLAY
sp -118.1
wp 5031.4
vs 136
sc 0
wc 250
hzmm 20.13
is 500.00
rfl 3100.4
rfp 2308.0
th 2
ins 1.000
nm ph
    
```

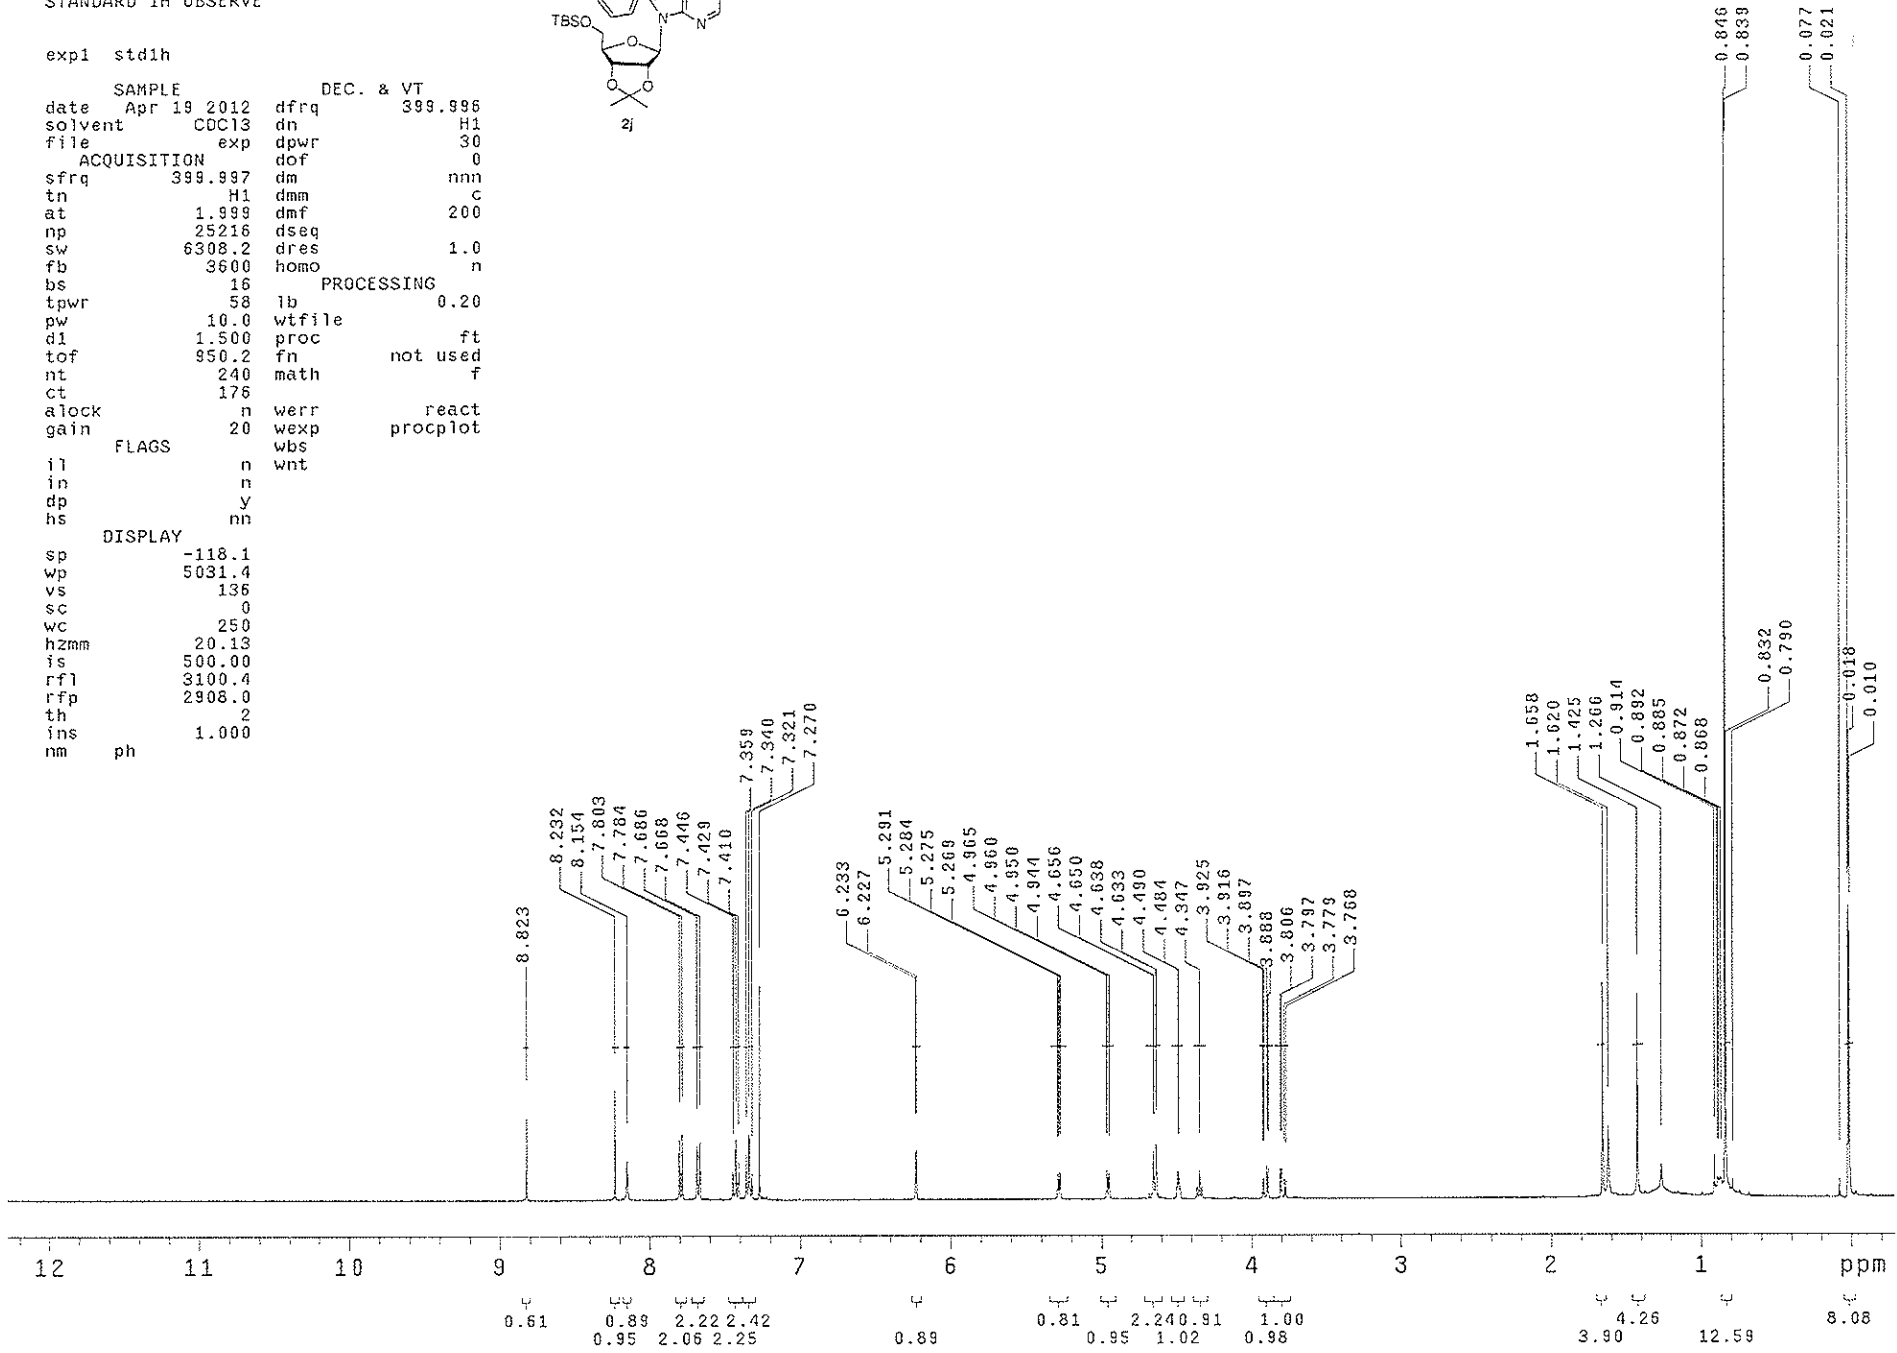

C13 STD

exp1 std1h

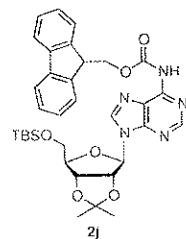

SAMPLE DEC. & VT  
date Mar 19 2012 dfrq 399.996  
solvent CDC13 dn H1  
file exp dpwr 40  
ACQUISITION dof -363.0  
sfrq 100.590 dm yyy  
tn C13 dmm w  
at 1.599 dmf 9000  
np 81344 dseq  
sw 25428.1 dres 1.0  
fb 14000 homo n  
bs 16 PROCESSING  
tpwr 58 lb 2.00  
pw 6.0 wtfile  
d1 4.000 proc ft  
tof 1659.9 fn 65536  
nt 2400 math f  
ct 1184  
alock n werr react  
gain 20 wexp procplot  
FLAGS n wbs testn  
wnt  
il n  
in n  
dp y  
hs nn  
DISPLAY  
sp -1503.1  
wp 20583.4  
vs 90000  
sc 0  
wc 250  
hzmm 82.33  
is 500.00  
rfl 9304.2  
rfp 7767.7  
th 2  
ins 100.000  
ai ph

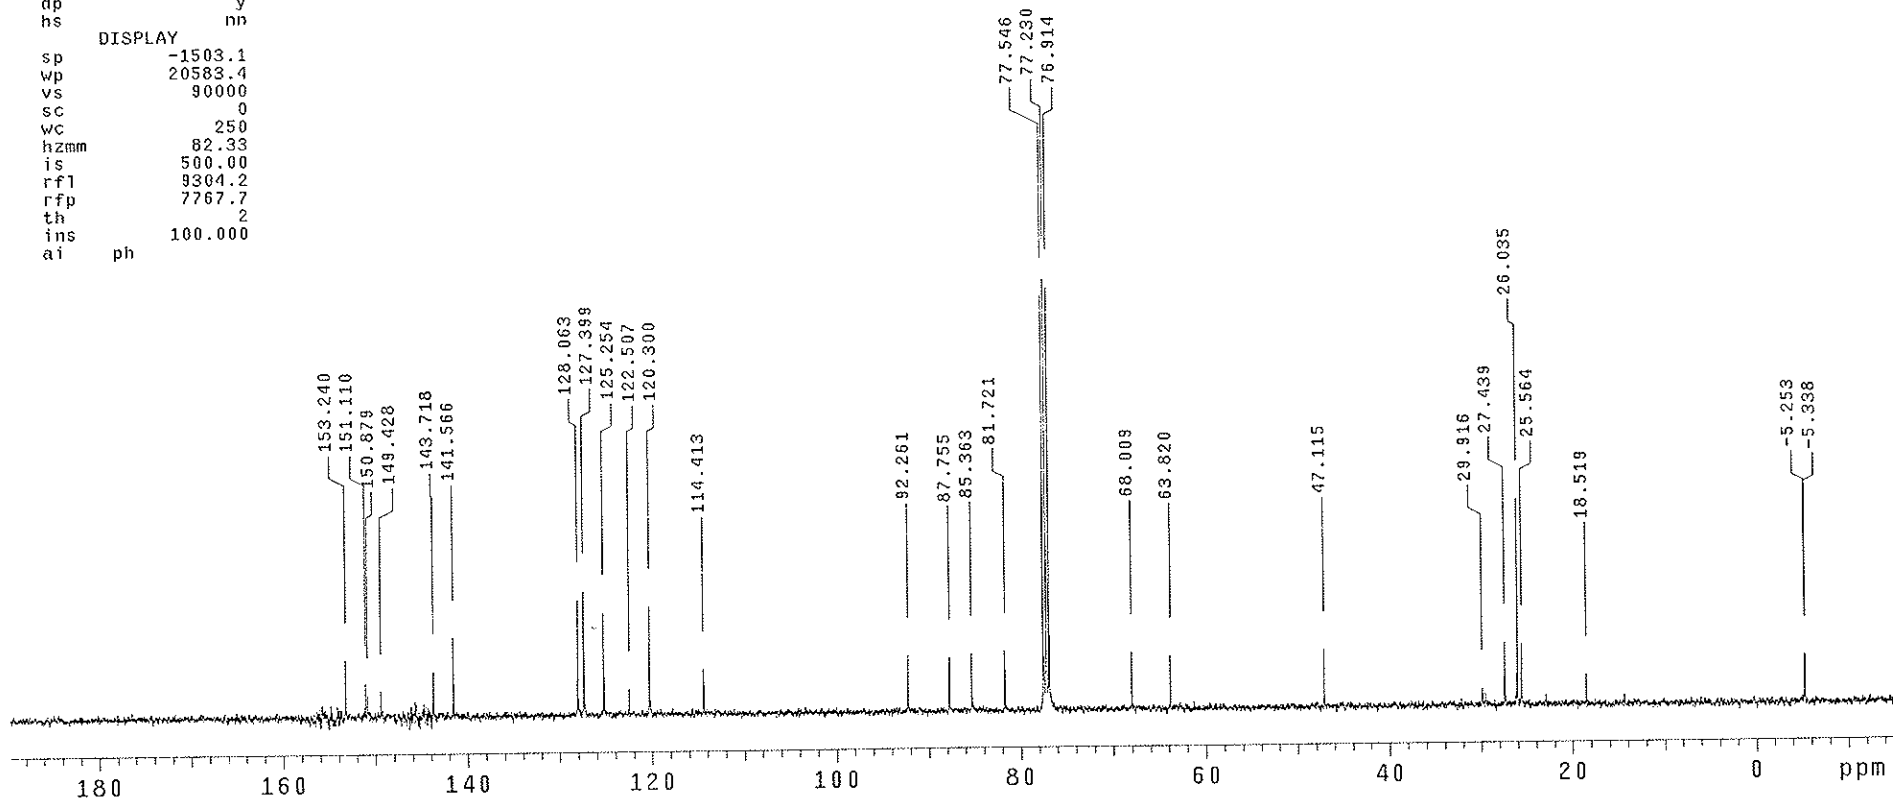



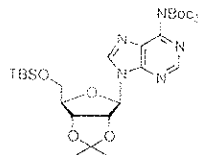

STANDARD 1H OBSERVE

expi stdih

|             |             |            |          |
|-------------|-------------|------------|----------|
| SAMPLE      |             | DEC. & VT  |          |
| date        | Aug 19 2011 | dfrq       | 399.996  |
| solvent     | CDC13       | dn         | H1       |
| file        | exp         | dpwr       | 30       |
| ACQUISITION |             | dof        | 0        |
| sfrq        | 399.997     | dm         | nmn      |
| tn          | H1          | dmm        | c        |
| at          | 1.999       | dmf        | 200      |
| np          | 25216       | dseq       |          |
| sw          | 6308.2      | dres       | 1.0      |
| fb          | 3600        | homo       | n        |
| bs          | 16          | PROCESSING |          |
| tpwr        | 58          | lb         | 0.20     |
| pw          | 10.0        | wtfile     |          |
| d1          | 1.500       | proc       | ft       |
| tof         | 950.2       | fn         | not used |
| nt          | 120         | math       | f        |
| ct          | 64          |            |          |
| alock       | n           | werr       | react    |
| gain        | 20          | wexp       | procplot |
| FLAGS       |             | wbs        |          |
| ii          | n           | wnt        |          |
| in          | n           |            |          |
| dp          | y           |            |          |
| hs          | nn          |            |          |
| DISPLAY     |             |            |          |
| sp          | -146.7      |            |          |
| wp          | 4285.5      |            |          |
| vs          | 402         |            |          |
| sc          | 0           |            |          |
| wc          | 250         |            |          |
| hzmm        | 17.14       |            |          |
| is          | 500.00      |            |          |
| rfl         | 187.9       |            |          |
| rfp         | 0           |            |          |
| th          | 2           |            |          |
| ins         | 1.000       |            |          |
| nm          | ph          |            |          |

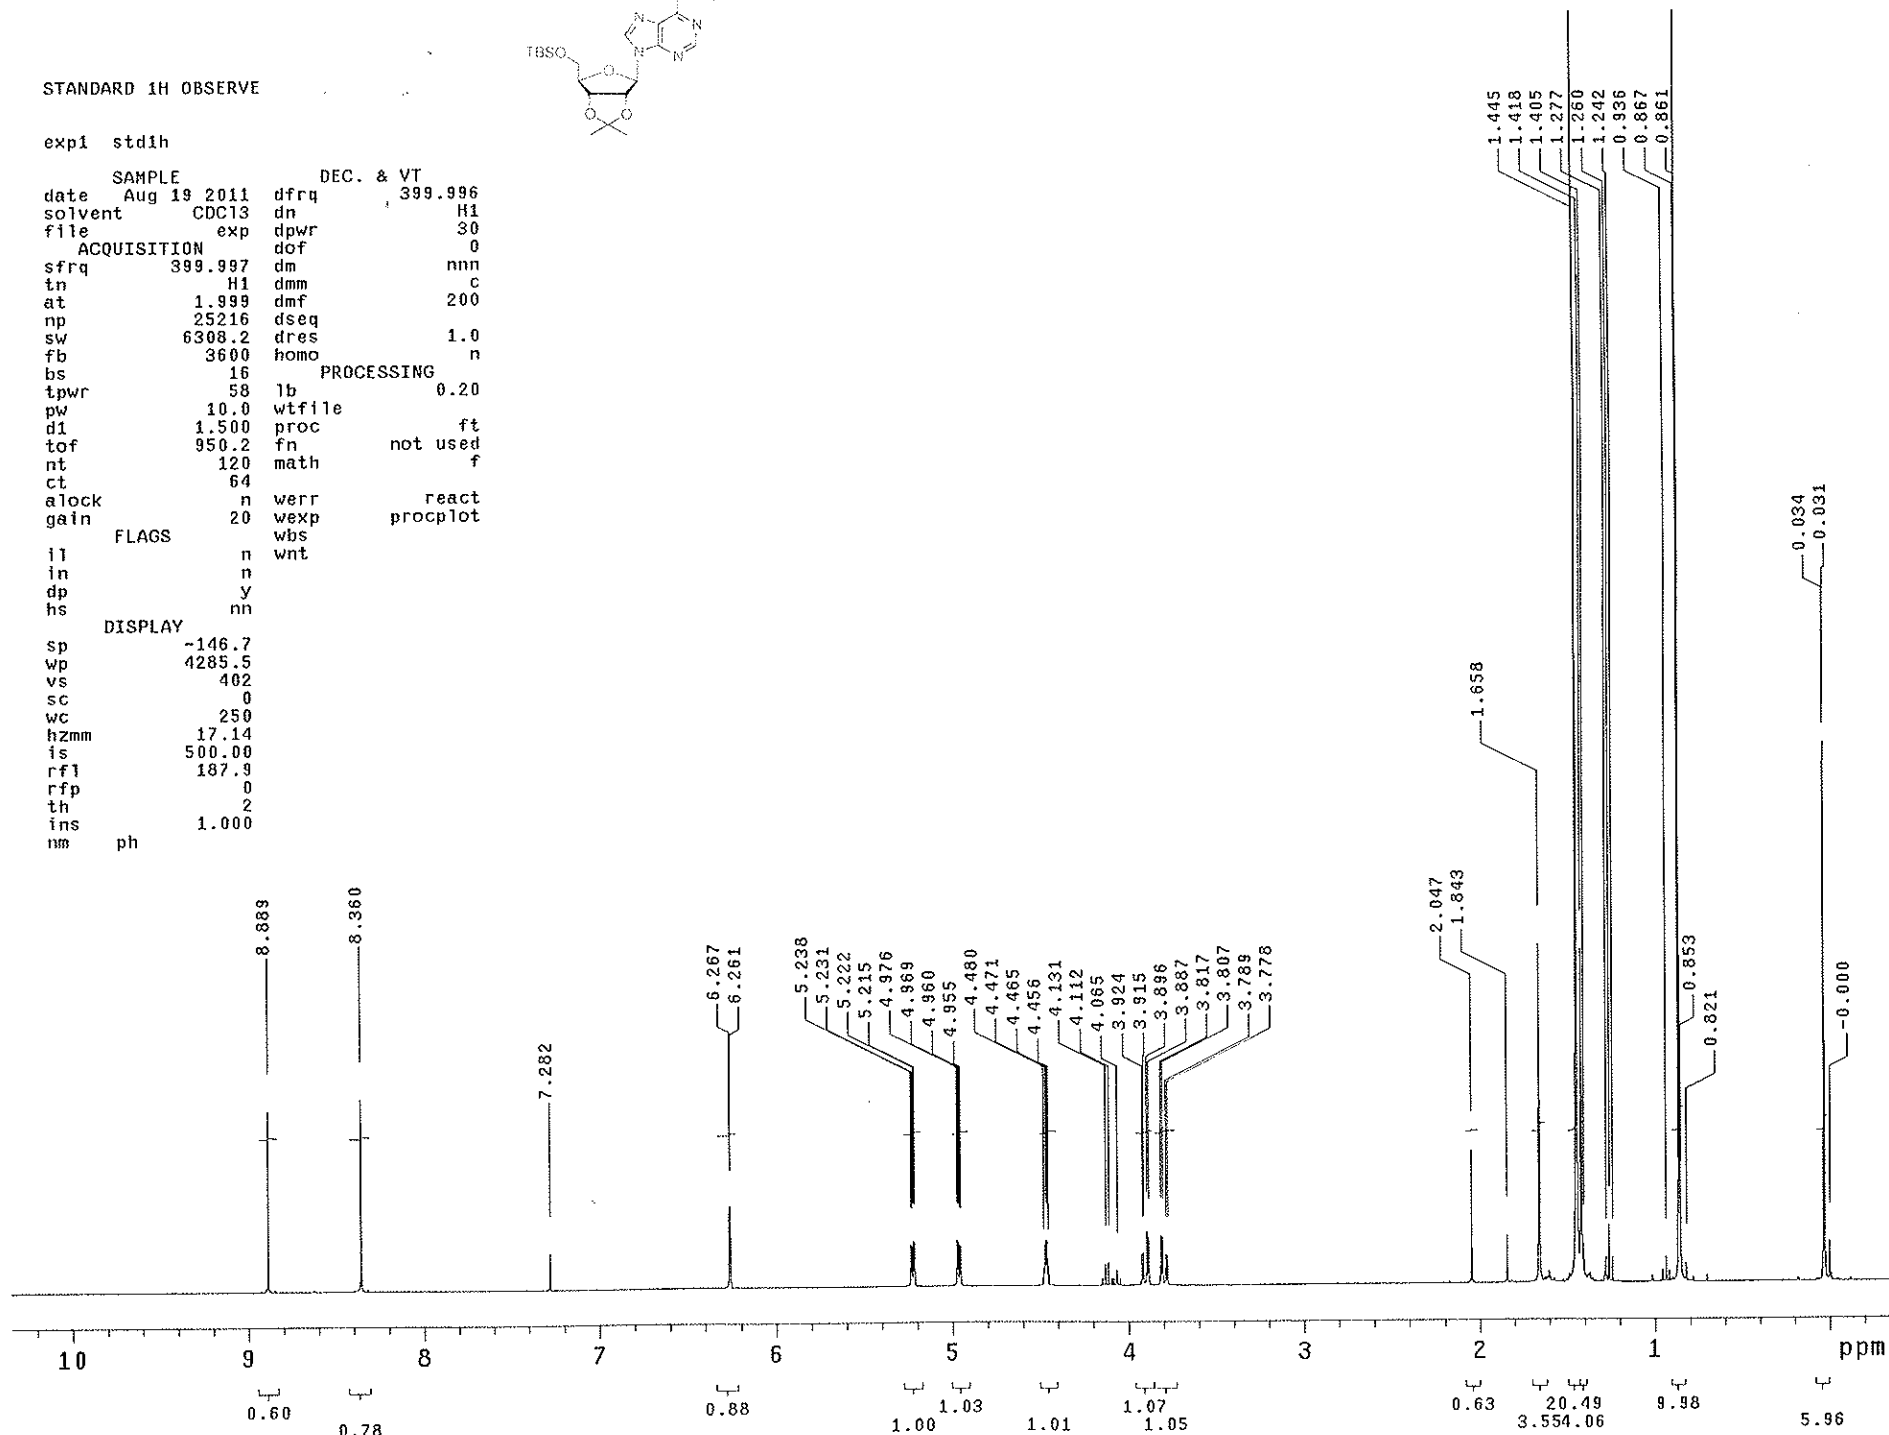

C13 STD

exp1 std1h

SAMPLE DEC. & VT  
date Aug 19 2011 dfrq 399.996  
solvent CDC13 dn H1  
file exp dpwr 40  
ACQUISITION dof -363.0  
sfrq 100.590 dm yyy  
tn C13 dmm w  
at 1.599 dmf 9000  
np 81344 dseq  
sw 25429.1 dres 1.0  
fb 14000 homo n  
bs 16 PROCESSING  
tpwr 58 lb 2.00  
pw 6.0 wfile  
dl 4.000 proc ft  
tof 1659.9 fn 65536  
nt 1200 math f  
ct 432  
alock n werr react  
gain 20 wexp proplot  
FLAGS wbs testsn  
il n wnt  
in n  
dp y  
hs nn  
DISPLAY  
sp -1139.1  
wp 19514.0  
vs 55792  
sc 0  
wc 250  
hzmm 78.06  
is 500.00  
rfl 9307.3  
rfp 7767.7  
th 3  
ins 100.000  
al ph

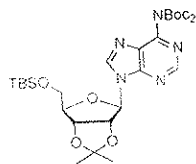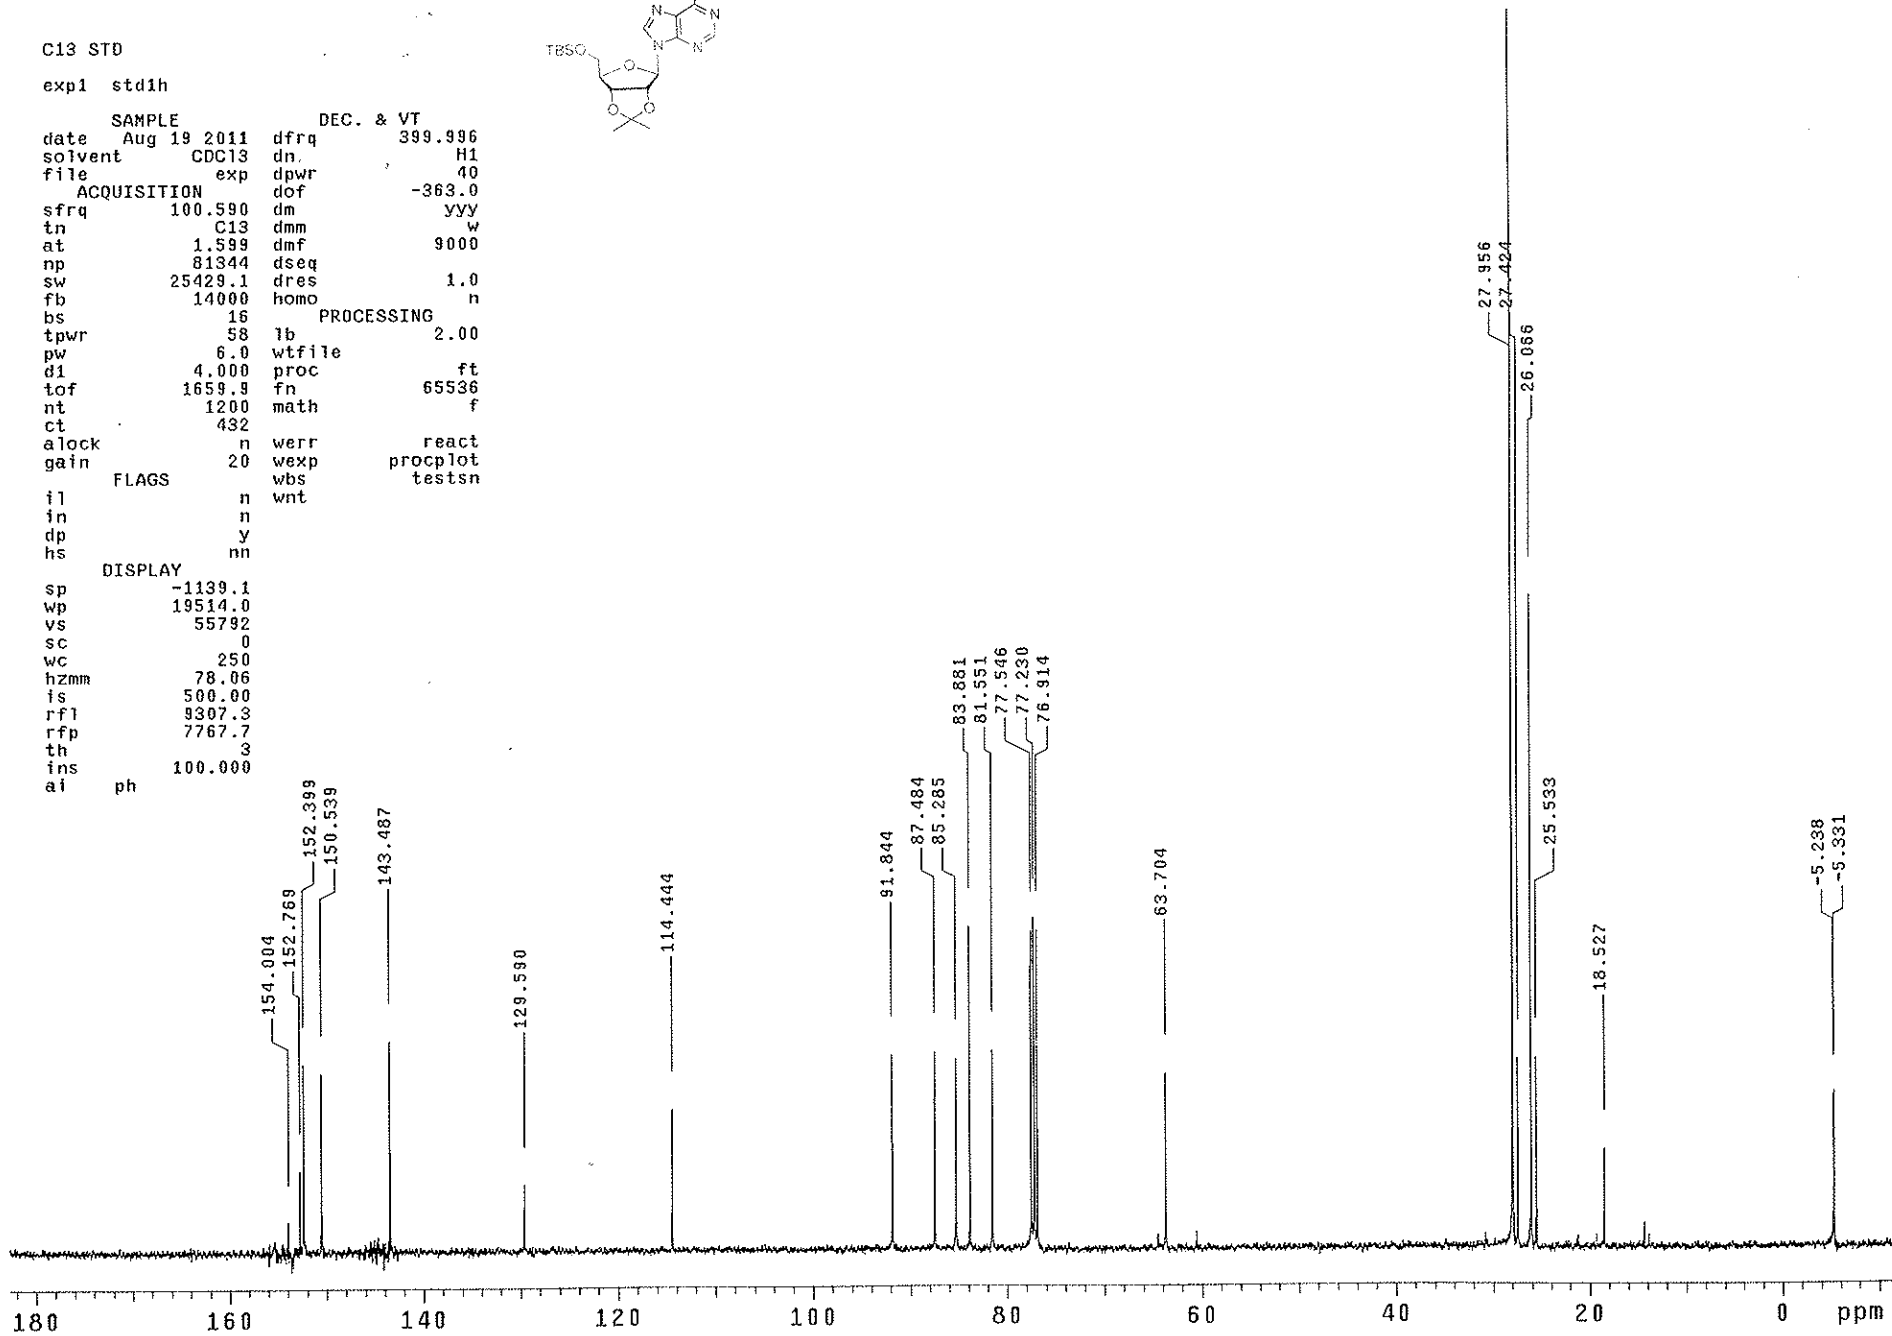

STANDARD 1H OBSERVE

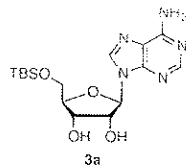

exp1 std1h

|             |             |            |          |
|-------------|-------------|------------|----------|
| SAMPLE      |             | DEC. & VT  |          |
| date        | Dec 19 2009 | dfrq       | 399.998  |
| solvent     | CD300       | dn         | H1       |
| file        | exp         | dpwr       | 30       |
| ACQUISITION |             | dof        | 0        |
| sfrq        | 399.999     | dm         | nmn      |
| tn          | H1          | dmm        | c        |
| at          | 1.999       | dmf        | 200      |
| np          | 25216       | dseq       |          |
| sw          | 6308.2      | dres       | 1.0      |
| fb          | 3600        | homo       | n        |
| bs          | 16          | PROCESSING |          |
| tpwr        | 58          | lb         | 0.20     |
| pw          | 10.0        | wtfile     |          |
| d1          | 1.500       | proc       | ft       |
| tof         | 950.2       | fn         | not used |
| nt          | 120         | math       | f        |
| ct          | 32          |            |          |
| alock       | n           | werr       | react    |
| gain        | 20          | wexp       | procplot |

FLAGS

|    |    |     |
|----|----|-----|
| il | n  | wnt |
| in | n  |     |
| dp | y  |     |
| hs | nn |     |

DISPLAY

|      |        |
|------|--------|
| sp   | -174.0 |
| wp   | 4650.2 |
| vs   | 241    |
| sc   | 0      |
| wc   | 250    |
| hzmm | 18.60  |
| is   | 500.00 |
| rfl  | 2171.6 |
| rfp  | 1948.0 |
| th   | 1      |
| ins  | 1.000  |
| nm   | ph     |

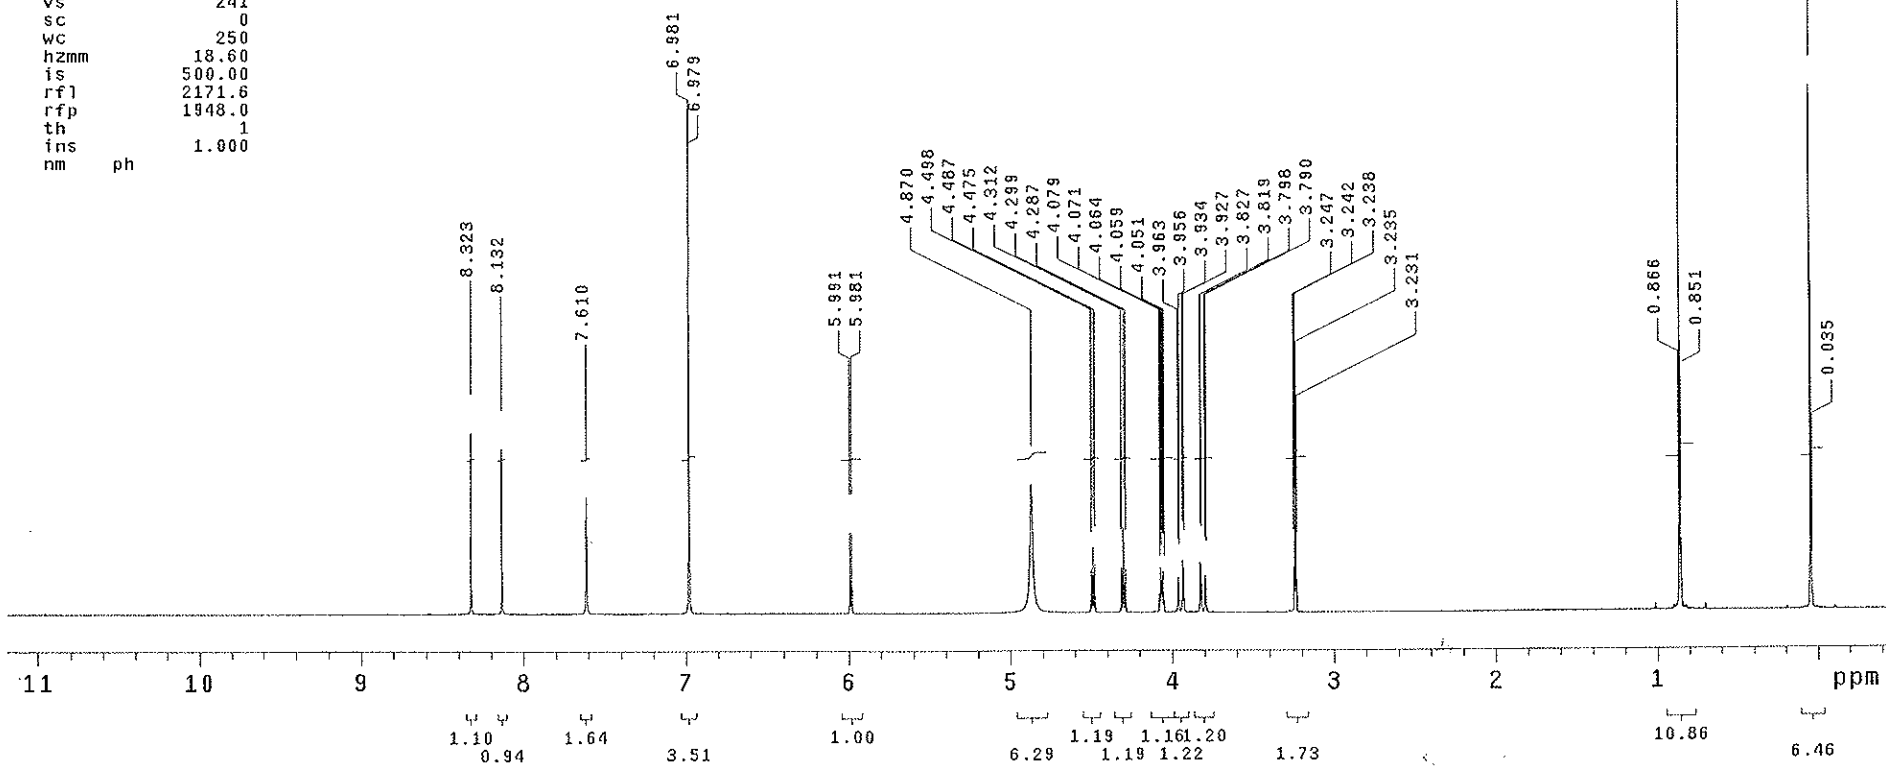

STANDARD 1H OBSERVE

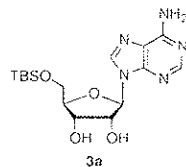

expi std1h

|             |             |            |          |
|-------------|-------------|------------|----------|
| SAMPLE      |             | DEC. & VT  |          |
| date        | Dec 19 2009 | dfrq       | 399.998  |
| solvent     | CD30D       | dn         | H1       |
| file        | exp         | dpwr       | 30       |
| ACQUISITION |             | dof        | 0        |
| sfrq        | 399.999     | dm         | nmn      |
| tn          | H1          | dmm        | c        |
| at          | 1.999       | dmf        | 200      |
| np          | 25216       | dseq       |          |
| sw          | 6308.2      | dres       | 1.0      |
| fb          | 3600        | homo       | n        |
| bs          | 16          | PROCESSING |          |
| tpwr        | 58          | lb         | 0.20     |
| pw          | 10.0        | wtfile     |          |
| d1          | 1.500       | proc       | ft       |
| tof         | 950.2       | fn         | not used |
| nt          | 120         | math       | f        |
| ct          | 32          |            |          |
| alock       | n           | werr       | react    |
| gain        | 20          | wexp       | procplot |
| FLAGS       |             | wbs        |          |
| il          | n           | wnt        |          |
| in          | n           |            |          |
| dp          | y           |            |          |
| hs          | nn          |            |          |
| DISPLAY     |             |            |          |
| sp          | 1194.1      |            |          |
| wp          | 881.0       |            |          |
| vs          | 500         |            |          |
| sc          | 0           |            |          |
| wc          | 250         |            |          |
| hzmm        | 3.52        |            |          |
| is          | 500.00      |            |          |
| rfl         | 2171.6      |            |          |
| rfp         | 1948.0      |            |          |
| th          | 1           |            |          |
| ins         | 1.000       |            |          |
| nm          | ph          |            |          |

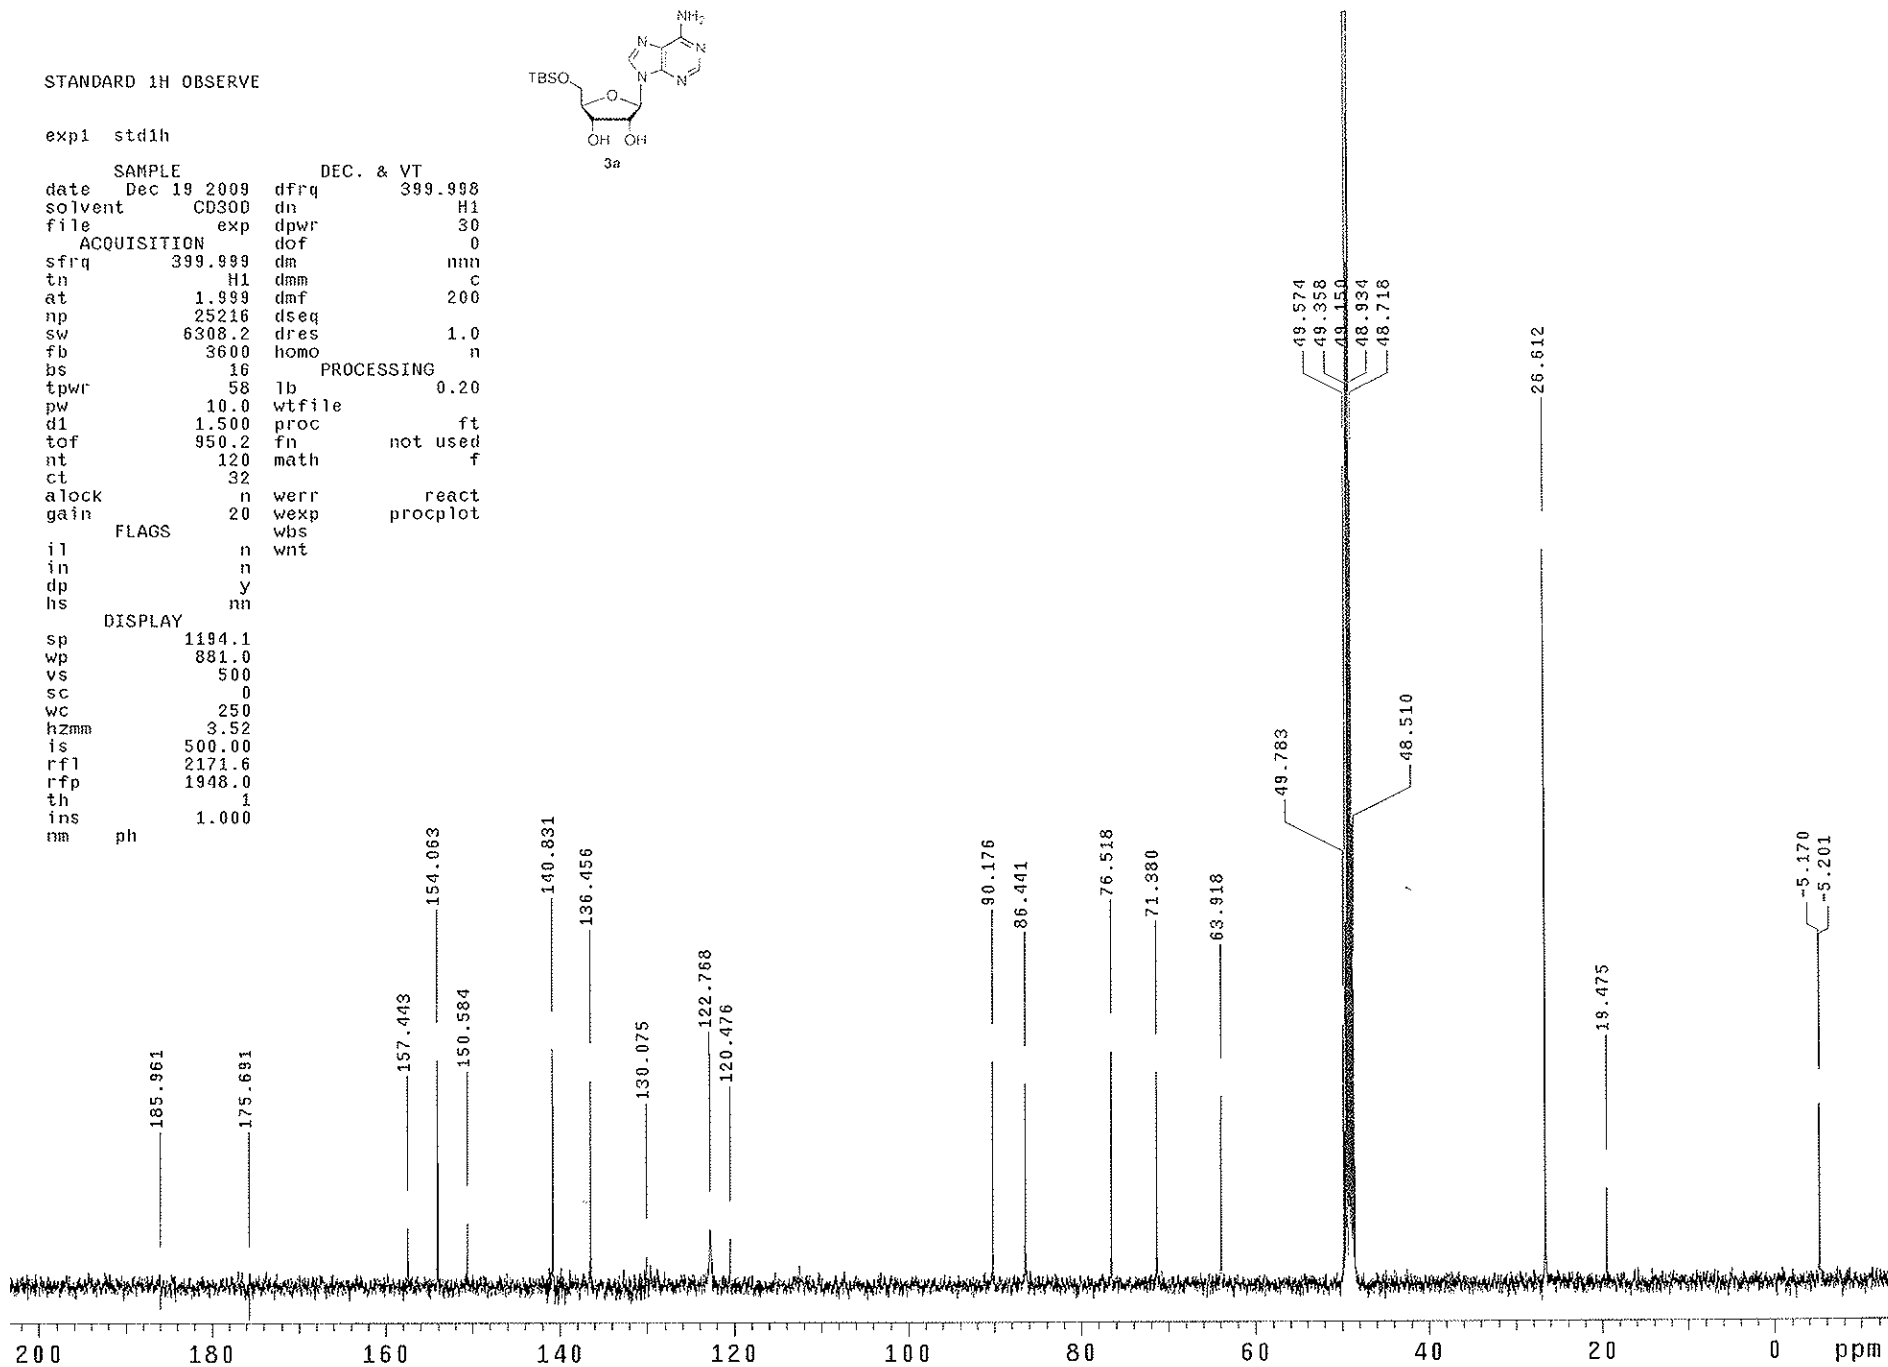

STANDARD 1H OBSERVE

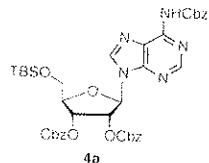

exp1 std1h

SAMPLE DEC. & VT  
 date Oct 18 2011 dfrq 399.996  
 solvent CDCl3 dn H1  
 file exp dpwr 30  
 ACQUISITION dof 0  
 sfrq 399.997 dm nnn  
 tn H1 dmm c  
 at 1.999 dmf 200  
 np 25216 dseq  
 sw 6308.2 dres 1.0  
 fb 3600 homo n  
 bs 16  
 tpwr 58 lb 0.20  
 pw 10.0 wtfile  
 d1 1.500 proc ft  
 tof 950.2 fn not used  
 nt 120 math f  
 ct 48  
 alock n werr react  
 gain 20 wexp procplot  
 wbs  
 wnt

FLAGS

ii n  
 in n  
 dp y  
 hs nn  
 s 130.1  
 p 130.1  
 z 130.1  
 mm 130.1  
 s 130.1  
 fl 130.1  
 th 130.1  
 ns 130.1  
 nm 130.1  
 ph 1.000

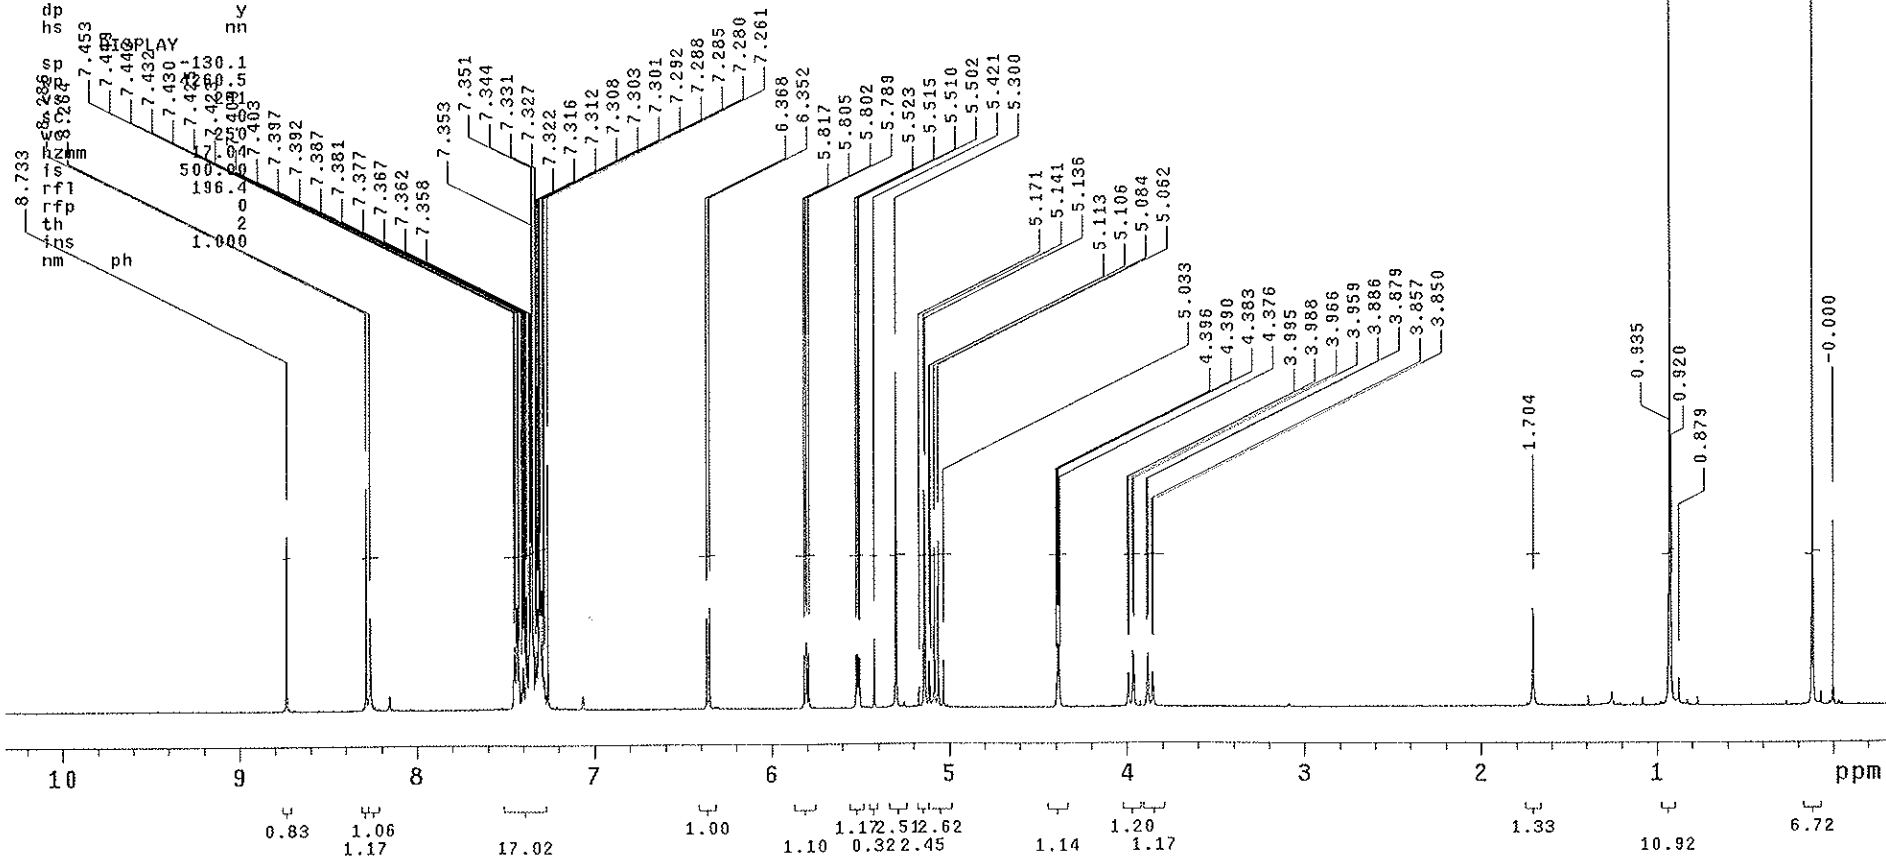

STANDARD 1H OBSERVE

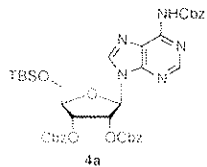

expl std1h

|             |             |           |          |
|-------------|-------------|-----------|----------|
| SAMPLE      |             | DEC. & VT |          |
| date        | Oct 18 2011 | dfrq      | 399.996  |
| solvent     | CDCl3       | dn        | H1       |
| file        | exp         | dpwr      | 30       |
| ACQUISITION |             | dof       | 0        |
| sfrq        | 399.997     | dm        | nnn      |
| tn          | H1          | dmm       | c        |
| at          | 1.999       | dmf       | 200      |
| np          | 25216       | dseq      |          |
| sw          | 6308.2      | dres      |          |
| fb          | 3600        | homo      |          |
| bs          | 16          |           |          |
| tpwr        | 58          | lb        |          |
| pw          | 10.0        | wf file   |          |
| d1          | 1.500       | proc      |          |
| tof         | 950.2       | fn        |          |
| nt          | 120         | math      |          |
| ct          | 48          |           |          |
| alock       | n           | werr      | react    |
| gain        | 20          | wexp      | procplot |
| FLAGS       |             | wbs       |          |
| il          | n           | wnt       |          |
| in          | n           |           |          |
| dp          | y           |           |          |
| hs          | nn          |           |          |
| DISPLAY     |             |           |          |
| sp          | -72.4       |           |          |
| wp          | 1906.3      |           |          |
| vs          | 241         |           |          |
| sc          | 0           |           |          |
| wc          | 250         |           |          |
| hzmm        | 7.63        |           |          |
| is          | 500.00      |           |          |
| rfl         | 196.4       |           |          |
| rfp         | 0           |           |          |
| th          | 2           |           |          |
| ins         | 1.000       |           |          |
| nm          | ph          |           |          |

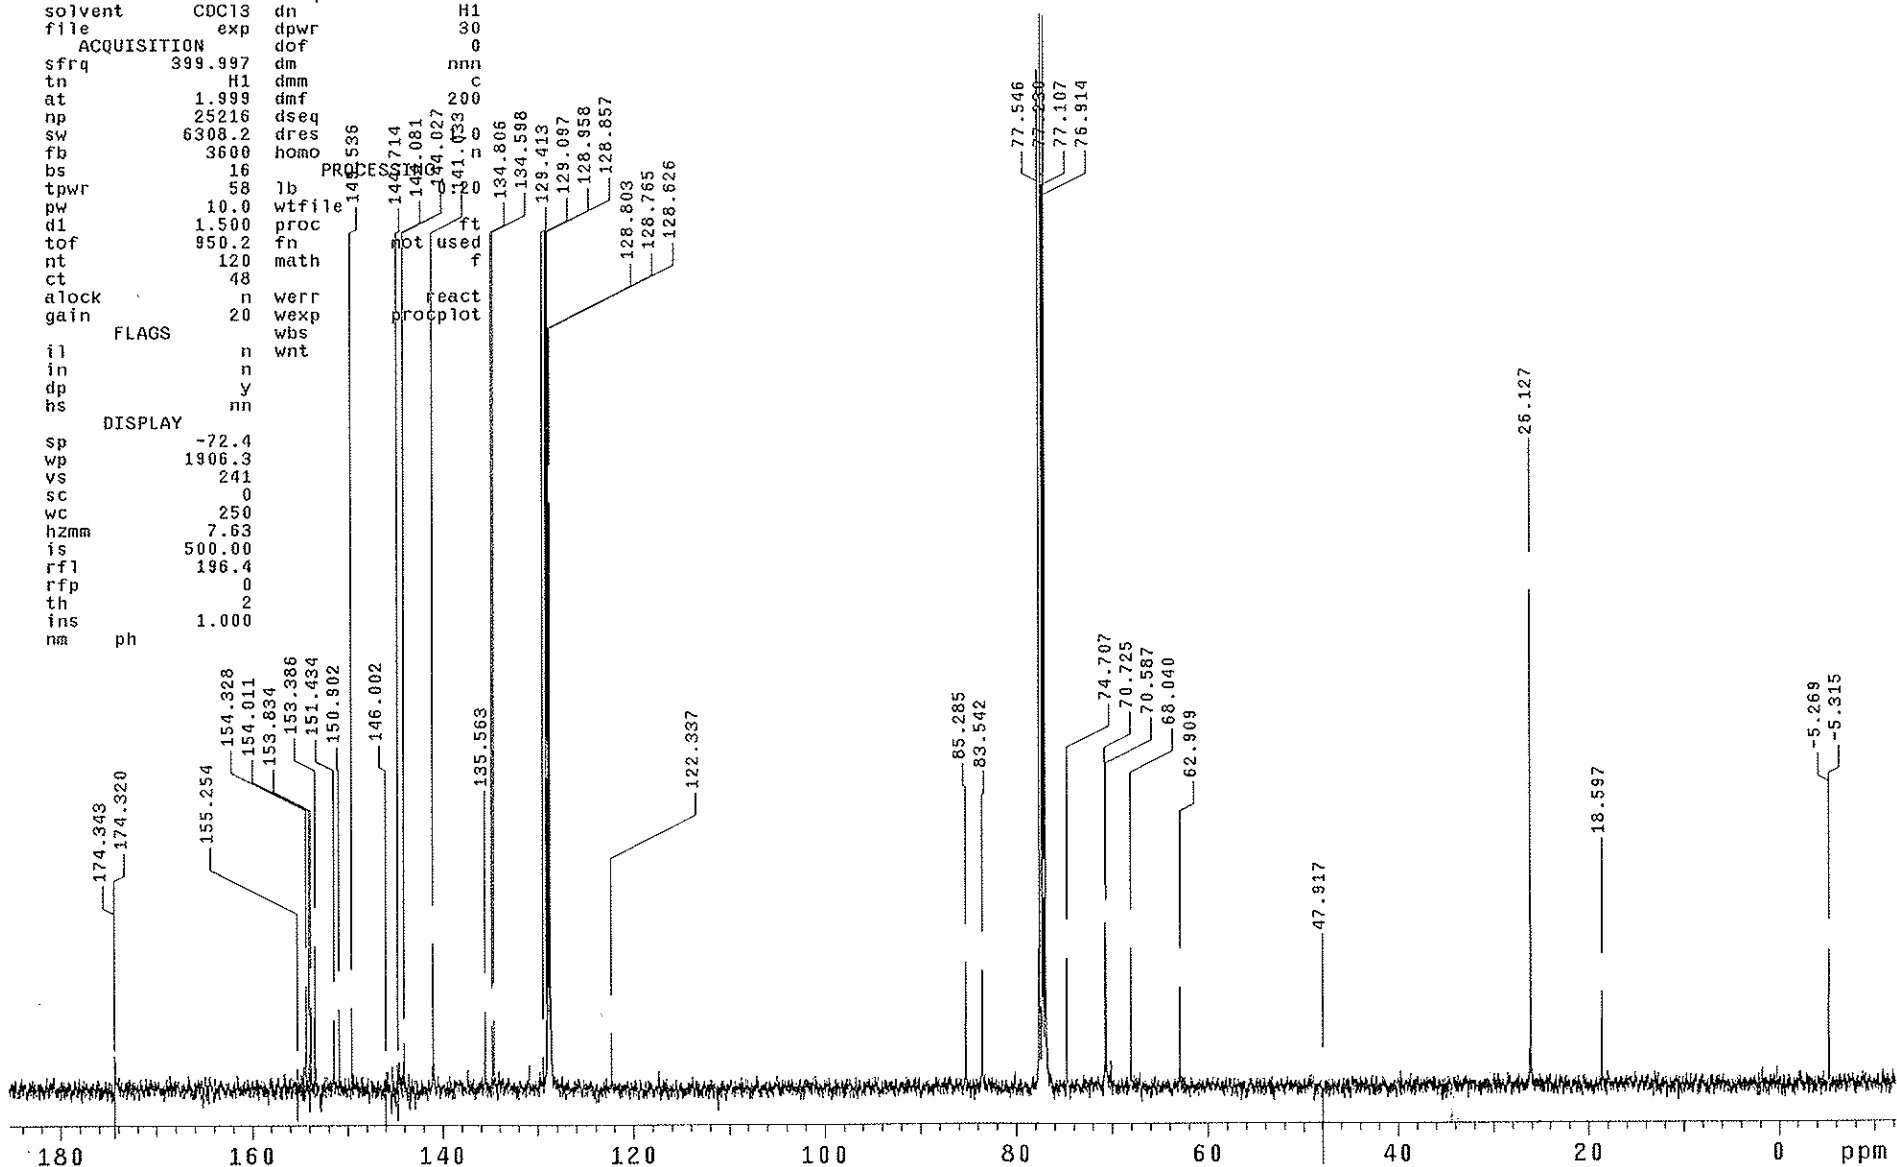

NHCbz

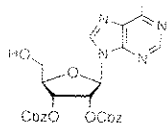

STANDARD 1H OBSERVE

exptl std1h

SAMPLE DEC. & VT  
 date Jul 18 2011 dfrq 399.996  
 solvent CDC13 dn H1  
 file exp dpwr 30  
 ACQUISITION dof 0  
 sfrq 399.997 dm nnn  
 tn H1 dmm c  
 at 1.999 dmf 200  
 np 25216 dseq  
 sw 6308.2 dres 1.0  
 fb 3600 homo n  
 bs 16  
 tpwr 58  
 pw 10.0  
 d1 1.500  
 tof 950.2  
 nt 120  
 ct 32  
 alock n  
 gain 20  
 FLAGS  
 il n  
 in n  
 dp y  
 hs nn  
 DISPLAY  
 sp -139.4  
 wp 4625.1  
 vs 121  
 sc 0  
 wc 250  
 hzmm 18.50  
 is 500.00  
 rfl 197.1  
 rfp 0  
 th 2  
 ins 1.000  
 nm ph

PROCESSING

lb 0.20  
 wtfile  
 prog  
 fn  
 math  
 werr  
 wexp  
 wbs  
 wft

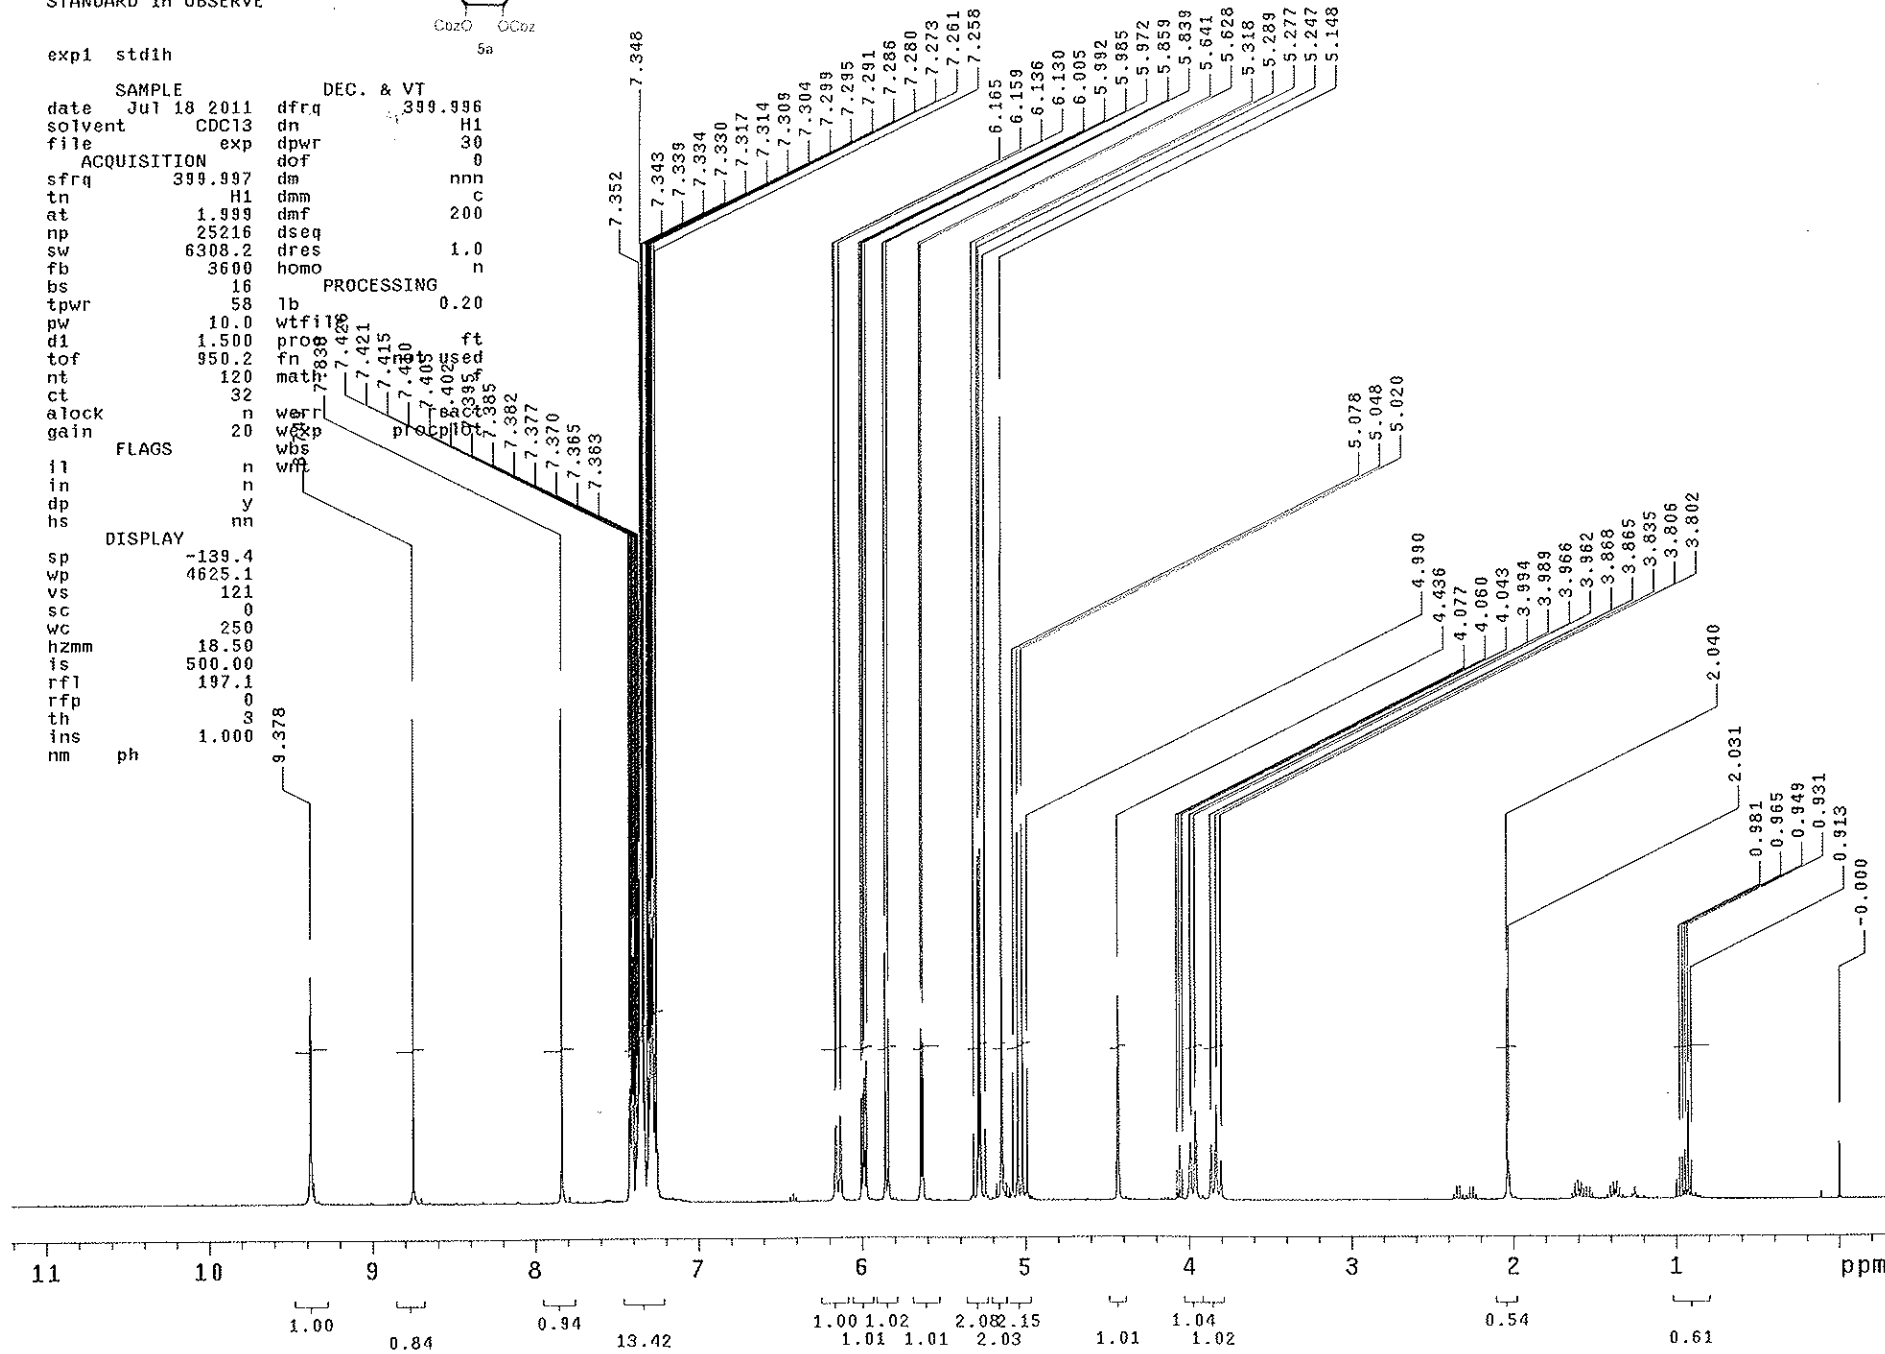

STANDARD 1H OBSERVE

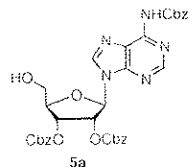

exp1 std1h

SAMPLE DEC. & VT  
 date JUL 18 2011 dfrq 399.996  
 solvent CDCl3 dn H1  
 file exp dpwr 30  
 ACQUISITION dof 0  
 sfrq 399.997 dm nnn  
 tn H1 dmm 200.0  
 at 1.999 dmf 134.436  
 np 25216 dseq 128.842  
 sw 6308.2 dres 128.757  
 fb 3600 homo  
 bs 16  
 tpwr 58 lb 0.20  
 pw 10.0 wtfile  
 dl 1.500 proc ft  
 tof 950.2 fn not used  
 nt 120 math f  
 ct 32  
 alock n werr react  
 gain 20 wexp procplot  
 FLAGS  
 il n wnt  
 in n  
 dp y  
 hs nn  
 DISPLAY  
 sp 316.5  
 wp 1566.4  
 vs 121  
 sc 0  
 wc 250  
 hzmm 6.27  
 is 500.00  
 rfl 197.1  
 rfp 0  
 th 3  
 ins 1.000  
 nm ph

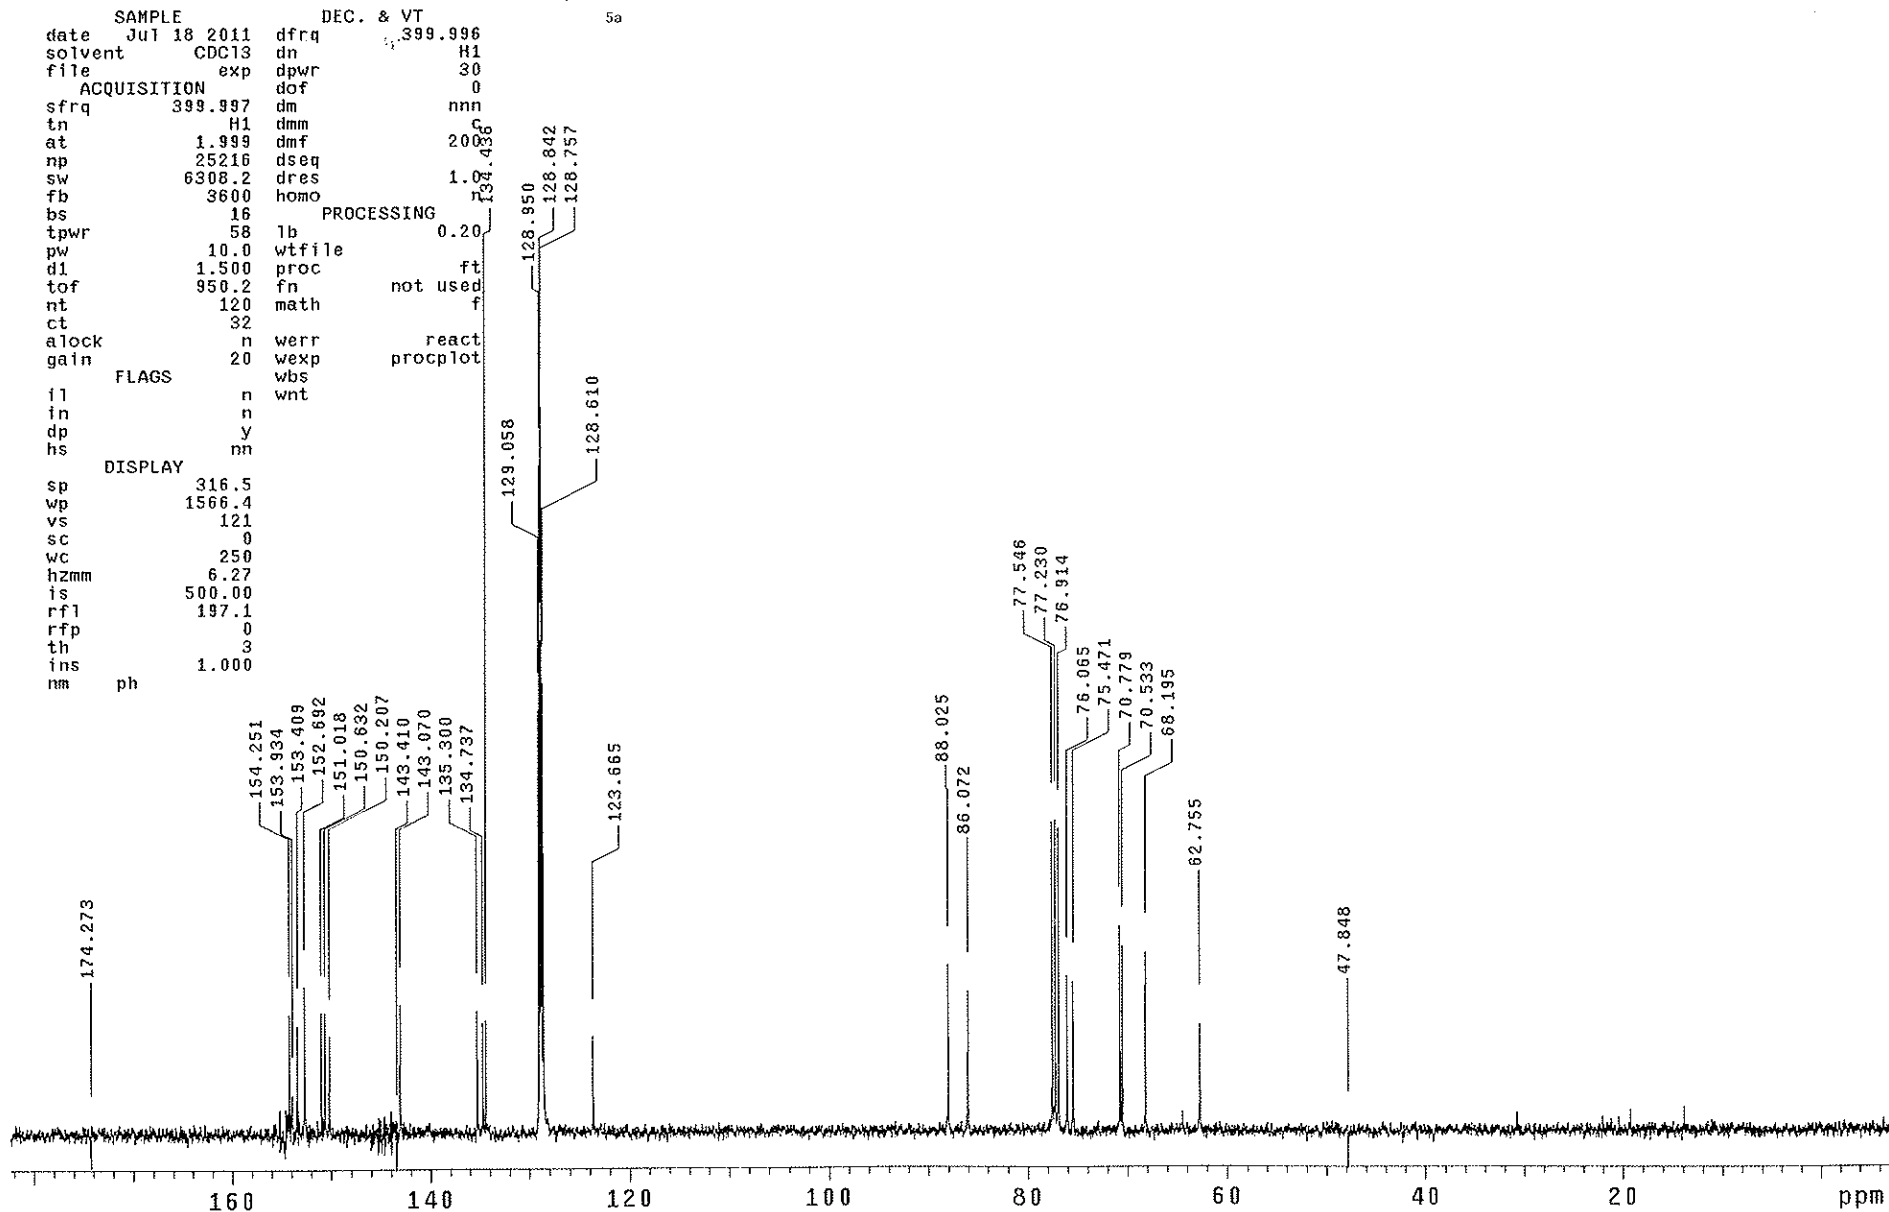





C13 STD

expl std1h

SAMPLE DEC. & VT  
date Jul 28 2011 dfrq 399.996  
solvent CDC13 dn H1  
file exp dpwr 40  
ACQUISITION dof -363.0  
sfrq 100.590 dm VVY  
tn C13 dmm w  
at 1.599 dmf 9000  
np 81344 dseq  
sw 25429.1 dres 1.0  
fb 14000 homo n  
bs 16 PROCESSING  
tpwr 58 lb 2.00  
pw 6.0 wtfile  
di 4.000 proc ft  
tof 1659.9 fn 65536  
nt 1200 math f  
ct 416  
alock n werr react  
gain 20 wexp procplot  
          wbs testsn  
          wnt  
FLAGS  
il n  
in n  
dp Y  
hs nn  
DISPLAY  
sp -638.6  
wp 22120.8  
vs 183076  
sc 0  
wc 250  
hzmm 88.48  
is 500.00  
rfl 9308.0  
th 7767.7  
ins  
ai

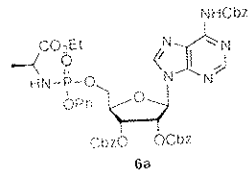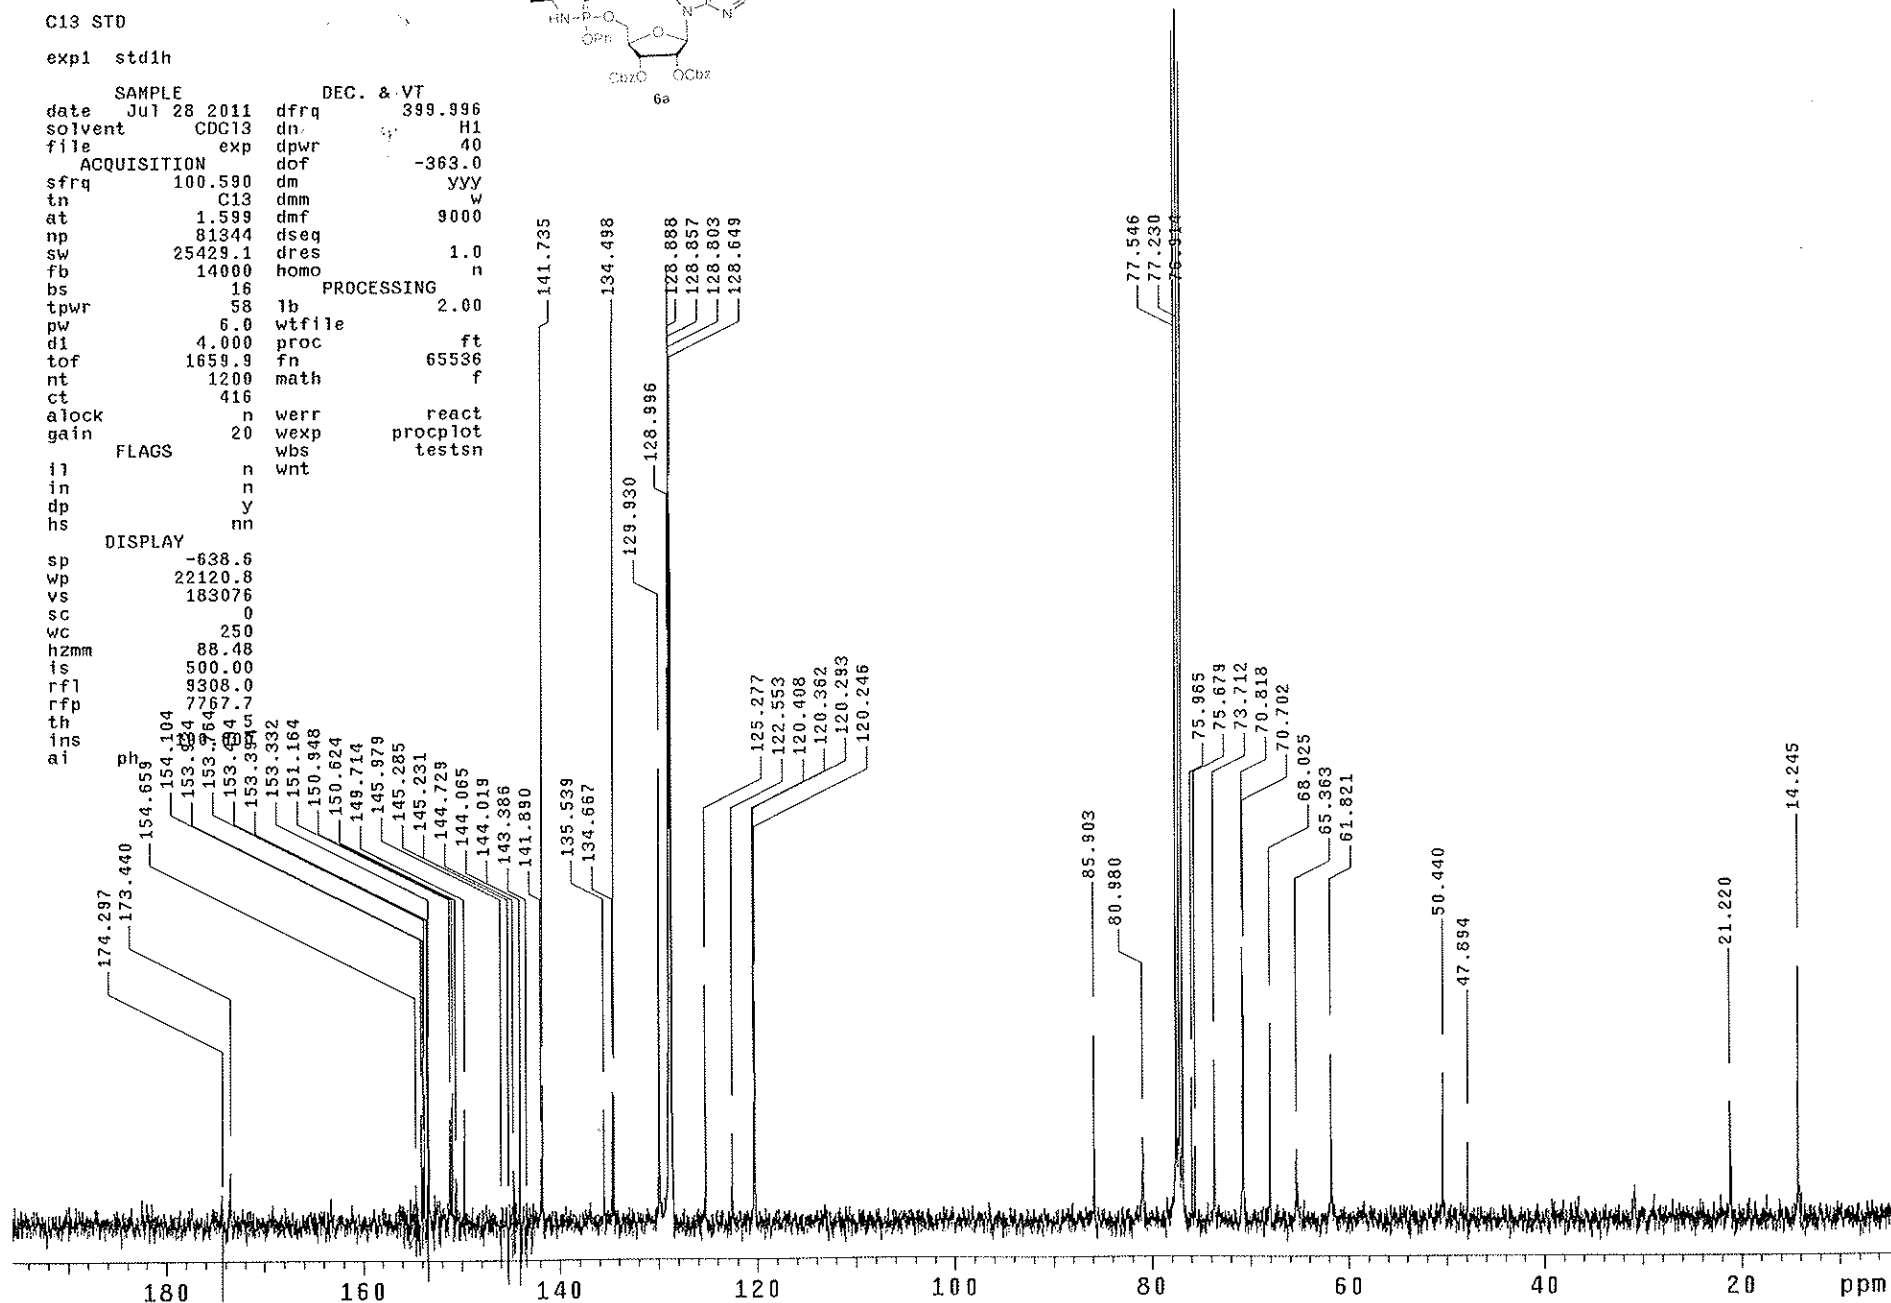

C13 STD

exp1 std1h

```
SAMPLE          DEC. & VT
date Jul 28 2011 dfrq 399.996
solvent CDC13   dn  H1
file exp       dpwr 40
ACQUISITION    dof -363.0
sfrq 100.590   dm  VVY
tn C13        dmm  W
at 1.599      dmf  2000
np 81344      dseq
sw 25429.1    dres 0.10
fb 14000      homo n
bs 16        PROCESSING
tpwr 58       1b  2.00
pw 6.0       wfile
dl 4.000     proc  ft
tof 1659.9   fn  65336
nt 1200      math  f
ct 416
alock n       werr  rect
gain 20      wexp  procpot
          wbs  testsn
          wnt

FLAGS
il n
in n
dp y
hs nn

DISPLAY
sp 1199.1
wp 2439.2
vs 183076
sc 0
wc 250
hzmm 9.76
is 500.00
rf1 9308.0
rfp 7767.7
th 5
ins 100.000
ai ph
```

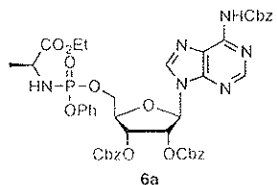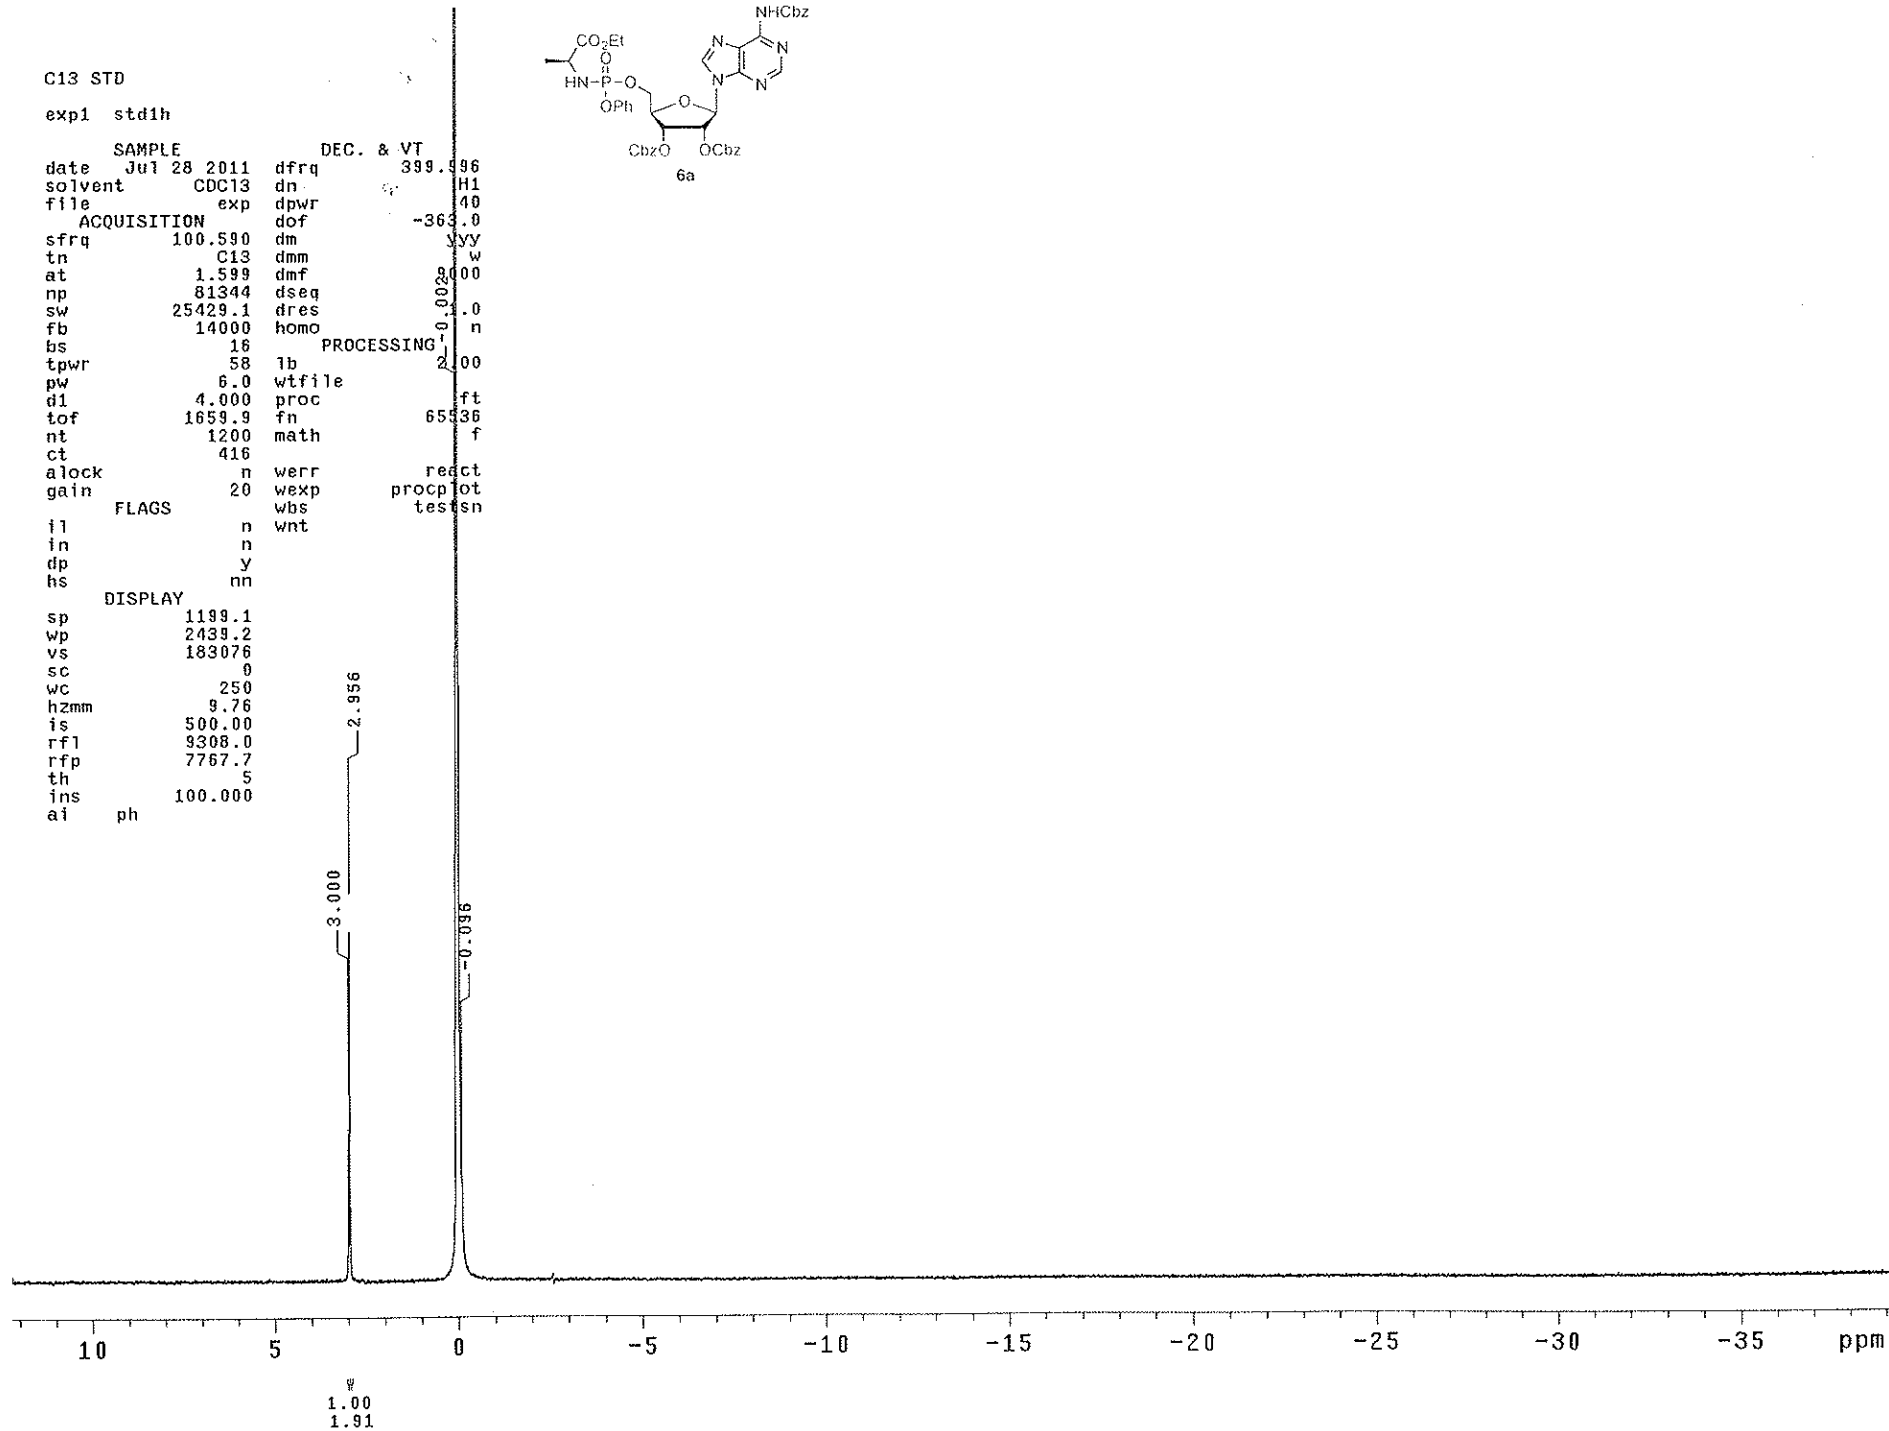

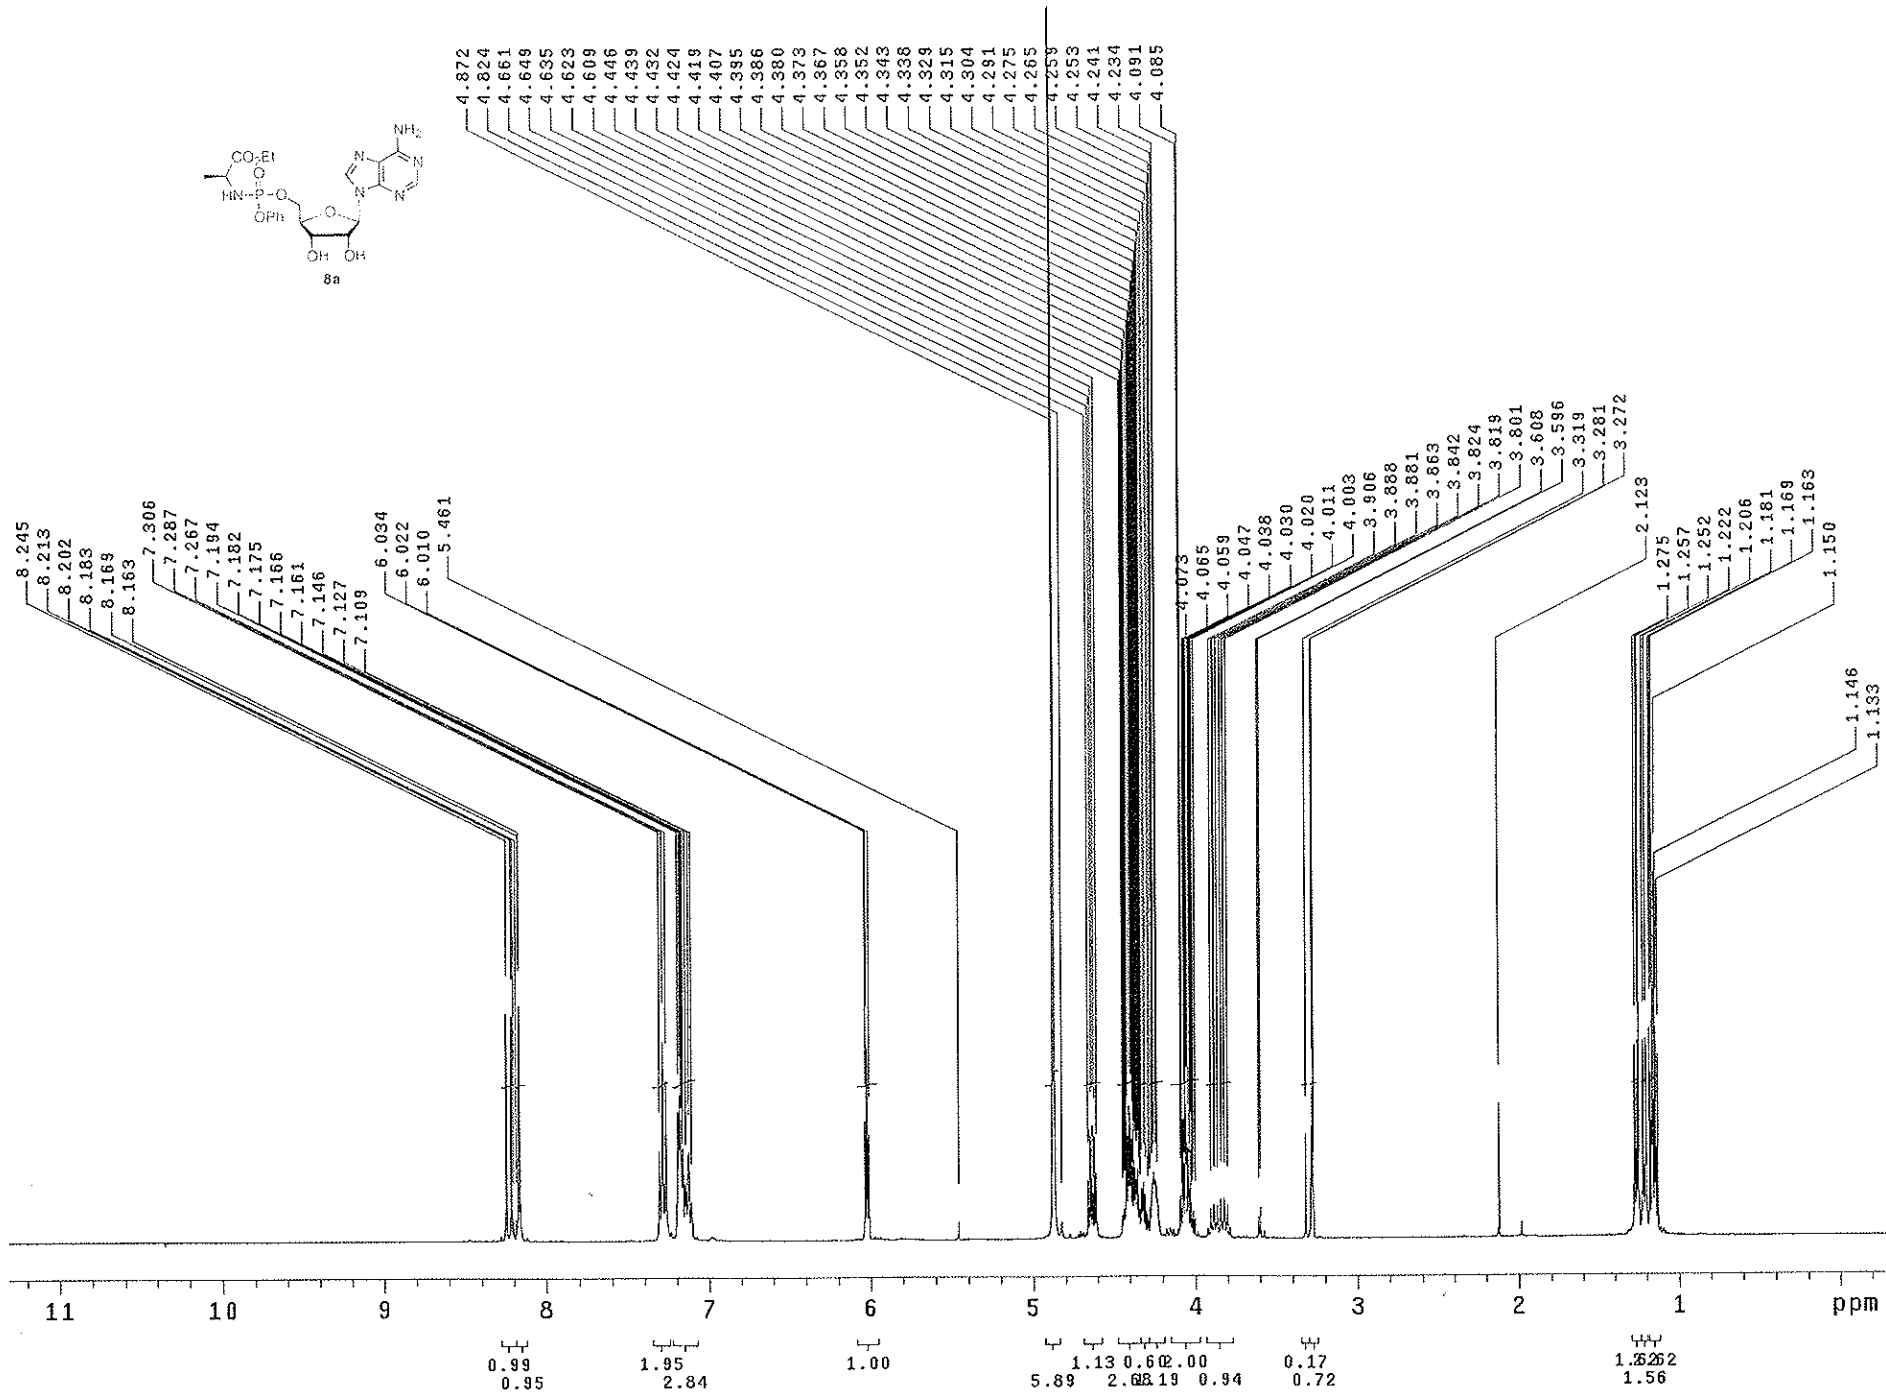

C13 STD

exp1 std1h

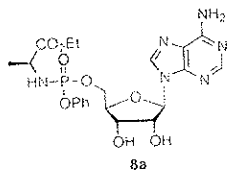

SAMPLE DEC. & VT  
date May 6 2010 dfrq 399.997  
solvent CD300 dn H1  
file exp dpwr 40  
ACQUISITION dof -363.0  
sfrq 100.590 dm yyy  
tn C13 dmm w  
at 1.599 dmf 9000  
np 81344 dseq  
sw 25429.1 dres 1.0  
fb 14000 homo n  
bs 16  
tpwr 58 lb PROCESSING 2.00  
pw 7.0 wtfile  
dl 2.000 proc ft  
tof 1659.9 fn 65536  
nt 1200 math f  
ct 496  
alock n werr react  
gain 20 wexp procplot  
wbs testn  
wnt  
FLAGS  
il n  
in n  
dp y  
hs nn  
DISPLAY  
sp -568.1  
wp 20951.3  
vs 147510  
sc 0  
wc 250  
hzmm 83.81  
is 500.00  
rfl 6346.6  
rfp 4943.5  
th 4  
ins 100.000  
ai ph

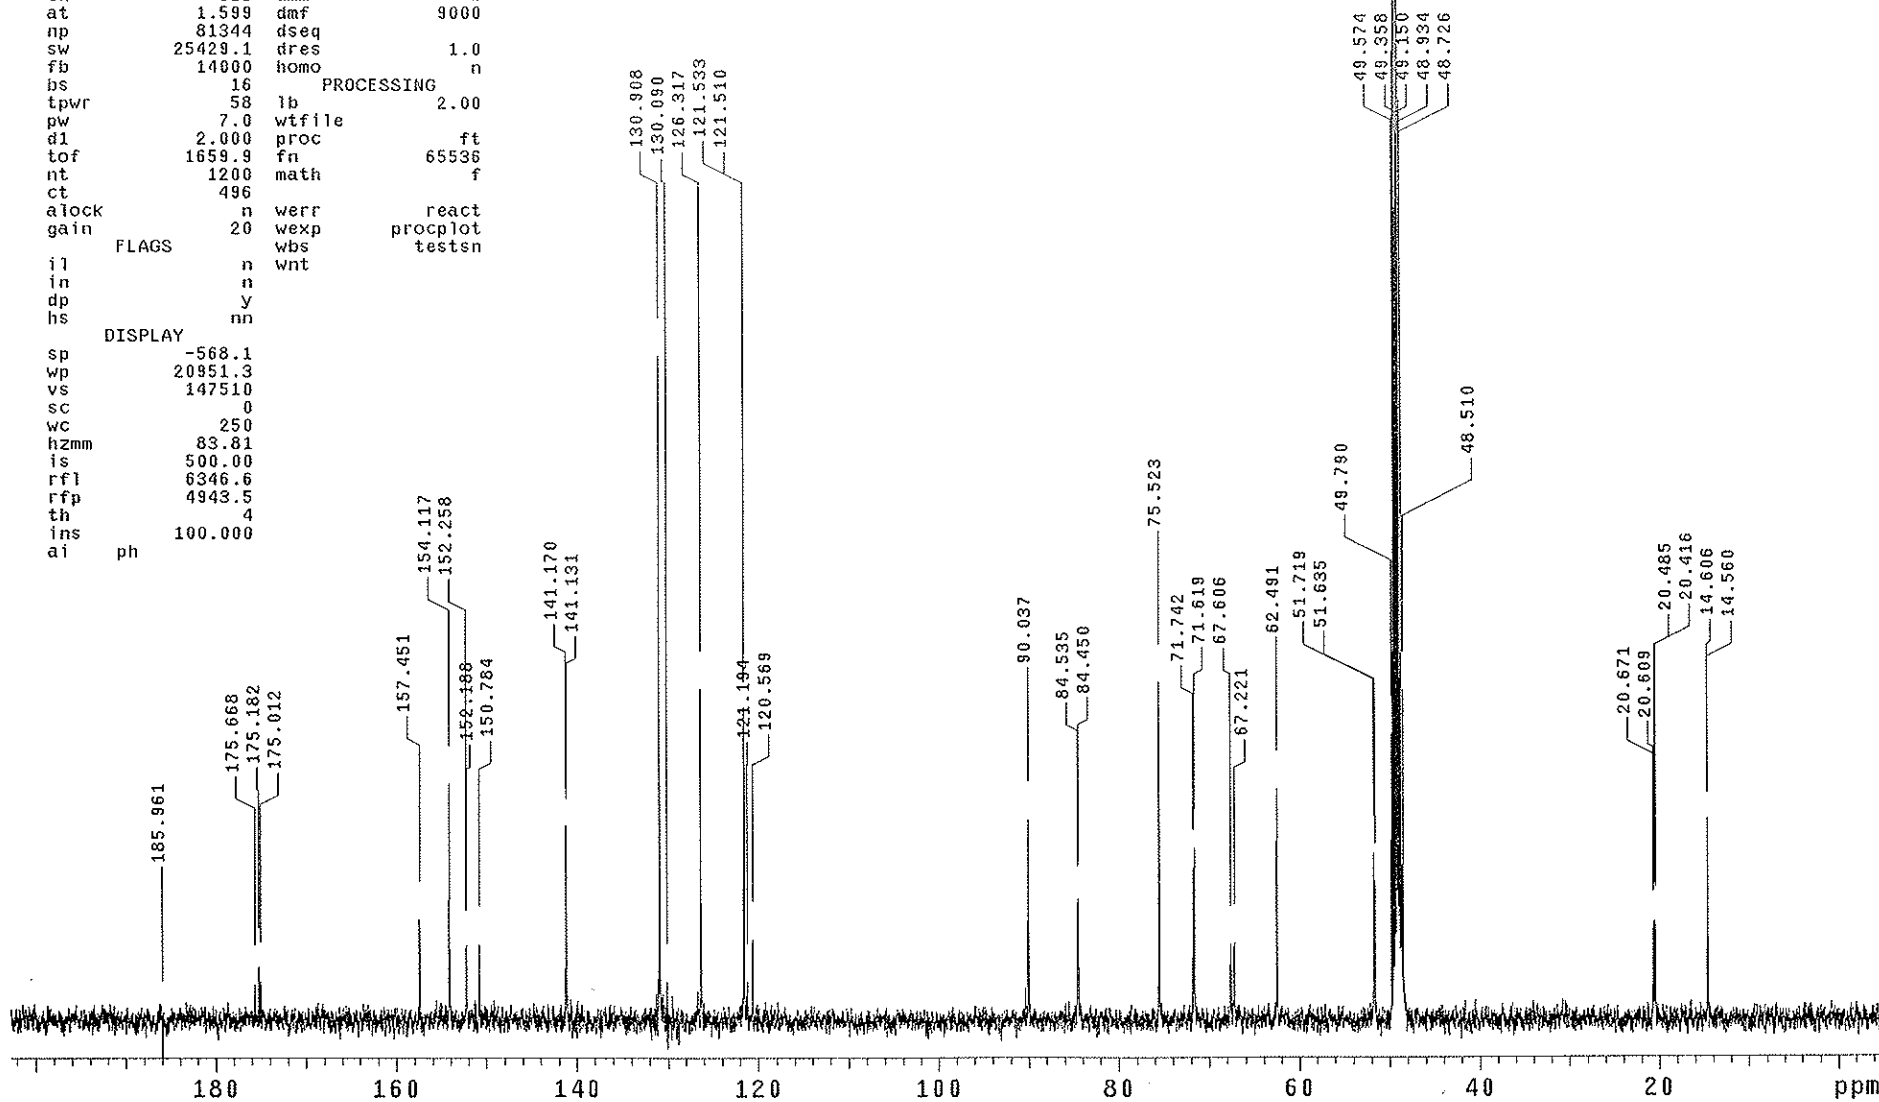

P31 STD

exp1 std1h

| SAMPLE      |            | DEC. & VT |          |
|-------------|------------|-----------|----------|
| date        | May 7 2010 | dfrq      | 399.997  |
| solvent     | CD3OD      | dn        | H1       |
| file        | exp        | dpwr      | 40       |
| ACQUISITION |            | dof       | -363.0   |
| sfrq        | 161.919    | dm        | yyy      |
| tn          | P31        | dmm       | w        |
| at          | 2.134      | dmf       | 9000     |
| np          | 35520      | dseq      |          |
| sw          | 8321.2     | dres      | 1.0      |
| fb          | 4600       | homo      | n        |
| PROCESSING  |            |           |          |
| bs          | 16         | lb        | 0.34     |
| tpwr        | 56         | wfile     |          |
| pw          | 15.0       | proc      | ft       |
| d1          | 2.000      | fn        | not used |
| tof         | -2517.0    | math      | f        |
| nt          | 120        |           |          |
| ct          | 80         |           |          |
| alock       | n          | werr      | react    |
| gain        | 20         | wexp      | procplot |
|             |            | wbs       | testsn   |
|             |            | wnt       |          |
| FLAGS       |            |           |          |
| il          | n          |           |          |
| in          | n          |           |          |
| dp          | y          |           |          |
| hs          | nn         |           |          |
| DISPLAY     |            |           |          |
| sp          | -1837.1    |           |          |
| wp          | 3641.1     |           |          |
| vs          | 22192      |           |          |
| sc          | 0          |           |          |
| wc          | 250        |           |          |
| hzmm        | 14.56      |           |          |
| is          | 500.00     |           |          |
| rfl         | 6232.7     |           |          |
| rfp         | 0          |           |          |
| th          | 20         |           |          |
| ins         | 1.000      |           |          |
| ai          | ph         |           |          |

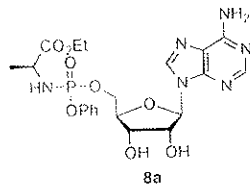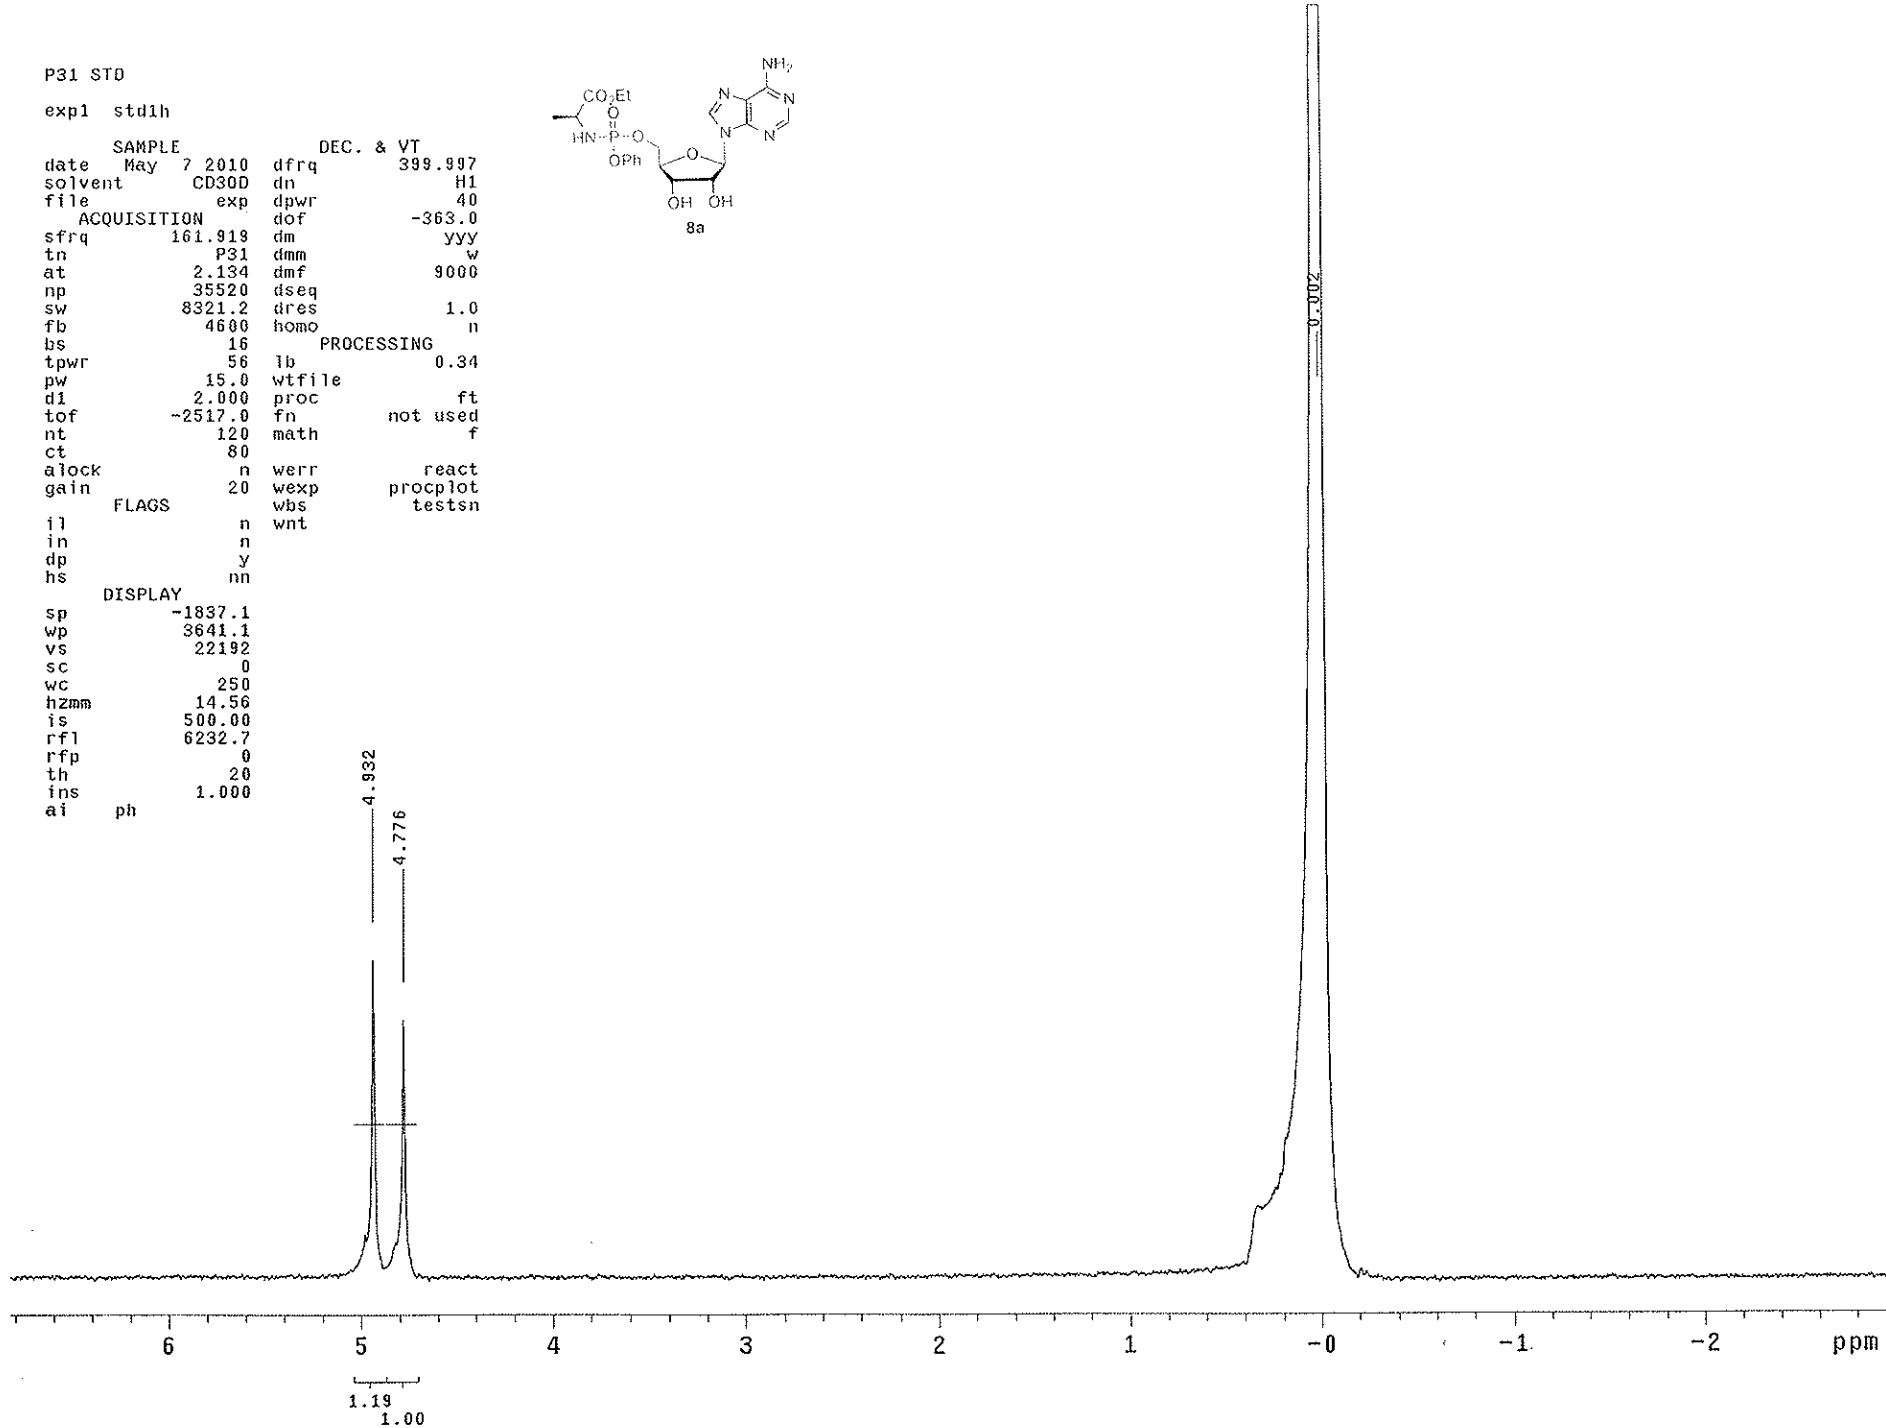

STANDARD 1H OBSERVE

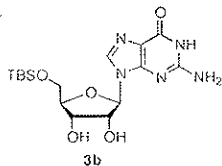

```

exp1 std1h
SAMPLE
date Dec 14 2011 dfrq 399.998
solvent DMSO dn H1
file exp dpwr 30
ACQUISITION dof 0
sfrq 399.999 dm nnn
tn H1 dmm c
at 1.999 dmf 200
np 25216 dseq
sw 6308.2 dres 1.0
fb 3600 homo n
bs 16
tpwr 58 lb 0.20
pw 10.0 wtfile
d1 1.500 proc ft
tof 950.2 fn not used
nt 120 math f
ct 80
alock n werr react
gain 20 wexp procplot
FLAGS
il n wnt
in n
dp y
hs nn
DISPLAY
sp -114.3
wp 5047.9
vs 407
sc 0
wc 250
hzmm 20.19
is 500.00
rfl 1205.2
rfp 1000.0
th 2
ins 1.000
nm ph
    
```

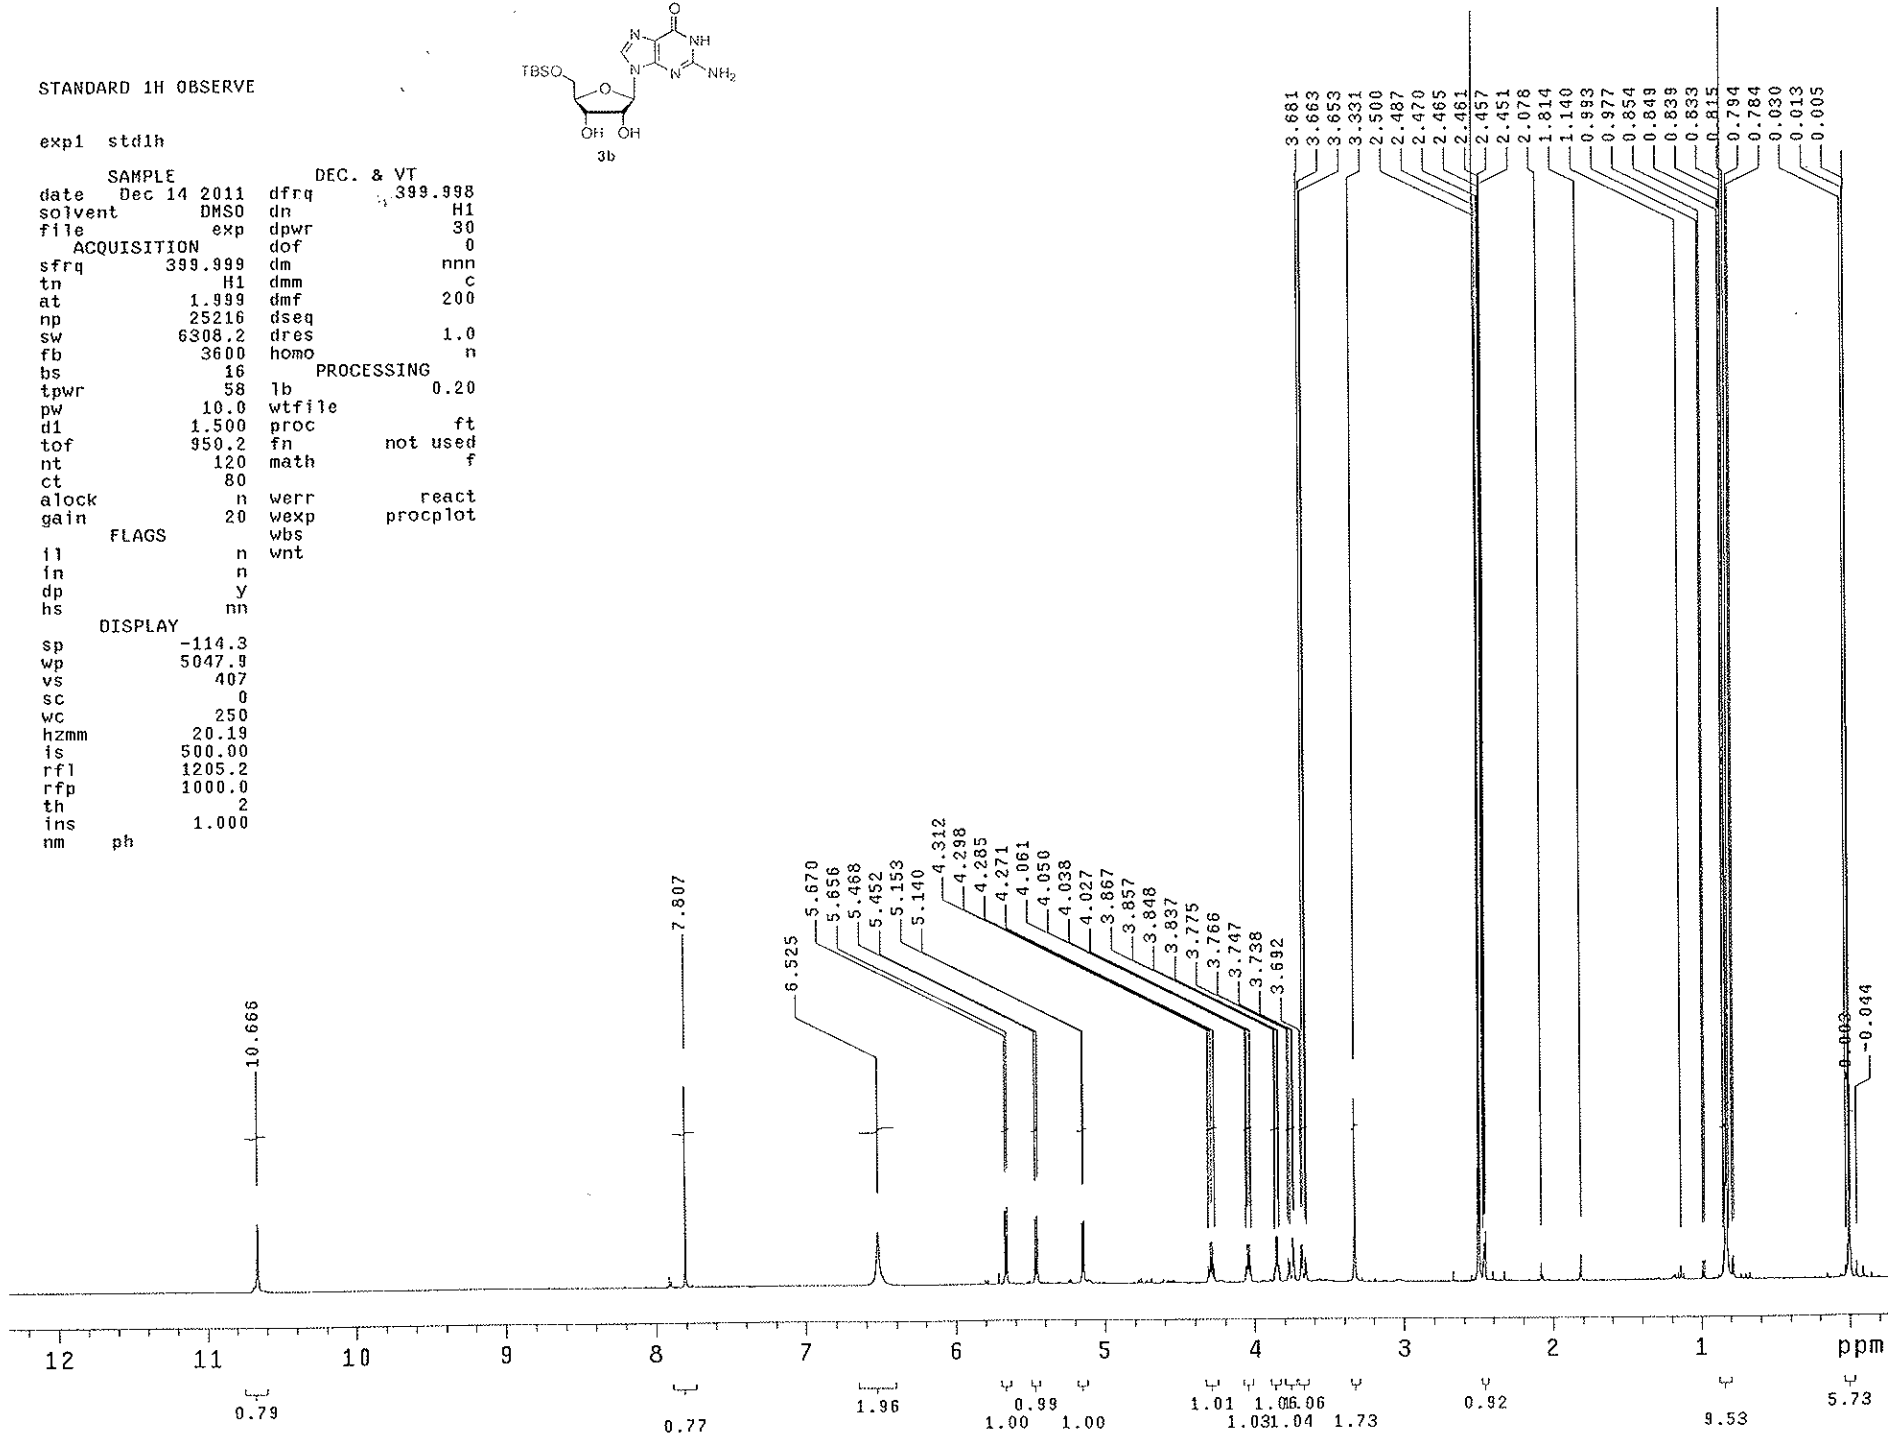

STANDARD 1H OBSERVE

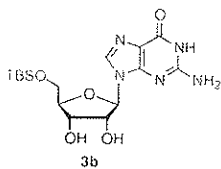

expl st#1h

|             |             |            |          |
|-------------|-------------|------------|----------|
| SAMPLE      |             | DEC. & VT  |          |
| date        | Dec 14 2011 | dfrq       | 399.998  |
| solvent     | DMSO        | dn         | H1       |
| file        | exp         | dpwr       | 30       |
| ACQUISITION |             | dof        | 0        |
| sfrq        | 399.999     | dm         | nnn      |
| tn          | H1          | dmm        | c        |
| at          | 1.999       | dmf        | 200      |
| np          | 25216       | dseq       |          |
| sw          | 6308.2      | dres       | 1.0      |
| fb          | 3600        | homo       | n        |
| bs          | 16          | PROCESSING |          |
| tpwr        | 58          | lb         | 0.20     |
| pw          | 10.0        | wtfile     |          |
| d1          | 1.500       | proc       | ft       |
| tof         | 950.2       | fn         | not used |
| nt          | 120         | math       | f        |
| ct          | 80          |            |          |
| alock       | n           | werr       | react    |
| gain        | 20          | wexp       | procplot |
| FLAGS       |             | wbs        |          |
|             |             | wnt        |          |
| il          | n           |            |          |
| in          | n           |            |          |
| dp          | y           |            |          |
| hs          | nn          |            |          |
| DISPLAY     |             |            |          |
| sp          | -197.1      |            |          |
| wp          | 878.7       |            |          |
| vs          | 407         |            |          |
| sc          | 0           |            |          |
| wc          | 250         |            |          |
| hzmm        | 3.51        |            |          |
| is          | 500.00      |            |          |
| rfl         | 1205.2      |            |          |
| rfp         | 1000.0      |            |          |
| th          | 2           |            |          |
| ins         | 1.000       |            |          |
| nm          | ph          |            |          |

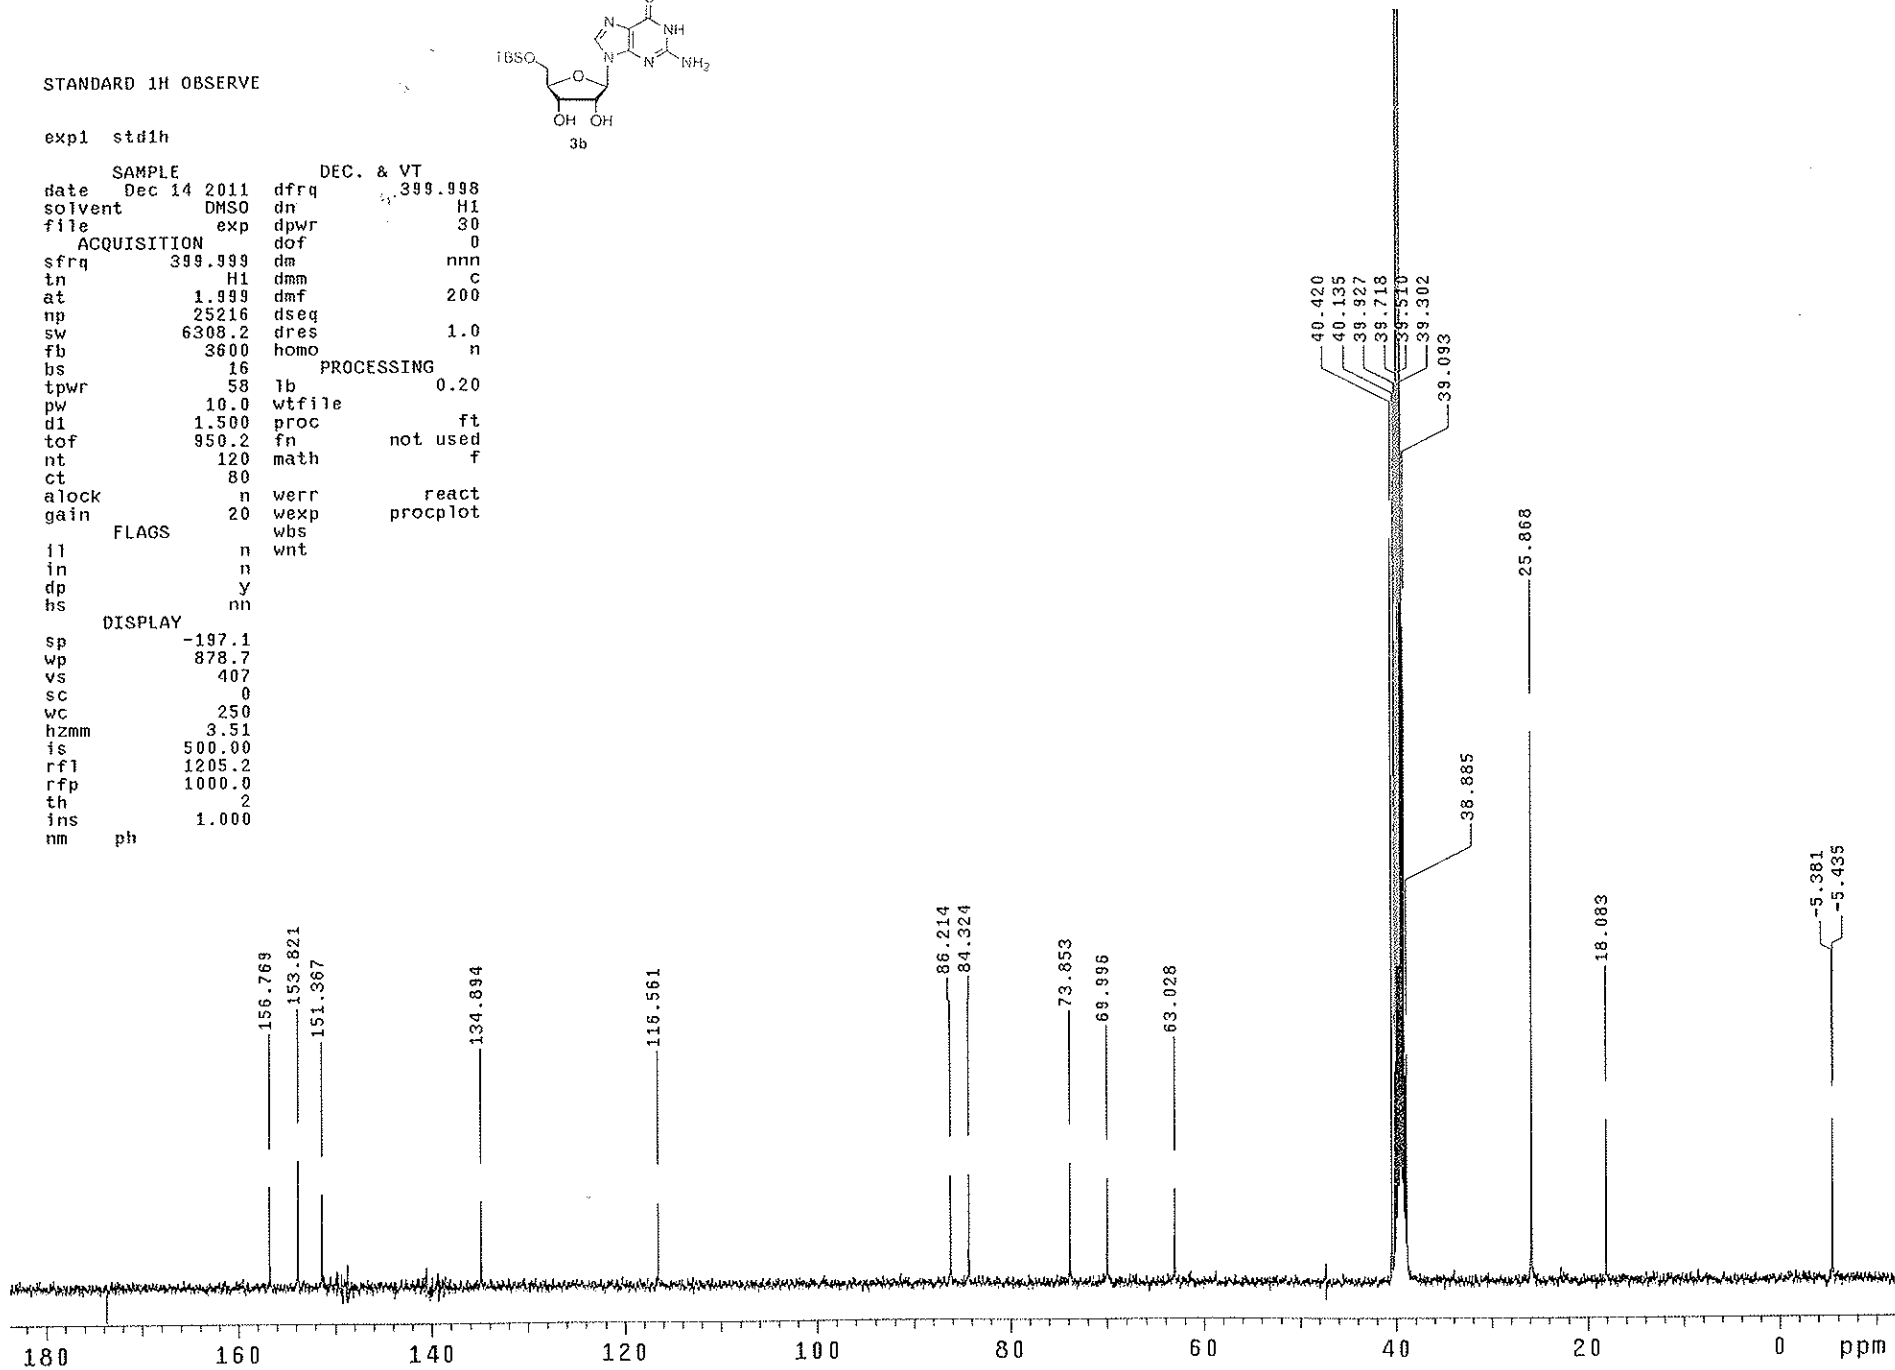



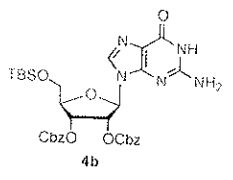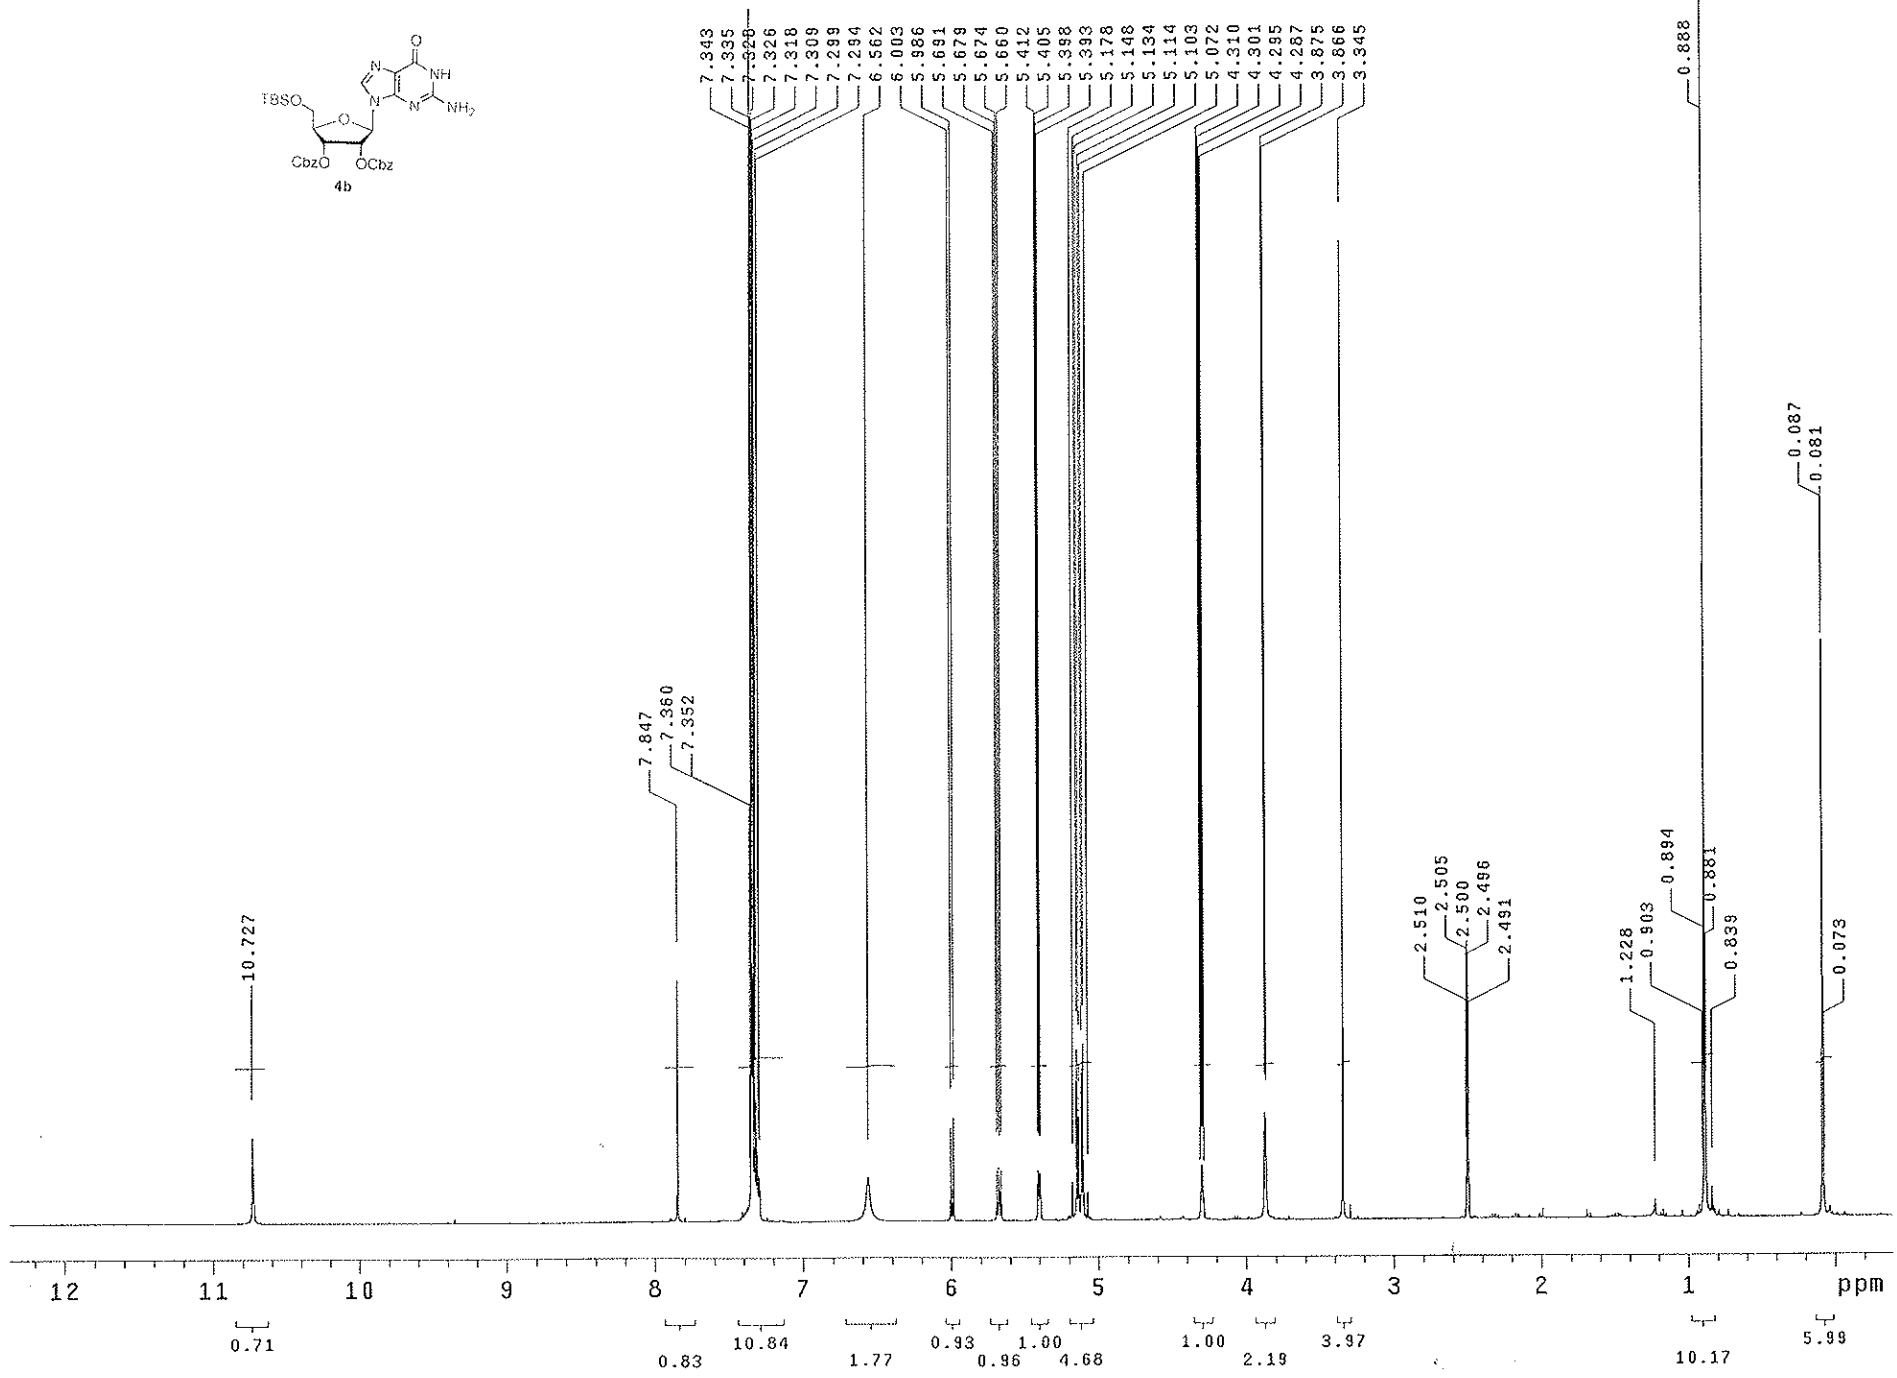

STANDARD 1H OBSERVE

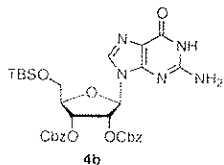

exp1 std1h

|             |             |            |          |
|-------------|-------------|------------|----------|
| SAMPLE      |             | DEC. & VT  |          |
| date        | Dec 16 2011 | dfrq       | 399.998  |
| solvent     | DMSO        | dn         | H1       |
| file        | exp         | dpwr       | 30       |
| ACQUISITION |             | dof        | 0        |
| sfrq        | 399.999     | dm         | nnn      |
| tn          | H1          | dmm        | c        |
| at          | 1.999       | dmf        | 200      |
| np          | 25216       | dseq       |          |
| sw          | 6308.2      | dres       | 1.0      |
| fb          | 3600        | homo       | n        |
| bs          | 16          | PROCESSING |          |
| tpwr        | 58          | lb         | 0.20     |
| pw          | 10.0        | wtfile     |          |
| d1          | 1.500       | proc       | ft       |
| tof         | 950.2       | fn         | not used |
| nt          | 120         | math       | f        |
| ct          | 120         |            |          |
| alock       | n           | werr       | react    |
| gain        | 20          | wexp       | procplot |
| FLAGS       |             | wbs        |          |
| il          | n           | wnt        |          |
| in          | n           |            |          |
| dp          | y           |            |          |
| hs          | nn          |            |          |
| DISPLAY     |             |            |          |
| sp          | -181.7      |            |          |
| wp          | 861.7       |            |          |
| vs          | 241         |            |          |
| sc          | 0           |            |          |
| wc          | 250         |            |          |
| hzmm        | 3.45        |            |          |
| is          | 500.00      |            |          |
| rfl         | 1189.8      |            |          |
| rfp         | 1000.0      |            |          |
| th          | 2           |            |          |
| ins         | 1.000       |            |          |
| nm          | ph          |            |          |

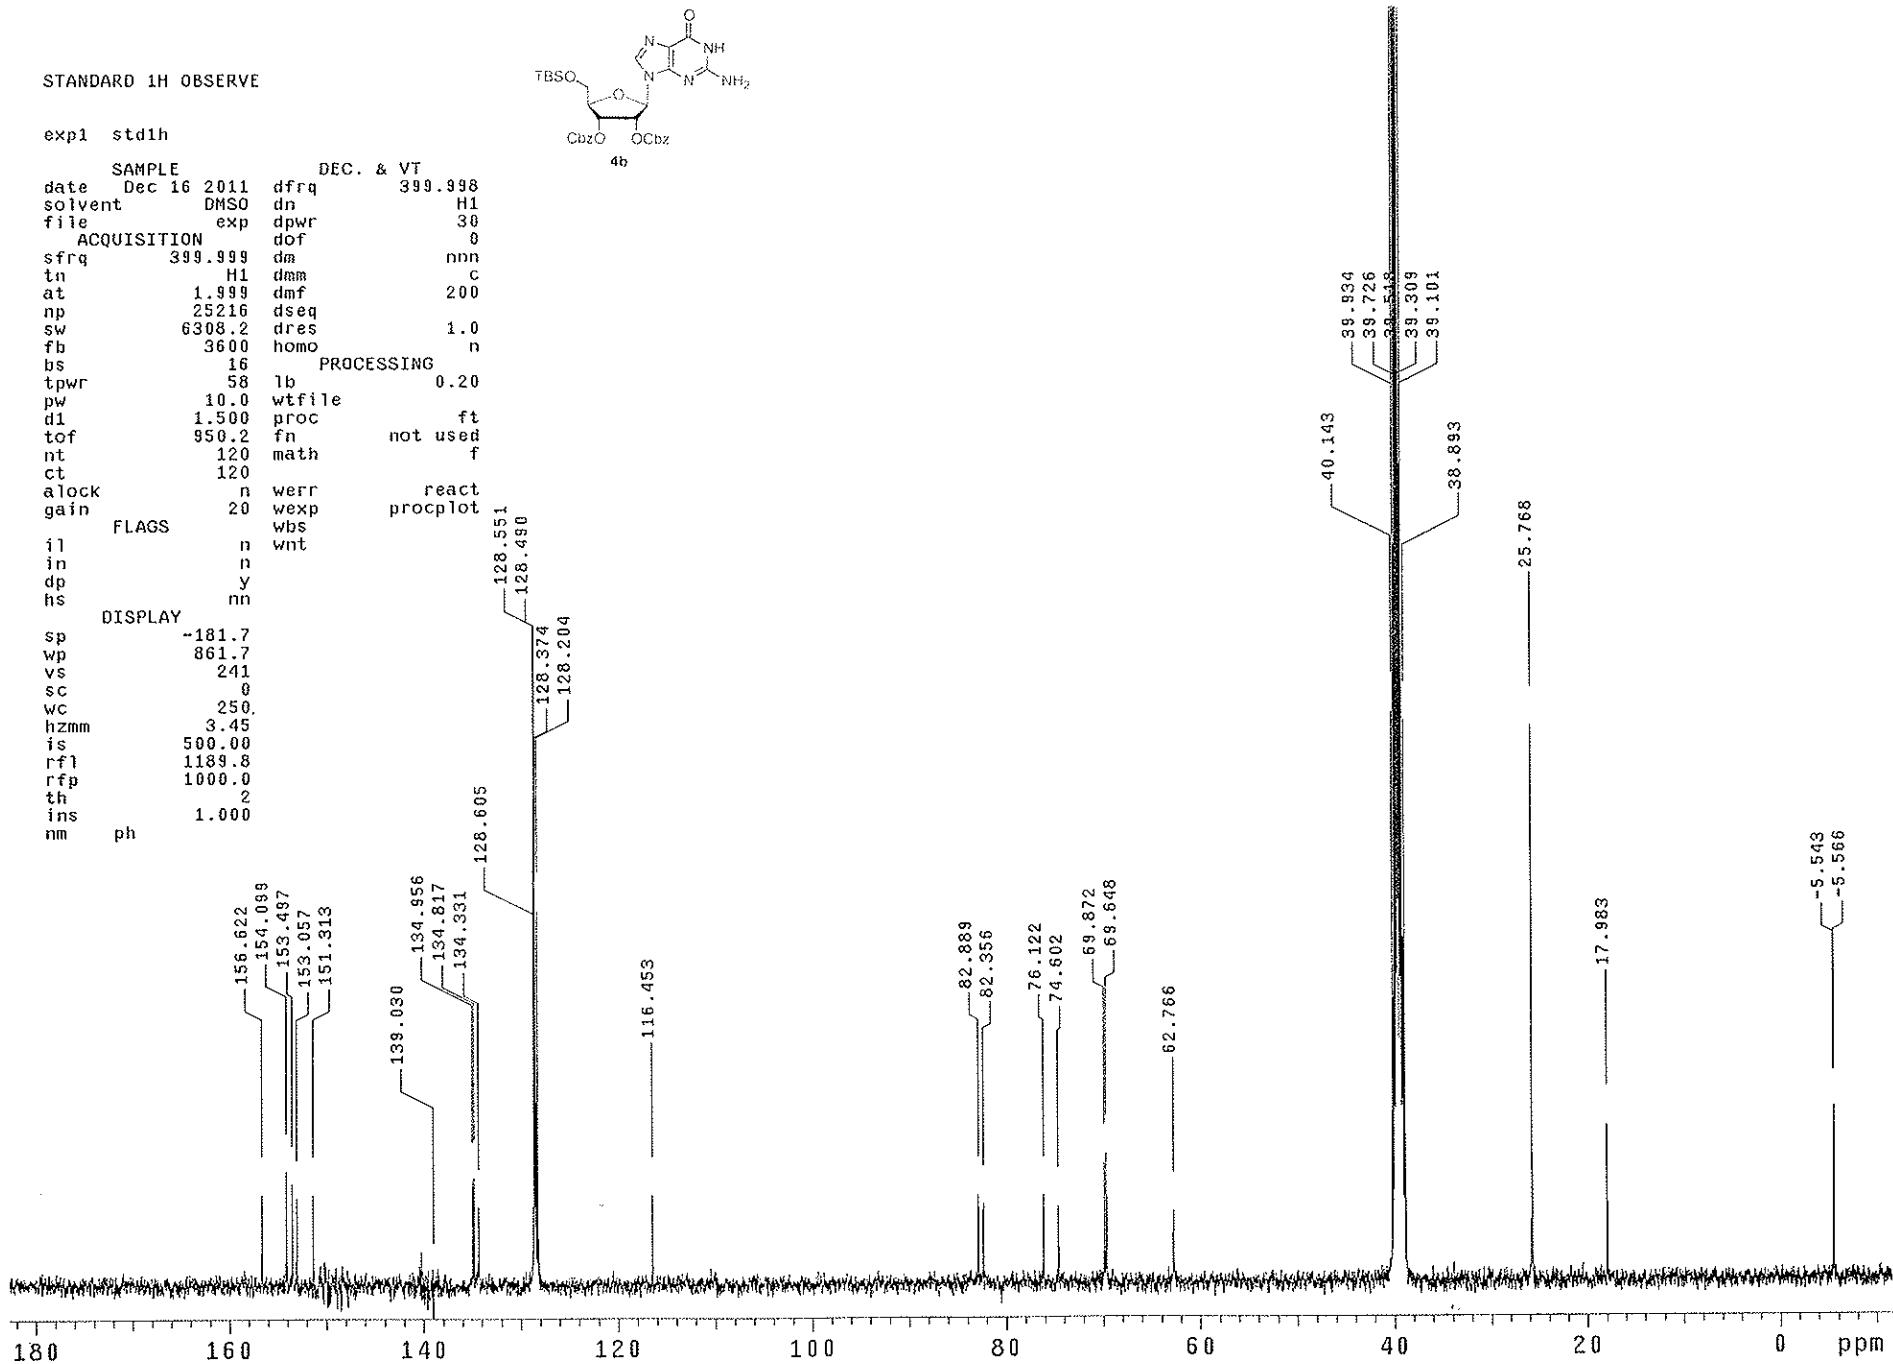

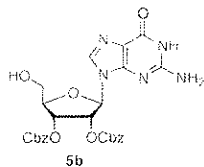

STANDARD 1H OBSERVE

expl std1h

|             |            |            |          |
|-------------|------------|------------|----------|
| SAMPLE      |            | DEC. & VT  |          |
| date        | Dec 7 2011 | dfrq       | 399.998  |
| solvent     | DMSO       | dn         | H1       |
| file        | exp        | dpwr       | 30       |
| ACQUISITION |            | dof        | 0        |
| sfrq        | 399.999    | dm         | nnn      |
| tn          | H1         | dmm        | c        |
| at          | 1.999      | dmf        | 200      |
| np          | 25216      | dseq       |          |
| sw          | 6308.2     | dres       | 1.0      |
| fb          | 3600       | homo       | n        |
| bs          | 16         | PROCESSING |          |
| tpwr        | 58         | lb         | 0.20     |
| pw          | 10.0       | wffile     |          |
| d1          | 1.500      | proc       | ft       |
| iof         | 950.2      | fn         | not used |
| nt          | 120        | math       | f        |
| ct          | 48         |            |          |
| alock       | n          | werr       | react    |
| gain        | 20         | wexp       | procplot |
| FLAGS       |            | wbs        |          |
| il          | n          | wnt        |          |
| in          | n          |            |          |
| dp          | y          |            |          |
| hs          | nn         |            |          |
| DISPLAY     |            |            |          |
| sp          | -82.4      |            |          |
| wp          | 5072.9     |            |          |
| vs          | 241        |            |          |
| sc          | 0          |            |          |
| wc          | 250        |            |          |
| hzmm        | 20.29      |            |          |
| is          | 500.00     |            |          |
| rfl         | 1189.8     |            |          |
| rfp         | 1000.0     |            |          |
| th          | 2          |            |          |
| ins         | 1.000      |            |          |
| nm          | ph         |            |          |

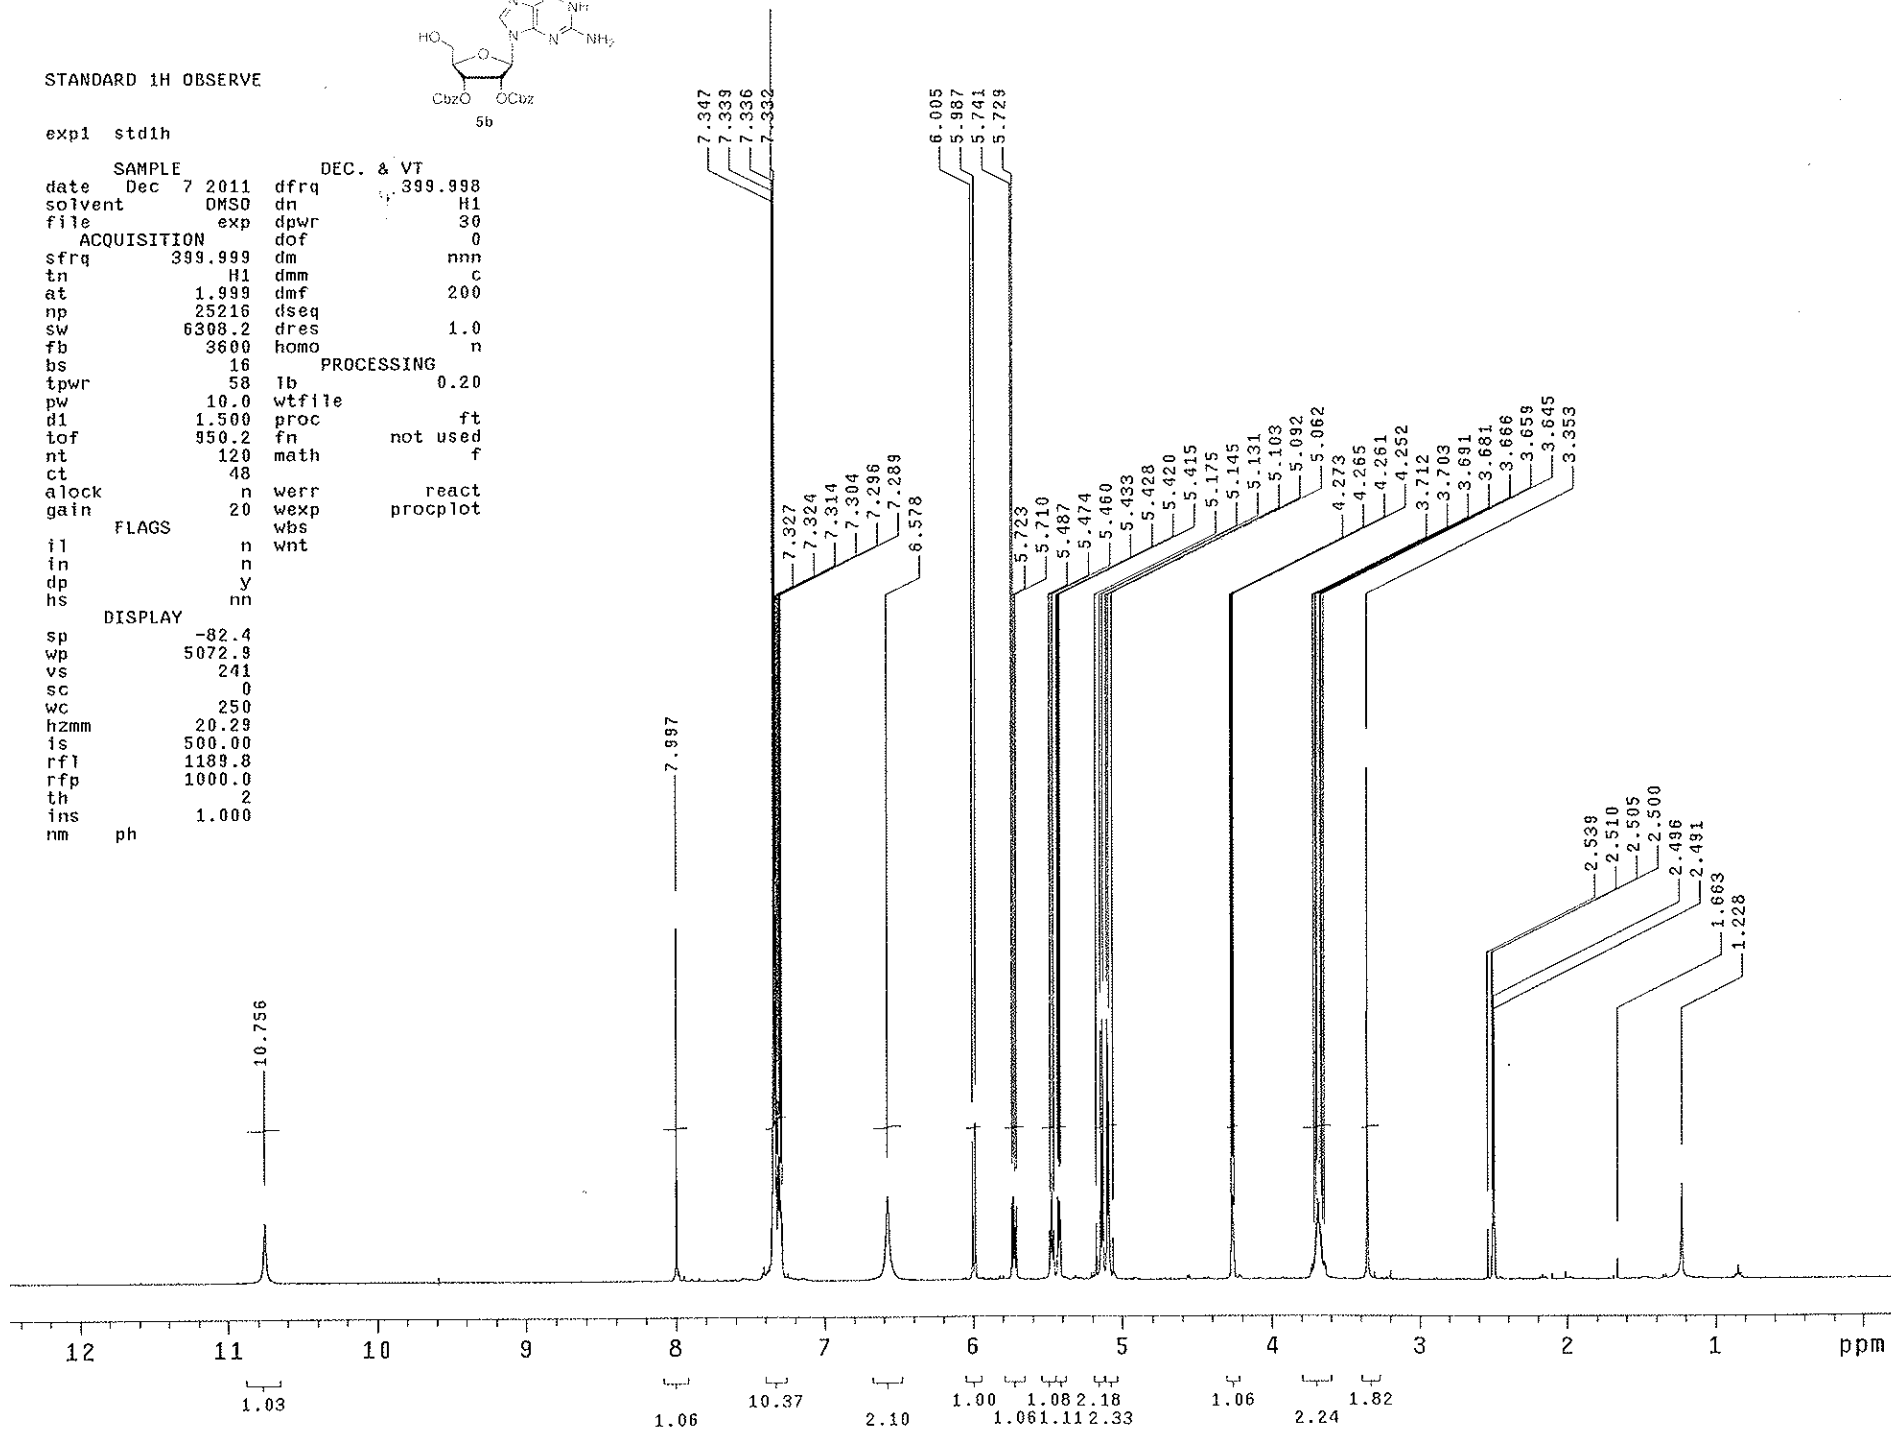

C13 STD

exp1 std1h

SAMPLE DEC. & VT  
date Dec 7 2011 dfrq 399.998  
solvent DMSO dn H1  
file exp dpwr 40  
ACQUISITION dof -363.0  
sfrq 100.590 dm YYY  
tn C13 dmm W  
at 1.599 dmf 9000  
np 81344 dseq  
sw 25429.1 dres 1.0  
fb 14000 homo n  
bs 16 PROCESSING  
tpwr 58 lb 2.00  
pw 6.0 wtfile  
dl 4.000 proc ft  
tof 1659.9 fn 65536  
nt 1200 math f  
ct 832  
alock n werr react  
gain 20 wexp procplot  
FLAGS wbs testsn  
wnt  
il n  
in n  
dp y  
hs nn  
DISPLAY  
sp 6046.0  
wp 2375.5  
vs 183784  
sc 0  
wc 250  
h2mm 9.50  
is 500.00  
rfl 5576.0  
rfp 3973.9  
th 4  
ins 100.000  
al ph

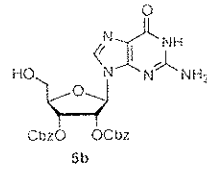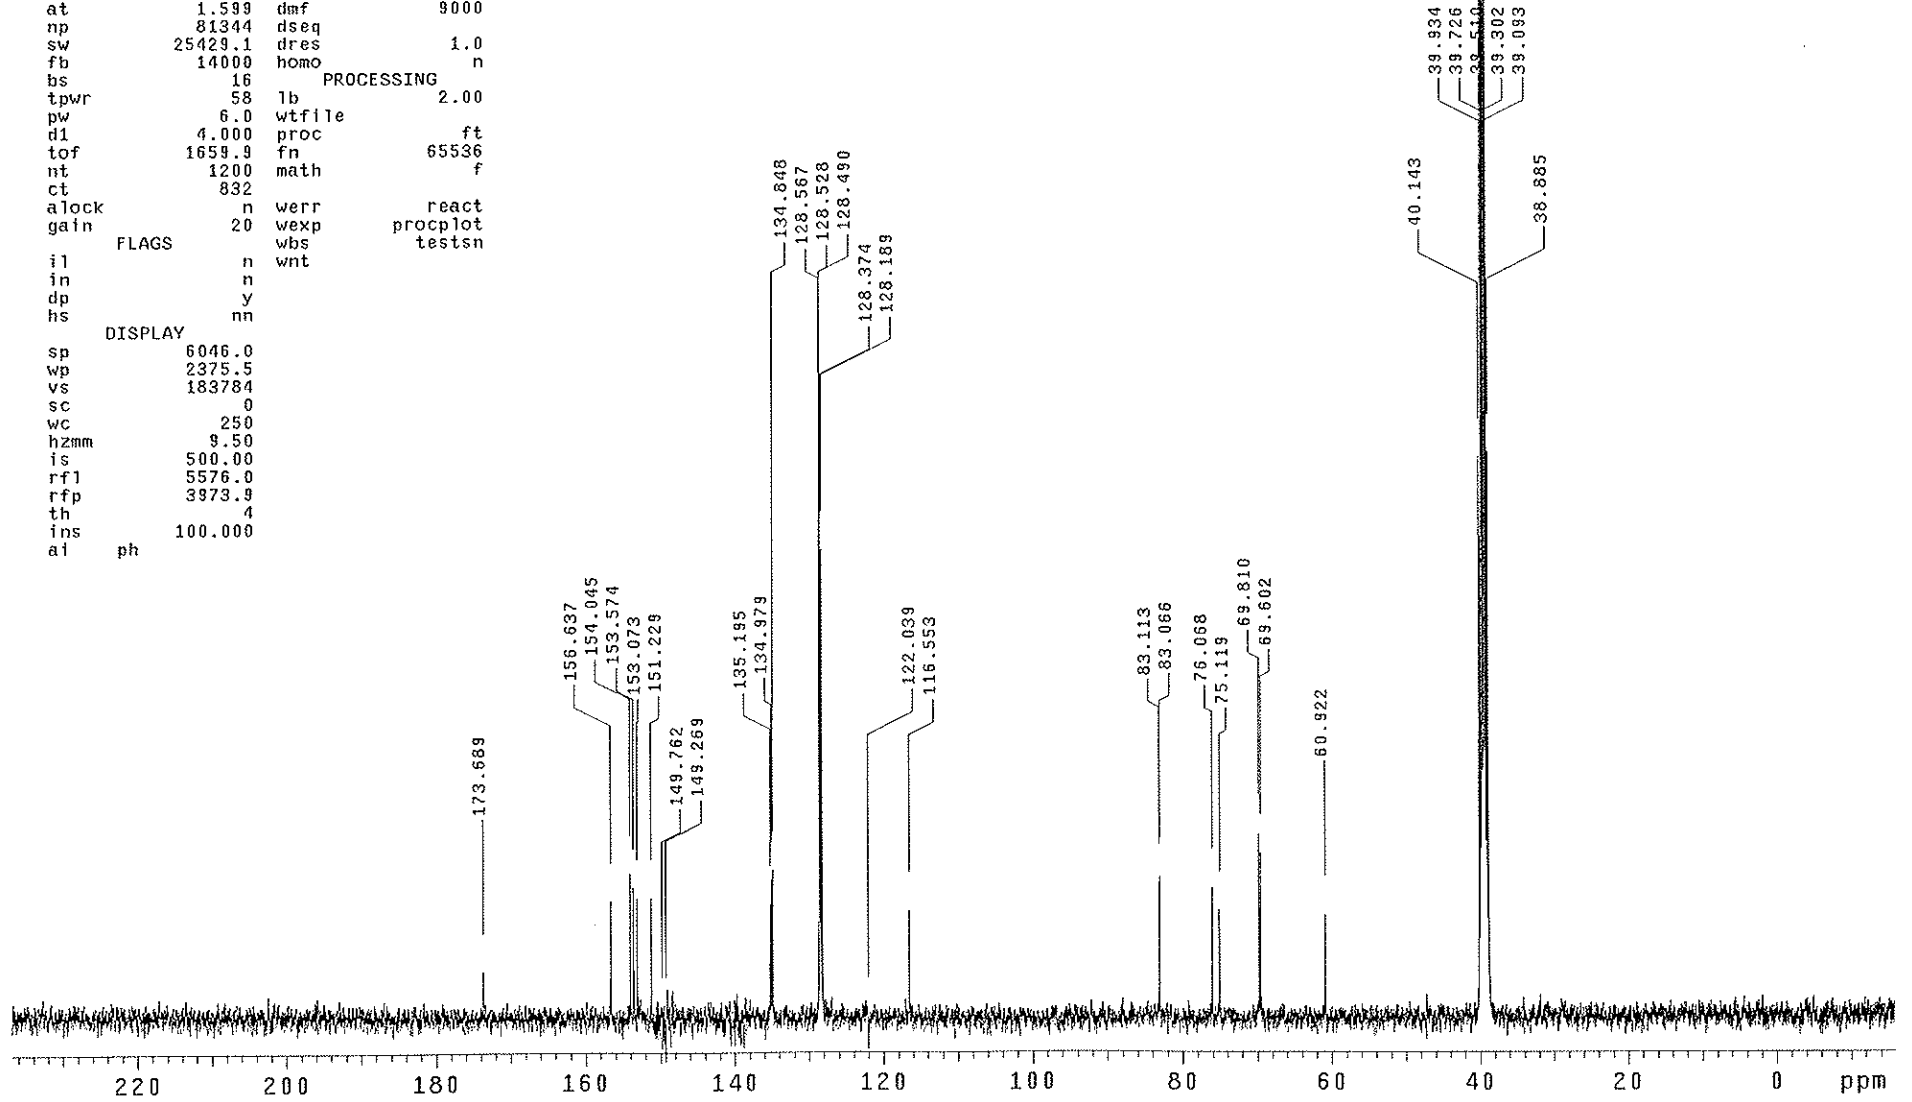

P31 STD

exp1 stdlh 7.346  
 date Dec 10 2011 dfrq 300.138  
 solvent CD300 dd H1  
 file exp dpwr 40  
 ACQUISITION def -363.0  
 sfrq 161.919 dm  
 tn P31 dmm  
 at 2.134 dmf 9000  
 np 35520 dseq  
 sw 8321.2 dres 1.0  
 fb 4600 homo n  
 bs 16  
 tpwr 56 lb 0.34  
 pw 15.0 wtfile  
 d1 2.000 proc  
 tof -2517.0 fn not used  
 nt 120 math f  
 ct 120  
 alock n werr react  
 gain 20 wexp proplot  
 wbs testsn  
 wnt  
 FLAGS  
 il n  
 in n  
 dp Y  
 hs nn  
 sp 7.905  
 vs 7.958  
 sc 7.958  
 wc 7.958  
 hzmm 6.38  
 is 500.00  
 rfl 6232.2  
 rfp 0  
 th 4  
 ins 1.000  
 al ph

PROCESSING  
 lb 0.34  
 ft  
 not used  
 f  
 react  
 proplot  
 testsn

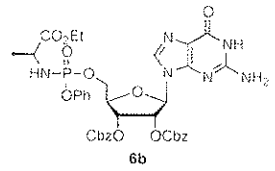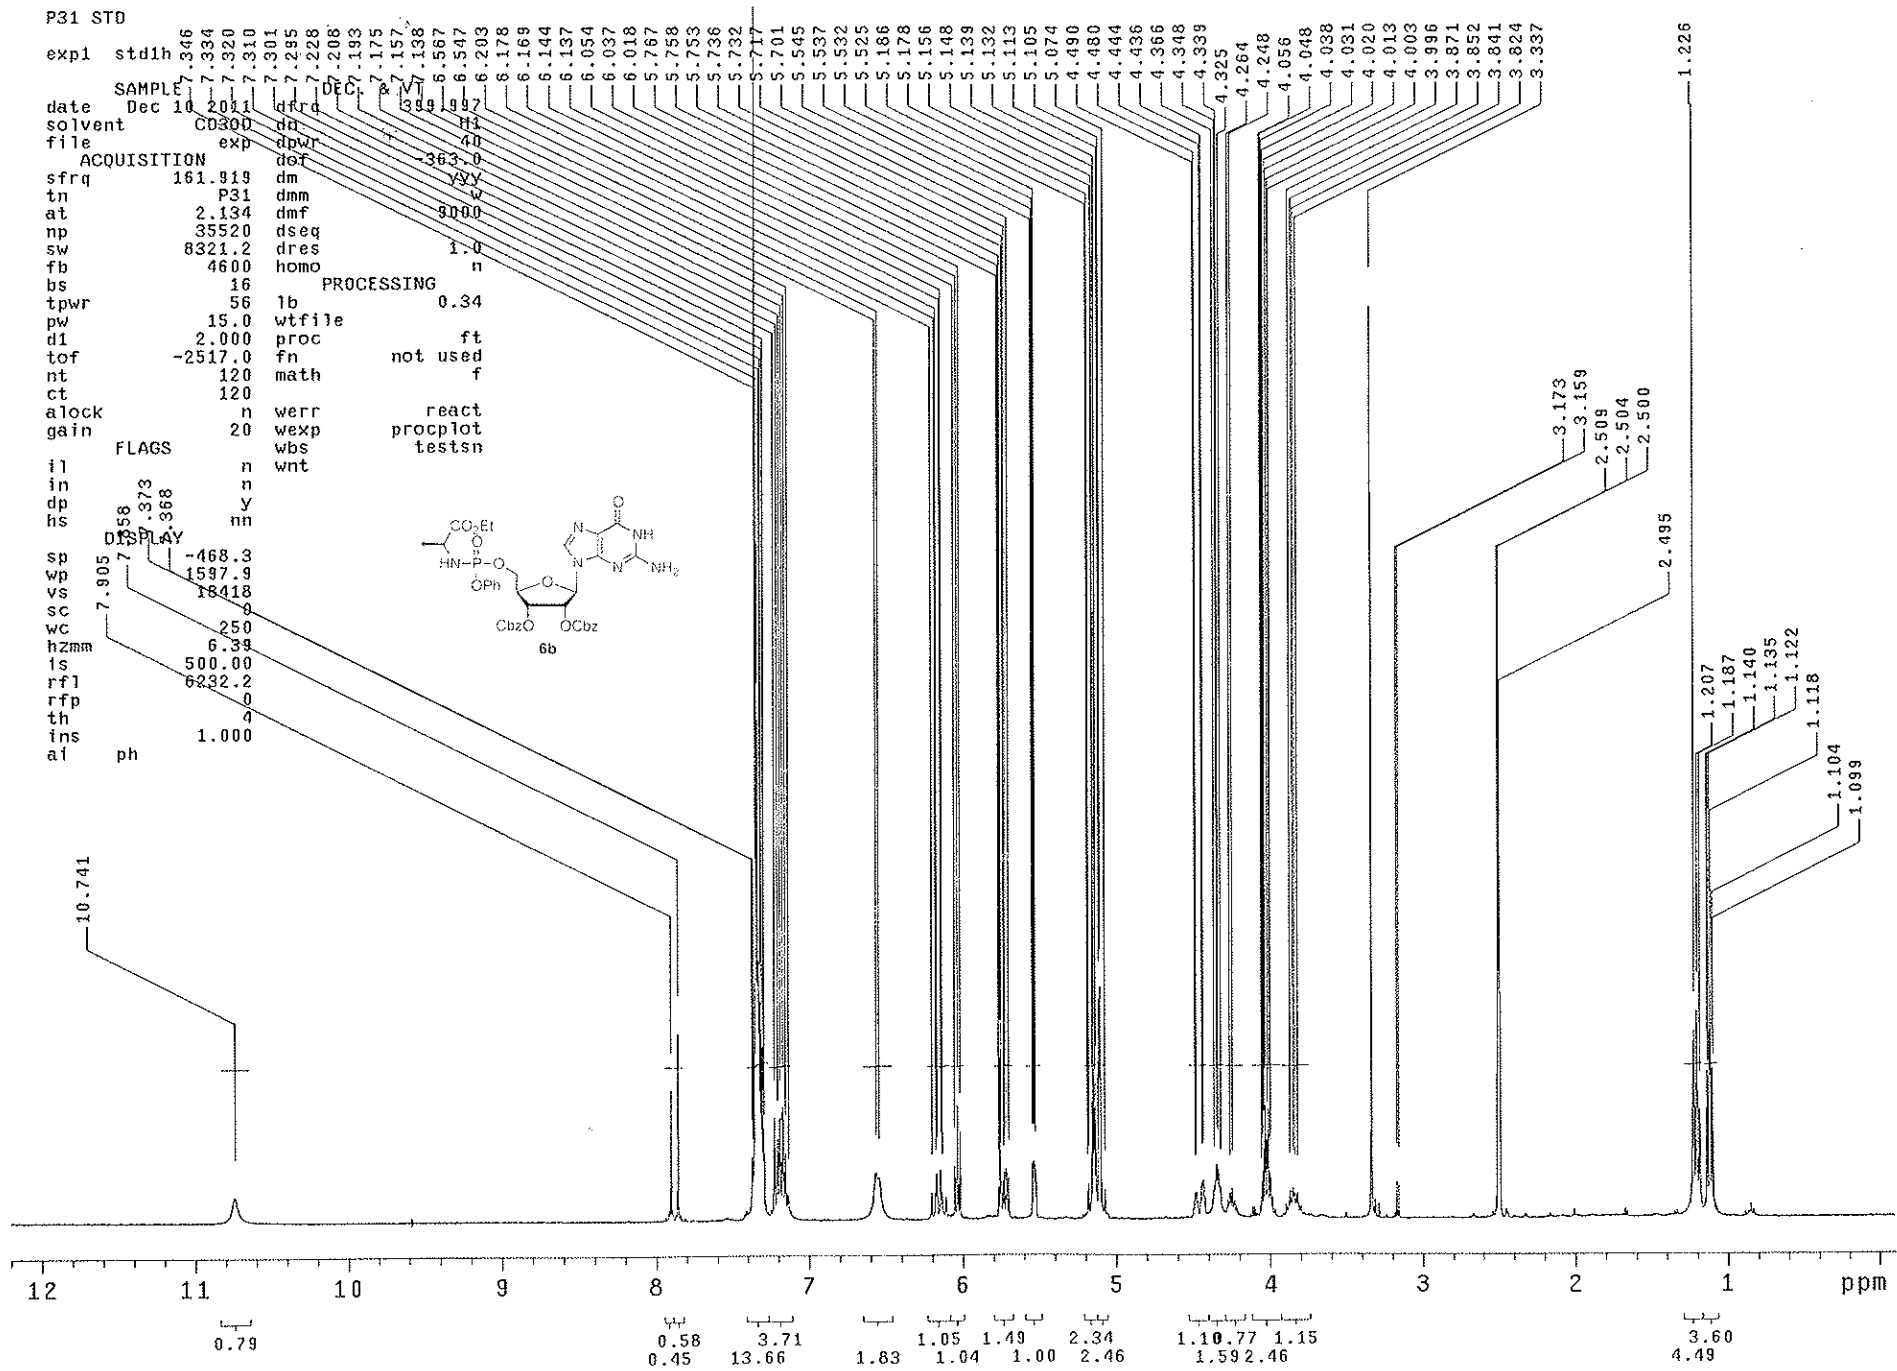

C13 STD

exp1 std1h

SAMPLE DEC. & VT  
date Dec 10 2011 dfrq 399.997  
solvent CD3OD dn H1  
file exp dpwr 40  
ACQUISITION dof -363.0  
sfrq 100.590 dm yyy  
tn C13 dmm w  
at 1.599 dmf 9000  
np 81344 dseq  
sw 25429.1 dres 1.0  
fb 14000 homo n  
bs 16  
tpwr 58 lb PROCESSING 2.00  
pw 6.0 wtfile  
dl 4.000 proc ft  
tof 1659.9 fn 65536  
nt 2400 math f  
ct 2224  
alock n werr react  
gain 20 wexp proplot  
FLAGS wbs testsn  
wnt  
il n  
in n  
dp y  
hs nn  
DISPLAY  
sp -635.3  
wp 19213.7  
vs 240044  
sc 0  
wc 250  
hzmm 76.85  
is 500.00  
rf1 1537.1  
rfp 0  
th 4  
ins 100.000  
ai ph

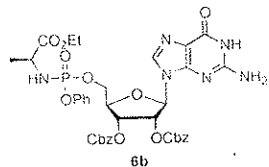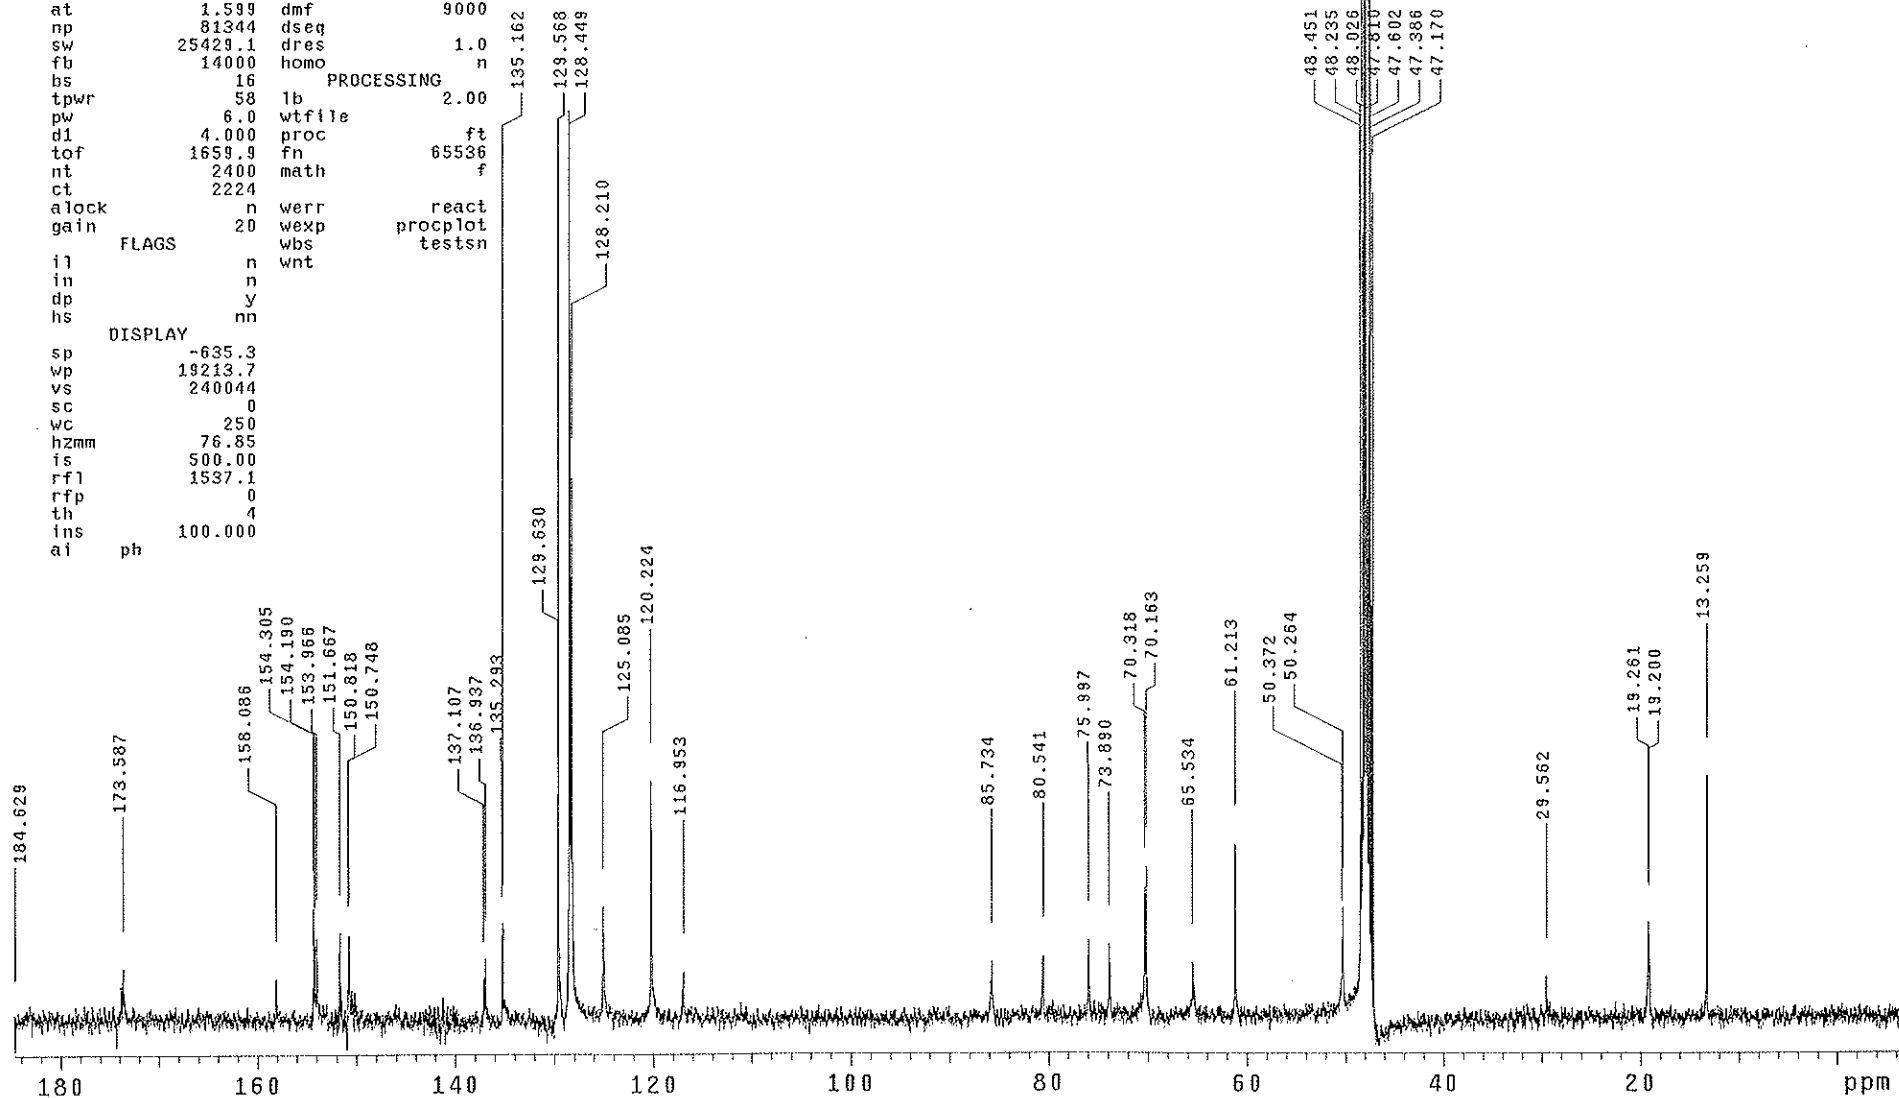

P31 STD

exp1 stdih

SAMPLE DEC. & VT  
date Dec 10 2011 dfrq 399.997  
solvent CD300 dn H1  
file exp dpwr 40  
ACQUISITION dof -363.0  
sfrq 161.919 dm yyy  
tn P31 dmm W  
at 2.134 dmf 900  
np 35520 dseq 1.00  
sw 8321.2 dres 1.0  
fb 4600 homo  
bs 16 PROCESSING  
tpwr 56 lb 0.34  
pw 15.0 wtfile  
di 2.000 proc ft  
tof -2517.0 fn not used  
nt 120 math f  
ct 120  
alock n werr react  
gain 20 wexp procplot  
FLAGS wbs testsr  
il n wnt  
in n  
dp y  
hs nn  
DISPLAY  
sp -6232.2  
wp 8321.2  
vs 18418  
sc 0  
wc 250  
hzmm 33.28  
is 500.00  
rfl 6232.2  
rfp 0  
th 4  
ins 1.000  
ai ph

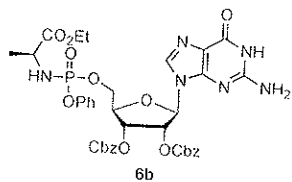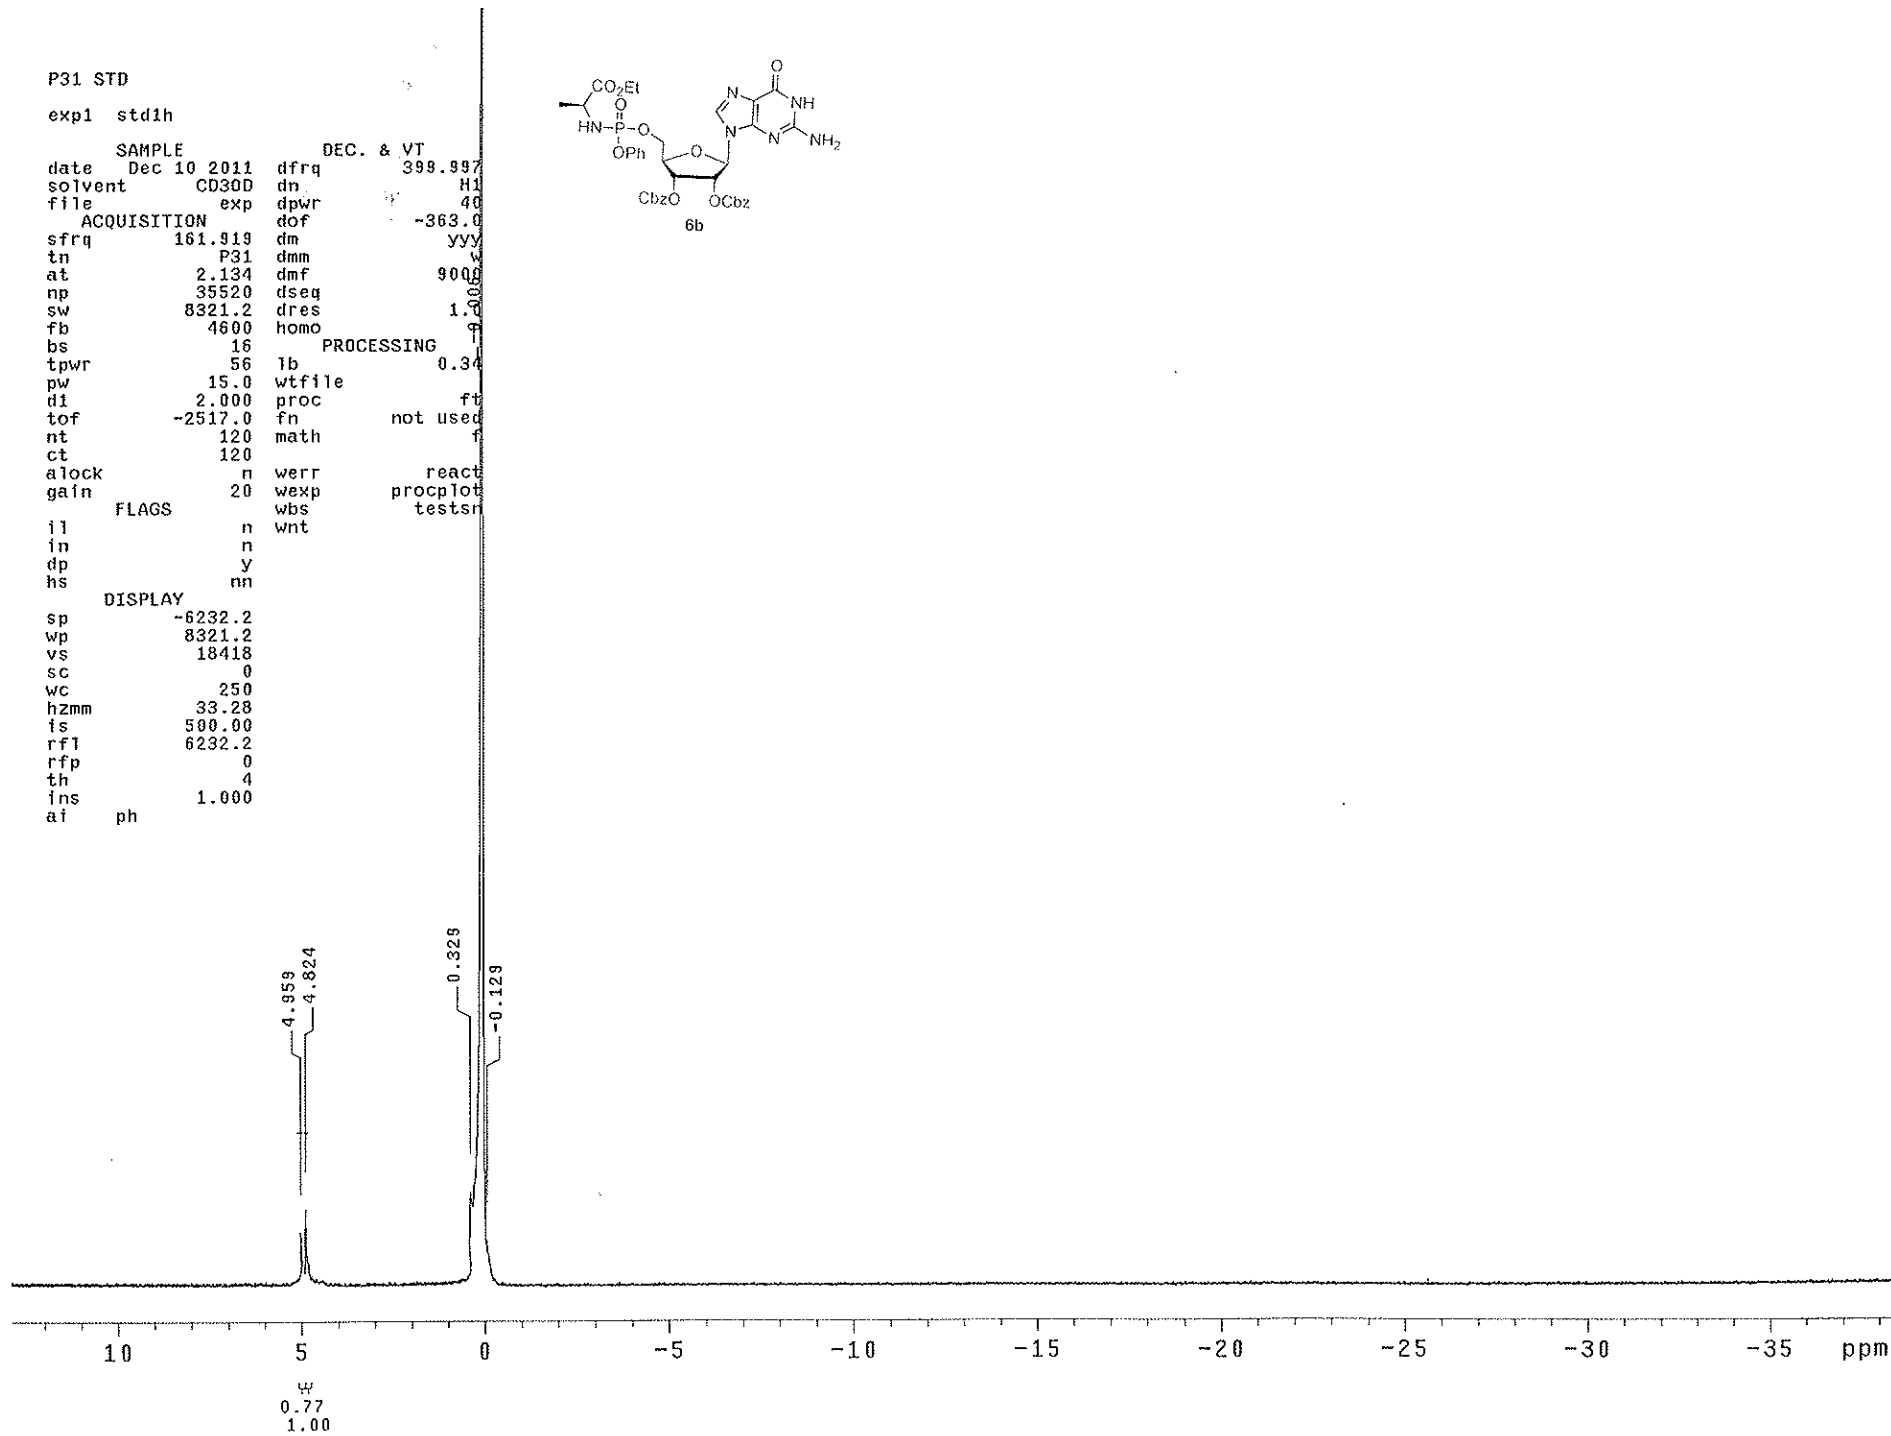





STANDARD 1H OBSERVE

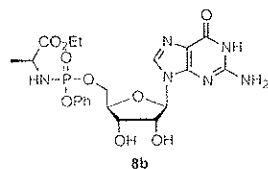

exp1 std1h

SAMPLE DEC. & VT  
 date Apr 17 2010 dfrq 399.998  
 solvent DMSO dn H1  
 file exp dpwr 30  
 ACQUISITION dof 0  
 sfrq 399.999 dm nnn  
 tn H1 dmm c  
 at 1.999 dmf 200  
 np 25216 dseq  
 sw 6308.2 dres 1.0  
 fb 3600 homo n  
 bs 16  
 tpwr 58 PROCESSING  
 pw 10.0 lb 0.20  
 dl 1.500 wtfile  
 tof 950.2 fn not used ft  
 nt 200 math f  
 ct 96  
 alock n werr react  
 gain 20 wexp procplot  
 wbs  
 wnt

FLAGS  
 il n  
 in n  
 dp y  
 hs nn  
 DISPLAY  
 sp 397.8  
 vp 679.6  
 vs 576  
 sc 0  
 wc 250  
 hzmm 2.72  
 is 500.00  
 rfl 1190.6  
 rfp 1000.0  
 th 4  
 ins 1.000  
 nm ph

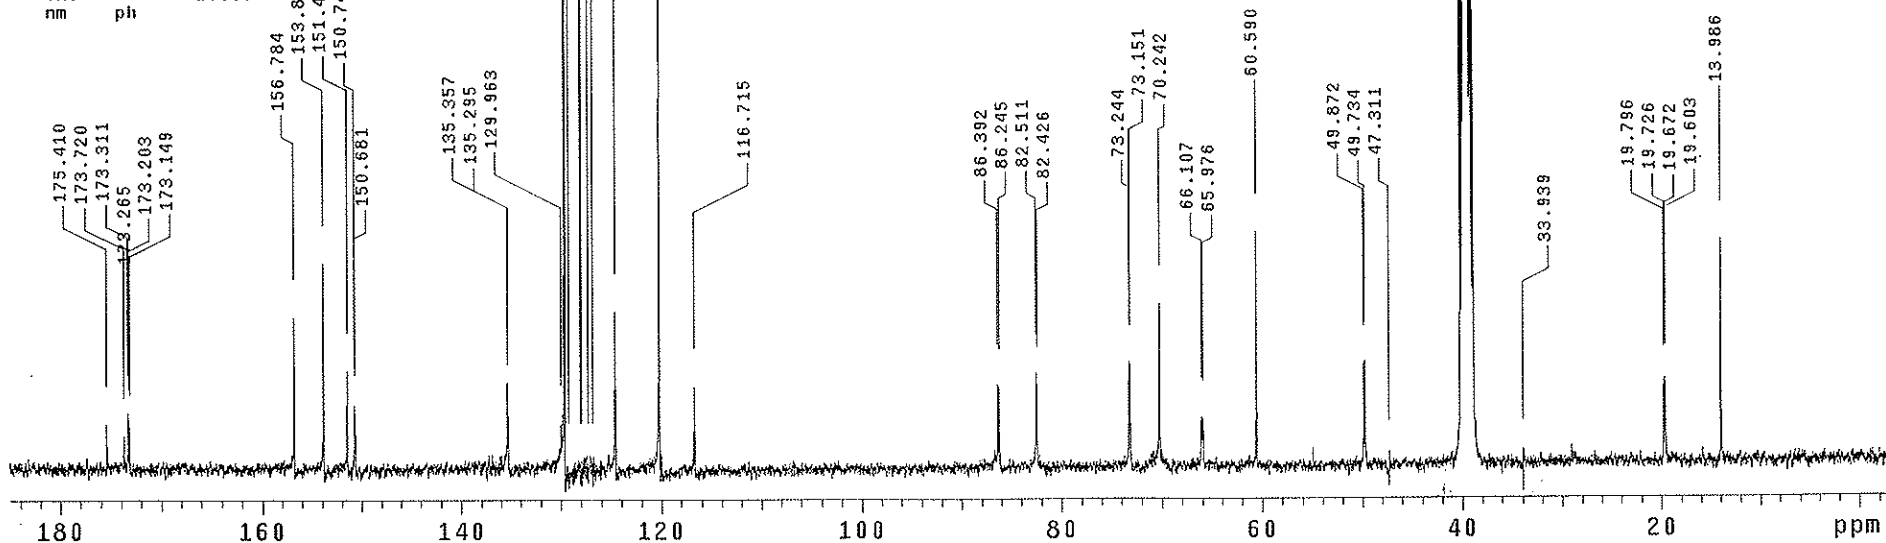

P31 STD

expi std1h

| SAMPLE      |             | DEC. & VT |          |
|-------------|-------------|-----------|----------|
| date        | Apr 18 2010 | dfrq      | 399.998  |
| solvent     | DMSO        | dn        | H1       |
| file        | exp         | dpwr      | 40       |
| ACQUISITION |             | -         |          |
| sfrq        | 161.919     | dof       | -363.0   |
| tn          | P31         | dm        | yyy      |
| at          | 2.134       | dmm       | w        |
| np          | 35520       | dmf       | 9000     |
| sw          | 8321.2      | dseq      |          |
| fb          | 4600        | dres      | 1.0      |
| bs          | 16          | homo      | n        |
| PROCESSING  |             | -         |          |
| tpwr        | 56          | lb        | 0.34     |
| pw          | 15.0        | wfile     |          |
| d1          | 2.000       | proc      | ft       |
| tof         | -2517.0     | fn        | not used |
| nt          | 200         | math      | f        |
| ct          | 200         |           |          |
| alock       | n           | werr      | react    |
| gain        | 20          | wexp      | procplot |
| FLAGS       |             | -         |          |
| il          | n           | wbs       | testsn   |
| in          | n           | wnt       |          |
| dp          | y           |           |          |
| hs          | nn          |           |          |
| DISPLAY     |             | -         |          |
| sp          | -1770.8     |           |          |
| wp          | 3498.9      |           |          |
| vs          | 48893       |           |          |
| sc          | 0           |           |          |
| wc          | 250         |           |          |
| hzmm        | 14.00       |           |          |
| is          | 500.00      |           |          |
| rfl         | 6253.8      |           |          |
| rfp         | 0           |           |          |
| th          | 2           |           |          |
| ins         | 100.000     |           |          |
| a1          | ph          |           |          |

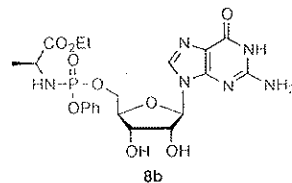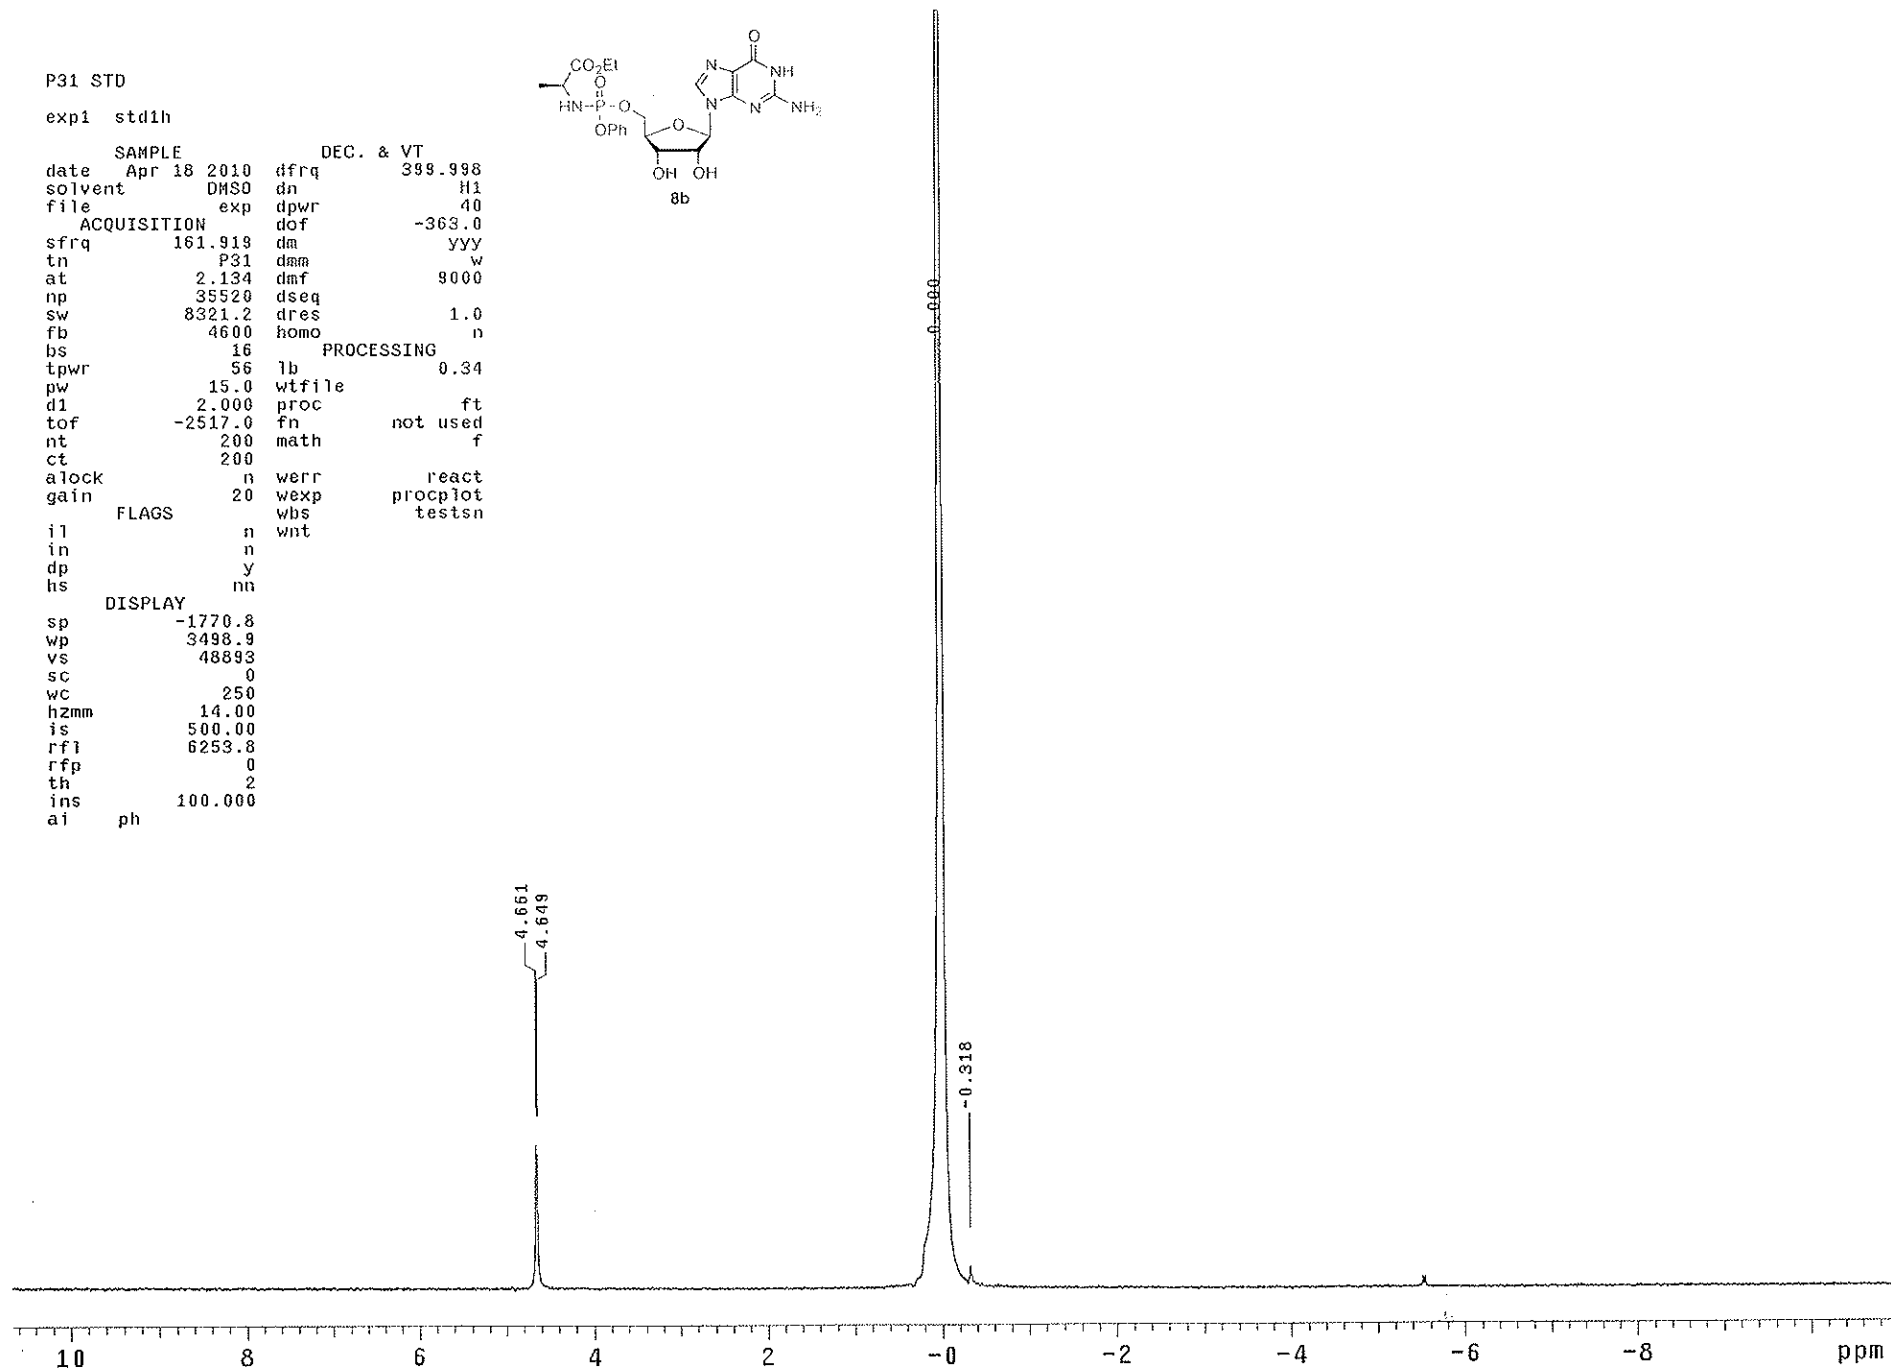

STANDARD 1H OBSERVE

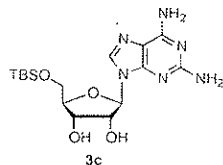

exp1 std1h

|             |             |            |          |
|-------------|-------------|------------|----------|
| SAMPLE      |             | DEC. & VT  |          |
| date        | Dec 18 2009 | dfrq       | 399.998  |
| solvent     | CD3OD       | dn         | H1       |
| file        | exp         | dpwr       | 30       |
| ACQUISITION |             | dof        | 0        |
| sfrq        | 399.999     | dm         | nnn      |
| tn          | H1          | dmm        | c        |
| at          | 1.999       | dmf        | 200      |
| np          | 25216       | dseq       |          |
| sw          | 6308.2      | dres       | 1.0      |
| fb          | 3600        | homo       | n        |
| bs          | 16          | PROCESSING |          |
| tpwr        | 58          | lb         | 0.20     |
| pw          | 10.0        | wtfile     |          |
| di          | 1.500       | proc       | ft       |
| tof         | 950.2       | fn         | not used |
| nt          | 200         | math       | f        |
| ct          | 96          |            |          |
| alock       | n           | werr       | react    |
| gain        | 20          | wexp       | procplot |

|       |    |
|-------|----|
| FLAGS |    |
| il    | n  |
| in    | n  |
| dp    | y  |
| hs    | nn |

|         |        |
|---------|--------|
| DISPLAY |        |
| sp      | -151.7 |
| wp      | 4285.5 |
| vs      | 543    |
| sc      | 0      |
| wc      | 250    |
| h2mm    | 17.14  |
| is      | 500.00 |
| rfl     | 2199.0 |
| rfl     | 1948.0 |
| th      | 4      |
| ins     | 1.000  |
| nm      | ph     |

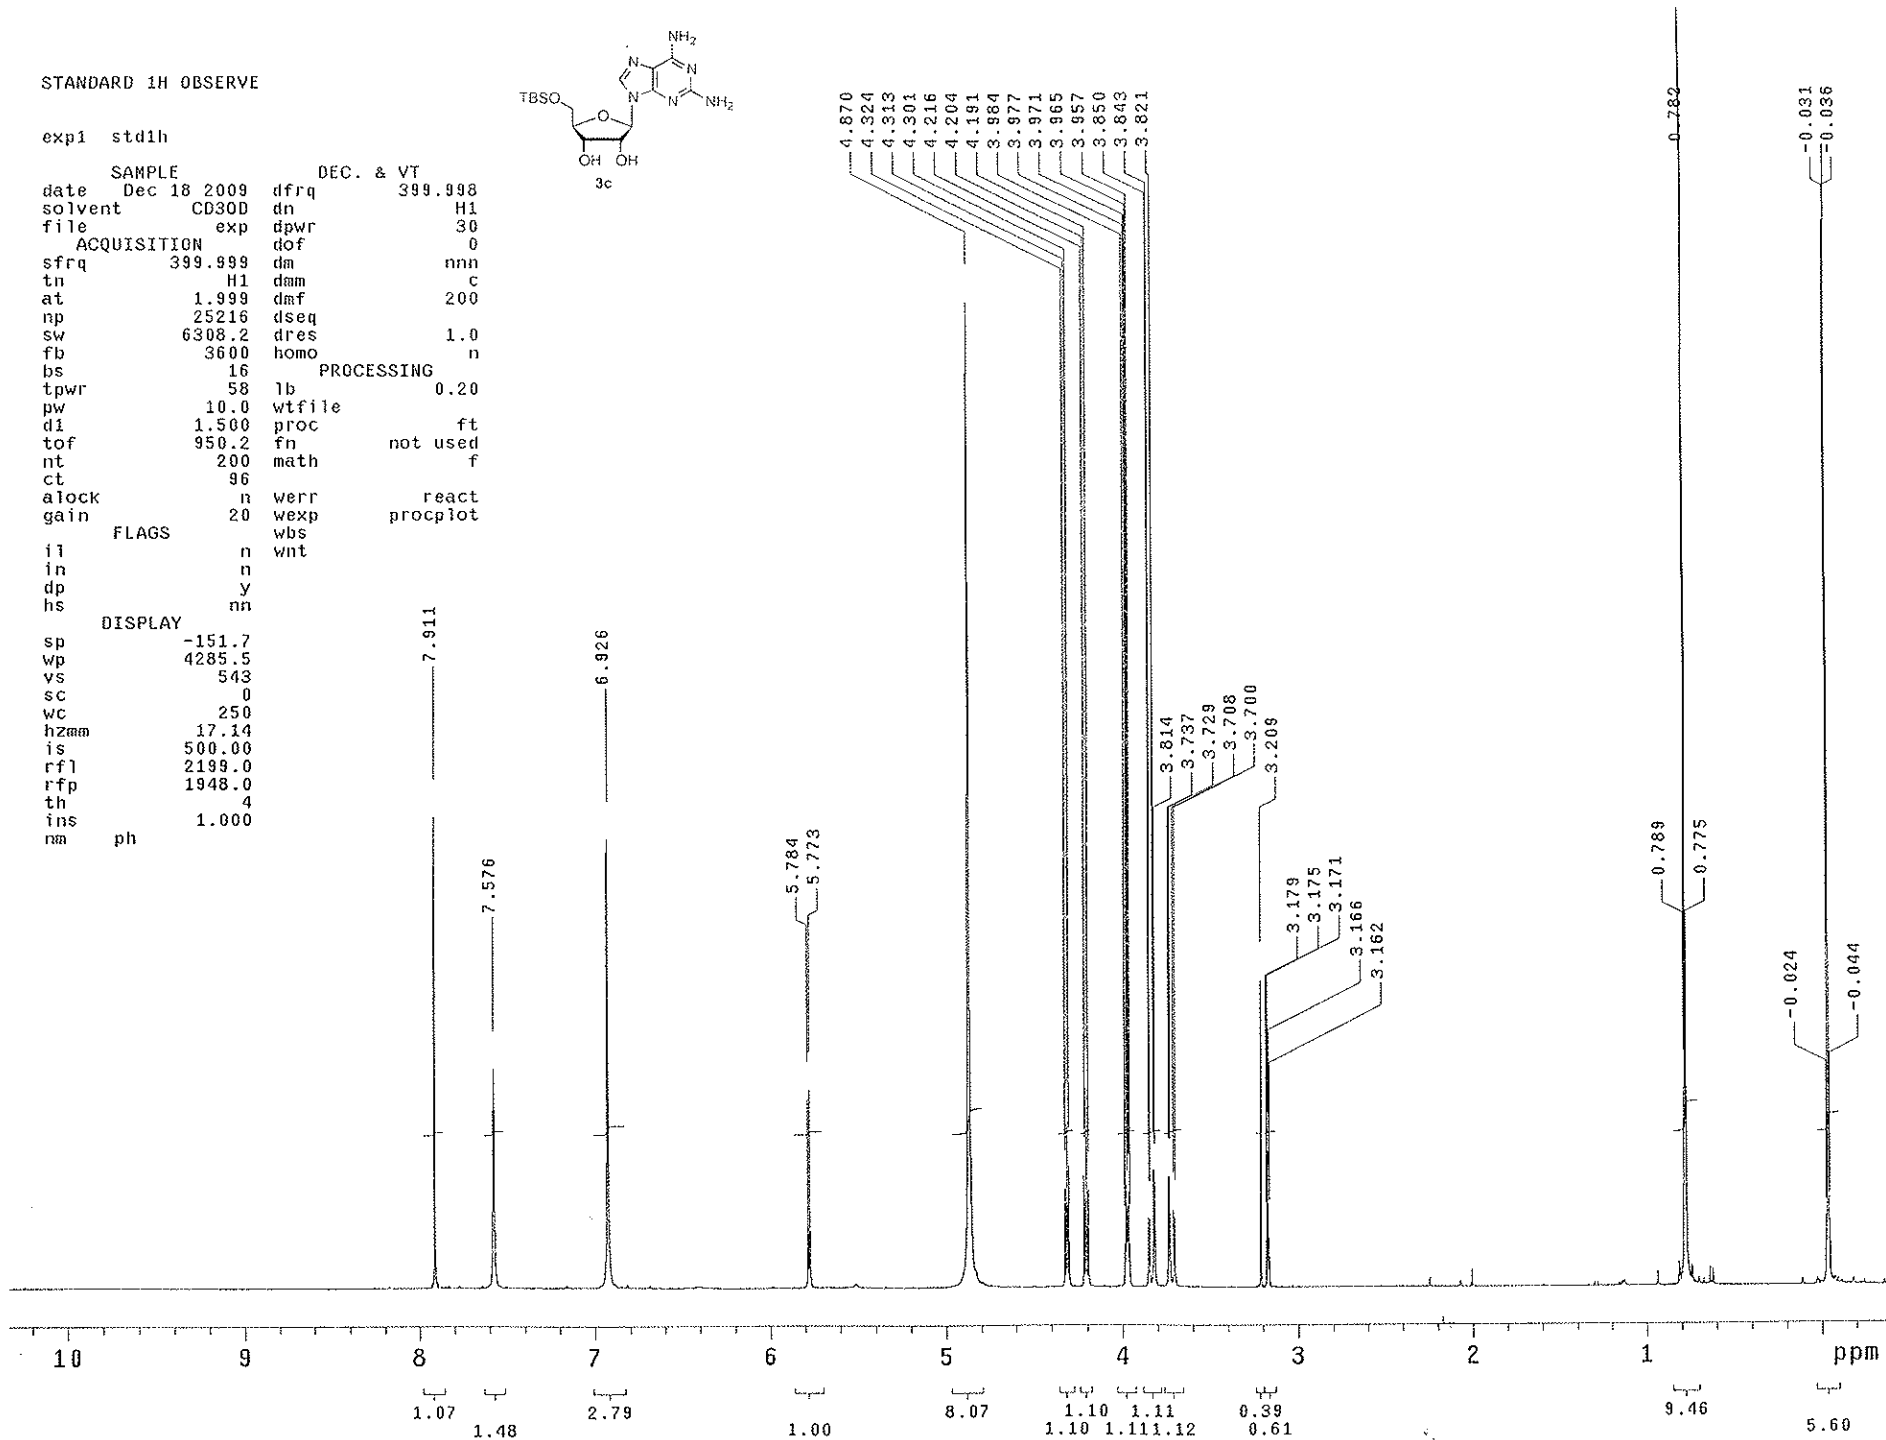

STANDARD 1H OBSERVE

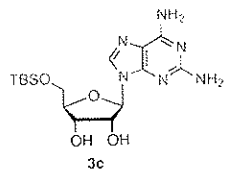

expi std1h

|             |             |            |          |
|-------------|-------------|------------|----------|
| SAMPLE      |             | DEC. & VT  |          |
| date        | Dec 18 2009 | dfrq       | 399.998  |
| solvent     | CD300       | dn         | H1       |
| file        | exp         | dpwr       | 30       |
| ACQUISITION |             | dof        | 0        |
| sfrq        | 399.999     | dm         | nnn      |
| tn          | H1          | dmm        | c        |
| at          | 1.999       | dmf        | 200      |
| np          | 25216       | dseq       |          |
| sw          | 6308.2      | dres       | 1.0      |
| fb          | 3600        | homo       | n        |
| bs          | 16          | PROCESSING |          |
| tpwr        | 58          | lb         | 0.20     |
| pw          | 10.0        | wfile      |          |
| d1          | 1.500       | proc       | ft       |
| tof         | 950.2       | fn         | not used |
| nt          | 200         | math       | f        |
| ct          | 96          |            |          |
| alock       | n           | werr       | react    |
| gain        | 20          | wexp       | procplot |
| FLAGS       |             | wbs        |          |
| ll          | n           | wnt        |          |
| in          | n           |            |          |
| dp          | y           |            |          |
| hs          | nn          |            |          |
| DISPLAY     |             |            |          |
| sp          | -242.9      |            |          |
| wp          | 886.8       |            |          |
| vs          | 543         |            |          |
| sc          | 0           |            |          |
| wc          | 250         |            |          |
| hzmm        | 3.55        |            |          |
| is          | 500.00      |            |          |
| rfl         | 2199.0      |            |          |
| rfp         | 1948.0      |            |          |
| th          | 4           |            |          |
| ins         | 1.000       |            |          |
| nm          | ph          |            |          |

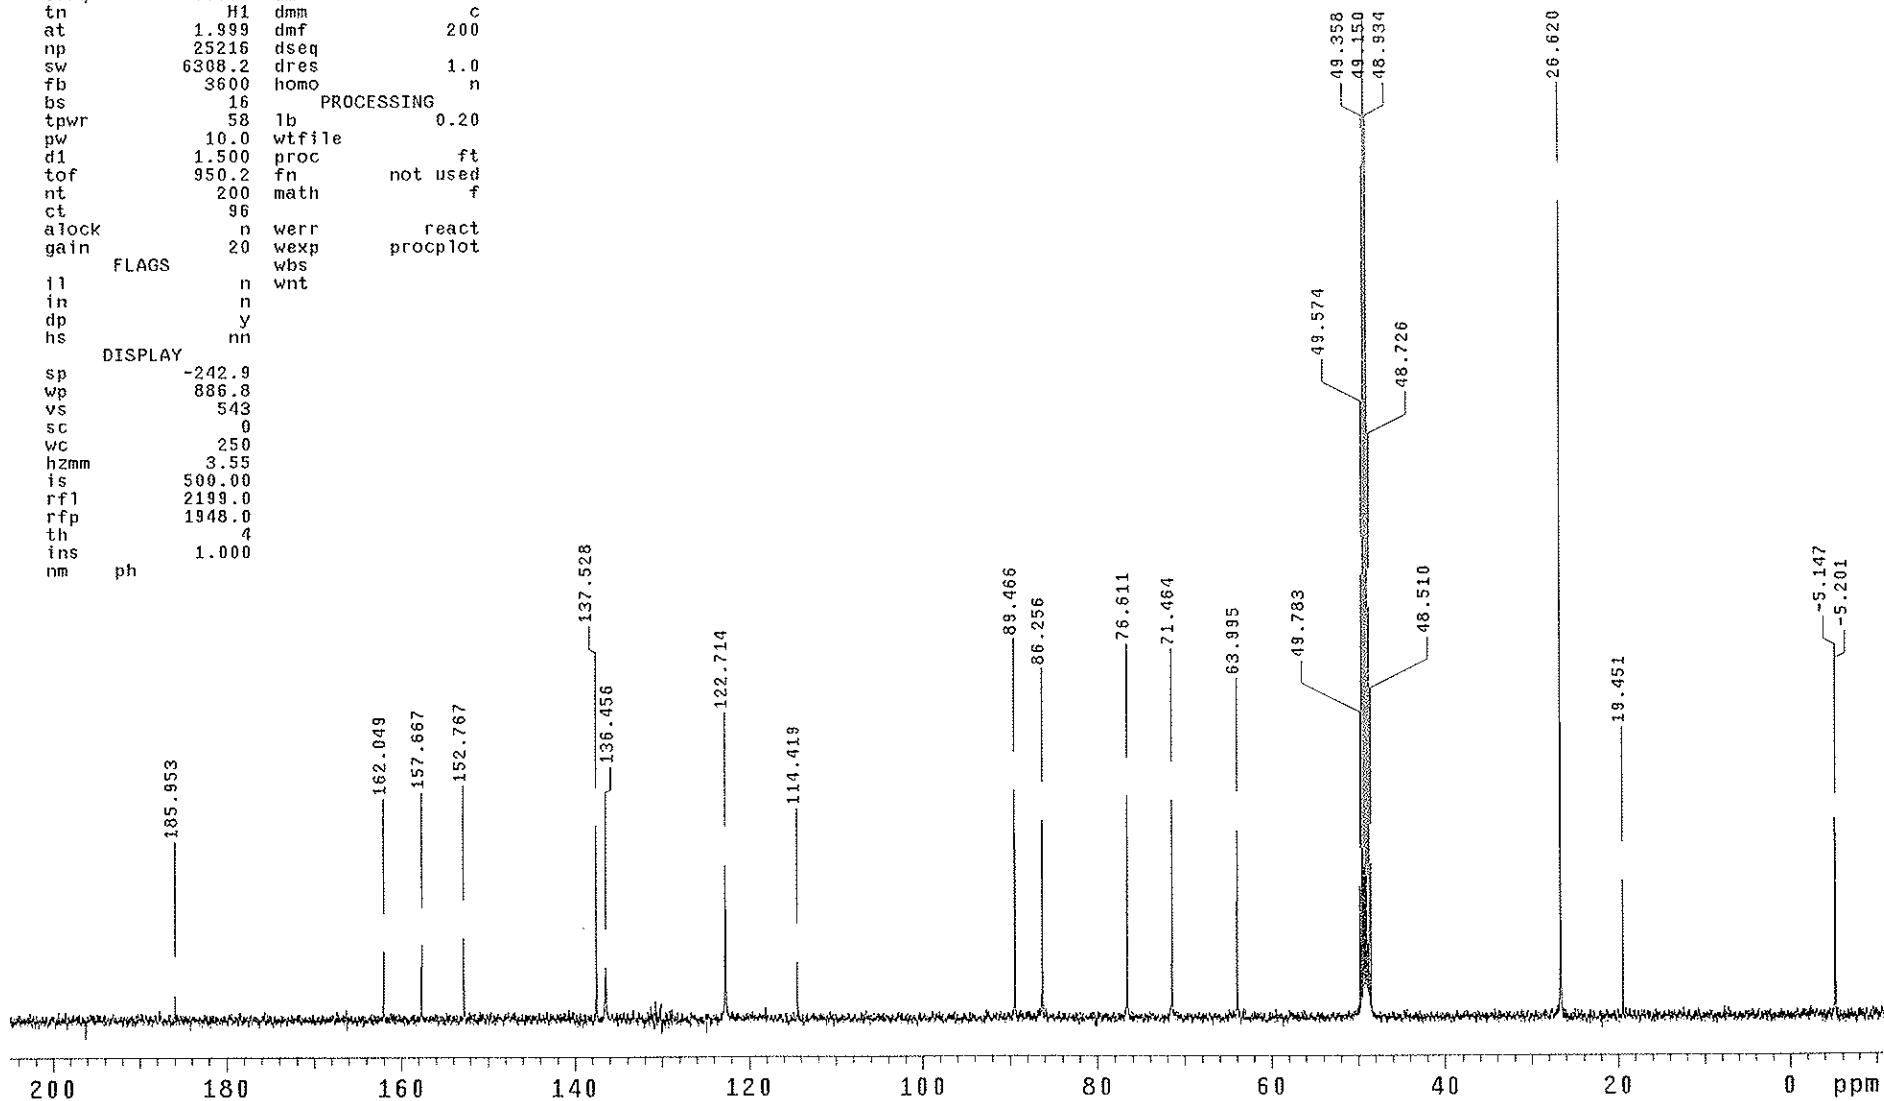

STANDARD 1H OBSERVE

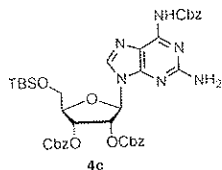

expt1 std1h

SAMPLE DEC. & VT  
 date Sep 29 2011 dfrq 399.996  
 solvent CDC13 dn H1  
 file exp dpwr 30  
 ACQUISITION dof 0  
 sfrq 399.997 dm nnn  
 tn H1 dmm c  
 at 1.999 dmf 200  
 np 25216 dseq  
 sw 6308.2 dres 1.0  
 fb 3600 homo n  
 bs 16  
 tpwr 58 lb 0.20  
 pw 10.0 wtfile  
 d1 1.500 proc ft  
 tof 950.2 fn not used  
 nt 120 math f  
 ct 48  
 alock n werr react  
 gain 20 wexp procptot  
 wbs  
 wnt  
 FLAGS  
 il n  
 in n  
 dp y  
 hs nn  
 DISPLAY  
 sp -106.7  
 wp 4227.4  
 vs 241  
 sc 0  
 wc 250  
 hzmm 16.91  
 is 500.00  
 rfl 197.55  
 rfp 1.000  
 th  
 ins  
 nm ph

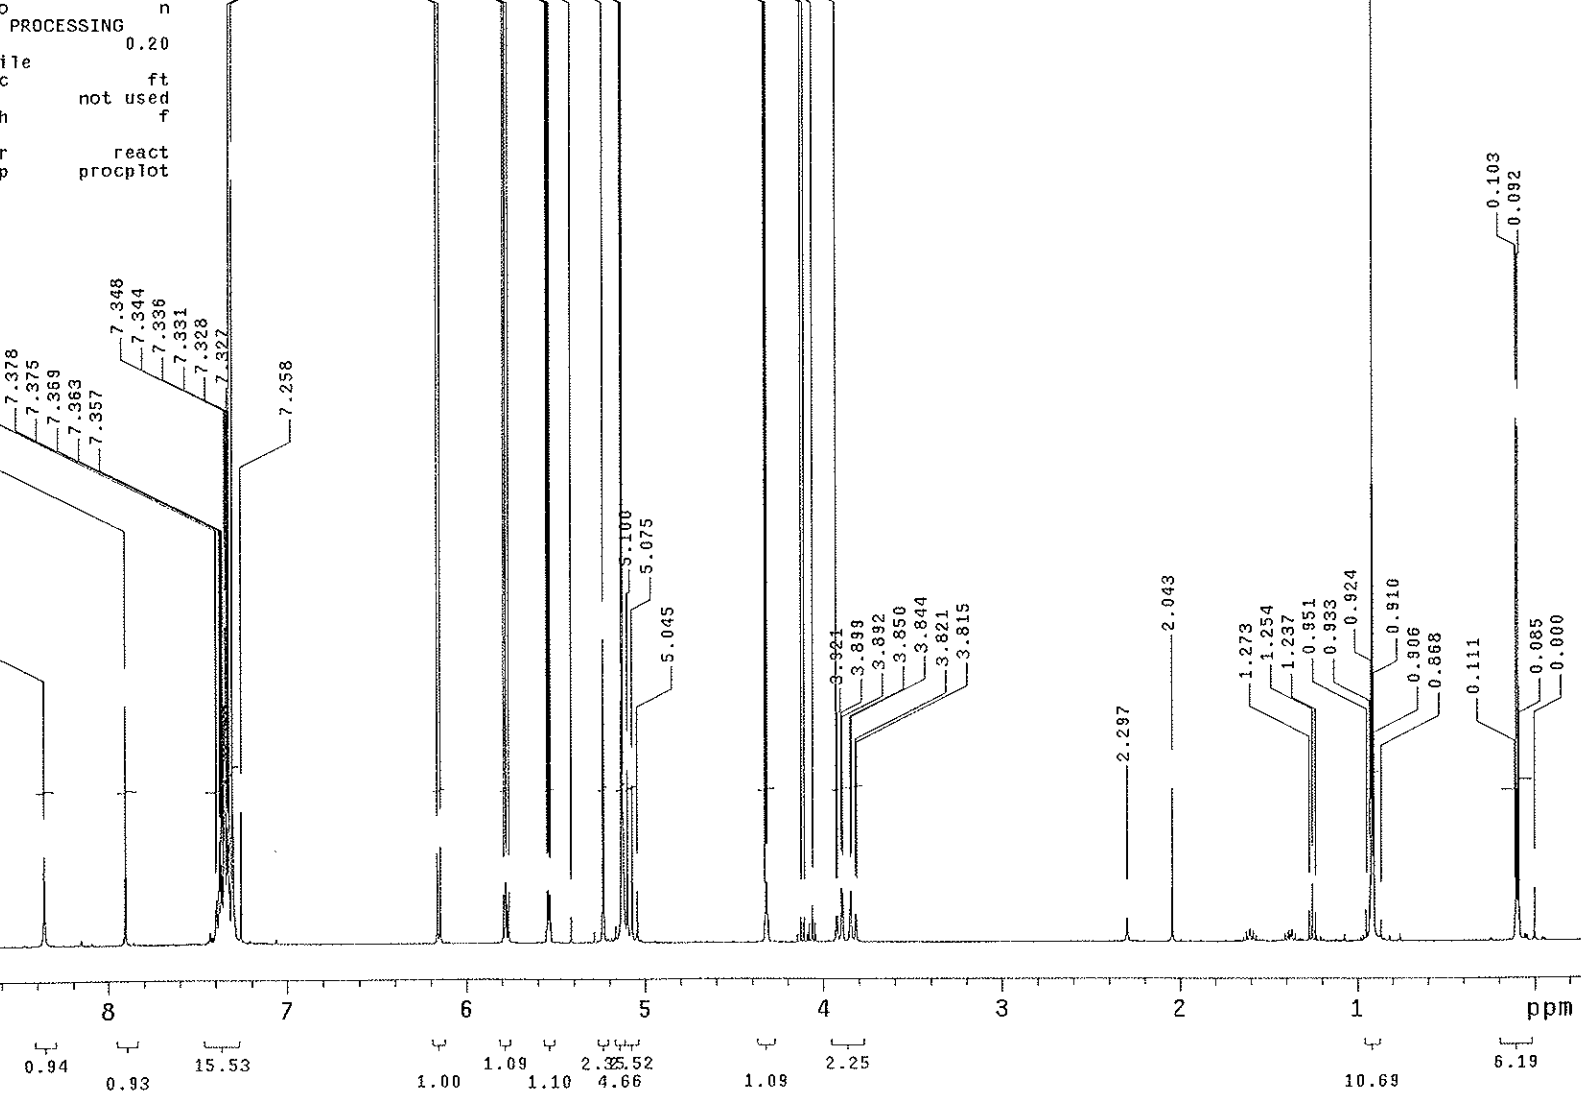

C13 STD

exp1 std1h

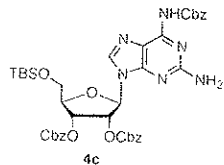

|             |             |            |          |
|-------------|-------------|------------|----------|
| SAMPLE      |             | DEC. & VT  |          |
| date        | Jul 15 2011 | dfrq       | 399.996  |
| solvent     | CDC13       | dn         | H1       |
| file        | exp         | dpwr       | 40       |
| ACQUISITION |             | dof        | -363.0   |
| sfrq        | 100.590     | dm         | yyy      |
| tn          | C13         | dmm        | w        |
| at          | 1.599       | dmf        | 9000     |
| np          | 81344       | dseq       |          |
| sw          | 25429.1     | dres       | 1.0      |
| fb          | 14000       | homo       | n        |
| bs          | 16          | PROCESSING |          |
| tpwr        | 58          | lb         | 2.00     |
| pw          | 6.0         | wtfile     |          |
| d1          | 4.000       | proc       | ft       |
| tof         | 1659.9      | fn         | 65536    |
| nt          | 1200        | math       | f        |
| ct          | 672         |            |          |
| alock       | n           | werr       | react    |
| gain        | 20          | wexp       | procplot |
|             |             | wbs        | testsn   |
|             |             | wnt        |          |
| FLAGS       |             |            |          |
| ll          | n           |            |          |
| in          | n           |            |          |
| dp          | y           |            |          |
| hs          | nn          |            |          |
| DISPLAY     |             |            |          |
| sp          | -1149.2     |            |          |
| wp          | 19648.9     |            |          |
| vs          | 48134       |            |          |
| sc          | 0           |            |          |
| wc          | 250         |            |          |
| hzmm        | 78.59       |            |          |
| is          | 500.00      |            |          |
| rfl         | 9317.4      |            |          |
| rfd         | 7767.7      |            |          |
| th          | 5           |            |          |
| ins         | 100.000     |            |          |
| al          | ph          |            |          |

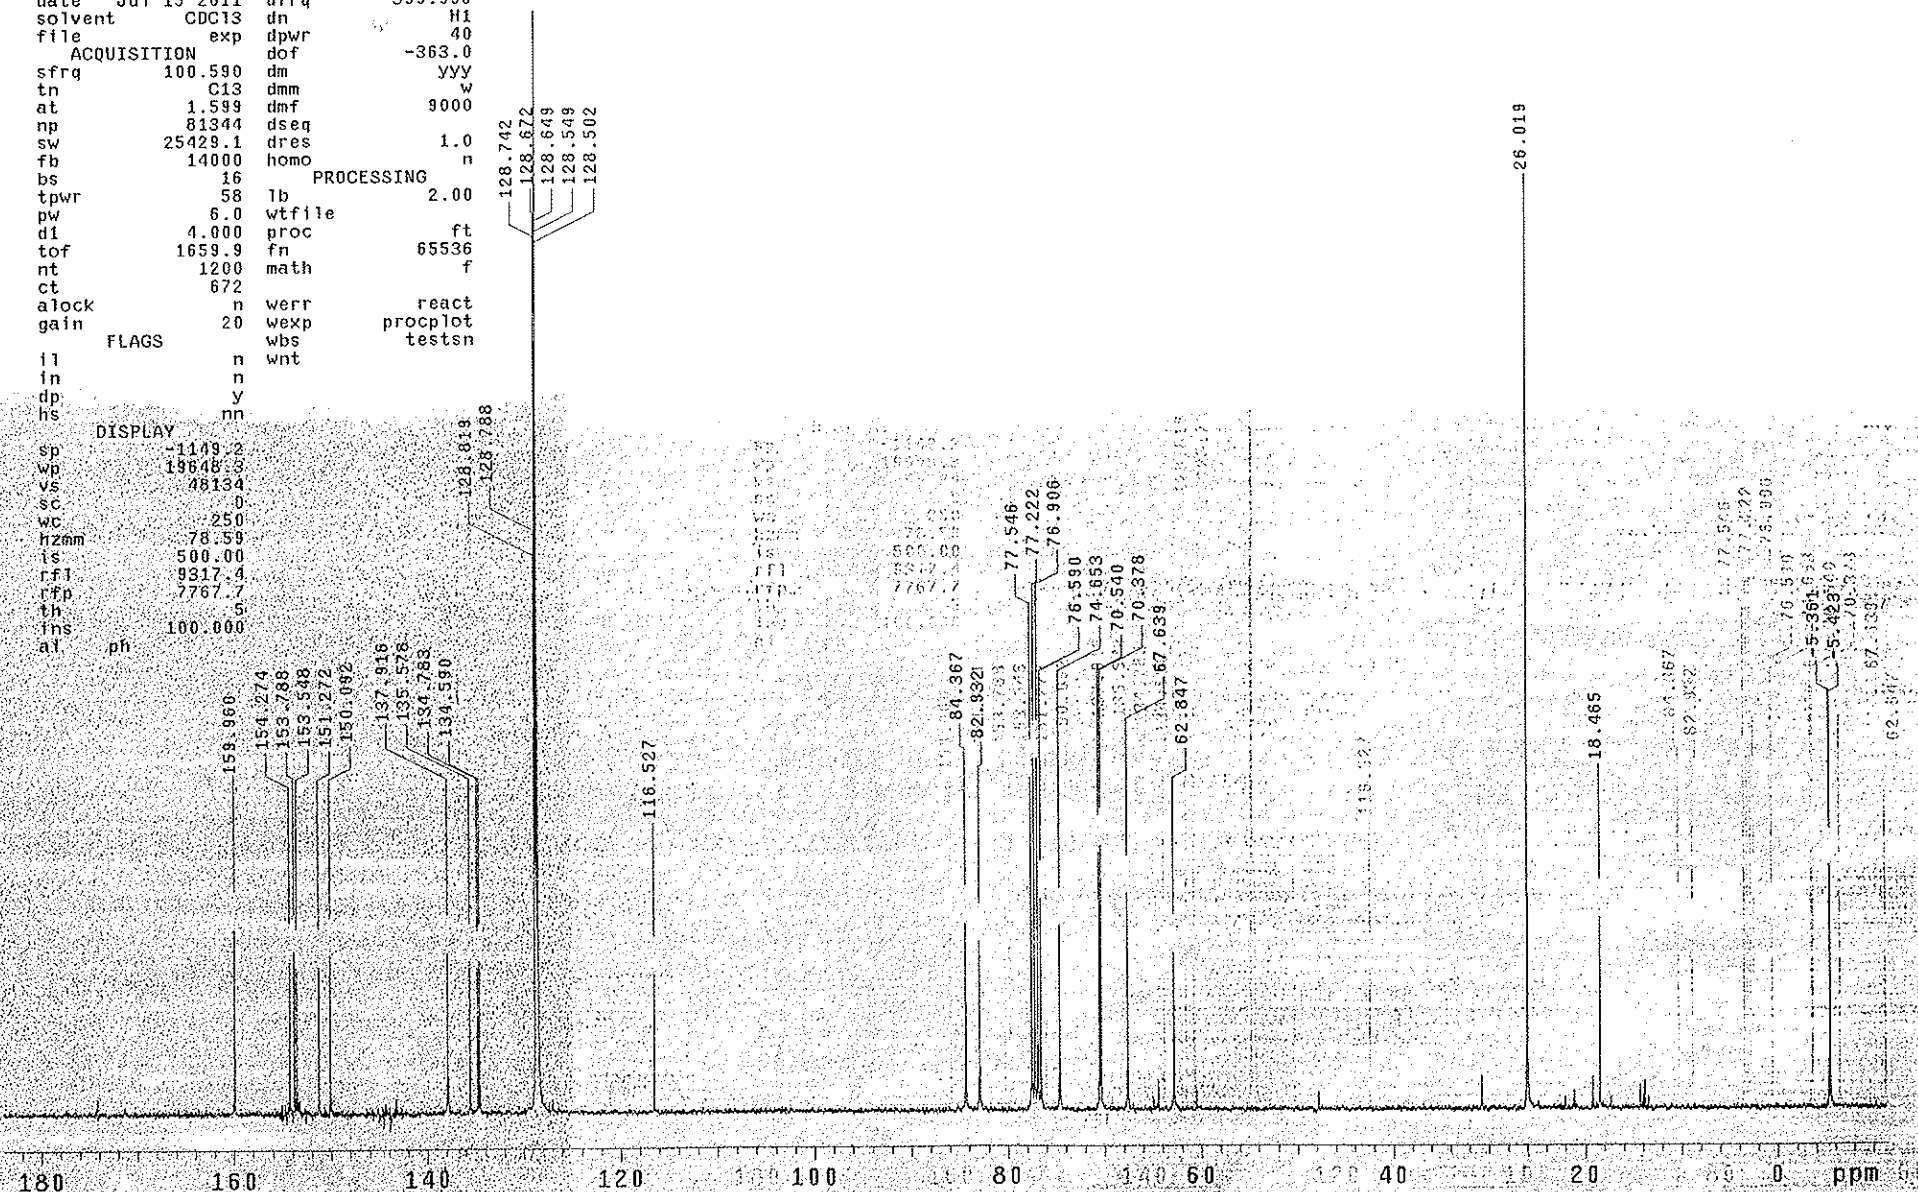

STANDARD 1H OBSERVE

exp1 std1h

SAMPLE  
 date Oct 1 2011  
 solvent CDC13  
 file exp

ACQUISITION  
 sfrq 399.997  
 tn H1  
 at 1.999  
 np 25216  
 sw 6308.2  
 fb 3600  
 bs 16  
 tpwr 56  
 pw 10.00  
 d1 1.500  
 tof 950.2  
 nt 120  
 ct 120  
 alock n  
 gain 20

DEC 7.320  
 7.299  
 7.292  
 7.286  
 7.282  
 7.272  
 7.268  
 7.261  
 7.253  
 7.247

PROCESSING  
 1b file  
 1b not used  
 ft  
 f  
 react  
 procplot

FLAGS

il n  
 in n  
 dp Y  
 hs nn

DISPLAY

sp -179.8  
 wp 4326.7  
 vs 231  
 sc 30  
 wc 0.250  
 hzmm 12.81  
 is 500.00  
 rfl 196.4  
 rfp 0  
 th 2  
 ins 1.000  
 nm ph

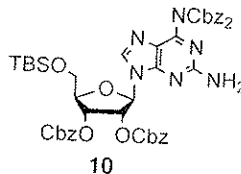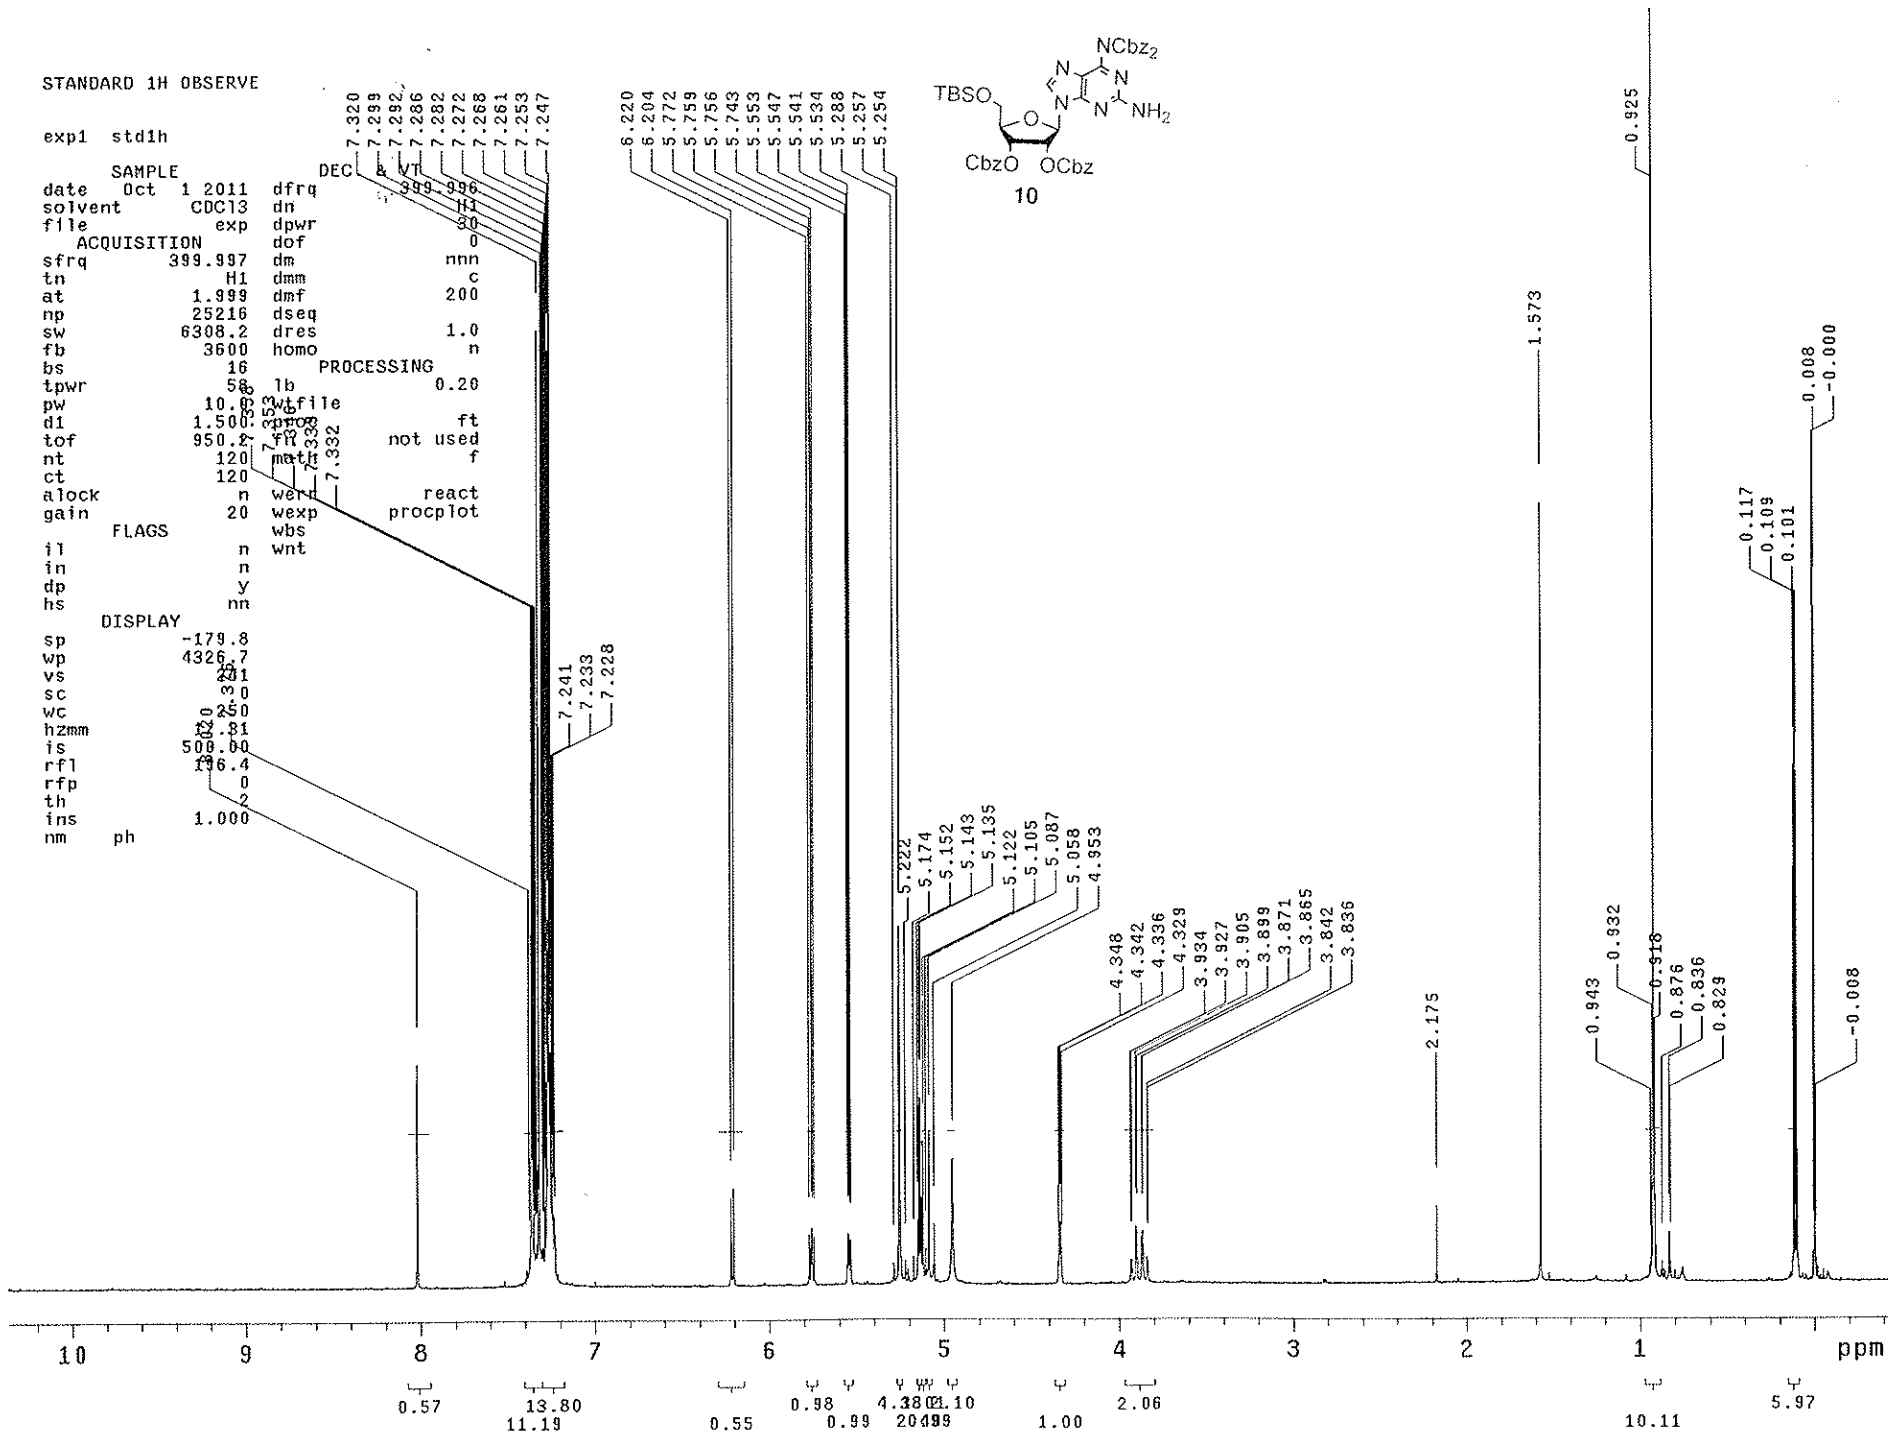

C13 STD

exp1 std1h

SAMPLE DEC. & VT  
date Oct 1 2011 dfrq 399.996  
solvent CDC13 dn H1  
file exp dpwr 40  
ACQUISITION dof -363.0  
sfrq 100.590 dm yyy  
tn C13 dmm w  
at 1.599 dmf 9000  
np 81344 dseq  
sw 25429.1 dres 1.0  
fb 14000 homo n  
bs 16  
tpwr 58 lb  
pw 6.0 wtfile  
di 4.000 proc  
tof 1659.9 fn  
nt 12000 math  
ct 9024  
alock n werr  
gain 20 wxp  
FLAGS wbs  
il n wnt  
in n  
dp y  
hs nn  
DISPLAY  
sp -1202.0  
wp 19614.1  
vs 716929  
sc 0  
wc 250  
hzmm 78.46  
is 500.00  
rfl 9303.4  
rfp 7767.7  
th 4  
ins 100.000

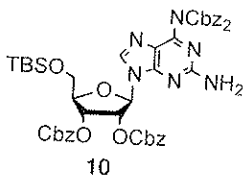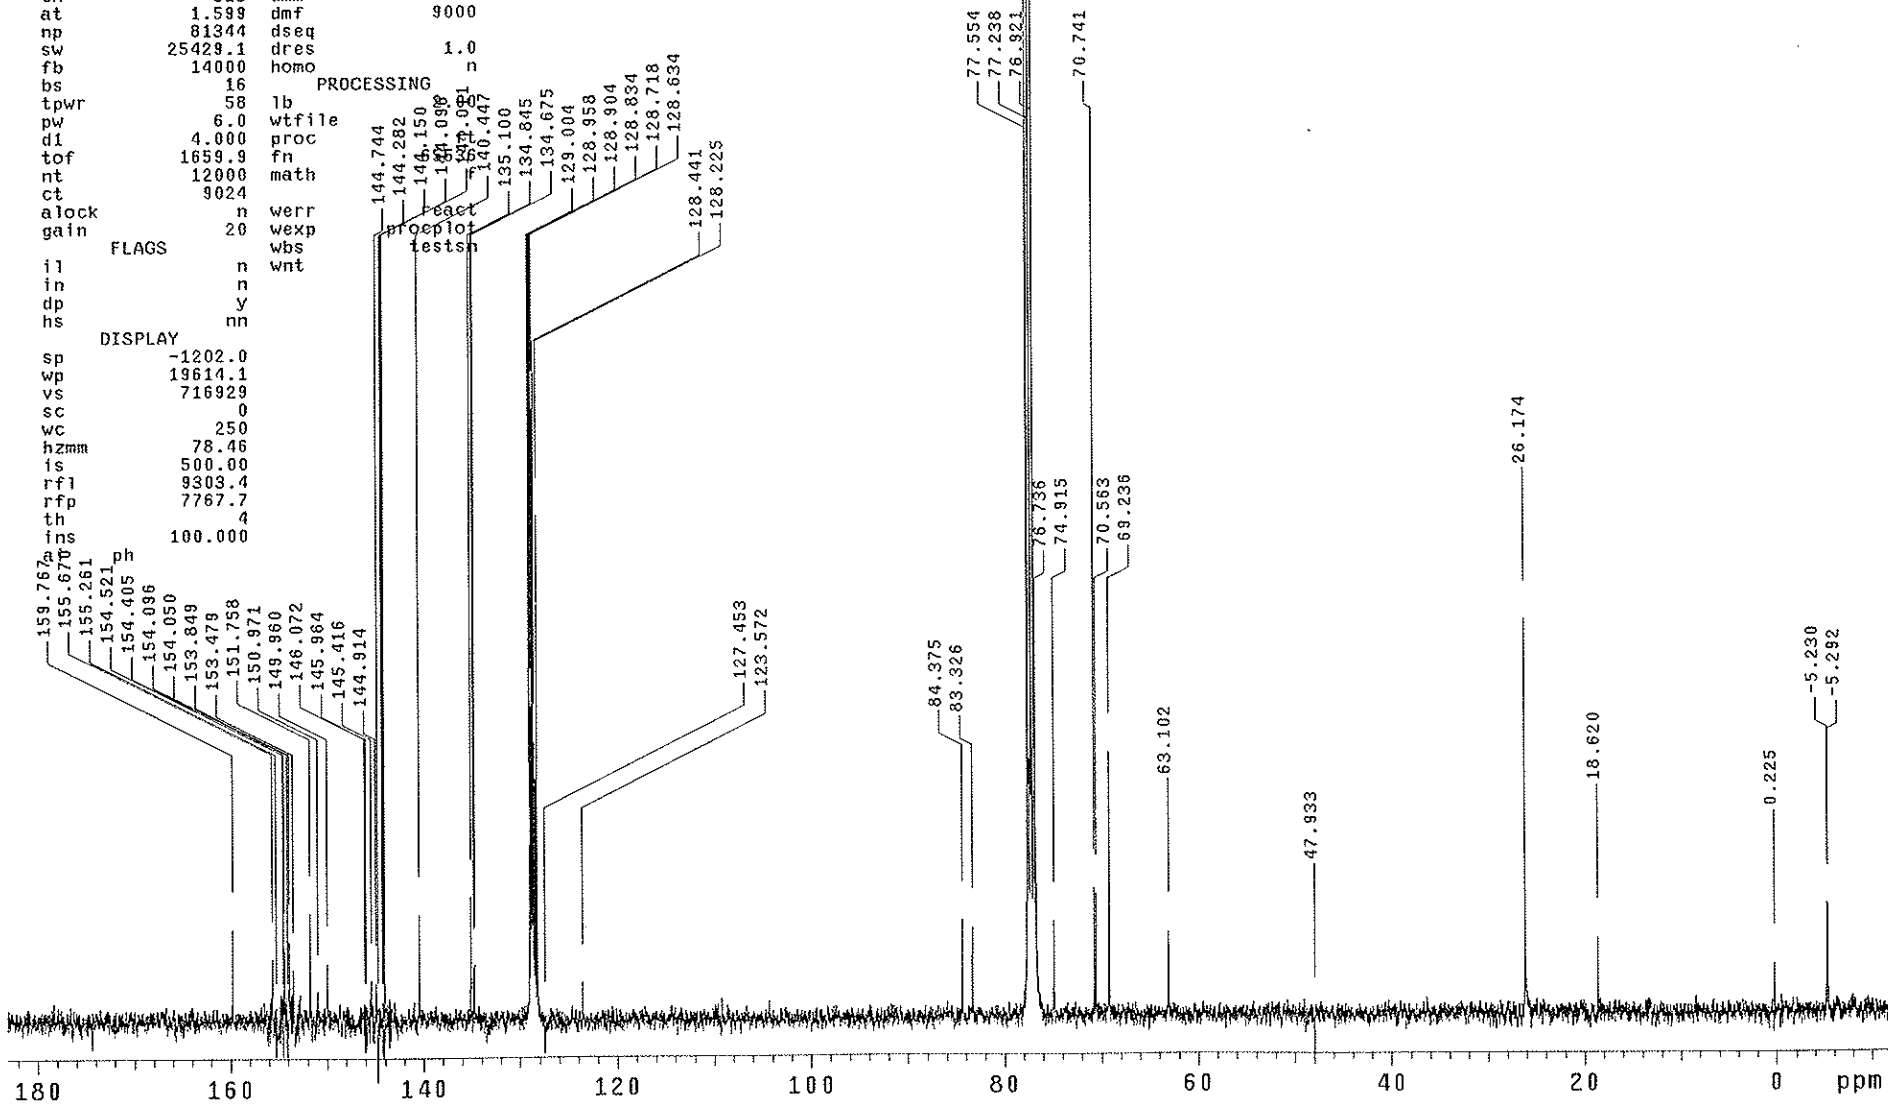



STANDARD 1H OBSERVE

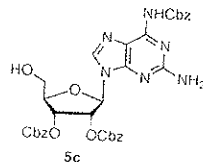

exp1 std1h

|             |             |            |          |
|-------------|-------------|------------|----------|
| SAMPLE      |             | DEC. & VT  |          |
| date        | Apr 29 2010 | dfrq       | 399.996  |
| solvent     | CDCl3       | dn         | H1       |
| file        | exp         | dpwr       | 30       |
| ACQUISITION |             | dof        | 0        |
| sfrq        | 399.997     | dm         | nnn      |
| tn          | H1          | dmm        | c        |
| at          | 1.999       | dmf        | 200      |
| np          | 25216       | dseq       |          |
| sw          | 6308.2      | dres       | 1.0      |
| fb          | 3600        | homo       | n        |
| bs          | 16          | PROCESSING |          |
| tpwr        | 58          | lb         | 0.20     |
| pw          | 10.0        | wtfile     |          |
| d1          | 1.500       | proc       | ft       |
| tof         | 950.2       | fn         | not used |
| nt          | 120         | math       | f        |
| ct          | 32          |            |          |
| alock       | n           | werr       | react    |
| gain        | 20          | wexp       | procplot |
| FLAGS       |             | wbs        |          |
| il          | n           | wnt        |          |
| in          | n           |            |          |
| dp          | y           |            |          |
| hs          | nn          |            |          |
| DISPLAY     |             |            |          |
| sp          | -91.3       |            |          |
| wp          | 4699.8      |            |          |
| vs          | 219         |            |          |
| sc          | 0           |            |          |
| wc          | 250         |            |          |
| hzmm        | 18.80       |            |          |
| is          | 500.00      |            |          |
| rfl         | 198.7       |            |          |
| rfp         | 0           |            |          |
| th          | 2           |            |          |
| ins         | 1.000       |            |          |
| nm          | ph          |            |          |

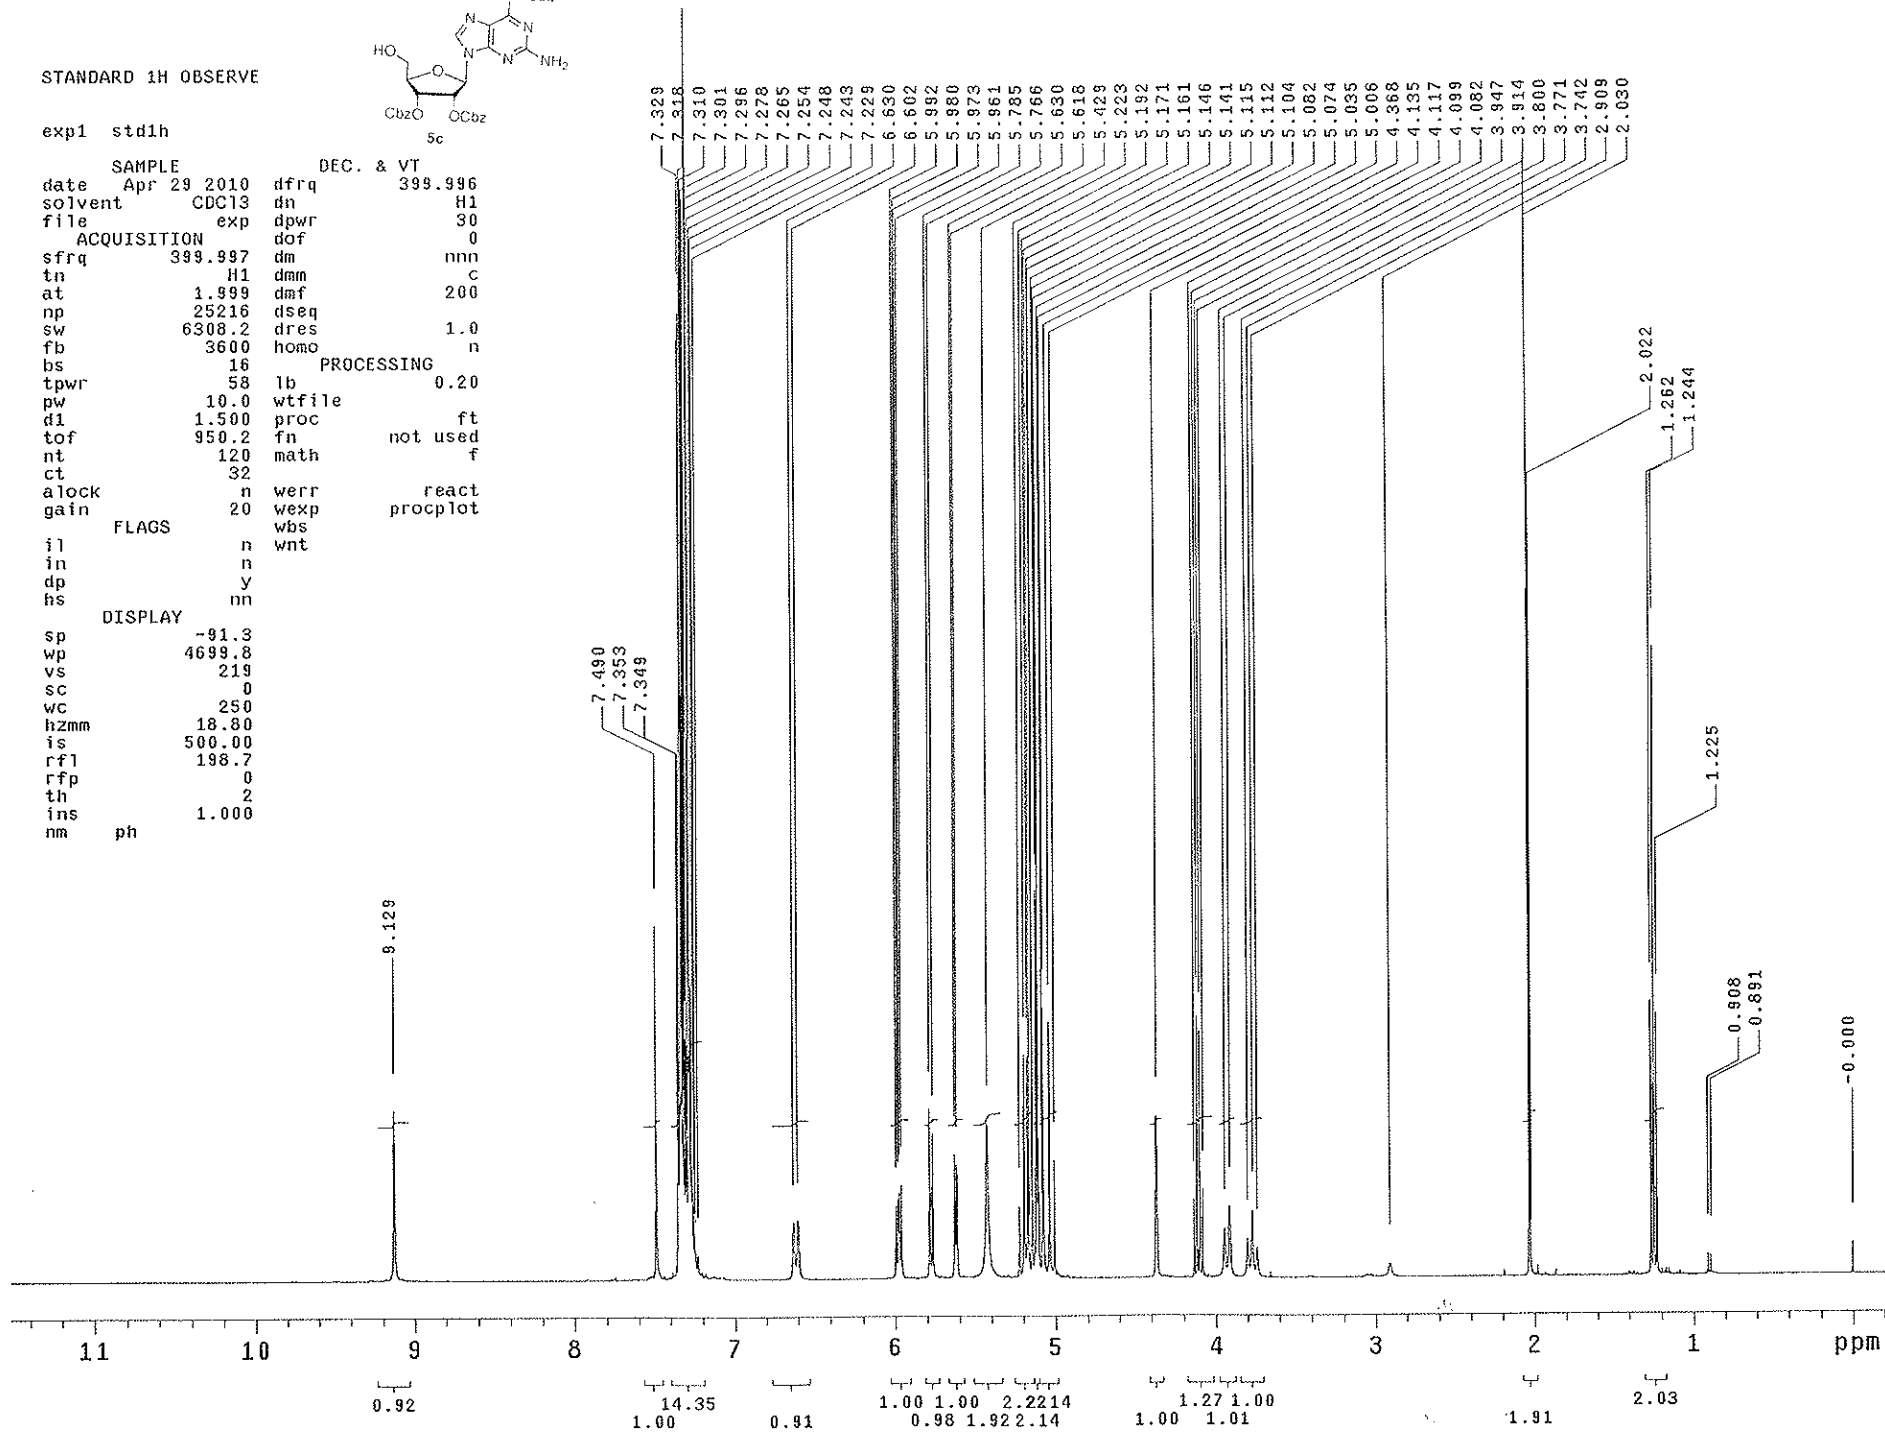

C13 STD

expi std1h

SAMPLE DEC. & VT  
date Jul 18 2011 dfrq 399.996  
solvent COG13 dn H1  
file exp dpwr 40  
ACQUISITION dof -363.0  
sfrq 100.590 dm yyy  
tn C13 dmm w  
at 1.599 dmf 9000  
np 81344 dseq  
sw 25429.1 dres 1.0  
fb 14000 homo n  
bs 16 PROCESSING  
tpwr 58 lb 2.00  
pw 6.0 wtfile  
dl 4.000 proc ft  
tof 1659.9 fn 65536  
nt 1200 math f  
ct 352  
alock n werr react  
gain 20 wexp procplot  
FLAGS wbs testsn  
wnt  
il n  
in n  
dp y  
hs nn  
DISPLAY  
sp 2305.0  
wp 15487.8  
vs 43758  
sc 0  
wc 250  
hzmm 61.95  
is 500.00  
rfl 9322.0  
rfp 7767.7  
th 4  
ins 100.000  
al ph

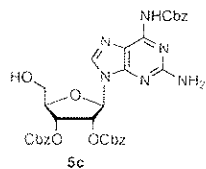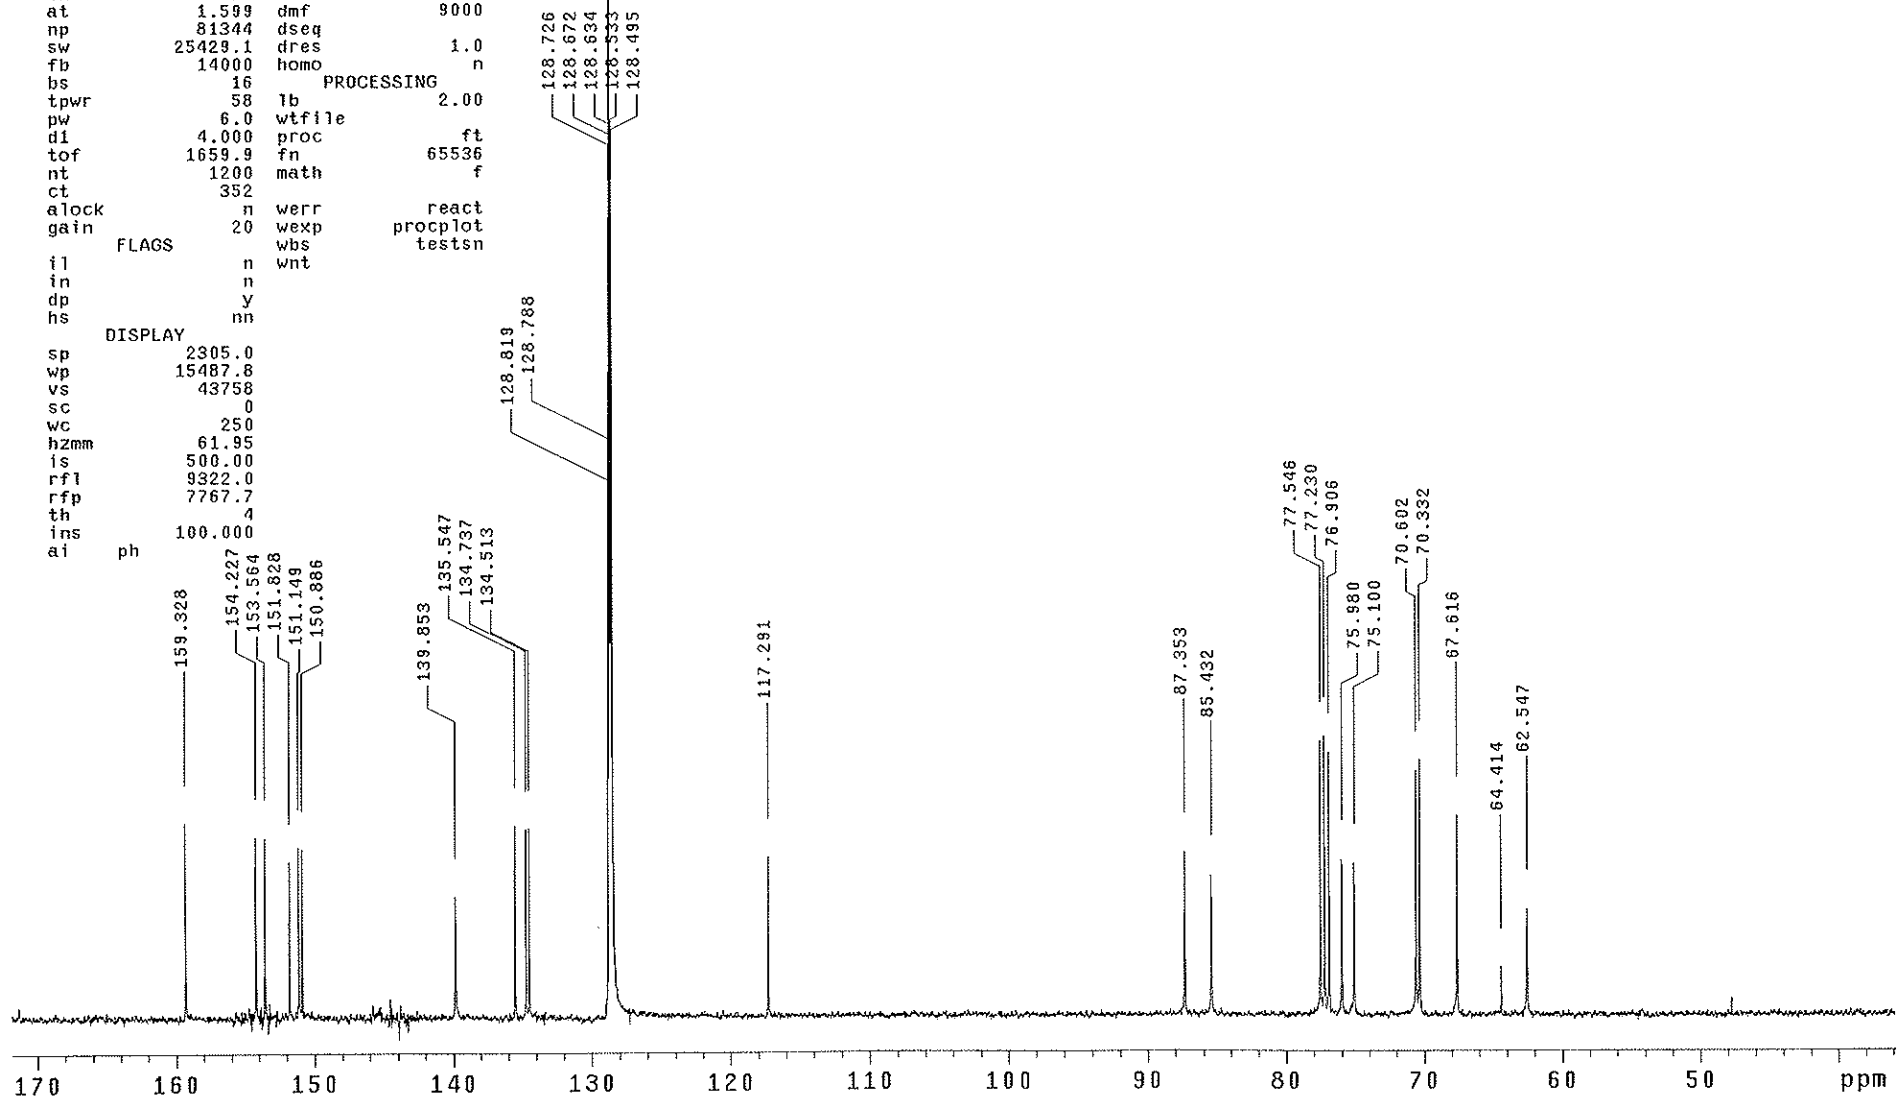

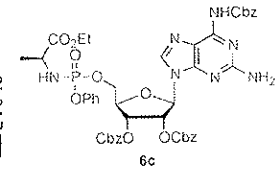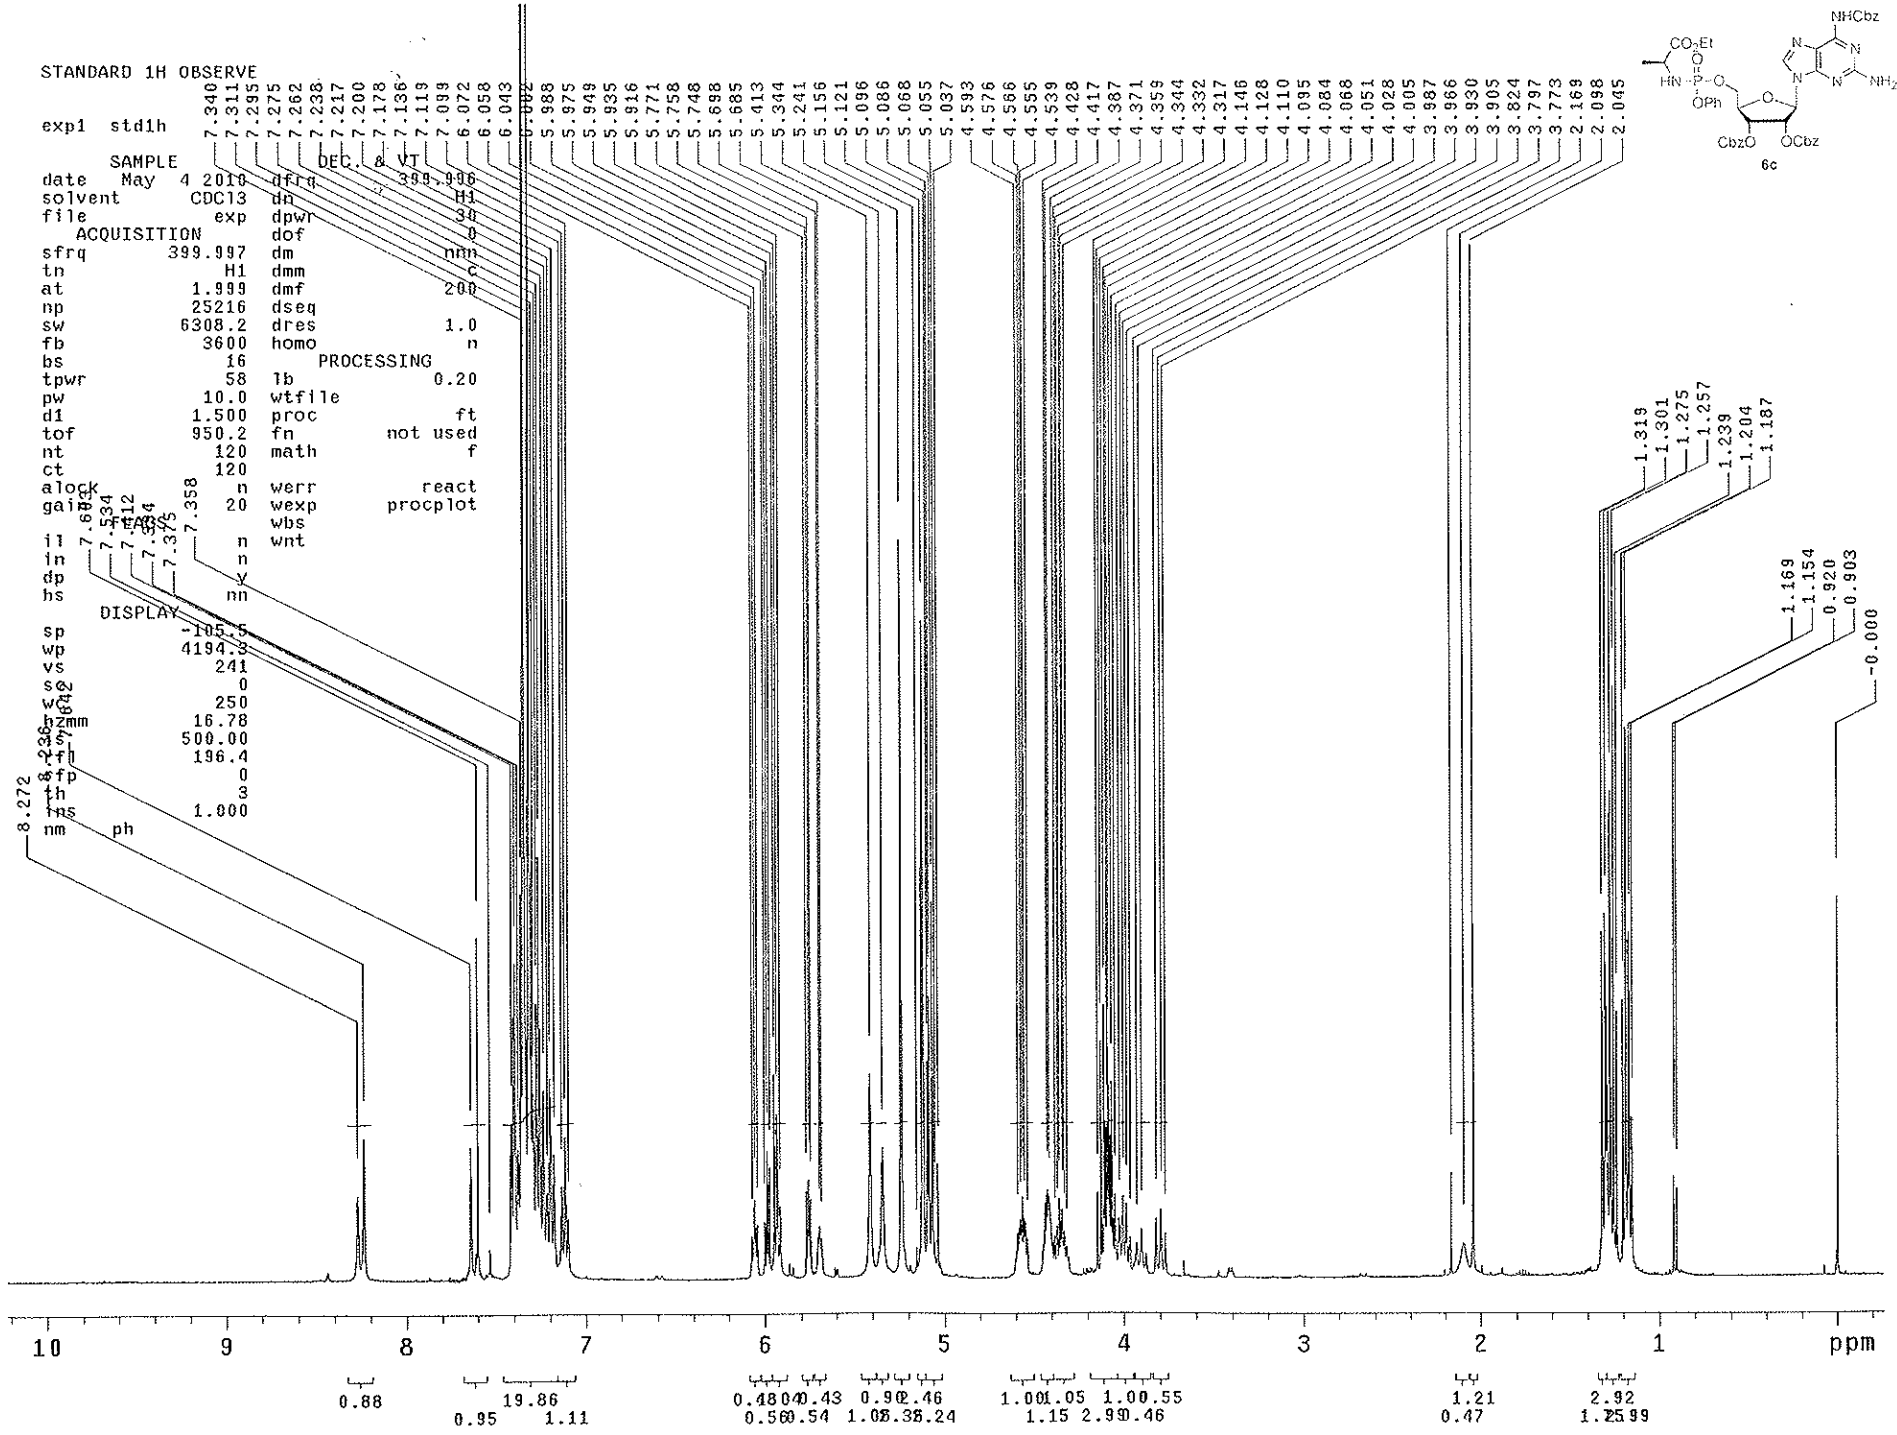

C13 STD

exp1 std1h

SAMPLE DEC. & VT  
 date Jul 28 2011 dfrq 399.996  
 solvent CDCl3 dn H1  
 file exp dpwr 40  
 ACQUISITION dof -363.0  
 sfrq 100.590 dm VVV  
 tn C13 dmm w  
 at 1.589 dmf 40.00  
 np 81344 dseq 128.726  
 sw 25429.1 dres 128.657  
 fb 14000 homo 128.595  
 bs 16 PROCESSING 128.504  
 tpwr 58 ib 125.239  
 pw 6.0 wtfile 120.578  
 dl 4.000 proc ft  
 tof 1659.9 fn 65536  
 nt 1200 math f  
 ct 624  
 alock n werr react  
 gain 20 wexp procplot  
 FLAGS wbs testsn  
 wnt

DISPLAY  
 sp -578.0  
 vp 19313.8  
 vs 137441  
 sc 0  
 wc 250  
 hzmm 77.26  
 is 153.77  
 rfl 153.77  
 rfp 153.77  
 th 153.77  
 ins 153.77  
 al ph

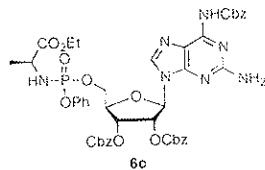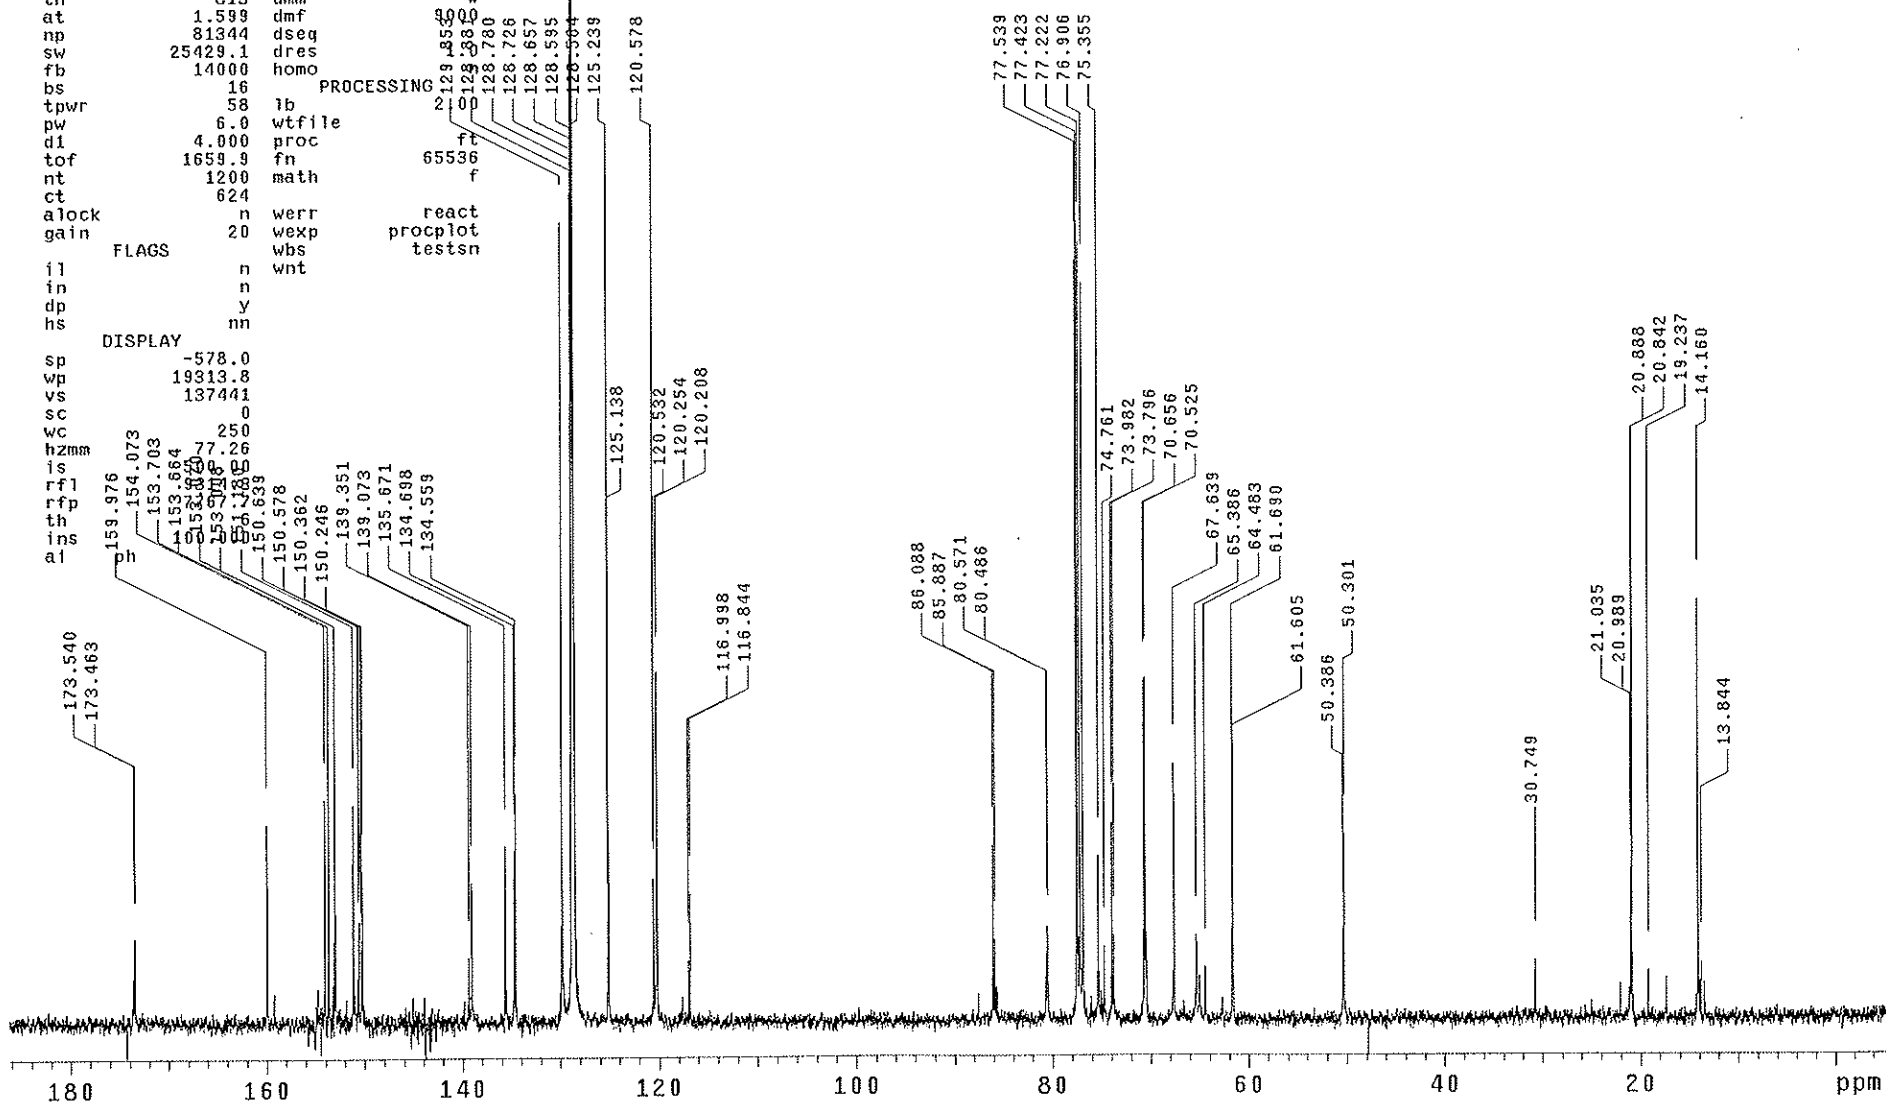

P31 STD

exp1 std1h

SAMPLE DEC. & VT  
date Jul 28 2011 dfrq 399.996  
solvent CDC13 dn. H1  
file exp dpwr 40  
ACQUISITION dof -363.0  
sfrq 161.918 dm yyy  
tn P31 dmm w  
at 2.134 dmf 9000  
np 35520 dseq  
sw 8321.2 dres 1.0  
fb 4600 homo n  
bs 16 PROCESSING  
tpwr 56 lb 0.34  
pw 15.0 wtfile  
di 2.000 proc ft  
tof -2517.0 fn not used  
nt 120 math f  
ct 32  
alock n werr react  
gain 20 wexp procplot  
FLAGS wbs testsn  
il n wnt  
in n  
dp y  
hs nn  
DISPLAY  
sp -6349.8  
wp 8321.2  
vs 3377  
sc 0  
wc 250  
hzmm 33.28  
is 500.00  
rfl 6349.8  
rfp 0  
th 7  
ins 1.000  
al ph

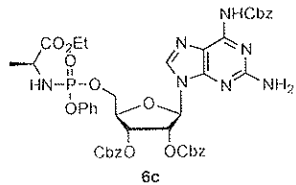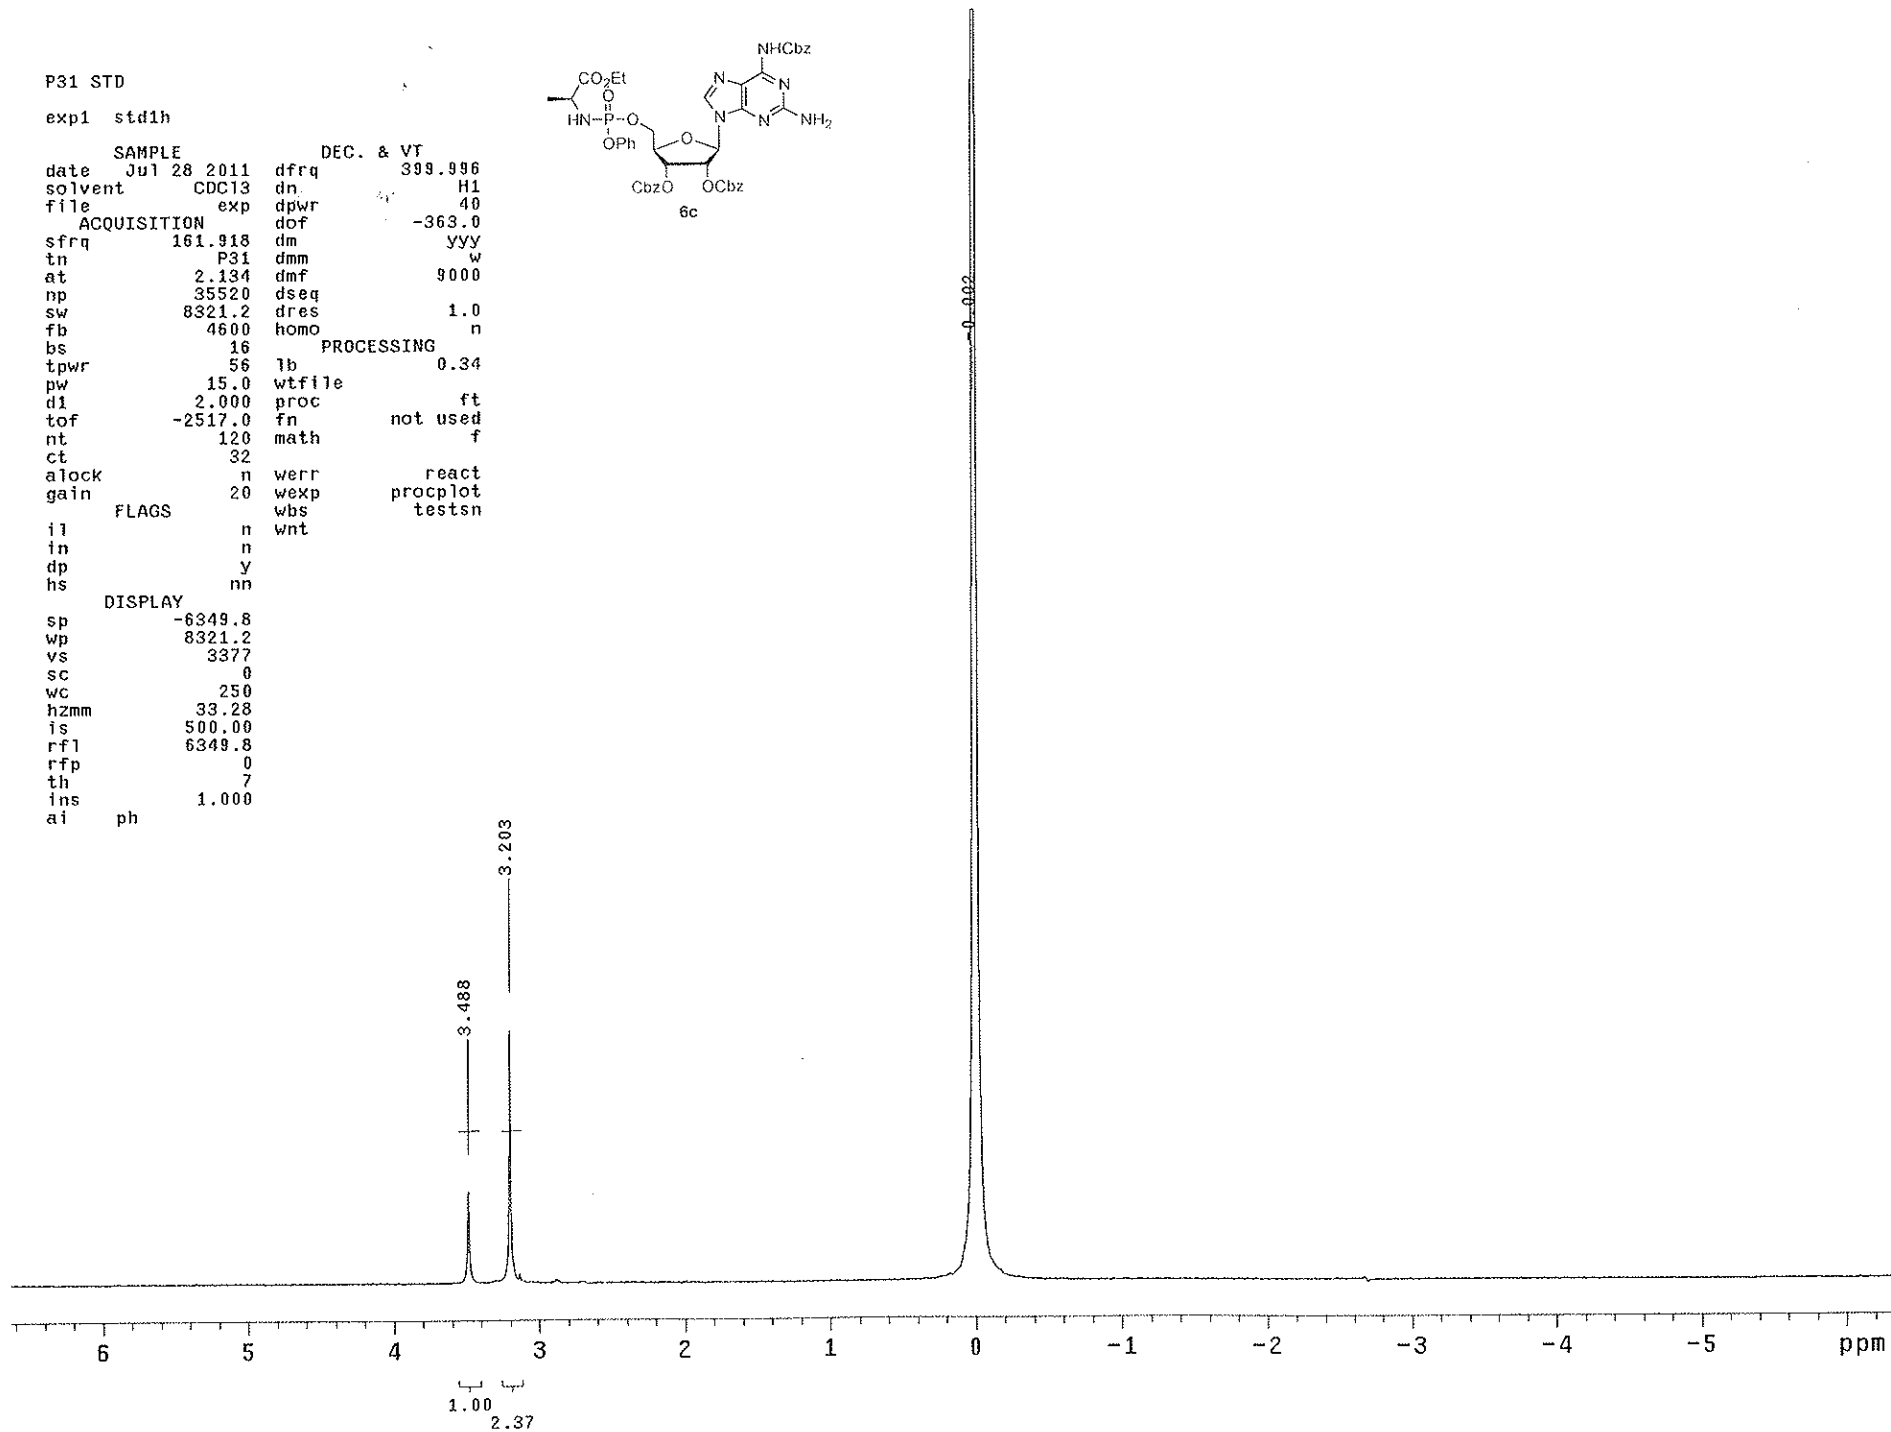

C13 STD

exp1 std1h

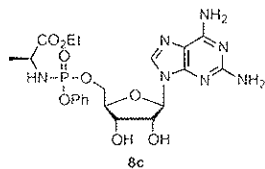

SAMPLE DEC. & VT  
date Feb 5 2012 dfrq 399.998  
solvent DMSO dn H1  
file exp dpwr 40  
ACQUISITION dof -363.0  
sfrq 100.590 dm yyy  
tn C13 dmm v  
at 1.599 dmf 9000  
np 81344 dseq  
sw 25429.1 dres 1.0  
fb 14000 homo n  
bs 16 PROCESSING  
tpwr 58 lb 2.00  
pw 6.0 wtfile  
d1 4.000 proc  
tof 1659.9 fn 65536  
nt 4400 math  
ct 2448  
alock n werr react  
gain 20 wexp procplot  
FLAGS testsn  
il n  
in n  
dp y  
hs nn  
DISPLAY  
sp -831.5  
wp 19614.1  
vs 90000  
sc 0  
wc 250  
hzmm 78.46  
is 500.00  
rfl 5573.7  
rfl 3973.9  
th 3  
ins 100.000  
af ph

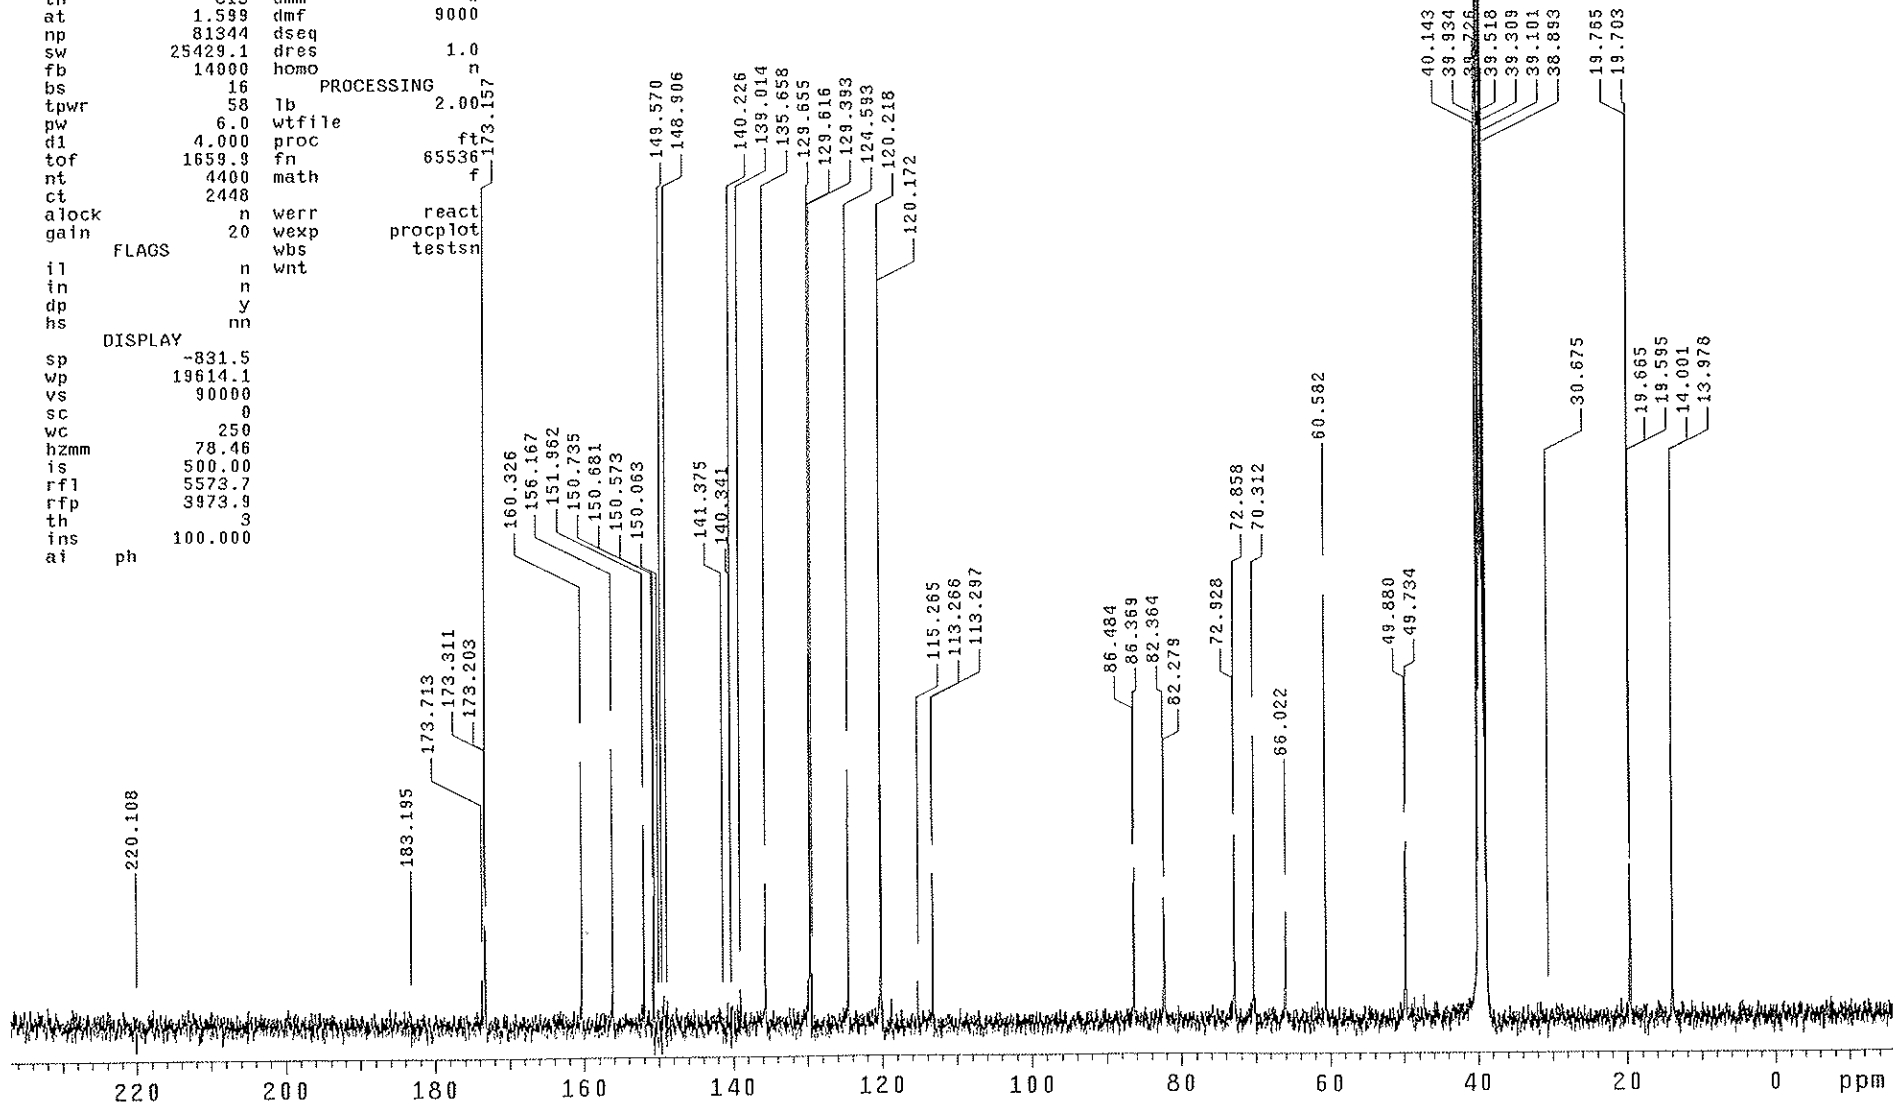

STANDARD 1H OBSERVE

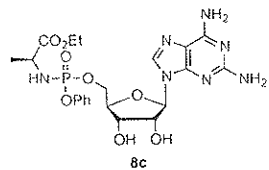

exp1 std1h

SAMPLE DEC. & VT  
 date Feb 6 2012 dfrq 399.998  
 solvent DMSO dn H1  
 file exp dpwr 30  
 ACQUISITION dof 0  
 sfrq 399.999 dm nnn  
 tn H1 dmm c  
 at 1.999 dmf 200  
 np 25216 dseq  
 sw 6308.2 dres 1.0  
 fb 3600 homo n  
 bs 16  
 tpwr 58 1b PROCESSING 0.20  
 pw 10.0 wtfile  
 dl 1.500 proc ft  
 tof 950.2 fn not used  
 nt 120 math f  
 ct 80  
 alock n werr react  
 gain 20 wexp proplot

FLAGS

il n  
 in n  
 dp n  
 hs n  
 DISPLAY  
 sp 418  
 wp 16.74  
 vs 500.00  
 sc 1190.2  
 wc 1000.0  
 hzmm 3  
 is 1.000  
 rfl  
 rfp  
 th  
 ins  
 nm ph

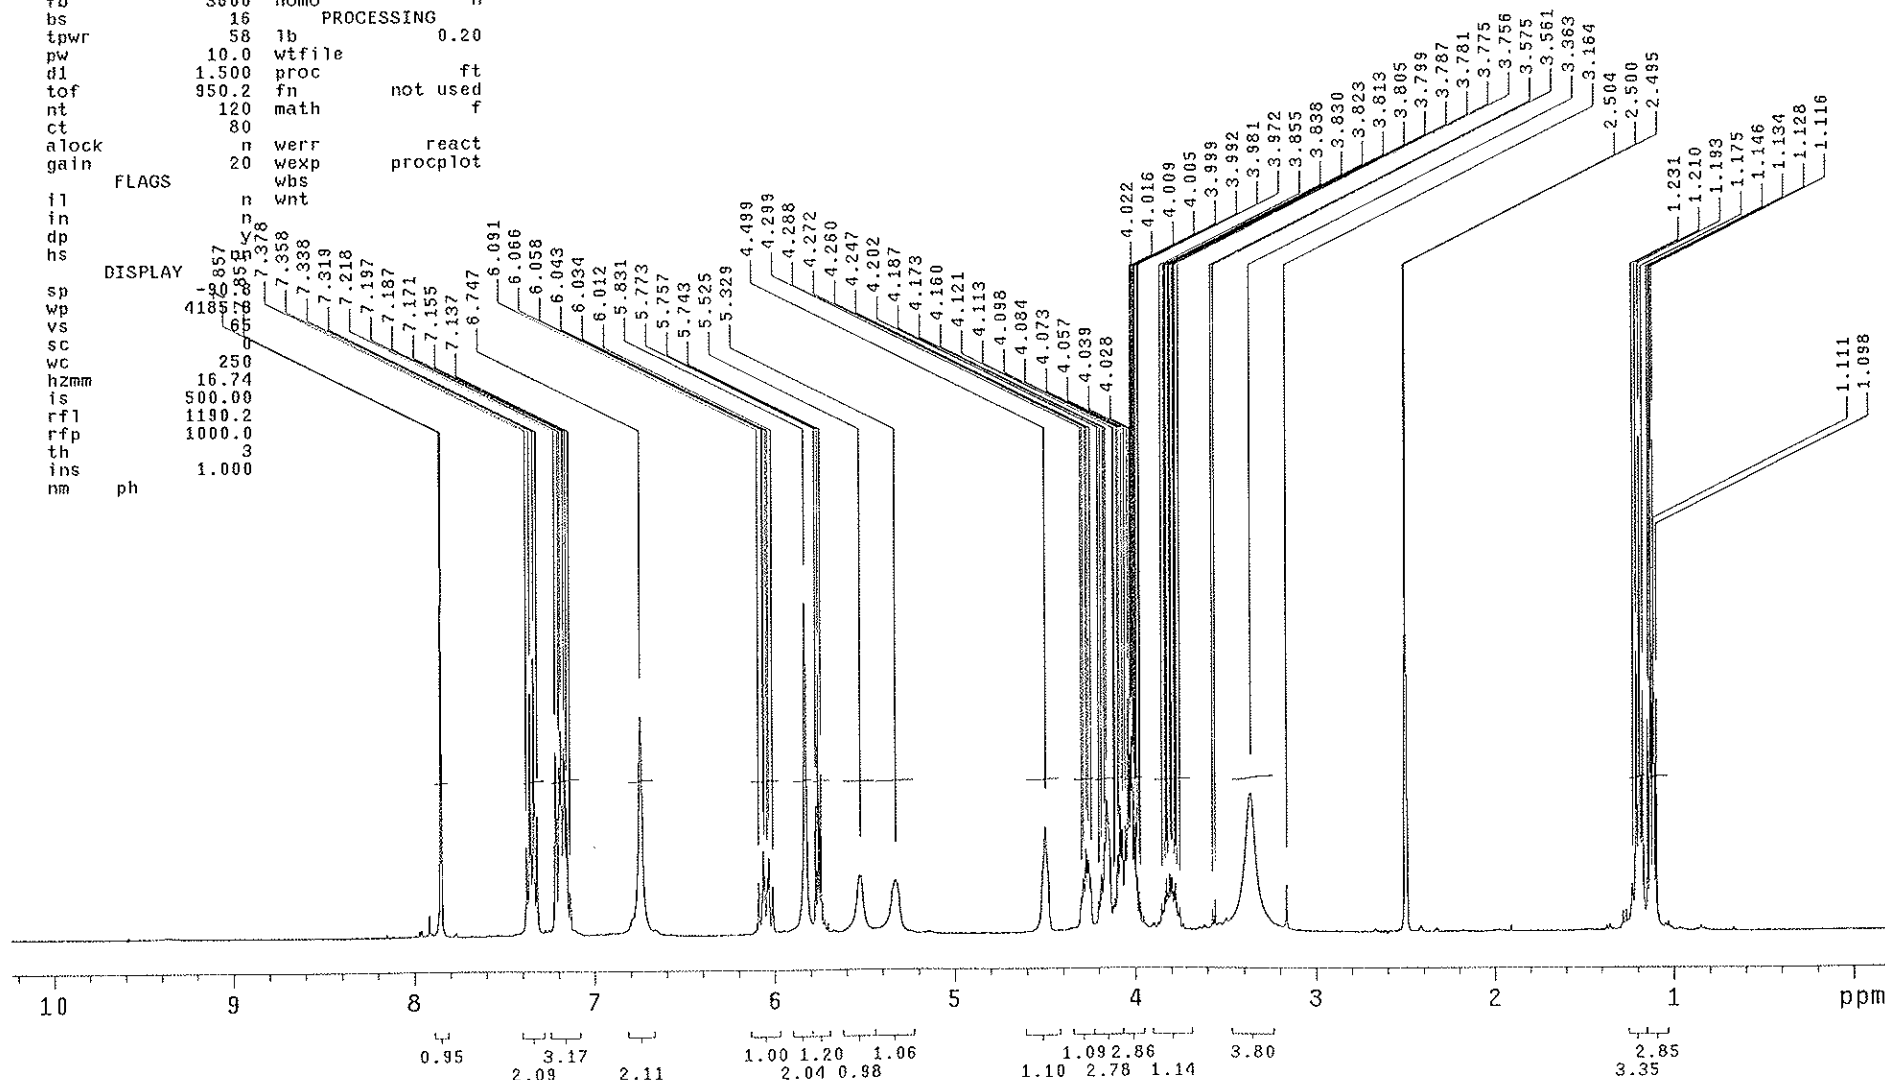

file

P31 STD

expl std1h

```

SAMPLE          DEC. & VT
date Feb 6 2012 dfrq      399.998
solvent DMSO           dn      H1
file exp             dpwr     40
ACQUISITION     dof      -363.0
sfrq 161.919       dm       yyy
tn P31             dmm       w
at 2.134           dmf      9000
np 35520           dseq
sw 8321.2          dres     1.0
fb 4600            homo     n
bs 16              PROCESSING
tpwr 56            lb       0.34
pw 15.0            wtfile
d1 2.000           proc
tof -2517.0        fn      not used
nt 120             math     f
ct 120
alock n            werr     react
gain 20            wexp    procplot
                               wbs     testsn
                               wnt

FLAGS
il n
in n
dp y
hs nn

DISPLAY
sp -1794.7
wp 3531.7
vs 4000
sc 0
wc 250
hzmm 14.13
is 500.00
rfl 6255.8
rfp 0
th 4
ins 1.000
ai ph

```

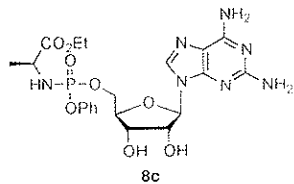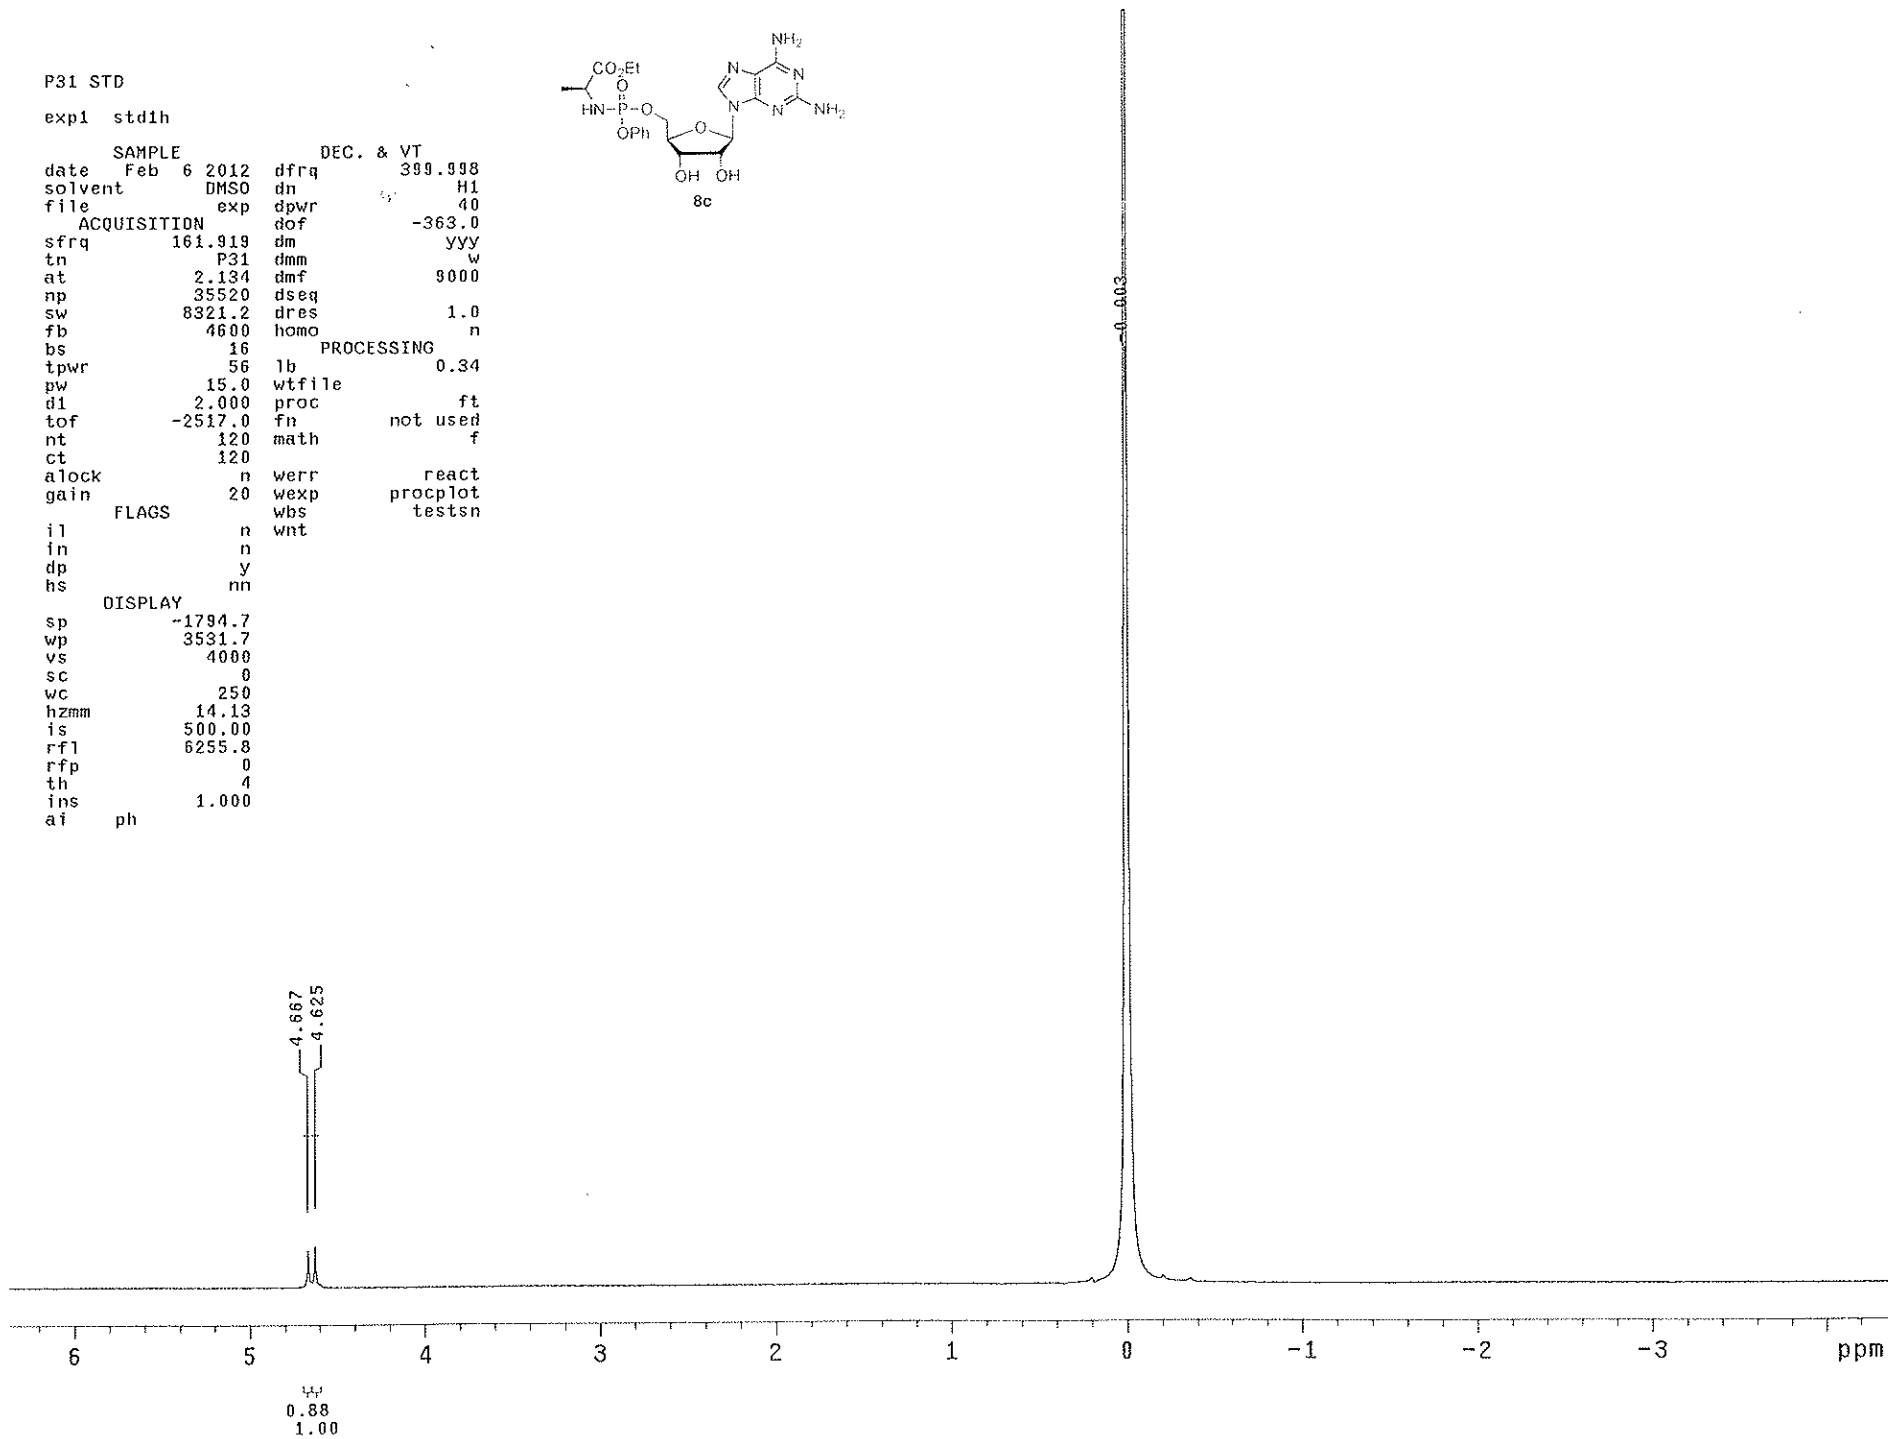

Supplement: NIHMS375184-supplement-2_si_002.pdf [file NIHMS375184-supplement-2_si_002.pdf]
